# Supplementary material for: Reversible covalent c-Jun N-terminal kinase inhibitors targeting a specific cysteine by precision-guided Michael-acceptor warheads
Source: PubMed Central journal article supplement — Nat Commun. 2024 Oct 4;15:8606. doi: 10.1038/s41467-024-52573-2 (PMC11452492; doi:10.1038/s41467-024-52573-2), 2024-10-04
Supplement: 41467_2024_52573_MOESM1_ESM.pdf [file 41467_2024_52573_MOESM1_ESM.pdf]

# Reversible covalent c-Jun N-terminal kinase inhibitors targeting a specific cysteine by precision-guided Michael-acceptor warheads

Dániel Bálint<sup>1,2,#</sup>, Ádám Levente Póti<sup>3,4,#</sup>, Anita Alexa<sup>3</sup>, Péter Sok<sup>3</sup>, Krisztián Albert<sup>3</sup>, Lili Torda<sup>1</sup>, Dóra Földesi-Nagy<sup>3</sup>, Dániel Csókás<sup>5</sup>, Gábor Turczel<sup>6</sup>, Tímea Imre<sup>7</sup>, Eszter Szarka<sup>3</sup>, Ferenc Fekete<sup>8</sup>, Isabel Bento<sup>9</sup>, Márton Bojtár<sup>10</sup>, Roberta Palkó<sup>1</sup>, Pál Szabó<sup>7</sup>, Katalin Monostory<sup>8</sup>, Imre Pápai<sup>5</sup>, Tibor Soós<sup>1,&</sup>, Attila Reményi<sup>3,&</sup>

<sup>1</sup> Organocatalysis Research Group, Institute of Organic Chemistry, Research Centre for Natural Sciences, 1117 Budapest, Hungary

<sup>2</sup> Hevesy György PhD School of Chemistry, Eötvös Loránd University, 1117 Budapest, Hungary

<sup>3</sup> Biomolecular Interaction Research Group, Institute of Organic Chemistry, Research Centre for Natural Sciences, 1117 Budapest, Hungary

<sup>4</sup> Doctoral School of Biology, Eötvös Loránd University, 1117 Budapest, Hungary

<sup>5</sup> Theoretical Chemistry Research Group, Institute of Organic Chemistry, Research Centre for Natural Sciences, 1117 Budapest, Hungary

<sup>6</sup> NMR Research Laboratory, Centre for Structural Science, Research Centre for Natural Sciences, 1117 Budapest, Hungary

<sup>7</sup> MS Metabolomic Research Laboratory, Centre for Structural Science, Institute of Molecular Life Sciences, Research Centre for Natural Sciences, 1117 Budapest, Hungary

<sup>8</sup> Metabolic Drug-interactions Research Group, Research Centre for Natural Sciences, 1117 Budapest, Hungary

<sup>9</sup> European Molecular Biology Laboratory, EMBL, Hamburg, Germany

<sup>10</sup> Chemical Biology Research Group, Institute of Organic Chemistry, Research Centre for Natural Sciences, 1117 Budapest, Hungary

# Equal contribution

& Corresponding authors: [soos.tibor@ttk.hu](mailto:soos.tibor@ttk.hu) & [remenyi.attila@ttk.hu](mailto:remenyi.attila@ttk.hu)

## Supplementary Material

|                                                                       |          |
|-----------------------------------------------------------------------|----------|
| Supplementary Figure 1-15                                             | p2-17    |
| Supplementary Table 1-4                                               | p18-21   |
| Supplementary Note 1 (on the topographic steric map calculations )    | p22-28   |
| Supplementary Note 2 (on the NMR of the BME-1aR-IN-8 adduct)          | p29      |
| Supplementary Note 3 (on the LC-MS analysis for the PK measurements ) | p30-31   |
| Supplementary Note 4 (on the synthesis of compounds)                  | p32-145  |
| Supplementary References                                              | p146-147 |

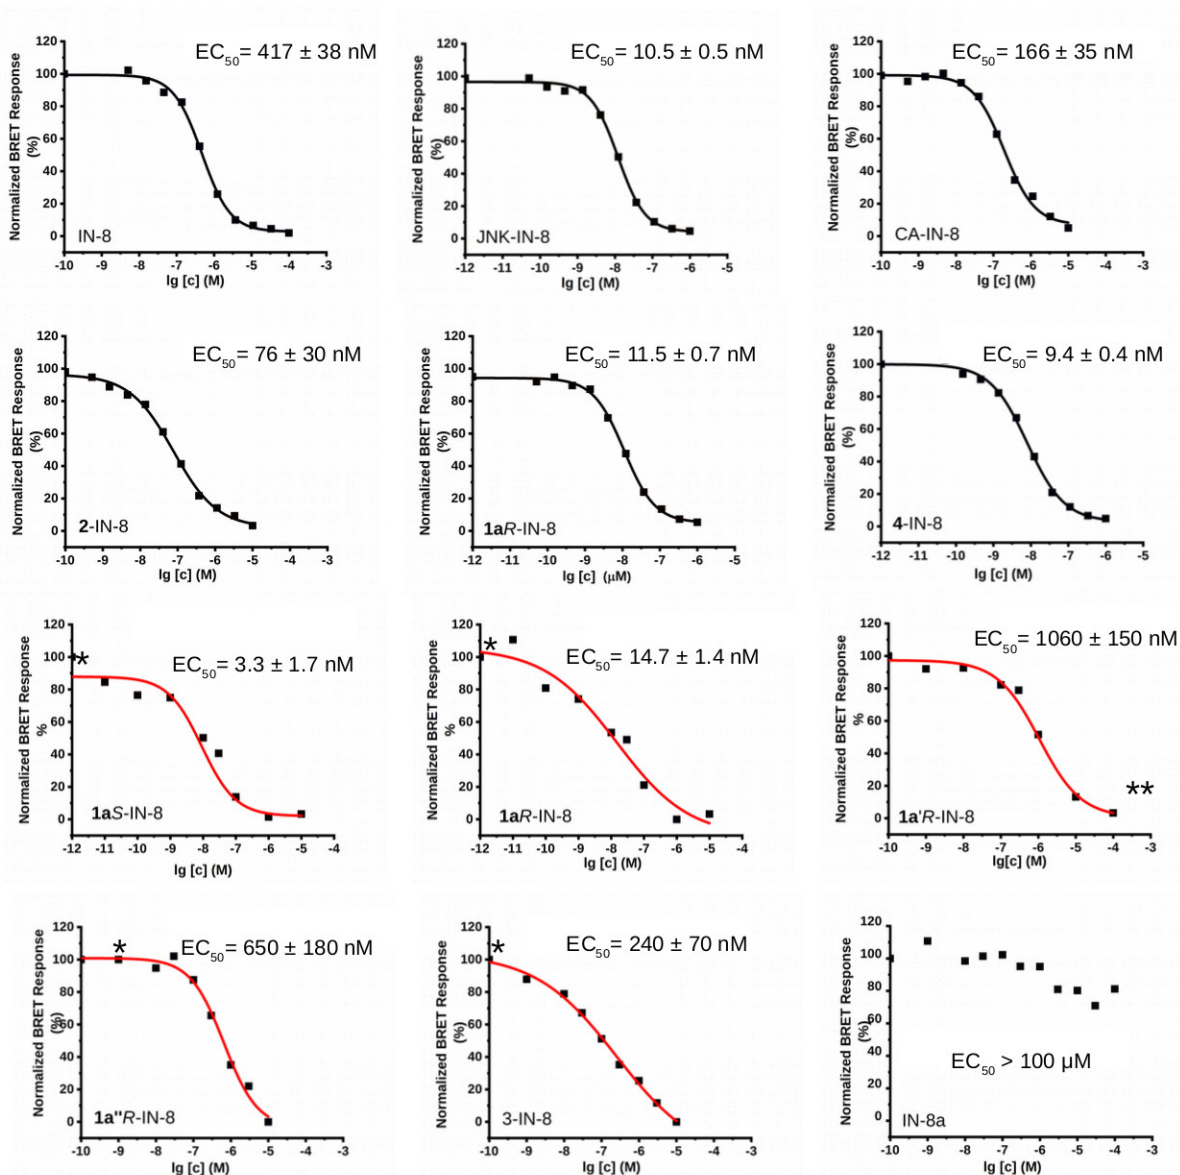

### Supplementary Figure 1. NanoBRET target engagement assays

Panels show results of the NanoBRET target engagement assay measured by Reaction Biology (USA) (first 6 panels) or by own experiments (last 6 panels) using the same methodology. Duplicate measurements, data show the mean value.  $EC_{50}$  values show the mean and the parameter error estimate from weighted least squares method (\* denotes a data point with only DMSO added and \*\* denotes a data point with no tracer added, background). Note that the two panels in the middle contain measurements for the same compound (**1aR-IN-8**) determined by Reaction Biology Corp., as a service provider, or by an own experiment, and both measurement gave a similar  $EC_{50}$  value. IN-8a repeatedly gave very weak target engagement with the Nanoluc-JNK1 construct, in contrast to IN-8. This may be due the extended *N*-acetyl group in the former compound compared to the latter's amine next to the ATP-binding moiety (see Table 1). Source data are provided as a source Date file.

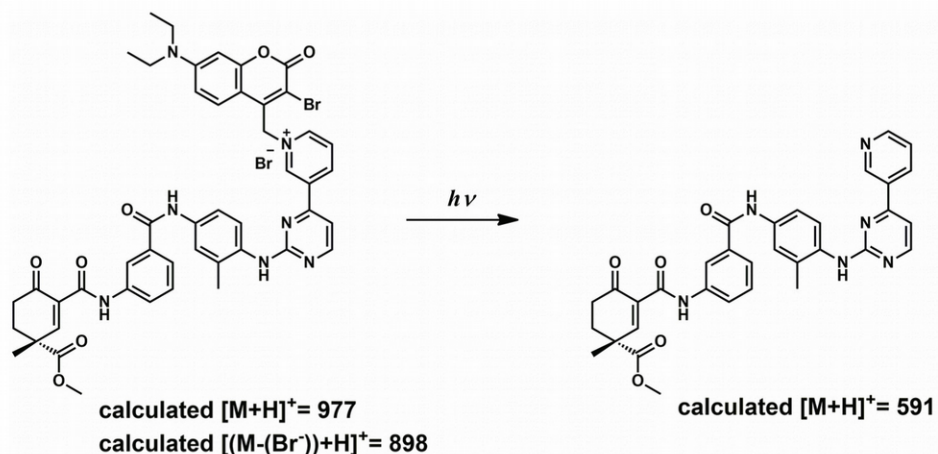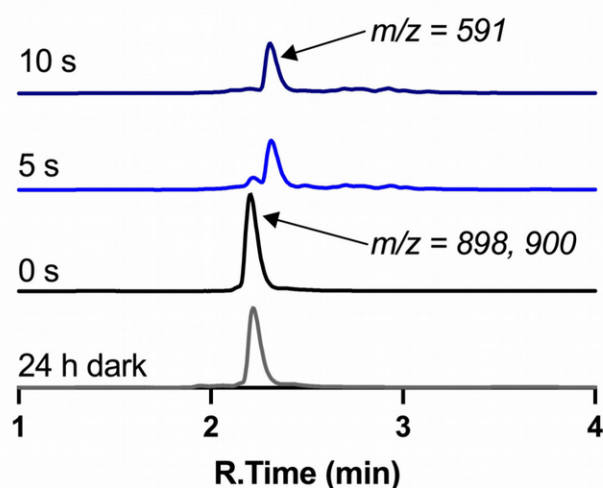

### Supplementary Figure 2. Uncaging of Photocaged 1aR-IN-8 in vitro

Partial LC-MS chromatograms at 254 nm of the photo-uncaging of Photocaged **1aR-IN-8** (0.1 mM in water-MeCN 95:5) upon blue light irradiation (450 nm). Note that the compound contains one covalently linked Br but it is also complexed to Br<sup>-</sup> and the molecular mass of the Photocaged **1aR-IN-8** compound without the bromide ion is 898 (and a mass of 900 corresponds to the compound with the heavier natural Br isotope).

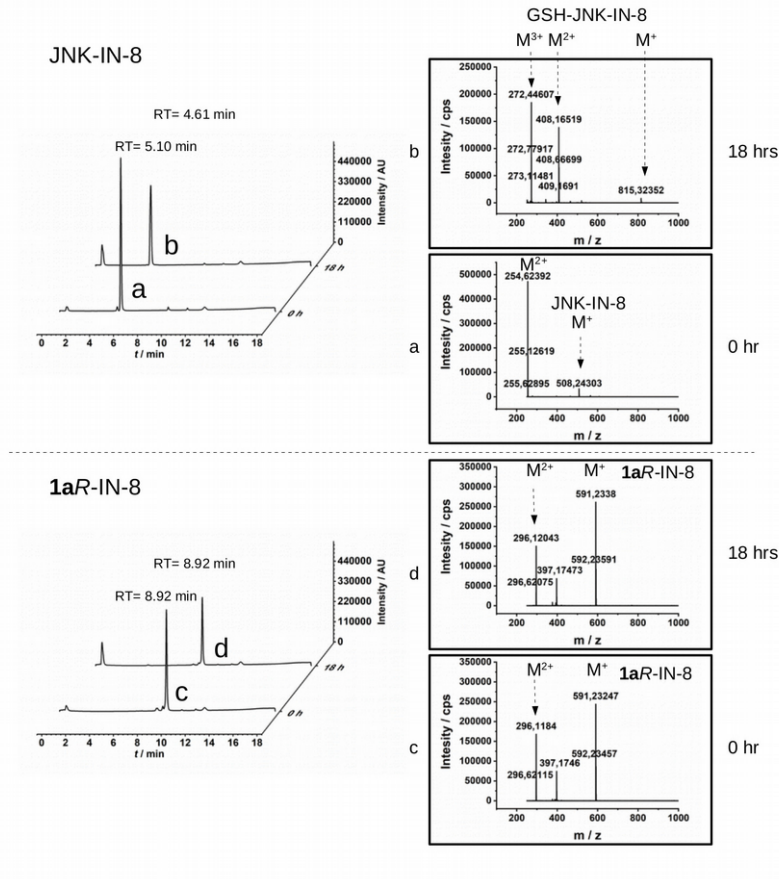

Detection of the GSH-**1aR**-IN-8 adduct with a shorter LC step

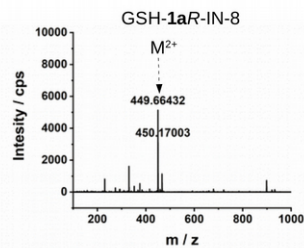

### Supplementary Figure 3. Electrospray mass spectrometric characterization of JNK-IN-8 and **1aR**-IN-8 incubated with 10 mM GSH

The GSH-adduct formation is apparent in the different elution profile in the total ion-chromatograms for JNK-IN-8 incubated with GSH for 18 hours versus no incubation (0 hr) as well as in the corresponding mass spectra (RT: retention time; M<sup>+</sup>, M<sup>2+</sup>, M<sup>3+</sup> indicate the mass of differently charged molecular ions). The GSH-**1aR**-IN-8 adduct could not be detected with this method that worked well for the GSH-JNK-IN-8 adduct, however after shortening the HPLC separation time, using a shorter (guard) column, the GSH-**1aR**-IN-8 adduct also became detectable. These results suggest that **1aR**-IN-8 does not form an irreversible GSH adduct; and the reversible adduct is short-lived. 50  $\mu$ M compound was incubated with 10 mM GSH in PBS (pH  $\sim$  7.4) for 30 minutes before subjected to this shorter LC-MS analysis.

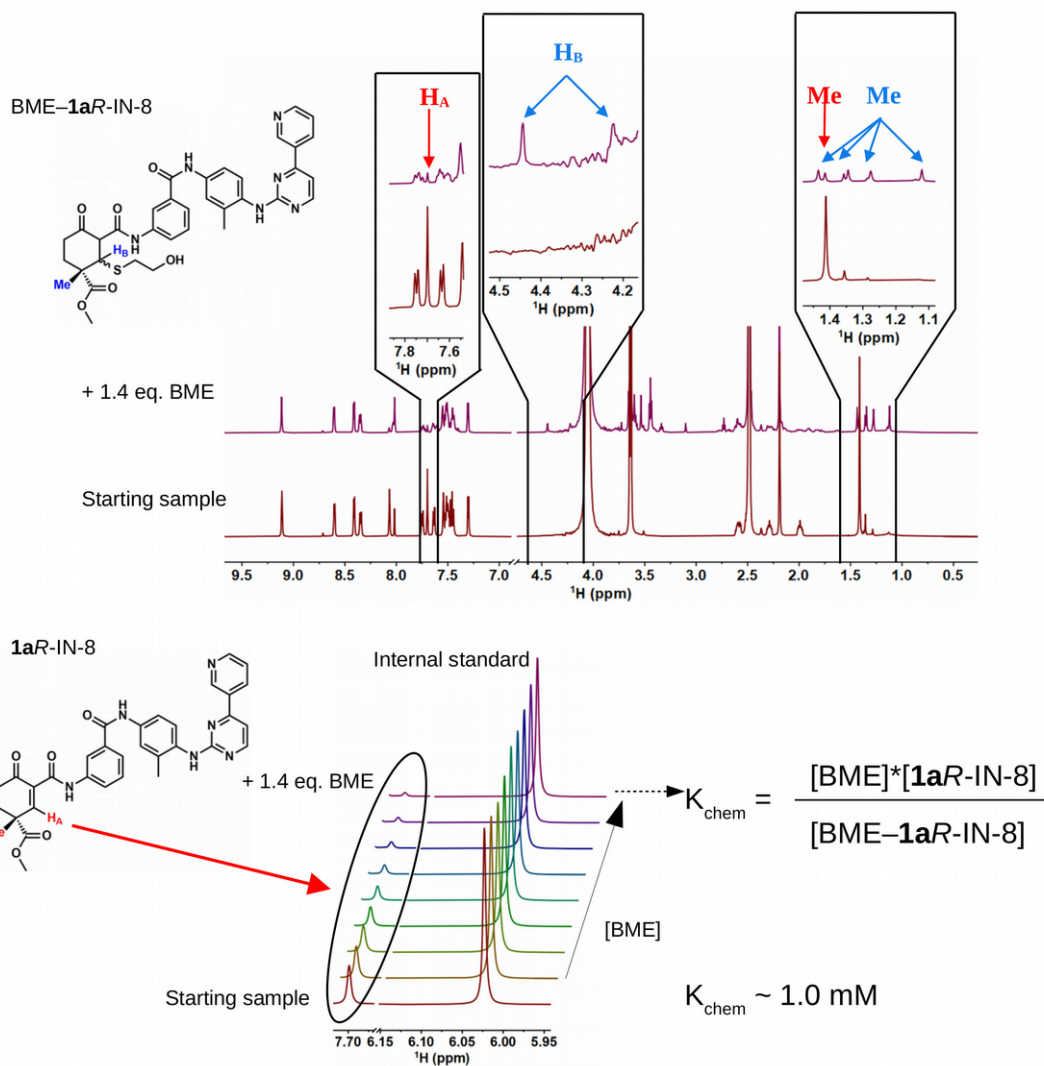

### Supplementary Figure 4. NMR analysis of covalent adduct formation between **1aR-IN-8** and **BME** and $K_{\text{chem}}$ calculation

The structure of the BME-**1aR-IN-8** adduct or **1aR-IN-8** highlights  $H_B$  or  $H_A$  at C3 and the methyl group at C4 showing changes in the  $^1\text{H}$  NMR spectra. Upper panels show the spectra of the initial **1aR-IN-8** sample (13.1 mM) and after mixing it with 1.4 molar equivalent BME. Lower panels show the results of the  $^1\text{H}$  NMR titration experiment where increasing amounts of BME was added to the starting **1aR-IN-8** sample.  $^1\text{H}$  NMR spectra were recorded in PBS ( $\text{D}_2\text{O}$ ; pH  $\sim$  7.2) with 75% DMSO. The position of the 6.02 ppm protons from the reference compound was used as the internal standard important to be able to calculate  $K_{\text{chem}}$  (see Supplementary Note 2). The  $K_{\text{chem}}$  value was calculated from the concentration of the relevant components (taken from the +1.4 eq. BME spectrum), assuming that the system reached equilibrium and the decrease of the  $H_A$  signal directly correlates with adduct formation (albeit the corresponding peaks for the products could not be monitored due to being at overlapping positions).

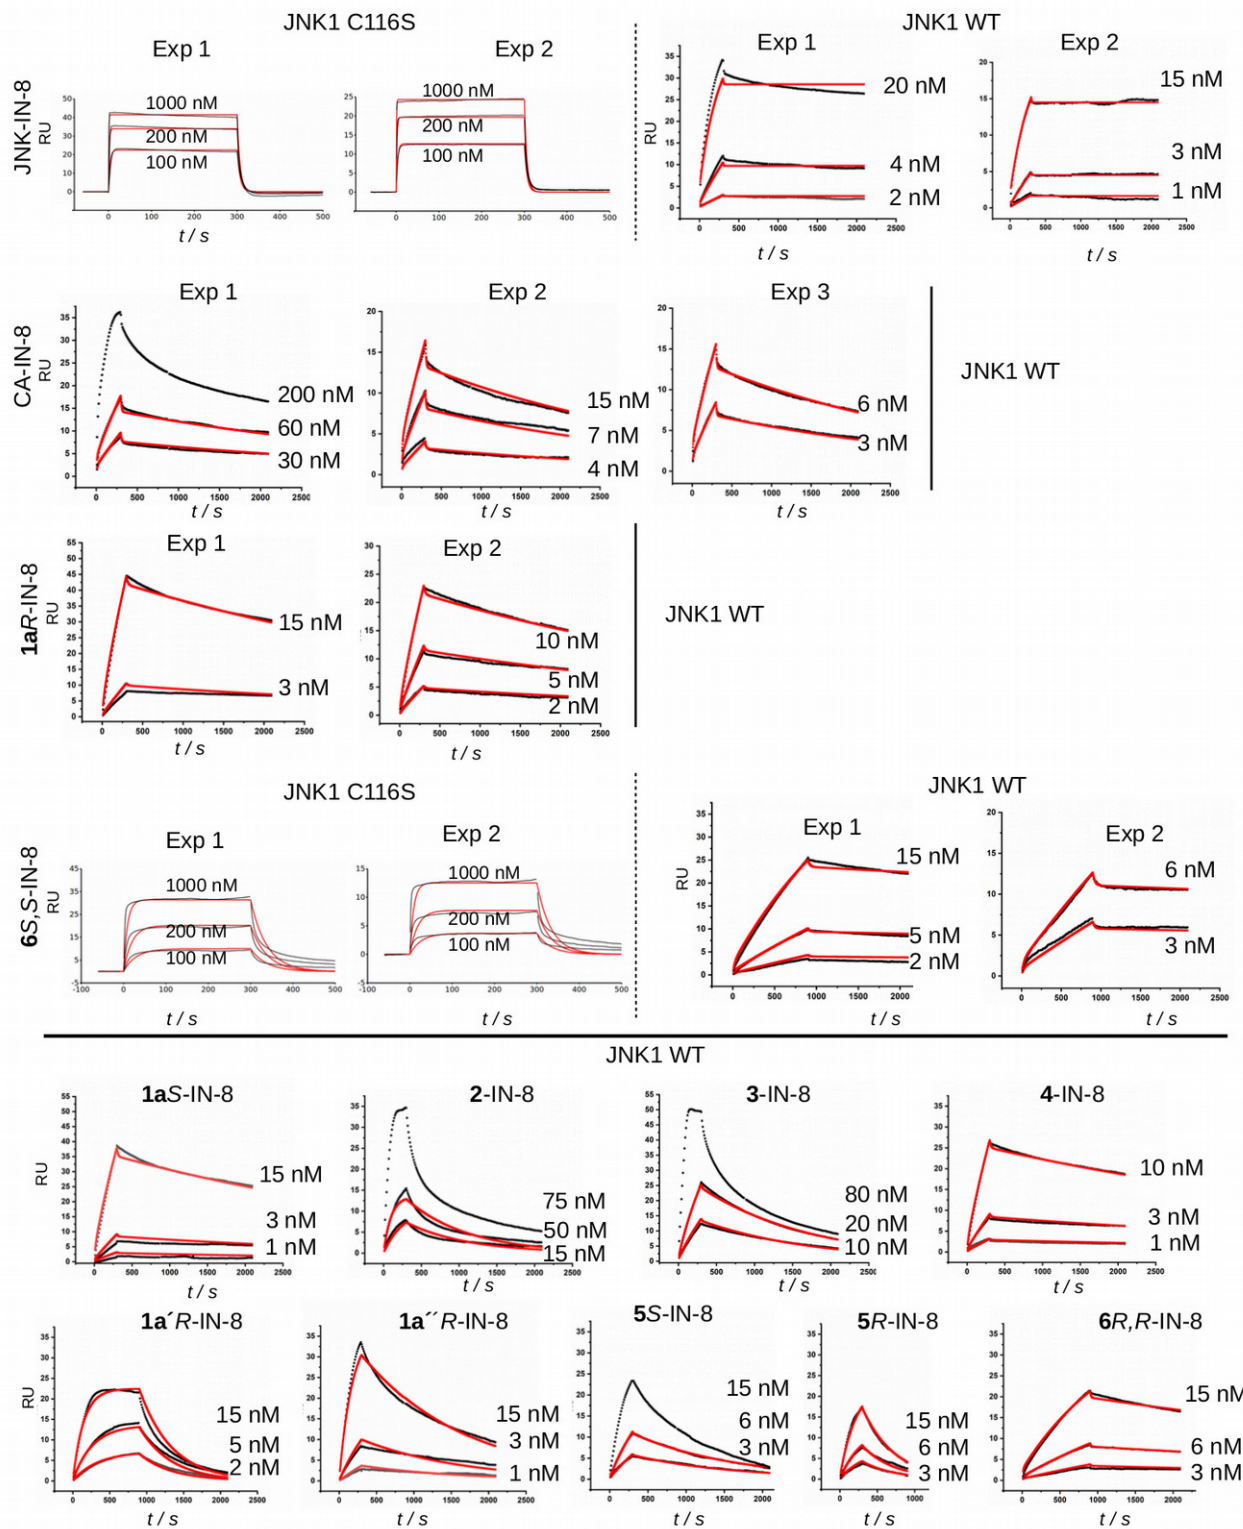

**Supplementary Figure 5. SPR kinetic binding curves of different inhibitors targeting Cys116 in JNK1 including parallel experiments**

The experimental kinetic binding curves are shown in black, and the calculated plots (in red) are based on a 2-step reversible kinetic binding scheme (see Fig. 3) with the final  $k_{1-4}$  values listed in Supplementary Table 1 (experiment 1, Exp 1). (For some of the compounds with fast on-rates the kinetic binding curve corresponding to the highest inhibitor concentration injection was not used in the numerical fit.) One or two additional measurements was also carried out with JNK-IN-8, CA-IN-8, **1aR**-IN-8, and **6S,S**-IN-8 (in addition to Exp1 to assess precision: Exp2 and Exp3). One extra experiment was also carried out for JNK-IN-8 and **6S,S**-IN-8 on the JNK1 C116S surface (shown left of the dashed lines), in addition to the JNK1 WT surface. The comparison of the  $k_{1-4}$  values determined in Exp2 and Exp3 are listed in the Methods with some discussion about precision and on caveats of this complex analysis. Note that the Response Units (RU) on the SPR sensorgrams may differ because the JNK1 immobilization level on the chip varied, and this was intentionally made different (within a reasonable range) in parallel experiments.

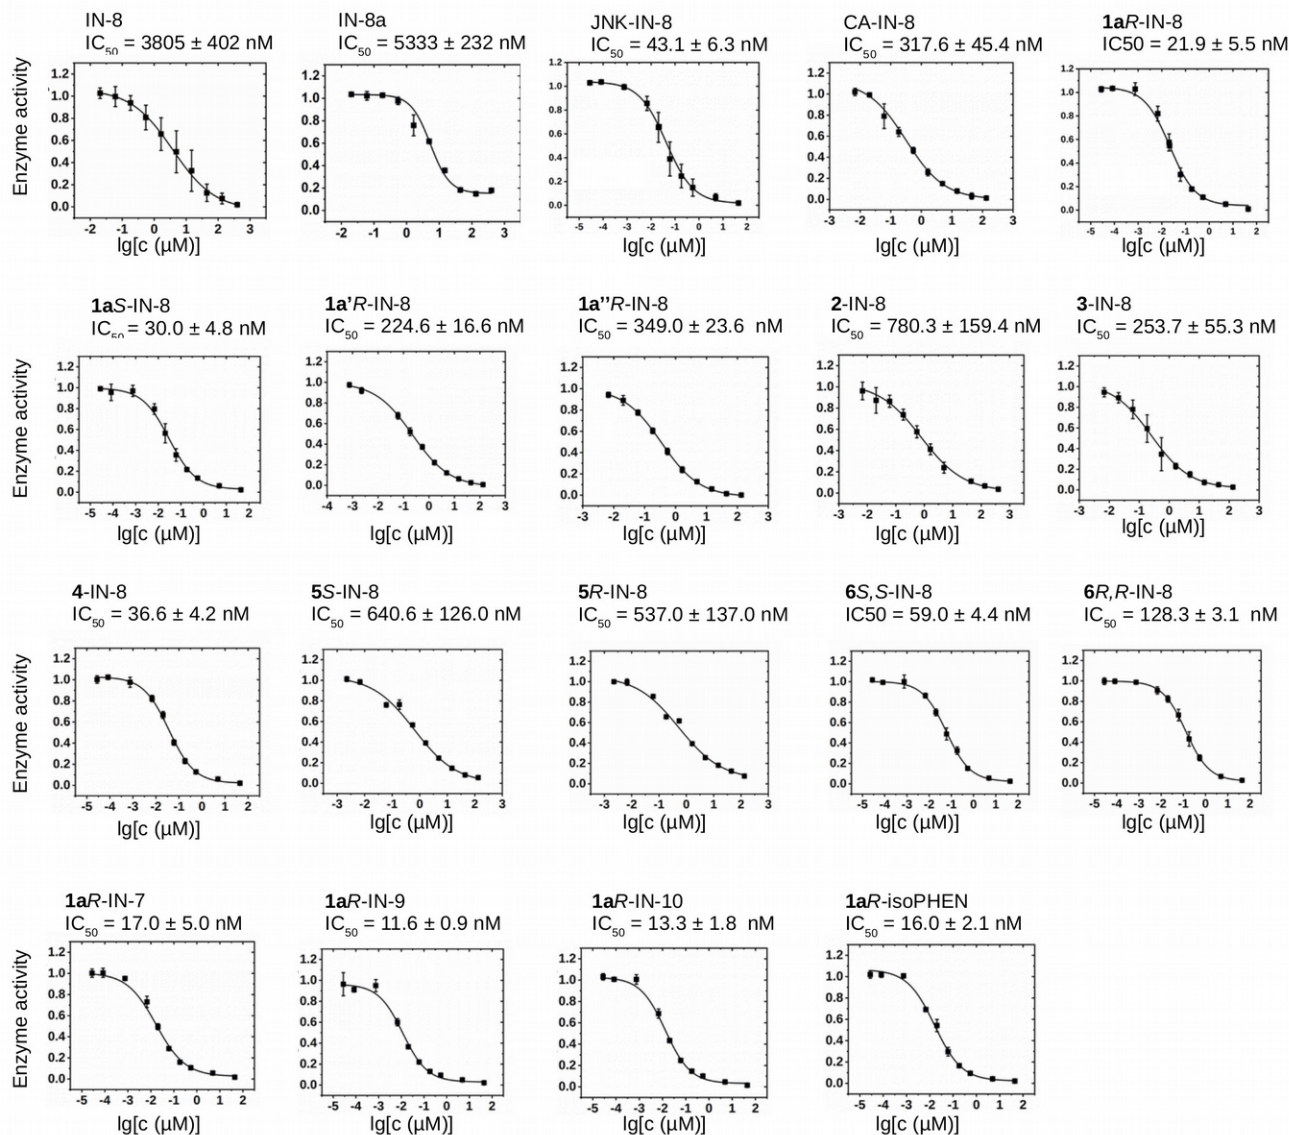

**Supplementary Figure 6. In vitro kinase activity measurements with the PhALC assay**

Panels show PhALC assay results with JNK1 in the presence of 10 mM GSH. Data show the mean and error bars show SD (n=3; independent experiments). IC<sub>50</sub> values show the mean with parameter error estimates from weighted least squares method. Source data are provided as a source Date file.



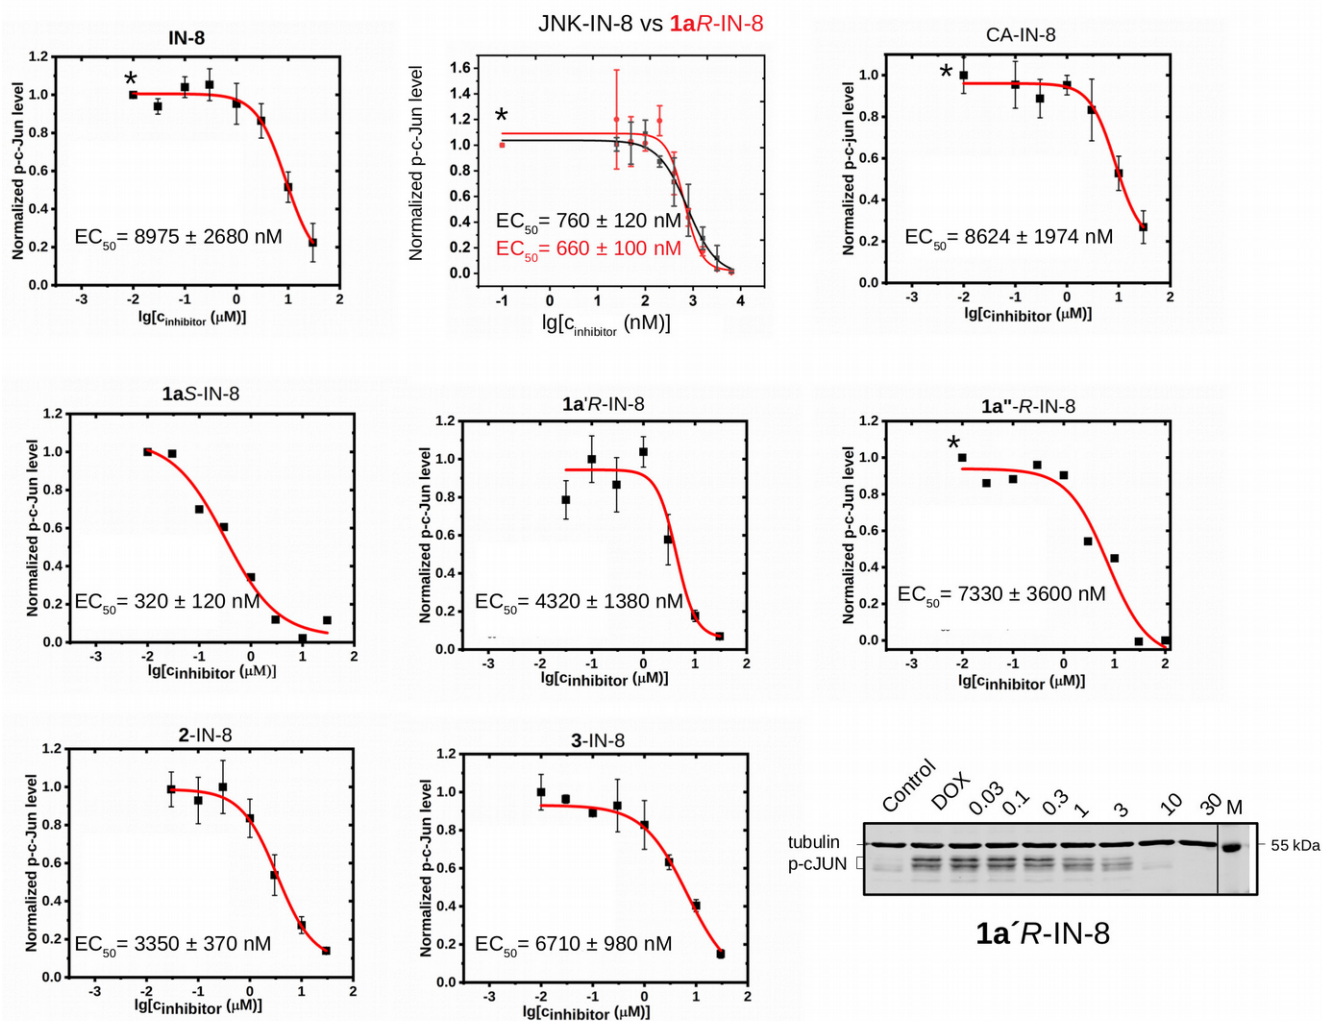

### Supplementary Figure 7. p-c-Jun IC<sub>50</sub> measurements by quantitative western blots

EC<sub>50</sub> of compounds on JNK mediated c-Jun(Ser73) phosphorylation in doxycycline stimulated SH-SY5Y MKK7 ACT cells after 6 hours (n=3; data show the mean and error bars show SD calculated based on three independent measurements; but n=1 for **1aS-IN-8** and **1a''R-IN-8**). The phosphorylation of c-Jun was determined by using quantitative western blots using a phospho-c-Jun specific(Ser73) antibody. This WB signal was divided by the WB signal of the load control (anti-tubulin), and this corrected WB signal was normalized to the phospho-c-Jun signal measured in cells that were not treated by any inhibitor but induced by doxycycline (DOX) (and an example of the raw WB for **1a'R-IN-8** is shown in the last panel; "Control": no DOX stimulation; 0.03-30 μM compound were added with DOX; see Source data for the other western blots). EC<sub>50</sub> values show the mean with parameter error estimates from weighted least squares method or the EC<sub>50</sub> based on one measurement with error parameter estimate from least squares method. "\*" denotes values obtained with DOX but untreated with any inhibitor. Source data are provided as a source Data file.

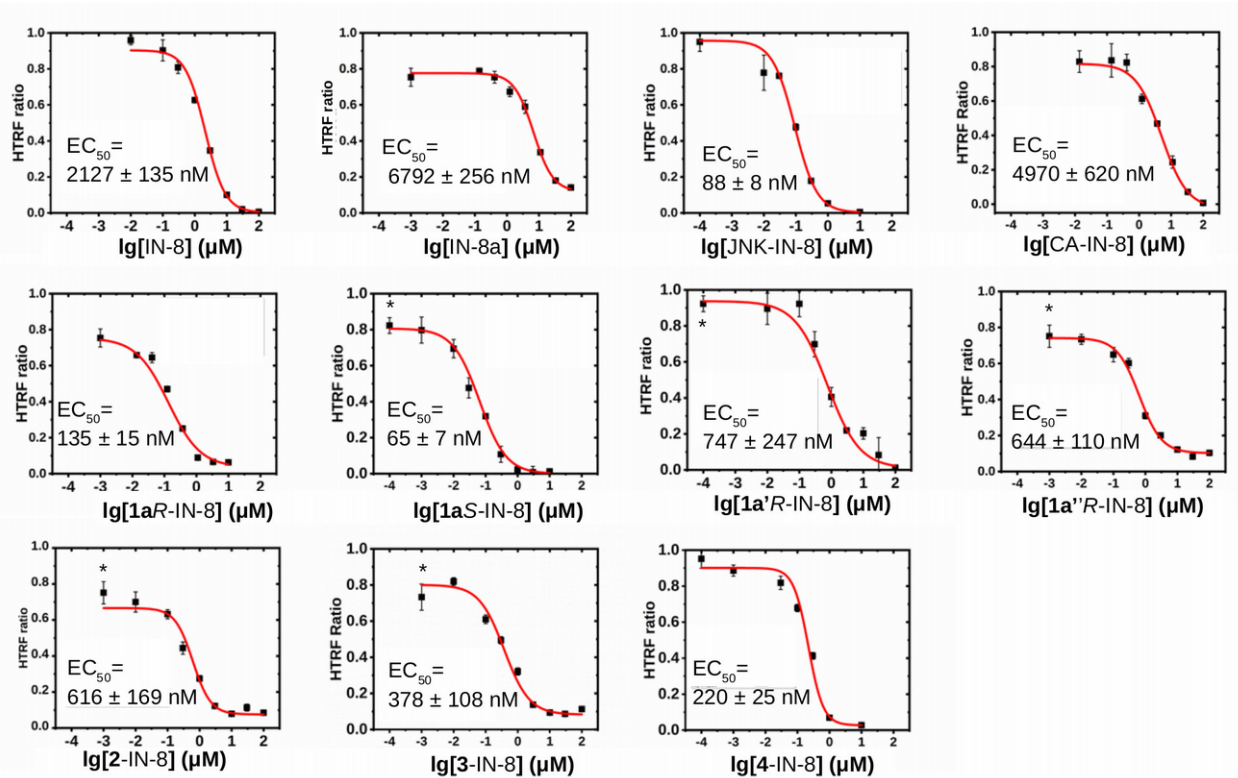

### Supplementary Figure 8. Results of the HTRF p-c-Jun(Ser63) assay

SH-SY5Y MKK7 ACT cells allowing specific activation of JNK. For the determination of JNK inhibitor mediated c-Jun phosphorylation, cells were stimulated with 3 μg/mL doxycycline (DOX), co-administered with different amounts of inhibitors, and samples were subjected to HTRF ratio measurements using the HTRF Phospho-c-Jun(Ser63) Detection Kit (PerkinElmer) after 6 hours. EC<sub>50</sub> values show the mean and the error indicates the parameter estimate from weighted least squares method (n=3, independent experiments; data show the mean and error bars show SD). \* indicates control with only DMSO added (and this point is artificially set to correspond to an inhibitor concentration of 1 nM). Source data are provided as a source Date file.

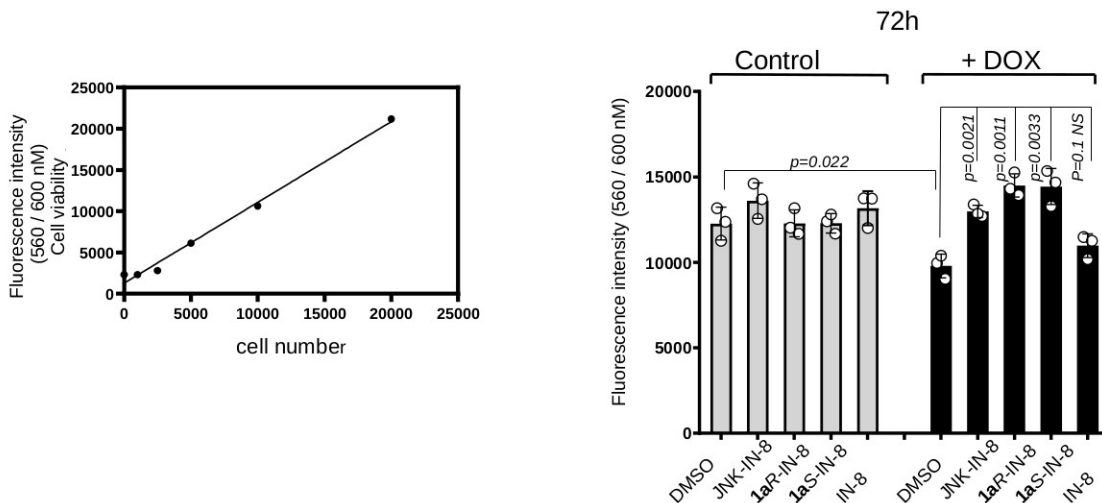

### Supplementary Figure 9. Cell survival of SH-SY5Y MKK7 ACT cells

Cell viability was measured by monitoring the reducing power of living cells. The latter is a cell health indicator and can be monitored by fluorescence intensity measurements after addition of a resazurin-based solution (PrestoBlue). The left panel shows the linearity of the fluorescence signal with the cell number of untreated SH-SY5Y MKK7 ACT cells (data show the mean value). The right panel shows the results of an experiment where cells were uninduced (Control) or induced with doxycycline (+DOX) and treated with no inhibitor (DMSO) or with different inhibitors in 1  $\mu$ M concentration. Cell viability was measured 72 hours after doxycycline and inhibitor co-administration. Notice that doxycycline treatment reduces cell viability but cells are well-protected by composite inhibitors containing covalent warheads (JNK-IN-8, **1aR**-IN-8, or **1aS**-IN-8). (Data show the mean and error bars show SD, n=3; p-values were calculated based on two-sided, unpaired t-test; NS: not significant,  $p > 0.05$ .) Source data are provided as a source Date file.

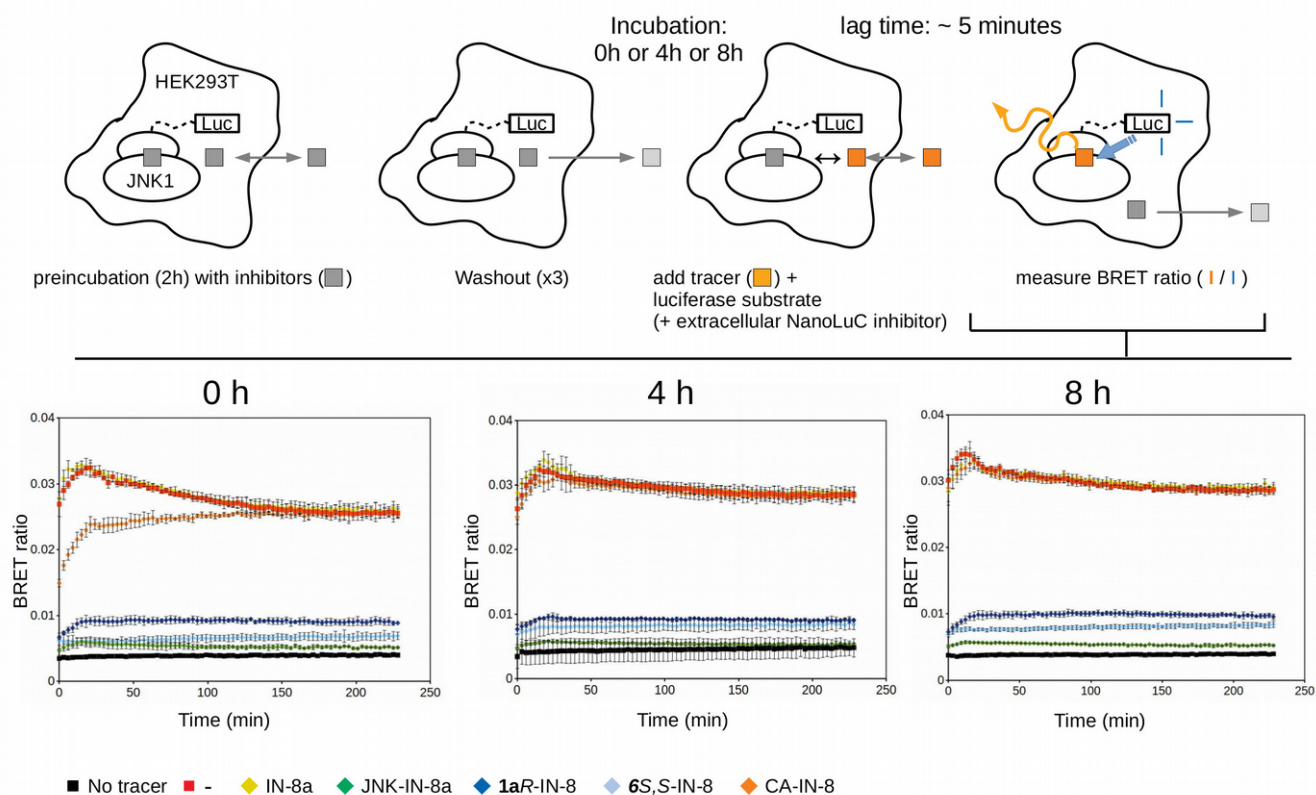

**Supplementary Figure 10. Details of cellular wash-out experiments monitored by nanoBRET**  
 HEK293T cells were transfected with the NanoLuc-JNK1 expression plasmid (not shown), preincubated with the inhibitors for 2 hours, washed out 3 times and incubated without inhibitor for 0, 4 or 8 hours before adding the fluorescent tracer (0.4  $\mu$ M K10) and luciferase substrate (along with the extracellular NanoLuc inhibitor to block potential extracellular luciferase activity), and the BRET ratio was measured for 4 hours. Note that the lag time of the measurement after the addition of the tracer compound binding into the JNK1 ATP-pocket is about 5 minutes. The panels below show the raw data of the BRET ratio measurements (emission at 650 nm / emission at 450 nm; n=3; data show the mean and error bars show SD). The BRET ratio values on Fig 4.d were taken from the 0 time point shown at each panel. (The upward trend of the BRET ratio plot up to  $\sim$  15 minutes may indicate that the tracer needs some time to reach its equilibrium level in the JNK1 ATP pocket, while the slight decrease for samples with high BRET ratio may reflect some degree of luciferase substrate depletion by time.)

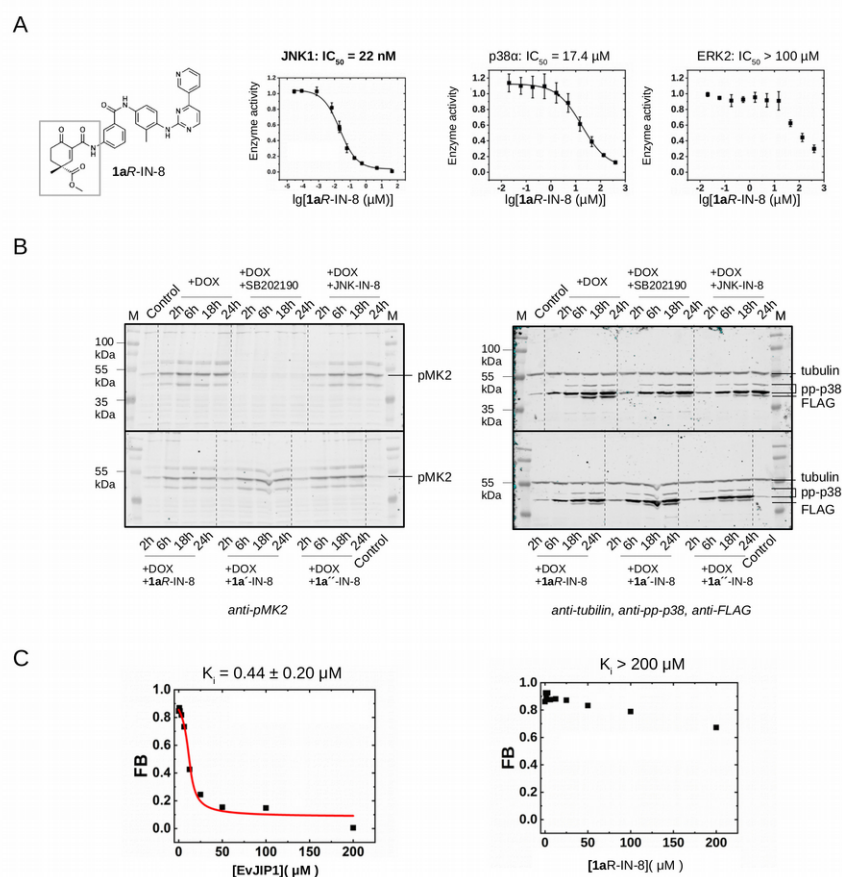

### Supplementary Figure 11. MAPK specificity of composite JNK inhibitors

(A) JNK specificity of **1aR-IN-8** in comparison to ERK2 and p38 $\alpha$  in the PhALC assay (n=3, independent experiments; Data show the mean and error bars show SD.)

(B) JNK inhibitors do not affect the p38 MAPK pathway. HEK293T MKK6EE cells (allowing p38-specific activation by doxycycline inducible expression of the constitutively active upstream activator kinase, MKK6EE, with a FLAG-tag) were stimulated for the indicated time by doxycycline (DOX) and cells were simultaneously treated with SB202190 (1  $\mu$ M), a known p38-specific ATP competitive inhibitor, or with different JNK inhibitors (3  $\mu$ M). The panel on the left shows the western blot results with a phospho-MK2-specific antibody, while the panel on the right shows the western blot results using three antibodies (anti-tubulin – as the load control, anti-pp-p38 – recognizing the activated form of p38 kinases, and anti-FLAG – monitoring the expression level of MKK6EE-FLAG). MK2, also known as MAPKAPK2, is a specific substrate of p38.

(C) **1aR-IN-8** does not interfere with docking peptide (EvJIP1) binding. A fluorescence polarization-based protein-peptide binding assay was used to detect the binding of the fluorescently labeled EvJIP1 peptide in the MAPK docking groove harboring Cys163 (FB: fraction bound). The panel on the left shows how the unlabeled EvJIP1 peptide competes the labeled peptide off, and the panel on the right shows that the inhibitor does not interfere with docking motif binding, and hence does not target Cys163 located in the MAPK docking groove. The measurements were taken  $\sim$  30 minutes after all components were added. Data show the mean value based on three independent experiments (n=3). Source data are provided as a source Date file.

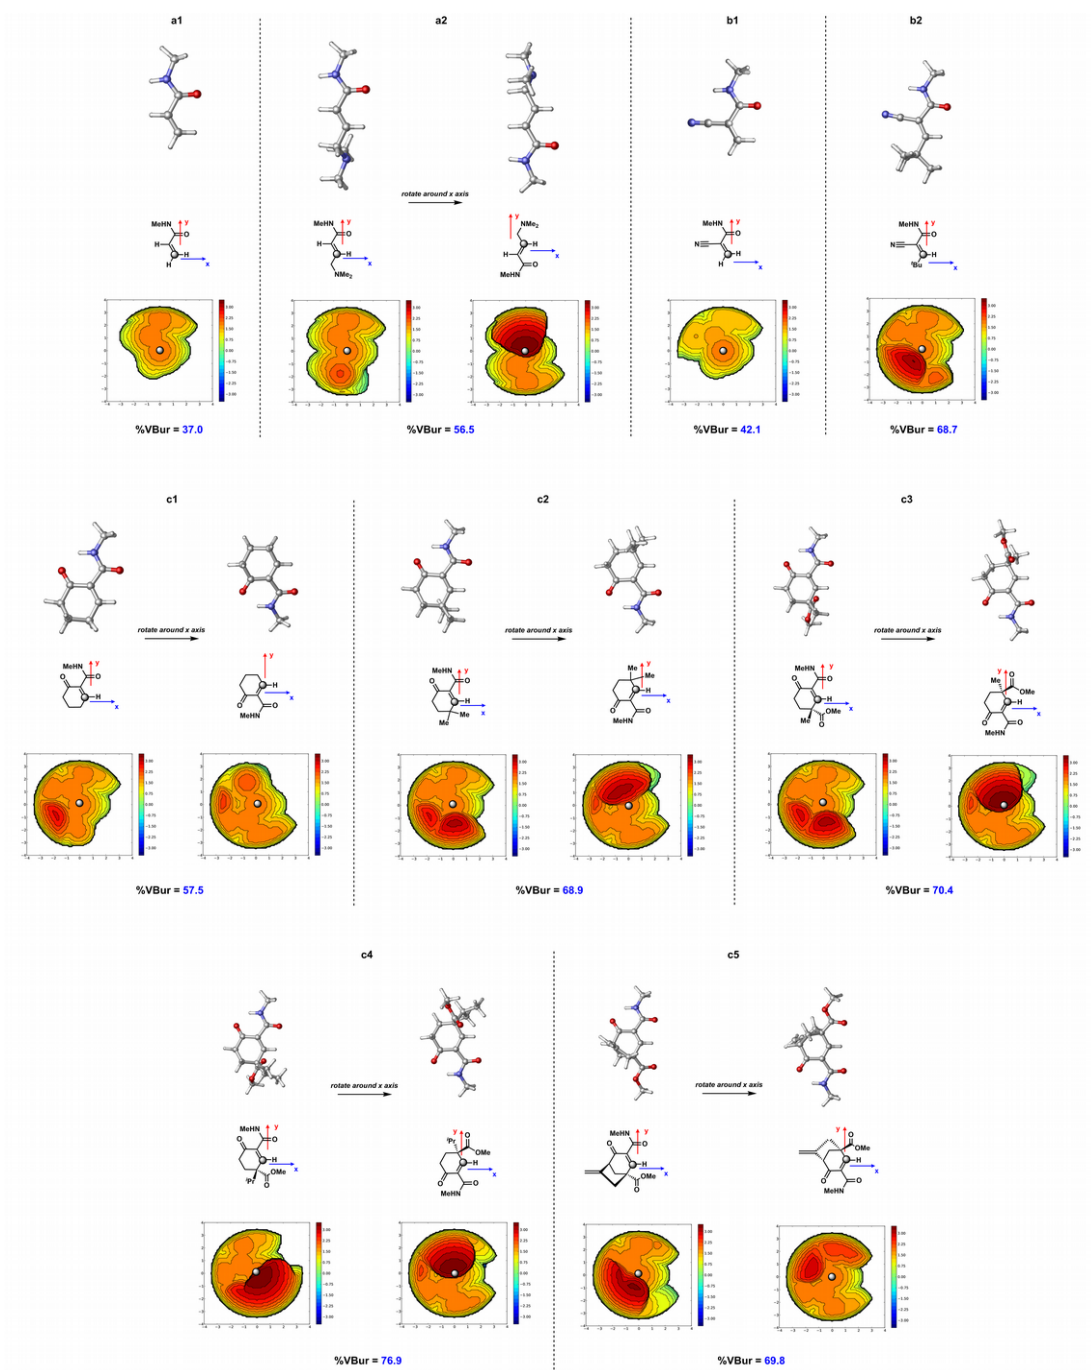

### Supplementary Figure 12. More complete topographic steric maps of simplified warheads and buried volume calculation (%Vbur)

Steric maps are derived from the DFT-optimized structures (see Supplementary Note 1). The isocontour scheme is in Å, and a coloring scheme from dark red to deep blue is used to display sterically encumbered regions around the reactive center. The grey dot shown at the center of the xy plane represents the reactive carbon atom in the Michael acceptor, and the steric map is viewed down the z-axis. Comparison of the steric maps of the simplified warheads indicates that the establishment of the cyclic form and incorporation of pendant groups notably increase the steric congestion near the reactive center.

|        |                                                                |     |
|--------|----------------------------------------------------------------|-----|
| JNK2a2 | -----MSDSKCDSQFYSVQVADSTFTV                                    | 22  |
| JNK1b1 | -----MSRSKRDNNFYSVEIGDSTFTV                                    | 22  |
| JNK3a1 | MSLHFLYYCSEPTLDVKIAFCQGFQVDSYIAKHYNMSSKSKVDNQFYSVVEVDSTFTV     | 60  |
|        | * * * * * : * * * * * : * * * * *                              |     |
| JNK2a2 | LKRYQQLKPIGSGAQGIVCAAFDTVLGINVAVKKLSRPFQNTTHAKRAYRELVLKCVNH    | 82  |
| JNK1b1 | LKRYQNLKPIGSGAQGIVCAAYDAILERNVAIKKLSRPFQNTTHAKRAYRELVLKCVNH    | 82  |
| JNK3a1 | LKRYQNLKPIGSGAQGIVCAAYDAVLDNRNVAIKKLSRPFQNTTHAKRAYRELVLKCVNH   | 120 |
|        | * * * * * : * * * * * : * * * * *                              |     |
| JNK2a2 | KNIISLLNVFTPQKTEEFQDVYLVLMELMDANLCQVIHMELDHERMSYLLYQMLCGIKHL   | 142 |
| JNK1b1 | KNIIGLLNVFTPQKSLLEEFQDVYIVMELMDANLCQVIQMELDHERMSYLLYQMLCGIKHL  | 142 |
| JNK3a1 | KNIISLLNVFTPQKTEEFQDVYLVLMELMDANLCQVIQMELDHERMSYLLYQMLCGIKHL   | 180 |
|        | * * * * * : * * * * * : * * * * *                              |     |
| JNK2a2 | HSAGIIHRDLKPSNIVVKS DCTLKILDFGLARTACTNFMMPYVTRYRRAPEVILGMGY    | 202 |
| JNK1b1 | HSAGIIHRDLKPSNIVVKS DCTLKILDFGLARTAGTSFMMTPYVTRYRRAPEVILGMGY   | 202 |
| JNK3a1 | HSAGIIHRDLKPSNIVVKS DCTLKILDFGLARTAGTSFMMTPYVTRYRRAPEVILGMGY   | 240 |
|        | * * * * * : * * * * * : * * * * *                              |     |
| JNK2a2 | KENVDIWSVGCIMGELVKGCVIFQGTDLIDQWNKVEQLGTPSAEFMKKLQPTVRNYVEN    | 262 |
| JNK1b1 | KENVDIWSVGCIMGEMIKGGVLFPGTDHLDQWNKVEQLGTPCEPFMKKLQPTVRTYVEN    | 262 |
| JNK3a1 | KENVDIWSVGCIMGEMVRHKILFPGRDYLDQWNKVEQLGTPCEPFMKKLQPTVRNYVEN    | 300 |
|        | * * * * * : * * * * * : * * * * *                              |     |
| JNK2a1 | RPKYPGIKFEELFPDWIFPSESERDKIKTSQARDLLSKMLVIDPDKRISVDEALRHPYIT   | 322 |
| JNK1b1 | RPKYAGYSFEKLFDPVLF PADSEHNK LKASQARDLLSKMLVIDASKRISVDEALQHPYIN | 322 |
| JNK3a1 | RPKYAGLTFPKLFPDSLFPADSEHNK LKASQARDLLSKMLVIDPAKRISVDDALQHPYIN  | 360 |
|        | * * * * * : * * * * * : * * * * *                              |     |
| JNK2a2 | VWYDPAEAEAPPPQIYDAQLEEREHAIEEWKELIYKEVMDWEERSKNGVVKDQPSDAAVS   | 382 |
| JNK1b1 | VWYDPSEAEAPPPKIPDKQLDEREHTIEEWKELIYKEVMDLEERTKNGVIRGQPSPLAQV   | 382 |
| JNK3a1 | VWYDPAEVEAPPPQIYDKQLDEREHTIEEWKELIYKEVMNSEEKTKNGVVKGQPSPSAQV   | 420 |
|        | * * * * * : * * * * * : * * * * *                              |     |
| JNK2a2 | SNATPSQSSSINDISSMSTEQT LASD TDSSLDASTGPLEGCR                   | 424 |
| JNK1b1 | QQ-----                                                        | 384 |
| JNK3a1 | QQ-----                                                        | 422 |
|        | : :                                                            |     |

### Supplementary Figure 13. Multiple sequence alignment of human JNK isoforms (JNK1b1, JNK2a2 and JNK3a1)

Residues corresponding to exon 6 are boxed in the sequence alignment below. This short region varies among JNK isoforms and the three residues (GGV in JNK1b1) displaying the greatest variation among the examined JNK isoforms are colored green.

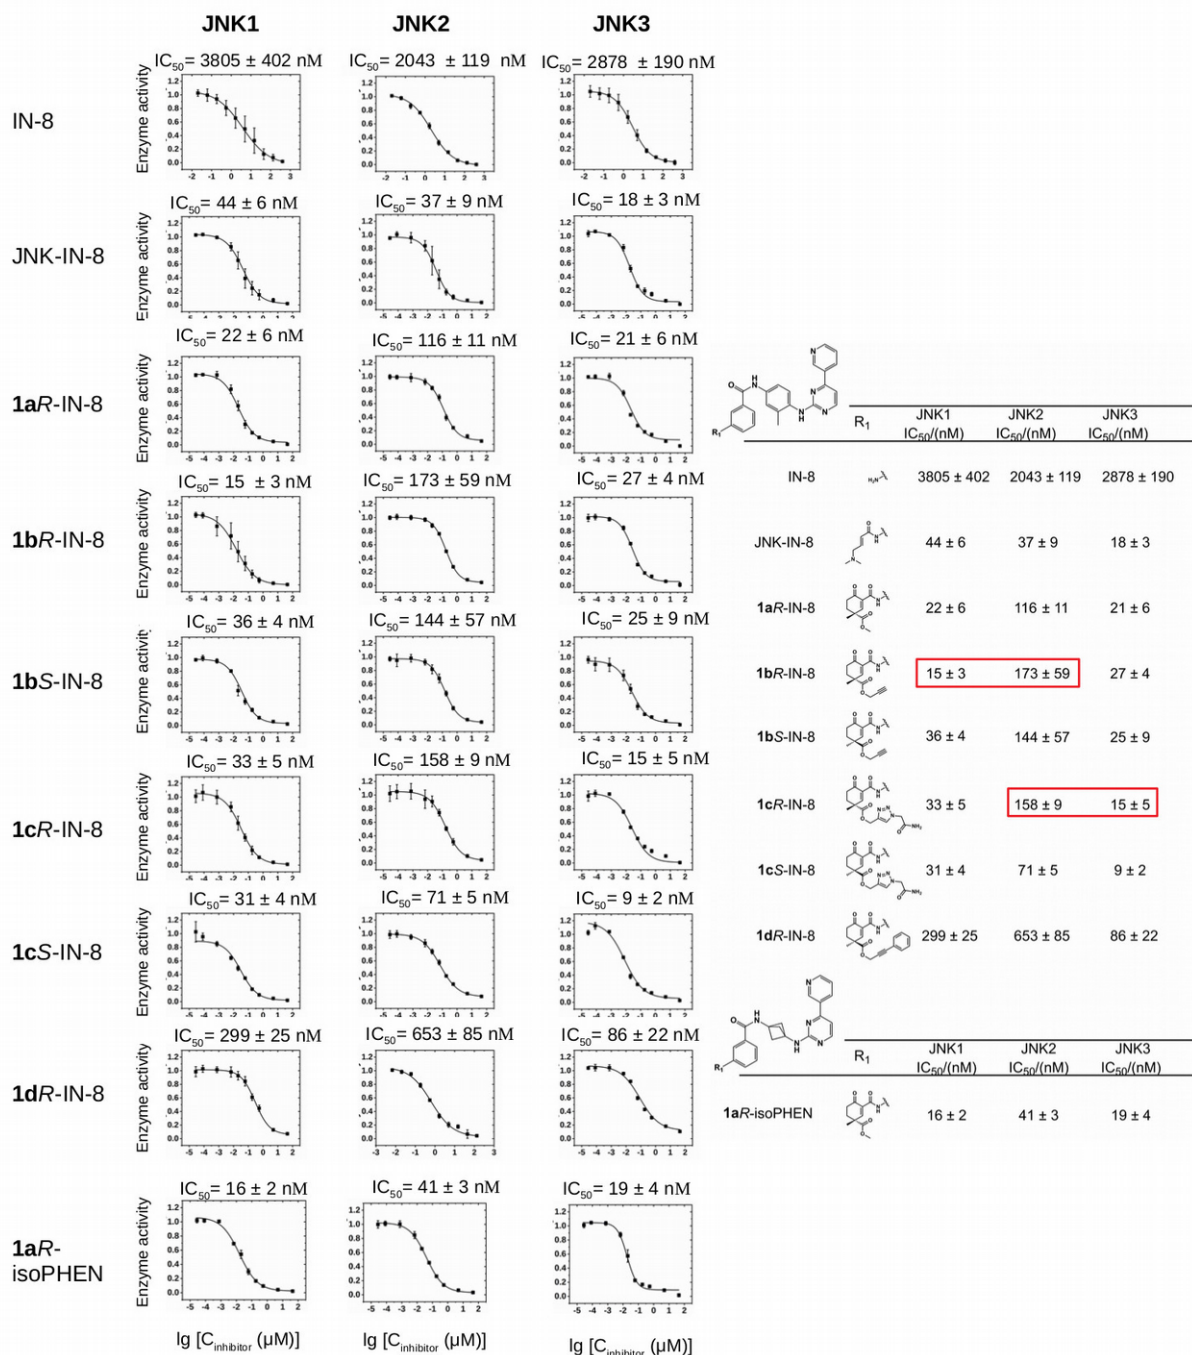

### Supplementary Figure 14. JNK isoform selectivity of cyclohexenone warhead containing JNK inhibitors

Panels show PhALC assay results with JNK1, JNK2 and JNK3 (JNK1b1, JNK2a2 and JNK3a1). Data show the mean and error bars show SD (n=3). IC<sub>50</sub> values show the mean and the parameter estimate from weighted least squares method. The table on the right shows the summary of these measurements, where compounds with >10-fold selectivity for JNK1 vs JNK2 or JNK3 vs JNK2 are boxed in red. Source data are provided as a source Date file.



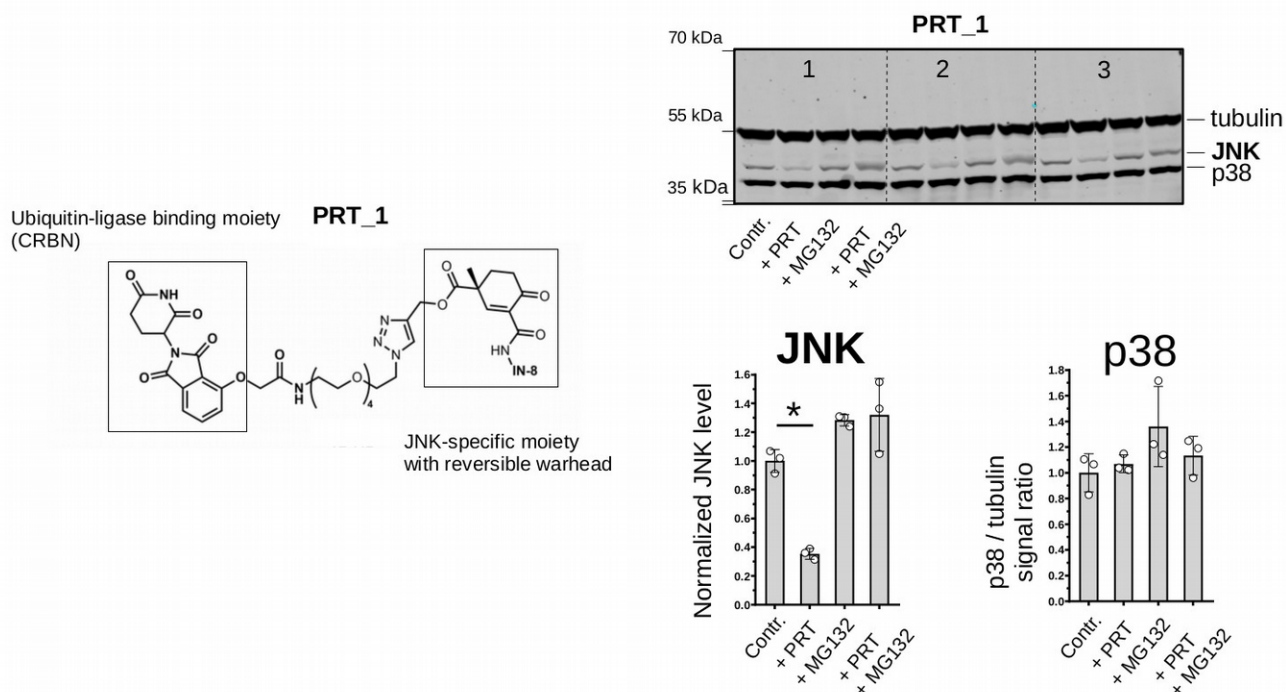

### Supplementary Figure 15. A JNK-specific PROTAC design

A JNK PROTAC comprised of a JNK-specific binding moiety (as in **1aR-IN-8**) and an E3 ubiquitin ligase binding moiety (CRBN) connected by a PEG-based linker. The western blot (WB) panel shows the results of three parallel experiments (n=3; 1,2,3). The levels of JNK1 and p38 were monitored using JNK- or p38-specific antibodies and a tubulin-specific antibody was used as the load control. HeLa cells were untreated (“Contr.”), treated with **PRT\_1** (+PRT), with a proteasome inhibitor (+MG132), or with both (PRT+MG132). **PRT\_1** and MG132 were used in 10  $\mu$ M concentration and treatment was for 24 hours. The plots below show the quantitative summary of normalized JNK1 level changes or the p38/tubulin WB signal ratio. JNK1 levels were normalized to the JNK1/tubulin WB signal ratio of the “Contr.”. Data show the mean value and error bars show SD based on three independent experiments (\*: p < 0.05; two-sided, unpaired t-test; n=3). Source data are provided as a source Date file.

**Supplementary Table 1. Values of  $k_{1-4}$ ,  $K_i$  [  $(k_2/k_1) / (1+ (k_3/k_4))$ ] and the energy contribution of reversible bond formation ( $\Delta\Delta G$ ) (see Fig. 3 and Supplementary Fig. 5).**

|                  | JNK-IN-8  | CA-IN-8    | 1aR-IN-8 | 1aS-IN-8 | 2-IN-8    | 3-IN-8    | 4-IN-8                                                                                                            |
|------------------|-----------|------------|----------|----------|-----------|-----------|-------------------------------------------------------------------------------------------------------------------|
| $k_1$            | 1.5E+6    | 1.1E+5     | 1.9E+5   | 2.9E+5   | 1.9E+5    | 1.3E+5    | 2.5E+5                                                                                                            |
| $k_2$            | 0.15360   | 0.09983    | 0.03172  | 0.05346  | 0.10230   | 0.04122   | 0.03529                                                                                                           |
| $k_3$            | 0.02952   | 0.01140    | 0.02617  | 0.02464  | 0.00615   | 0.03598   | 0.02385                                                                                                           |
| $k_4$            | -         | 0.00026    | 0.00034  | 0.00029  | 0.00111   | 0.00129   | 0.00028                                                                                                           |
| $K_i$            | -         | 20.6       | 2.1      | 2.1      | 81.0      | 10.7      | 1.6                                                                                                               |
| $\Delta\Delta G$ | -         | -2.25      | -2.57    | -2.64    | -1.11     | -1.99     | -2.64                                                                                                             |
|                  | 1a'R-IN-8 | 1a''R-IN-8 | 5S-IN-8  | 5R-IN-8  | 6S,S-IN-8 | 6R,R-IN-8 |                                                                                                                   |
| $k_1$            | 3.4E+5    | 3.9E+5     | 3.0E+5   | 3.11E+05 | 1.64E+5   | 3.76E+5   | $k_1$ ( $M^{-1} \cdot s^{-1}$ )<br>$k_2, k_3, k_4$ ( $s^{-1}$ )<br>$K_i$ (nM)<br>$\Delta\Delta G$<br>(kcal / mol) |
| $k_2$            | 0.05520   | 0.06206    | 0.10800  | 0.12720  | 0.03460   | 0.07970   |                                                                                                                   |
| $k_3$            | 0.60000   | 0.36693    | 0.05831  | 0.09699  | 0.01064   | 0.01045   |                                                                                                                   |
| $k_4$            | 0.02831   | 0.00508    | 0.00117  | 0.00420  | 0.00006   | 0.00016   |                                                                                                                   |
| $K_i$            | 7.4       | 2.2        | 7.1      | 17.0     | 1.1       | 3.1       |                                                                                                                   |
| $\Delta\Delta G$ | -1.83     | -2.54      | -2.33    | -1.88    | -3.10     | -2.50     |                                                                                                                   |

**Supplementary Table 2.** Results of the Wild Type Kinase Panel (Reaction Biology Corp, USA; 340 human kinases) with **1aR-IN-8** (BD837) used at 1  $\mu$ M concentration. (Values show the remaining kinase activity (%) compared to control, no inhibitor added; duplicate measurements; kinases for which inhibition was over 50 % are highlighted in orange.)

| #   | Kinase Name        | Kinase Family | BD837<br>1.00E-06 | BD837<br>1.00E-06 | Mean<br>1.00E-06 |
|-----|--------------------|---------------|-------------------|-------------------|------------------|
| 1   | ABL1               | TK            | 107               | 99                | 103              |
| 2   | ABL2               | TK            | 88                | 89                | 116              |
| 3   | ACK1               | TK            | 85                | 75                | 80               |
| 4   | ACVR1              | TKL           | 112               | 104               | 108              |
| 5   | ACVR2A             | TKL           | 111               | 112               | 111              |
| 6   | ACVR2B             | TKL           | 96                | 98                | 97               |
| 7   | ACVR3              | TKL           | 92                | 73                | 123              |
| 8   | ACVRL1             | TKL           | 87                | 83                | 85               |
| 9   | AGC                | AGC           | 91                | 85                | 128              |
| 10  | AKT2               | AGC           | 85                | 82                | 84               |
| 11  | AKT3               | AGC           | 101               | 91                | 96               |
| 12  | ALK                | TK            | 90                | 92                | 128              |
| 13  | AMPKalpha1         | CAMK          | 94                | 131               | 113              |
| 14  | ARAF Y0YD          | TK            | 100               | 93                | 97               |
| 15  | ARK5               | CAMK          | 105               | 96                | 100              |
| 16  | ASK1               | STE           | 95                | 102               | 99               |
| 17  | AuroraA            | OTHER         | 80                | 82                | 133              |
| 18  | AuroraB            | OTHER         | 85                | 80                | 82               |
| 19  | AuroraC            | OTHER         | 80                | 87                | 138              |
| 20  | AXL                | TK            | 109               | 97                | 103              |
| 21  | BLK                | TK            | 98                | 91                | 136              |
| 22  | BMPT1A             | TKL           | 106               | 96                | 101              |
| 23  | BMPT1B             | TKL           | 94                | 92                | 93               |
| 24  | BRK                | TK            | 94                | 93                | 140              |
| 25  | BRAF               | TKL           | 87                | 78                | 83               |
| 26  | BRK                | TK            | 92                | 91                | 142              |
| 27  | BRSK1              | CAMK          | 120               | 117               | 118              |
| 28  | BRSK2              | CAMK          | 107               | 99                | 103              |
| 29  | BTIC               | TK            | 99                | 93                | 146              |
| 30  | BUB1B              | OTHER         | 91                | 80                | 86               |
| 31  | CAMK1D             | AGC           | 94                | 93                | 147              |
| 32  | CAMK2A             | CAMK          | 100               | 105               | 102              |
| 33  | CAMK2B             | CAMK          | 107               | 95                | 104              |
| 34  | CAMK2D             | CAMK          | 97                | 90                | 93               |
| 35  | CAMK2G             | CAMK          | 117               | 104               | 110              |
| 36  | CAMK4              | AGC           | 93                | 84                | 152              |
| 37  | CAMK3              | OTHER         | 102               | 104               | 103              |
| 38  | CAMK5              | OTHER         | 97                | 82                | 147              |
| 39  | CD242BPB           | AGC           | 110               | 89                | 99               |
| 40  | CD42BMB            | AGC           | 98                | 93                | 96               |
| 41  | CDK2               | OTHER         | 86                | 87                | 127              |
| 42  | CDK1/CycA2         | CMGC          | 105               | 94                | 99               |
| 43  | CDK1/CycB1         | CMGC          | 102               | 89                | 158              |
| 44  | CDK1/CycE1         | CMGC          | 94                | 82                | 88               |
| 45  | CDK1/CycQ          | CMGC          | 88                | 88                | 160              |
| 46  | CDK11B-57-79S/CycK | CMGC          | 81                | 84                | 83               |
| 47  | CDK12/CycK         | CMGC          | 103               | 97                | 100              |
| 48  | CDK13/CycC         | CMGC          | 103               | 96                | 104              |
| 49  | CDK13/CycY         | CMGC          | 90                | 96                | 93               |
| 50  | CDK17/p38CK        | CMGC          | 91                | 84                | 167              |
| 51  | CDK18/CycY         | CMGC          | 104               | 101               | 103              |
| 52  | CDK19/CycC         | CMGC          | 62                | 61                | 62               |
| 53  | CDK20/CycD         | CMGC          | 93                | 85                | 168              |
| 54  | CDK20/CycD1        | CMGC          | 96                | 85                | 90               |
| 55  | CDK20/CycE1        | CMGC          | 90                | 90                | 90               |
| 56  | CDK20/CycH         | CMGC          | 96                | 91                | 94               |
| 57  | CDK20/CycT1        | CMGC          | 103               | 92                | 98               |
| 58  | CDK3/CycC          | CAMK          | 98                | 95                | 96               |
| 59  | CDK3/CycE1         | CMGC          | 106               | 91                | 96               |
| 60  | CDK4/CycD1         | CMGC          | 104               | 101               | 102              |
| 61  | CDK4/CycE2         | CMGC          | 86                | 87                | 88               |
| 62  | CDK4/CycE2         | CMGC          | 92                | 87                | 90               |
| 63  | CDK5/p38NCK        | CMGC          | 104               | 91                | 98               |
| 64  | CDK5/p38NCK        | CMGC          | 98                | 94                | 95               |
| 65  | CDK6/CycD          | CMGC          | 95                | 89                | 181              |
| 66  | CDK6/CycE2         | CMGC          | 108               | 100               | 104              |
| 67  | CDK6/CycC          | CMGC          | 97                | 95                | 94               |
| 68  | CDK7/CycH/MAT1     | CMGC          | 97                | 93                | 95               |
| 69  | CDK8/CycC          | CMGC          | 58                | 54                | 56               |
| 70  | CDK9/CycC          | CMGC          | 85                | 90                | 88               |
| 71  | CDK9/CycT1         | CMGC          | 88                | 83                | 85               |
| 72  | CHK1               | GAMK          | 93                | 87                | 90               |
| 73  | CHK2               | GAMK          | 89                | 90                | 89               |
| 74  | CK1alpha1          | CK1           | 91                | 95                | 93               |
| 75  | CK1delta           | CK1           | 82                | 79                | 81               |
| 76  | CK1epsilon         | CK1           | 113               | 105               | 109              |
| 77  | CK1gamma1          | CK1           | 87                | 95                | 95               |
| 78  | CK1gamma2          | CK1           | 87                | 72                | 80               |
| 79  | CK1gamma3          | CK1           | 86                | 88                | 92               |
| 80  | CK2alpha1          | OTHER         | 97                | 92                | 95               |
| 81  | CK2alpha2          | OTHER         | 103               | 95                | 99               |
| 82  | CLK1               | CMGC          | 82                | 80                | 81               |
| 83  | CLK2               | CMGC          | 124               | 109               | 117              |
| 84  | CLK3               | CMGC          | 102               | 97                | 91               |
| 85  | CLK4               | CMGC          | 96                | 85                | 91               |
| 86  | COT                | STE           | 91                | 88                | 90               |
| 87  | CSF1R              | TK            | 94                | 84                | 89               |
| 88  | CSK                | TK            | 96                | 87                | 91               |
| 89  | DAPK1              | CAMK          | 113               | 105               | 109              |
| 90  | DAPK2              | CAMK          | 90                | 93                | 96               |
| 91  | DAPK3              | CAMK          | 110               | 96                | 103              |
| 92  | DCAMK1.2           | CAMK          | 102               | 89                | 95               |
| 93  | DDK2               | TK            | 105               | 104               | 104              |
| 94  | DMPK               | AGC           | 97                | 95                | 96               |
| 95  | DNAPK              | ATYPICAL      | 105               | 96                | 101              |
| 96  | DYRK1A             | CMGC          | 80                | 91                | 90               |
| 97  | DYRK1B             | CMGC          | 91                | 87                | 89               |
| 98  | DYRK2              | CMGC          | 95                | 87                | 91               |
| 99  | DYRK3              | CMGC          | 95                | 90                | 93               |
| 100 | DYRK4              | CMGC          | 104               | 90                | 97               |
| 101 | E2F2               | ATYPICAL      | 88                | 85                | 86               |
| 102 | E2F3               | TK            | 109               | 88                | 89               |
| 103 | E1F3AK2            | OTHER         | 76                | 64                | 70               |
| 104 | E1F3AK3            | OTHER         | 94                | 91                | 93               |
| 105 | EPA1               | TK            | 90                | 84                | 87               |
| 106 | EPA2               | TK            | 101               | 86                | 94               |
| 107 | EPA3               | TK            | 78                | 74                | 76               |
| 108 | EPA4               | TK            | 92                | 73                | 83               |
| 109 | EPA5               | TK            | 138               | 110               | 114              |
| 110 | EPA6               | TK            | 94                | 87                | 91               |
| 111 | EPA7               | TK            | 95                | 81                | 88               |
| 112 | EPA8               | TK            | 82                | 81                | 81               |
| 113 | EPHB1              | TK            | 111               | 91                | 101              |
| 114 |                    |               |                   |                   |                  |
| 115 | EPHB3              | TK            | 98                | 98                | 98               |
| 116 | ERBB1              | TK            | 91                | 75                | 83               |
| 117 | ERBB2              | TK            | 83                | 80                | 87               |
| 118 | ERBB4              | TK            | 100               | 89                | 95               |
| 119 | ERK1               | CMGC          | 96                | 88                | 92               |
| 120 | ERK2               | CMGC          | 98                | 86                | 92               |
| 121 | ERK3               | CMGC          | 82                | 93                | 87               |
| 122 | ERK7               | CMGC          | 114               | 104               | 109              |
| 123 | FAK                | AGC           | 69                | 62                | 69               |
| 124 | FER                | TK            | 78                | 70                | 74               |
| 125 | FGFR               | TK            | 78                | 76                | 76               |
| 126 | FGFR1              | TK            | 85                | 81                | 83               |
| 127 | FGFR2              | TK            | 78                | 70                | 74               |
| 128 | FGFR3              | TK            | 101               | 104               | 104              |
| 129 | FGFR4              | TK            | 102               | 86                | 94               |
| 130 | FGFR5              | TK            | 83                | 77                | 80               |
| 131 | FLT3               | TK            | 92                | 79                | 86               |
| 132 | FRK                | TK            | 101               | 94                | 88               |
| 133 | FYN                | TK            | 102               | 89                | 89               |
| 134 | GRR2               | AGC           | 102               | 95                | 99               |
| 135 | GRR3               | AGC           | 116               | 102               | 109              |
| 136 | GRR4               | AGC           | 104               | 93                | 98               |
| 137 | GRR5               | AGC           | 103               | 87                | 85               |
| 138 | GRR6               | AGC           | 112               | 107               | 109              |
| 139 | GRR7               | AGC           | 102               | 95                | 99               |
| 140 | GSG2               | OTHER         | 89                | 80                | 84               |
| 141 | GSK3alpha          | CMGC          | 96                | 104               | 100              |
| 142 | GSK3beta           | CMGC          | 103               | 89                | 96               |
| 143 | HCK                | TK            | 101               | 93                | 97               |
| 144 | HIPK1              | CMGC          | 103               | 99                | 101              |
| 145 | HIPK2              | CMGC          | 93                | 89                | 93               |
| 146 | HIPK3              | CMGC          | 97                | 86                | 92               |
| 147 | HMPK4              | CMGC          | 95                | 94                | 95               |
| 148 | HRI                | OTHER         | 97                | 98                | 98               |
| 149 | ICGF1R             | TK            | 103               | 87                | 95               |
| 150 | IKKalpha           | OTHER         | 86                | 87                | 86               |
| 151 | IKKbeta            | OTHER         | 86                | 87                | 86               |
| 152 | IKKepsilon         | OTHER         | 90                | 88                | 88               |
| 153 | INSR               | TK            | 102               | 101               | 101              |
| 154 | INSR               | TK            | 90                | 89                | 89               |
| 155 | IRAK1              | TKL           | 86                | 84                | 85               |
| 156 | IRAK4              | TKL           | 104               | 103               | 103              |
| 157 | ITK                | TKL           | 97                | 100               | 97               |
| 158 | JAK1               | TK            | 91                | 93                | 92               |
| 159 | JAK2               | TK            | 92                | 96                | 94               |
| 160 | JAK3               | TK            | 99                | 93                | 96               |
| 161 | JNK1               | CMGC          | 2                 | 2                 | 2                |
| 162 | JNK2               | CMGC          | 1                 | 7                 | 7                |
| 163 | JNK3               | CMGC          | 1                 | 7                 | 7                |
| 164 | KIT                | TK            | 91                | 86                | 89               |
| 165 | LCK                | TK            | 102               | 104               | 103              |
| 166 | LIMK1              | TKL           | 45                | 43                | 44               |
| 167 | LIMK2              | TKL           | 93                | 77                | 85               |
| 168 | LRRK2              | CAMK          | 103               | 101               | 102              |
| 169 | LTK                | TK            | 86                | 85                | 85               |
| 170 | LTK                | TK            | 86                | 85                | 85               |
| 171 | LYN                | TK            | 110               | 88                | 84               |
| 172 | MAP3K1             | STE           | 81                | 85                | 83               |
| 173 | MAP3K10            | STE           | 74                | 70                | 72               |
| 174 | MAP3K11            | STE           | 96                | 88                | 98               |
| 175 | MAP3K7/JMAP3K7IP1  | STE           | 93                | 93                | 93               |
| 176 | MAP3K9             | STE           | 103               | 99                | 99               |
| 177 | MAP4K2             | STE           | 88                | 85                | 87               |
| 178 | MAP4K4             | STE           | 90                | 90                | 93               |
| 179 | MAP4K5             | STE           | 110               | 92                | 101              |
| 180 | MAP4K6             | STE           | 96                | 78                | 87               |
| 181 | MAPKAPK3           | CAMK          | 97                | 82                | 89               |
| 182 | MAPKAPK2           | CAMK          | 95                | 88                | 92               |
| 183 | MARK1              | CAMK          | 92                | 90                | 91               |
| 184 | MARK2              | CAMK          | 92                | 84                | 88               |
| 185 | MARK3              | CAMK          | 99                | 93                | 96               |
| 186 | MARK4              | CAMK          | 94                | 87                | 91               |
| 187 | MASTL              | AGC           | 94                | 95                | 94               |
| 188 | MATK               | TK            | 110               | 85                | 87               |
| 189 | MEK1               | STE           | 102               | 99                | 101              |
| 190 | MEK2               | STE           | 94                | 90                | 92               |
| 191 | MEK3               | STE           | 98                | 83                | 91               |
| 192 | MEK4               | STE           | 98                | 91                | 94               |
| 193 | MEK5               | STE           | 93                | 85                | 94               |
| 194 | MELK               | CAMK          | 82                | 67                | 74               |
| 195 | MERTK              | TK            | 95                | 89                | 92               |
| 196 | MET                | TK            | 99                | 102               | 101              |
| 197 | MINK1              | STE           | 92                | 87                | 89               |
| 198 | MNK4               | STE           | 132               | 131               | 132              |
| 199 | MNK5 SDTD          | STE           | 87                | 94                | 90               |
| 200 | MNK7               | STE           | 110               | 114               | 112              |
| 201 | MKNK1              | CAMK          | 97                | 97                | 97               |
| 202 | MKNK2              | CAMK          | 108               | 104               | 106              |
| 203 | MKL4               | TKL           | 116               | 109               | 113              |
| 204 | MST1               | STE           | 95                | 91                | 93               |
| 205 | MST2               | STE           | 111               | 110               | 113              |
| 206 | MST3               | STE           | 104               | 101               | 103              |
| 207 | MST4               | STE           | 106               | 97                | 101              |
| 208 | MTOR               | ATYPICAL      | 111               | 111               | 113              |
| 209 | MUSK               | TK            | 91                | 97                | 94               |
| 210 | NVYK               | CAMK          | 73                | 88                | 80               |
| 211 | MYLK2              | CAMK          | 84                | 90                | 87               |
| 212 | MYLK3              | CAMK          | 83                | 75                | 79               |
| 213 | NDRI1              | AGC           | 95                | 88                | 91               |
| 214 | NDRI2              | AGC           | 111               | 89                | 100              |
| 215 | NEK1               | OTHER         | 92                | 92                | 92               |
| 216 | NEK11              | OTHER         | 98                | 101               | 99               |
| 217 | NEK2               | OTHER         | 103               | 98                | 100              |
| 218 | NEK3               | OTHER         | 103               | 89                | 96               |
| 219 | NEK4               | OTHER         | 96                | 100               | 98               |
| 220 | NEK6               | OTHER         | 103               | 95                | 99               |
| 221 | NEK7               | OTHER         | 116               | 113               | 115              |
| 222 | NEK9               | OTHER         | 85                | 83                | 84               |
| 223 | NIK                | STE           | 106               | 89                | 98               |
| 224 | NLK                | CMGC          | 94                | 91                | 93               |
| 225 | p38alpha           | CMGC          | 101               | 88                | 95               |
| 226 | p38beta            | CMGC          | 86                | 83                | 85               |
| 227 | p38delta           | CMGC          | 113               | 105               | 109              |
| 228 | p38gamma           | CMGC          | 101               | 83                | 92               |
| 229 | PAK1               | STE           | 89                | 85                | 87               |
| 230 |                    |               |                   |                   |                  |
| 231 | PAK3               | STE           | 92                | 96                | 99               |
| 232 | PAK4               | STE           | 93                | 97                | 100              |
| 233 | PAK6               | STE           | 93                | 80                | 87               |
| 234 | PAK7               | STE           | 89                | 85                | 87               |
| 235 | PASK               | CAMK          | 94                | 88                | 91               |
| 236 | PDK                | OTHER         | 133               | 83                | 108              |
| 237 | PDGFRalpha         | TK            | 102               | 92                | 97               |
| 238 | PDGFRbeta          | TK            | 91                | 84                | 88               |
| 239 | PKA                | AGC           | 94                | 90                | 92               |
| 240 | PHK1               | CAMK          | 96                | 93                | 94               |
| 241 | PHK2               | CAMK          | 96                | 88                | 89               |
| 242 | PKA                | CAMK          | 97                | 93                | 93               |
| 243 | PKM2               | CAMK          | 104               | 95                | 99               |
| 244 | PKM3               | CAMK          | 103               | 90                | 96               |
| 245 | PKA                | AGC           | 72                | 71                | 71               |
| 246 | PKCalpha           | AGC           | 116               | 89                | 98               |
| 247 | PKCbeta1           | AGC           |                   |                   |                  |

**Supplementary Table 3.** The table shows data on the effect of JNK-IN-8<sup>1</sup> and **1aR**-IN-8 used in 1  $\mu$ M concentration. The table lists only those kinases that had < 50% remaining “activity” in the presence of the inhibitor (meaning that they were bound well by JNK-IN-8; apart from TNK1 and LIMK1 which were inhibited more than 50 % in the in vitro substrate phosphorylation test used in the **1aR**-IN-8 experiment).

| Kinase        | % control JNK-IN-8 <sup>#</sup> | % activity <b>1aR</b> -IN-8 <sup>1</sup> | Kinase       | % control JNK-IN-8 <sup>#</sup> | % activity <b>1aR</b> -IN-8 <sup>1</sup> | Kinase         | % control JNK-IN-8 <sup>#</sup> | % activity <b>1aR</b> -IN-8 <sup>1</sup> |
|---------------|---------------------------------|------------------------------------------|--------------|---------------------------------|------------------------------------------|----------------|---------------------------------|------------------------------------------|
| JNK3          | 0                               | 1                                        | FAK          | 11                              | 65                                       | CK2 $\alpha$ 2 | 39                              | 99                                       |
| JNK1          | 0                               | 2                                        | IRAK1        | 13                              | 85                                       | TTK            | 46                              | 77                                       |
| JNK2          | 0                               | 7                                        | MYLK2        | 13                              | 87                                       | MST2           | 48                              | 90                                       |
| PRKX          | 0                               | 102                                      | INSR         | 14                              | 101                                      | SGK3           | 48                              | 106                                      |
| KIT           | 4                               | 69                                       | CK1 $\delta$ | 18                              | 81                                       | ROCK2          | 49                              | 92                                       |
| HIPK4         | 4                               | 94                                       | p38 $\beta$  | 20                              | 85                                       | ...            |                                 |                                          |
| PDGFR $\beta$ | 5                               | 88                                       | DYRK2        | 20                              | 91                                       | ...            |                                 |                                          |
| MKNK2         | 7                               | 106                                      | STK17A       | 24                              | 74                                       | TNK1           | 60                              | 38                                       |
| CS1FR         | 9                               | 89                                       | CDK7         | 39                              | 95                                       | LMK1           | 74                              | 44                                       |

(<sup>#</sup> Data from Zhang et al., 2012; off-target kinases with < 50% remaining “activity” (namely % of control signal compared to when no inhibitor was added) is colored in gray; <sup>1</sup> Data from this study; average of two experiments; N=2). Note that the values in the different columns cannot be directly compared but we used this comparison to choose a limited set of off-target kinases to be tested with the same assay; see text and Fig. 5b)

### Supplementary Table 4. Comparative pharmacokinetic analysis of the warhead designs

The metabolic stability of composite JNK inhibitors containing different warheads (WH) were analyzed using rat primary hepatocytes and blood plasma. The cyclic warheads had differently functionalized C4 (see black arrowhead shown at the structure of **2-IN-8**). The table below shows the results of hepatic in vivo clearance prediction calculated from the in vitro PK values ( $Cl_{int}$ ) measured in primary rat hepatocytes as well as the elimination half-life values ( $t_{1/2}$ ) of the intact compounds in rat blood plasma. The data show the mean with SD values determined from samples obtained from three different animals (n=3). ('-' not available, not measured; 'stable' indicates that there was no change detected in compound concentration after 120 minutes; \* indicates that  $t_{1/2}$  is only estimated because decrease of compound concentration after 120 minutes did not reach 50% of the initial concentration; \*\* indicates that no parent compound was detected at the first sampling time point (10-min);  $Cl_{int}$ ,  $Cl_H$ ,  $E_H$ , and F denote measured intrinsic clearance (ml/min/kg), predicted hepatic clearance, hepatic extraction ratio, and bioavailability, respectively; the cut-off value was 0.3 between the low (slow) and intermediate extraction compounds. Source data are provided as a Source Data file.

| WH                 |                        | JNK-IN-8      | <b>2-IN-8</b> | <b>1aR-IN-8</b>     | <b>6S,S-IN-8</b> | <b>1cR-IN-8</b> | <b>5S-IN-8</b> | PK_test             |
|--------------------|------------------------|---------------|---------------|---------------------|------------------|-----------------|----------------|---------------------|
| <b>liver (rat)</b> | in vitro PK            |               |               |                     |                  |                 |                |                     |
|                    | $Cl_{int}$ (ml/min/kg) | 15.1 ± 4.9    | -             | 294.2 ± 130.0       | -                | -               | -              | 501.0 ± 254.6       |
|                    | predicted in vivo PK   |               |               |                     |                  |                 |                |                     |
|                    | $Cl_H$ (ml/min/kg)     | 10.1 ± 2.3    | -             | 28.4 ± 1.8          | -                | -               | -              | 29.6 ± 1.6          |
|                    | $E_H$                  | 0.18 ± 0.04   | -             | 0.51 ± 0.03         | -                | -               | -              | 0.54 ± 0.03         |
| F (%)              | 81.6 ± 4.1             | -             | 48.5 ± 3.2    | -                   | -                | -               | 46.4 ± 2.9     |                     |
|                    |                        | <b>Slow</b>   | <b>-</b>      | <b>Intermediate</b> | <b>-</b>         | <b>-</b>        | <b>-</b>       | <b>Intermediate</b> |
| <b>blood (rat)</b> | stability in plasma    |               |               |                     |                  |                 |                |                     |
|                    | $t_{1/2}$ (min)        | 347.0 ± 40.0* | <b>Stable</b> | 17.9 ± 8.9          | 3.1 ± 1.1        | 44.7 ± 3.9      | 275.8 ± 20.9*  | <10**               |

## SUPPLEMENTARY NOTE 1 (on the topographic steric map calculations)

To gain insight into steric environment of the reactive centre, we performed DFT calculations with the *Gaussian 16* suite of programs (Revision A.03).<sup>2</sup> The original molecules were truncated by replacing the directing noncovalent moiety with a Me-group. The geometry optimizations were performed using dispersion-corrected, range-separated hybrid  $\omega$ B97X-D exchange-correlation functional with implicit SMD continuum solvation model (water;  $\epsilon = 78.3553$ ).<sup>3-5</sup> Several conformers were examined for each ligand, and we report only the most stable forms herein. The relative stabilities of the conformers were estimated based on the computed Gibbs free energy. The Gibbs free energies were obtained by combining  $\omega$ B97X-D/Def2TZVPP/SMD(H<sub>2</sub>O) electronic energies ( $E_0'$ ) with the thermal and entropic contributions computed at the  $\omega$ B97X-D/Def2SVP/SMD(H<sub>2</sub>O) level (T = 298.15 K).<sup>6</sup> The thermal and entropic contributions were estimated within the ideal gas–rigid rotor–harmonic oscillator (RRHO) approximation. The formula that was used to calculate the free energy is:  $G = E_0' + (G_0 - E_0) + \Delta G_{\text{conc}}$ , where  $E_0$  and  $G_0$  denote electronic and Gibbs free energies obtained with the Def2SVP basis set. The value of  $\Delta G_{\text{conc}}$  (0.0030119 Hartree at 298.15 K  $\approx$  1.89 kcal/mol) corresponds to concentration correction to the Gibbs free energy when shifting from ideal gas standard state ( $p = 1$  atm) to the standard concentration in solution phase ( $c = 1$  mol/dm<sup>3</sup>).

To quantify the steric encumbrance around the reactive carbon atom, we applied buried volume descriptor (%V<sub>Bur</sub>) using *SambVca 2.1* web application.<sup>7</sup> The buried volume measures the space occupied by the adjacent atoms in the sphere of the reactive center. The space taken by a given atom is calculated based on the Bondi radius of the atom. For calculation of the buried volume, the most important parameters from a practical standpoint are the following: (1) The atoms coordinated to the center of the sphere was the reactive carbon atom. (2) Applied sphere radius 3.5 Å (3) The atomic radii were scaled by 1.17 (4) The H atoms in the calculations were included in the calculations of the buried volume.

### Computed energy components of the reported structures

| Structure | $E_0'$ (H <sub>2</sub> O) | $G_0$ (H <sub>2</sub> O) | $E_0$ (H <sub>2</sub> O) | $G$ (H <sub>2</sub> O) |
|-----------|---------------------------|--------------------------|--------------------------|------------------------|
| <b>a1</b> | -286.6396                 | -286.2385                | -286.3159                | -286.5592              |
| <b>a2</b> | -459.9381                 | -459.2548                | -459.4267                | -459.7632              |
| <b>b1</b> | -378.8785                 | -378.3780                | -378.4512                | -378.8023              |
| <b>b2</b> | -536.1530                 | -535.3802                | -535.5597                | -535.9705              |
| <b>c1</b> | -516.7407                 | -516.0230                | -516.1702                | -516.5905              |
| <b>c2</b> | -595.3765                 | -594.5222                | -594.7225                | -595.1732              |
| <b>c3</b> | -783.9560                 | -782.8749                | -783.0855                | -783.7423              |
| <b>c4</b> | -862.5899                 | -861.3720                | -861.6367                | -862.3223              |
| <b>c5</b> | -860.1415                 | -858.9711                | -859.1932                | -859.9164              |

**Supplementary Table 5.** Summary of energy data (given in Hartree) computed for optimized structures at the  $\omega$ B97X-D/Def2SVP/SMD(H<sub>2</sub>O) level of theory. Note that G contains concentration correction. For the definition of various energy components, see Computational details section (vide supra).

*Cartesian coordinates of the reported structures*

Cartesian coordinates of the optimized geometries are given below in standard XYZ format (units are in Å). The first line is the molecule name (as defined above in **Supplementary Table 5.**), the second line indicates total number of atoms.

13

**a1**

|   |           |           |           |
|---|-----------|-----------|-----------|
| C | -4.267660 | 0.775928  | 0.625459  |
| O | -3.444446 | 0.218518  | -0.107075 |
| C | -5.739941 | 0.575290  | 0.485359  |
| H | -6.393974 | 1.114691  | 1.177515  |
| N | -3.895570 | 1.612020  | 1.610398  |
| H | -4.610601 | 2.038761  | 2.187787  |
| C | -2.506200 | 1.905253  | 1.876918  |
| H | -2.445844 | 2.614528  | 2.709936  |
| H | -1.949603 | 0.995309  | 2.149099  |
| H | -2.017181 | 2.352631  | 0.998236  |
| C | -6.243868 | -0.231866 | -0.448065 |
| H | -5.585761 | -0.769238 | -1.137348 |
| H | -7.321345 | -0.380039 | -0.551908 |

24

**a2**

|   |           |           |           |
|---|-----------|-----------|-----------|
| C | -4.328470 | 0.572255  | 0.776920  |
| O | -3.603217 | -0.423072 | 0.672429  |
| C | -5.749190 | 0.590062  | 0.334652  |
| H | -6.312477 | 1.520925  | 0.459927  |
| N | -3.877515 | 1.726812  | 1.300505  |
| H | -4.510121 | 2.515406  | 1.365774  |
| C | -2.520088 | 1.871497  | 1.772707  |
| H | -2.380816 | 2.891639  | 2.147624  |
| H | -2.301739 | 1.165026  | 2.588253  |
| H | -1.793948 | 1.692289  | 0.965057  |
| C | -6.326301 | -0.488751 | -0.201857 |
| H | -5.728901 | -1.400137 | -0.321715 |
| C | -7.757732 | -0.565520 | -0.628822 |
| H | -8.224932 | 0.441875  | -0.563405 |
| H | -8.288091 | -1.204586 | 0.098125  |
| N | -7.925472 | -1.155358 | -1.949534 |
| C | -7.336911 | -0.308788 | -2.972251 |
| H | -7.454970 | -0.773388 | -3.962003 |
| H | -7.804104 | 0.699465  | -3.012124 |
| H | -6.260571 | -0.171192 | -2.793006 |
| C | -9.333805 | -1.373008 | -2.223857 |
| H | -9.773158 | -2.042410 | -1.469645 |
| H | -9.921135 | -0.429242 | -2.222427 |
| H | -9.460530 | -1.843019 | -3.210095 |

14

**b1**

|   |           |           |           |
|---|-----------|-----------|-----------|
| C | -4.215164 | 1.055198  | 0.188714  |
| O | -3.636839 | -0.026995 | 0.133952  |
| C | -5.724644 | 1.116663  | 0.139668  |
| N | -3.569432 | 2.223864  | 0.294415  |
| H | -4.090302 | 3.093351  | 0.332196  |
| C | -2.124564 | 2.280227  | 0.349612  |
| H | -1.815618 | 3.327972  | 0.429423  |
| H | -1.739765 | 1.729901  | 1.220974  |
| H | -1.676388 | 1.846642  | -0.556710 |
| C | -6.442784 | -0.010007 | 0.045123  |
| H | -5.924843 | -0.970773 | 0.003326  |
| C | -6.384855 | 2.391200  | 0.197448  |
| N | -6.904801 | 3.426793  | 0.244513  |
| H | -7.533430 | 0.005316  | 0.009061  |

26

**b2**

|   |           |           |           |
|---|-----------|-----------|-----------|
| C | -4.232085 | 1.053584  | 0.193036  |
| O | -3.644253 | -0.025576 | 0.145247  |
| C | -5.740745 | 1.114583  | 0.142554  |
| N | -3.585083 | 2.223380  | 0.291756  |
| H | -4.106191 | 3.092661  | 0.323040  |
| C | -2.140608 | 2.280375  | 0.347766  |
| H | -1.832165 | 3.328729  | 0.422674  |
| H | -1.755265 | 1.735066  | 1.222136  |
| H | -1.690326 | 1.842901  | -0.555732 |
| C | -6.434589 | -0.036164 | 0.039743  |
| H | -5.801557 | -0.929648 | 0.001558  |
| C | -6.368875 | 2.401679  | 0.205056  |
| N | -6.833179 | 3.464115  | 0.256581  |
| C | -7.930516 | -0.250782 | -0.034224 |
| C | -8.493685 | 0.432739  | -1.293592 |
| H | -9.572292 | 0.226345  | -1.369883 |
| H | -8.360979 | 1.524087  | -1.265679 |
| H | -8.006621 | 0.048097  | -2.202524 |
| C | -8.194798 | -1.759944 | -0.118532 |
| H | -7.800685 | -2.279840 | 0.768399  |
| H | -9.275805 | -1.956432 | -0.177696 |
| H | -7.718298 | -2.195361 | -1.010486 |
| C | -8.612946 | 0.311441  | 1.225621  |
| H | -8.205168 | -0.153708 | 2.135961  |
| H | -8.494046 | 1.401087  | 1.310938  |
| H | -9.691252 | 0.094104  | 1.184056  |

22

**c1**

|   |           |           |          |
|---|-----------|-----------|----------|
| C | -1.800983 | -1.434201 | 0.253909 |
| C | -0.320515 | -1.321475 | 0.341384 |
| C | 0.354739  | -0.225238 | 0.753395 |
| C | -0.398783 | 1.007468  | 1.106263 |



|   |           |           |           |
|---|-----------|-----------|-----------|
| C | -1.884807 | 0.993105  | 0.845214  |
| C | -2.514505 | -0.373434 | 1.080912  |
| H | 0.274642  | -2.189562 | 0.041965  |
| H | -2.068684 | -1.342552 | -0.816163 |
| H | -2.103661 | -2.451447 | 0.544808  |
| H | -2.343796 | 1.781268  | 1.457142  |
| H | -2.009296 | 1.287125  | -0.213505 |
| H | -2.434360 | -0.631743 | 2.149599  |
| H | -3.584878 | -0.346049 | 0.834581  |
| O | 0.141951  | 2.017156  | 1.543357  |
| C | 1.859658  | -0.317888 | 0.795188  |
| O | 2.444211  | -1.337499 | 0.412995  |
| N | 2.520222  | 0.745921  | 1.268333  |
| H | 1.960821  | 1.549477  | 1.549648  |
| C | 3.961101  | 0.766358  | 1.353036  |
| H | 4.277996  | 1.729100  | 1.769903  |
| H | 4.336594  | -0.038202 | 2.003844  |
| H | 4.425161  | 0.643381  | 0.362209  |

28

**c2**

|   |           |           |           |
|---|-----------|-----------|-----------|
| C | -1.896443 | -1.195577 | -0.035993 |
| C | -0.404318 | -1.164440 | 0.122406  |
| C | 0.320575  | -0.216404 | 0.754287  |
| C | -0.366922 | 0.961984  | 1.344962  |
| C | -1.845164 | 1.086509  | 1.081375  |
| C | -2.551002 | -0.258522 | 0.989274  |
| H | 0.150472  | -1.989166 | -0.338171 |
| H | -2.274698 | 1.726497  | 1.864010  |
| H | -1.936437 | 1.642411  | 0.131200  |
| H | -2.520004 | -0.744664 | 1.978449  |
| H | -3.612103 | -0.114090 | 0.736457  |
| O | 0.223072  | 1.829590  | 1.979183  |
| C | 1.817662  | -0.406797 | 0.791504  |
| O | 2.350989  | -1.365902 | 0.222959  |
| N | 2.527081  | 0.503587  | 1.469261  |
| H | 2.006983  | 1.267368  | 1.898589  |
| C | 3.965084  | 0.423997  | 1.569647  |
| H | 4.325567  | 1.268562  | 2.167802  |
| H | 4.282776  | -0.511076 | 2.056001  |
| H | 4.441260  | 0.467761  | 0.577954  |
| C | -2.389207 | -2.632335 | 0.179383  |
| H | -3.485852 | -2.669248 | 0.089687  |
| H | -1.960081 | -3.315031 | -0.569988 |
| H | -2.115268 | -3.001487 | 1.179670  |
| C | -2.214225 | -0.763437 | -1.481336 |
| H | -1.700469 | -1.412762 | -2.206378 |
| H | -3.297784 | -0.841876 | -1.659470 |
| H | -1.904143 | 0.273688  | -1.677028 |

31

**c3**

|   |           |           |           |
|---|-----------|-----------|-----------|
| C | -1.945765 | -1.157473 | 0.086630  |
| C | -0.441987 | -1.131223 | 0.142864  |
| C | 0.312170  | -0.212001 | 0.775308  |
| C | -0.338594 | 0.963148  | 1.419763  |
| C | -1.827216 | 1.098112  | 1.231588  |
| C | -2.538325 | -0.245055 | 1.175551  |
| H | 0.080701  | -1.947194 | -0.365634 |
| H | -2.214931 | 1.734247  | 2.038224  |
| H | -1.969382 | 1.654935  | 0.287359  |
| H | -2.426069 | -0.762355 | 2.141438  |
| H | -3.614493 | -0.106749 | 1.004675  |
| O | 0.288458  | 1.813483  | 2.037358  |
| C | 1.808878  | -0.423023 | 0.749615  |
| O | 2.301653  | -1.379135 | 0.143000  |
| N | 2.556374  | 0.464524  | 1.414747  |
| H | 2.067223  | 1.230057  | 1.875554  |
| C | 3.996106  | 0.363003  | 1.455564  |
| H | 4.391964  | 1.186590  | 2.060371  |
| H | 4.317914  | -0.588995 | 1.904581  |
| H | 4.432617  | 0.426263  | 0.446888  |
| C | -2.434084 | -2.603238 | 0.266826  |
| H | -3.531339 | -2.635410 | 0.301035  |
| H | -2.086442 | -3.245122 | -0.555927 |
| H | -2.045445 | -3.008521 | 1.212339  |
| C | -2.359532 | -0.643453 | -1.294159 |
| O | -1.601788 | -0.140805 | -2.094746 |
| O | -3.655650 | -0.796422 | -1.516786 |
| C | -4.162097 | -0.330040 | -2.767095 |
| H | -5.235778 | -0.543916 | -2.757269 |
| H | -3.992803 | 0.750536  | -2.870561 |
| H | -3.678637 | -0.860473 | -3.598775 |

37

**c4**

|   |           |           |           |
|---|-----------|-----------|-----------|
| C | -1.905402 | -1.184990 | 0.119339  |
| C | -0.402802 | -1.133127 | 0.186361  |
| C | 0.330047  | -0.177188 | 0.789081  |
| C | -0.345062 | 1.010323  | 1.381677  |
| C | -1.835528 | 1.105682  | 1.185426  |
| C | -2.517788 | -0.253931 | 1.179374  |
| H | 0.147967  | -1.951229 | -0.286344 |
| H | -2.238825 | 1.763784  | 1.966380  |
| H | -1.987323 | 1.624034  | 0.220507  |
| H | -2.398880 | -0.720808 | 2.167643  |
| H | -3.595057 | -0.143518 | 1.000758  |
| O | 0.262745  | 1.898913  | 1.964100  |
| C | 1.829642  | -0.365728 | 0.785795  |
| O | 2.342188  | -1.346469 | 0.236936  |

|   |           |           |           |
|---|-----------|-----------|-----------|
| N | 2.558201  | 0.568828  | 1.405937  |
| H | 2.052543  | 1.347193  | 1.825911  |
| C | 3.998545  | 0.488827  | 1.469522  |
| H | 4.376481  | 1.351132  | 2.030226  |
| H | 4.326643  | -0.431436 | 1.976531  |
| H | 4.446599  | 0.499555  | 0.464042  |
| C | -2.408082 | -2.658179 | 0.299549  |
| H | -3.498330 | -2.577801 | 0.438895  |
| C | -2.310816 | -0.705623 | -1.275616 |
| O | -1.531403 | -0.408382 | -2.153951 |
| O | -3.626105 | -0.663243 | -1.426284 |
| C | -4.121918 | -0.277246 | -2.707204 |
| H | -5.213574 | -0.315419 | -2.633327 |
| H | -3.795402 | 0.742081  | -2.954645 |
| H | -3.770389 | -0.975279 | -3.479525 |
| C | -1.812524 | -3.316100 | 1.544558  |
| H | -2.281490 | -4.298353 | 1.704273  |
| H | -0.729250 | -3.482817 | 1.432054  |
| H | -1.972327 | -2.721844 | 2.455400  |
| C | -2.152307 | -3.526869 | -0.933031 |
| H | -2.504507 | -4.551899 | -0.745469 |
| H | -2.684014 | -3.158412 | -1.823438 |
| H | -1.079260 | -3.586313 | -1.174688 |

33

**c5**

|   |           |           |           |
|---|-----------|-----------|-----------|
| C | -1.925685 | -0.672865 | -0.026240 |
| C | -0.460348 | -0.417562 | -0.215418 |
| C | 0.303174  | 0.213917  | 0.699827  |
| C | -0.337409 | 0.678322  | 1.962473  |
| C | -1.800722 | 0.302006  | 2.113615  |
| C | -2.529540 | 0.492282  | 0.781766  |
| H | -2.218342 | 0.864934  | 2.956228  |
| H | -3.611102 | 0.354828  | 0.911928  |
| H | -2.344799 | 1.469077  | 0.313458  |
| O | 0.256171  | 1.276731  | 2.847046  |
| C | 1.766508  | 0.394079  | 0.387957  |
| O | 2.248403  | -0.040840 | -0.662307 |
| C | 3.911289  | 1.276183  | 1.114260  |
| C | -2.092765 | -1.859626 | 0.973113  |
| H | -3.127257 | -2.230810 | 0.913910  |
| H | -1.414961 | -2.696574 | 0.756275  |
| C | -2.611468 | -0.935759 | -1.354646 |
| O | -2.042709 | -1.060243 | -2.415892 |
| O | -3.926033 | -1.023404 | -1.218003 |
| C | -4.689886 | -1.288295 | -2.394023 |
| H | -5.735706 | -1.327774 | -2.072825 |
| H | -4.551034 | -0.485218 | -3.130658 |
| H | -4.393442 | -2.249539 | -2.835657 |
| C | -1.838681 | -1.211732 | 2.317077  |

|   |           |           |           |
|---|-----------|-----------|-----------|
| C | -1.644021 | -1.832180 | 3.479606  |
| H | -1.468892 | -1.266752 | 4.399100  |
| H | -1.661108 | -2.923498 | 3.549112  |
| H | 0.012991  | -0.784538 | -1.129155 |
| N | 2.498175  | 1.044087  | 1.300373  |
| H | 2.019073  | 1.363208  | 2.140653  |
| H | 4.104116  | 1.866547  | 0.205517  |
| H | 4.296120  | 1.828679  | 1.978761  |
| H | 4.465822  | 0.329247  | 1.026964  |

**SUPPLEMENTARY NOTE 2 (on the NMR experiment of the BME–1aR-IN-8 adduct formation)**

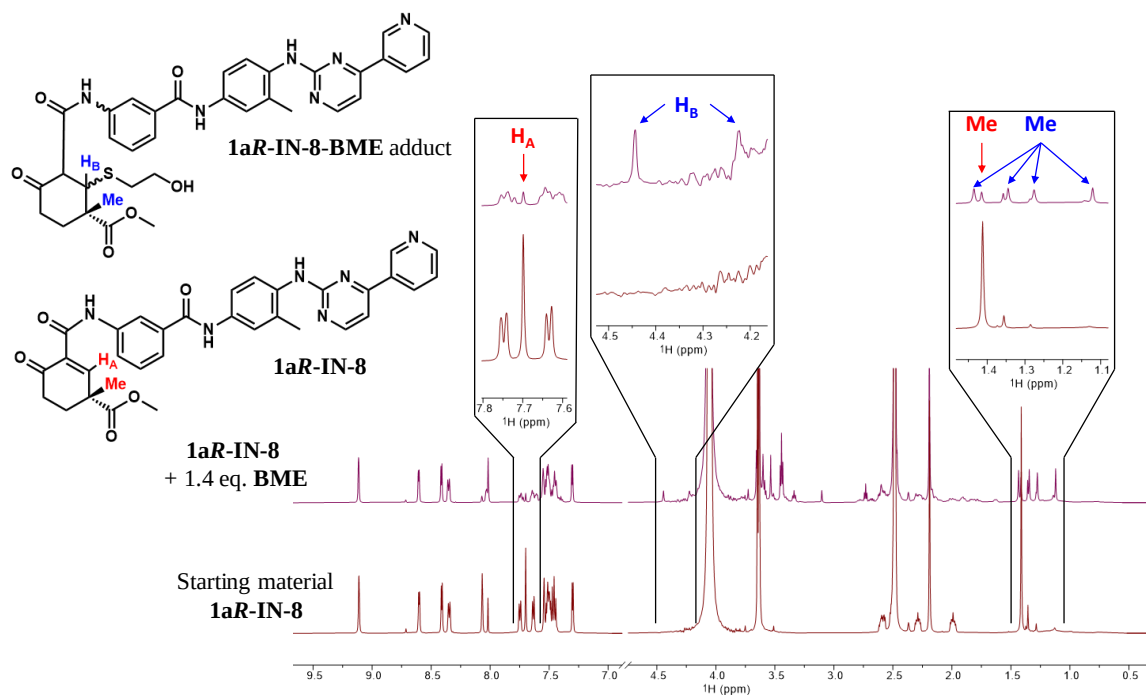

**Supplementary Fig. 16.** The <sup>1</sup>H NMR spectra of **1aR-IN-8** before (lower spectrum) and after (upper spectrum) the addition of 1.4 eq. **BME** in DMSO-d<sub>6</sub> –PBS (D<sub>2</sub>O) buffer. The disappearance of the H<sub>A</sub> alkene hydrogen and the emergence of H<sub>B</sub> signals indicating the Michael adduct formation. The presence of four newly appeared methyl groups (instead of the anticipated two signals due to diastereomer formation) can be explained by the hindered rotation of the amide group.

### **SUPPLEMENTARY NOTE 3 (on the LC-MS analysis for the PK measurements)**

#### *Mass spectrometric analysis*

The quantitation of the parent compounds in primary hepatocytes were identified using a Triple TOF 5600+ hybrid Quadrupole-TOF LC/MS/MS system (Sciex, Framingham, MA, USA) equipped with a DuoSpray Ion source coupled with a Shimadzu Prominence LC20 UFLC (Shimadzu, Japan) system consisting of quaternary pump, an autosampler and a thermostated column compartment, a UV-VIS detector and a communication module. Data acquisition was performed using Analyst TF software version 1.7.1 (Sciex, Framingham, MA, USA).

Chromatographic separation was performed on a XSelect CSH C18 (150 x 4.6 mm, 3.5 $\mu$ ) HPLC column (Waters, MA, USA). Gradient elution was applied by using water containing 0.1% formic acid (eluent A) and acetonitrile containing 0.1% formic acid (eluent B). The initial composition of solvents was 5% of eluent B and this was kept for 0.5 min. A linear gradient was applied by 5 min to reach 95% of eluent B. This was held for 1 min and the initial solvent composition was set back by 0.5 min followed by a 3 min equilibration part. The flow rate was 1 mL/min. 5  $\mu$ L of samples were injected. The column temperature was set to 40°C.

Data were acquired in positive electrospray mode. The mass range was set to m/z 150-1000 with an accumulation time of 0.25 s. Source conditions were: spray voltage: 5000V, nebulizer gas (GS1), drying gas (GS2) and curtain gas (CUR) values were set to 40, 45 and 45 arbitrary unit, respectively. The declustering potential (DP) was set to 80V and source temperature was set to 450°C. The resolution of the instrument was above 25000 over the entire mass range.

Peak View Software<sup>TM</sup> V.2.2 (version 2.2, Sciex, Framingham, MA, USA) was used for the data processing.

#### *Quantitation of parent compounds in serum samples*

The quantitation of the parent compounds was performed in two separate batches on two different MS system. The reason of this change in mass spectrometer was the failure of the high voltage power supply the repair of which required longer time.

The first batch was run on the Triple TOF 5600+ hybrid Quadrupole-TOF LC/MS/MS system (Sciex, Framingham, MA, USA) equipped with a DuoSpray Ion source coupled with a Shimadzu Prominence LC20 UFLC (Shimadzu, Japan) system consisting of quaternary pump,

an autosampler and a thermostated column compartment, a UV-VIS detector and a communication module. Data acquisition was performed using Analyst TF software version 1.7.1 (Sciex, Framingham, MA, USA).

The same MS conditions were used as described above in case of primary hepatocyte experiments.

The second batch was, however, measured on a Sciex 6500QTrap (Sciex, Framingham, MA, USA) hybrid quadrupole-ion trap mass spectrometer equipped with Turbo-V ion source. HPLC separations were carried out on an Agilent 1100 system consisting of a binary pump, an autosampler and a column compartment. Analyst 1.6.3. (Sciex, Framingham, MA, USA) software was used for controlling the instrument and for data processing. Quantitation was performed by using the Sciex Multiquant software.

In case of triple quadrupole mass spectrometer, a sensitive MRM experiment was used with two optimized MRM transitions for each parent molecule.

The same chromatographic method was used for both batches by using Kinetex EVO C18 (50 x 2.1 mm, 5 $\mu$ m) HPLC column (Phenomenex, Torrance, CA, USA). Gradient elution was applied by using water containing 0.1% formic acid (eluent A) and acetonitrile containing 0.1% formic acid (eluent B). The initial composition of solvents was 5% of eluent B and kept for 0.5 min. A linear gradient was applied by 4 min to reach 95% of eluent B. This was held for 0.5 min and the initial solvent composition was set back by 0.2 min followed by a 2.8 min equilibration part. The flow rate was 0.6 mL/min. 2  $\mu$ L of samples were injected. The column temperature was ambient.

## SUPPLEMENTARY NOTE 4 (on the synthesis of the compounds)

### General procedure of synthesizing cyclohexenone warhead compounds:

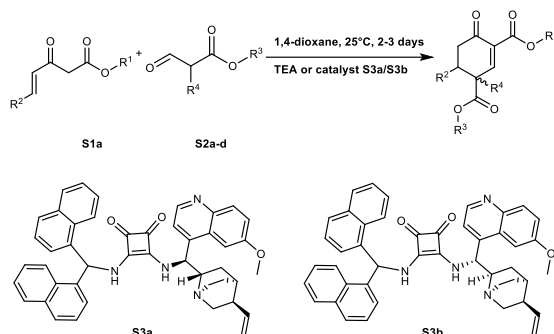

Compound **S1a** (1.0 eq.), compound **S2a-d** (1.1 eq.) and the catalyst (triethylamine (0.10 eq.) for racemic mixtures or catalyst **S3a** or **S3b** (0.02 eq.) for the enantiomerically enriched compounds respectively) was dissolved in 1,4-dioxane (1.0 M) and the reaction mixture was stirred at 25°C for 2-3 days. When the reaction was completed removal of the volatile compounds under reduced pressure was followed by purification by flash chromatography on silica gel (hexanes 0-25% ethyl acetate) giving the products as a yellow oil.

Compounds **S1a**, **S2a-c**, **S3a**, **S3b** were synthesized according to literature procedures.<sup>8-10</sup>

### Preparation of 1-(*tert*-butyl) 3-methyl 3-methyl-6-oxocyclohex-1-ene-1,3-dicarboxylate (**S4**, **S4R/S4S**):

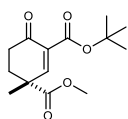

Following the **General Procedure A** using: **S1a** (2.50 g, 14.7 mmol), **S2a** (1.88 g, 16.2 mmol) and **S3a/S3b** (201.0 mg, 0.29 mmol) in 1,4-dioxane (15 mL, 1.0 M) at 25°C for 2 days. After removal of the volatile compounds under reduced pressure, purification by flash chromatography on silica gel (hexanes 0-25% ethyl acetate) gave the product as a yellow oil (2.25 g, 57% for **S4**, 2.81 g, 71% for **S4R**, 2.78 g, 71% for **S4S**).

**ee**: 99% with catalyst **S3a**

**ee**: -89% with catalyst **S3b**

**HRMS** (ESI-TTOF)  $m/z$   $[M+H]^+$  calculated for C<sub>14</sub>H<sub>21</sub>O<sub>5</sub> 269.1379 found 269.1383

**<sup>1</sup>H NMR** (500 MHz, CDCl<sub>3</sub>):  $\delta$  7.31 (s, 1H); 3.73 (s, 3H); 2.53 – 2.45 (m, 2H); 2.44 – 2.37 (m, 1H); 2.00 – 1.90 (m, 1H); 1.48 (s, 9H); 1.45 (s, 3H).

**<sup>13</sup>C NMR** (125 MHz, CDCl<sub>3</sub>):  $\delta$  193.6; 173.9; 163.7; 153.9; 133.3; 82.2; 52.9; 44.2; 35.4; 32.1; 28.1; 24.7;



**Preparation of 3-(methoxycarbonyl)-3-methyl-6-oxocyclohex-1-ene-1-carboxylic acid (S5, S5R/S5S):**

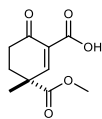

Trifluoroacetic acid (811  $\mu$ L, 10.53 mmol, 3 eq.) was added to a solution of compound **S4/S4R/S4S** (942 mg, 3.51 mmol, 1 eq.) in methylene chloride (20 mL) and then the mixture was stirred at 25°C for 3 hours. The reaction was monitored by TLC and when it was completed the reaction mixture was evaporated. The remaining trifluoroacetic acid was removed by redissolving the mixture in toluene and evaporating to dryness at 50°C for three times. Compound **S5/S5R/S5S** was obtained as a yellow oil in quantitative yield (745 mg) and was used in the next step without further purification.

**HRMS** (ESI-TTOF)  $m/z$   $[M+H]^+$  calculated for  $C_{10}H_{13}O_5$  213.0757 found 213.0759

**$^1H$  NMR** (500 MHz,  $CDCl_3$ ):  $\delta$  8.30 (s, 1H), 3.79 (s, 3H), 2.78–2.65 (m, 2H), 2.58–2.53 (m, 1H), 2.08–2.02 (m, 1H), 1.56 (s, 1H).

**$^{13}C$  NMR** (125 MHz,  $CDCl_3$ ):  $\delta$  200.1, 172.6, 165.2, 163.4, 126.0, 53.2, 45.4, 34.6, 31.8, 24.5;

**Preparation of 3,3-dimethyl-6-oxocyclohex-1-ene-1-carboxylic acid (S6):**

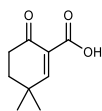

Compound **S6** was prepared according to the literature procedures.<sup>11,12</sup>

**Preparation of 3,3-dimethyl-5-oxocyclopent-1-ene-1-carboxylic acid (S7):**

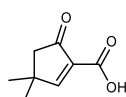

Compound **S7** was prepared according to the literature procedures.<sup>13–15</sup>

**Preparation of methyl 1-methyl-4-oxocyclohex-2-enecarboxylate (S8):**

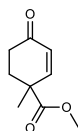

To methyl vinyl ketone (500  $\mu$ L, 6.00 mmol, 1 eq.), dissolved in 6 mL of 1,4-dioxane, was added **S2a** (770.0 mg, 6.60 mmol, 1.1 eq.) and triethylamine (170  $\mu$ L, 1.5 mmol, 0.25 eq.). The reaction mixture was stirred at 25°C and monitored by TLC. Upon completion, *p*-toluenesulfonic acid (630 mg, 3.3 mmol, 0.55 eq.) along with 3 mL of 1,4-dioxane was added, and the reaction was stirred at 100°C until complete conversion of the intermediate product. After removal of the solvent under reduced pressure, the residue was purified by flash column chromatography on silica gel (hexanes 0–25% ethyl acetate) to afford compound **S8** as a yellow oil (131 mg, 51%).

**HRMS** (ESI-TTOF)  $m/z$   $[M+H]^+$  calculated for  $C_9H_{13}O_3$  169.0859 found 169.0865

**<sup>1</sup>H NMR** (500 MHz, CDCl<sub>3</sub>): δ 6.81 (d, *J* = 10.2 Hz, 1H), 5.89 (d, *J* = 10.2 Hz, 1H), 3.67 (s, 3H), 2.50 – 2.33 (m, 3H), 1.95 – 1.85 (m, 1H), 1.37 (s, 3H).

**<sup>13</sup>C NMR** (125 MHz, CDCl<sub>3</sub>): δ 198.1, 174.4, 151.5, 128.6, 52.5, 43.7, 34.4, 32.4, 24.7;

#### Preparation of dimethyl 3-methyl-5-oxocyclopent-1-ene-1,3-dicarboxylate (**S14**):

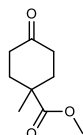

Compound **S8** (517 mg, 3.07 mmol, 1 eq.) was dissolved in ethyl acetate (3.11 mL) in a vial under a nitrogen atmosphere. 20.0 mg of 10% palladium on carbon was added and the reaction mixture was purged with hydrogen with a use of a balloon. After purging the atmosphere, three hydrogen balloons were attached to the vial and the mixture was vigorously stirred for 16 hours at 25°C. The reaction was monitored by HPLC-MS and when the starting material was consumed the reaction mixture was diluted with ethyl acetate and filtered through a pad of Celite which was washed two times with ethyl acetate. The solvent was evaporated under reduced pressure affording compound **S9** as a colorless oil without further purification (463 mg, 88%).

**HRMS** (ESI-TTOF) *m/z* [M+H]<sup>+</sup> calculated for C<sub>9</sub>H<sub>15</sub>O<sub>3</sub> 171.1021 found 171.1023

**<sup>1</sup>H NMR** (500 MHz, CDCl<sub>3</sub>): δ 3.76 (s, 3H), 2.47 – 2.37 (m, 4H), 2.36 – 2.27 (m, 2H), 1.75 – 1.63 (m, 2H), 1.31 (s, 3H).

**<sup>13</sup>C NMR** (125 MHz, CDCl<sub>3</sub>): δ 210.9, 176.8, 52.2, 42.5, 38.5, 35.3, 25.7;

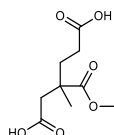

To a suspension of compound **S9** (400.0 mg, 2.35 mmol, 1 eq.) and KMnO<sub>4</sub> (742.8 mg, 4.70 mmol, 2 eq.) in water (14 mL) was added a solution of NaOH (35.0 mg, 0.869 mmol, 0.36 eq.) in water (2 mL). The reaction was stirred at 25°C for 16 h, over which time the solid dissolved. A saturated aqueous NaHSO<sub>3</sub> solution was added until the purple color disappeared. The reaction mixture was filtered through a pad of Celite which was washed two times with diethyl ether to remove the brown solid. The filtrate was acidified with conc. HCl to pH=1. The reaction was washed with diethyl ether three times, and the combined extracts were dried over anhydrous Na<sub>2</sub>SO<sub>4</sub>, the solvent was evaporated under reduced pressure, affording compound **S10** as a colorless oil without further purification (240.0 mg, 47%).

**HRMS** (ESI-TTOF) *m/z* [M+H]<sup>+</sup> calculated for C<sub>9</sub>H<sub>15</sub>O<sub>6</sub> 219.0868 found 219.0871

**<sup>1</sup>H NMR** (500 MHz, CDCl<sub>3</sub>): δ 3.69 (s, 3H), 2.77 (d, *J* = 16.5 Hz, 1H), 2.58 (d, *J* = 16.4, 1.4 Hz, 1H) 2.38 (t, *J* = 8.1 Hz, 2H), 2.03 (ddd, *J* = 14.1, 9.2, 6.8 Hz, 1H), 1.94 (ddd, *J* = 14.1, 9.4, 6.5 Hz, 1H), 1.30 (s, 3H).

**<sup>13</sup>C NMR** (125 MHz, CDCl<sub>3</sub>): δ 179.5, 177.4, 175.9, 52.4, 43.3, 42.5, 33.3, 29.4, 21.7;

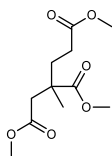

To compound **S10** (240.0 mg, 1.10 mmol, 1 eq.) in toluene (2.5 mL) was added MeOH (245  $\mu$ L, 6.05 mmol, 5.5 eq.) and cc. H<sub>2</sub>SO<sub>4</sub> (91  $\mu$ L, 1.70 mmol, 1.6 eq.). The reaction was stirred for 16 hours at 90°C and after cooling to 25°C the organic solvent was removed under reduced pressure. The residue was diluted with ethyl acetate and washed with a saturated NaHCO<sub>3</sub> solution and brine two times. The organic layer was dried over anhydrous Na<sub>2</sub>SO<sub>4</sub>, the solvent was evaporated under reduced pressure affording compound **S11** as a yellow oil without further purification (163.0 mg, 60%).

**HRMS** (ESI-TTOF)  $m/z$  [M+H]<sup>+</sup> calculated for C<sub>11</sub>H<sub>19</sub>O<sub>6</sub> 247.1181 found 247.1189

**<sup>1</sup>H NMR** (500 MHz, CDCl<sub>3</sub>):  $\delta$  3.70 (s, 3H), 3.67 (s, 3H), 3.66 (s, 3H), 2.76 (d,  $J$  = 15.9 Hz, 1H), 2.46 (d,  $J$  = 15.9 Hz, 1H), 2.38 – 2.23 (m, 2H), 2.01 (ddd,  $J$  = 14.0, 10.3, 6.0 Hz, 1H), 1.89 (ddd,  $J$  = 14.0, 10.2, 6.4 Hz, 1H), 1.27 (s, 3H).

**<sup>13</sup>C NMR** (125 MHz, CDCl<sub>3</sub>):  $\delta$  175.9, 173.5, 171.4, 52.2, 51.8, 51.7, 43.7, 42.7, 33.9, 29.5, 21.7;

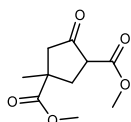

A solution of KO<sup>t</sup>Bu (111.4 mg, 0.993 mmol, 1.5 eq.) in anhydrous THF (1 mL) was cooled to 0°C and compound **S11** in anhydrous THF (1.5 mL) was added dropwise. The reaction was allowed to stir at 25°C for 1.5 hours, during which time it turned brown. Glacial acetic acid (0.20 mL) was added, resulting in a brownish solution containing a white precipitate. A solution of 0.40 g Na<sub>2</sub>HPO<sub>4</sub> in 1.45 mL of water was added, causing the suspension to become homogeneous. The organic layer was separated, and the aqueous layer was washed with chloroform three times. The combined organic layers were washed with brine, dried over anhydrous Na<sub>2</sub>SO<sub>4</sub>, the solvent was evaporated under reduced pressure. The resulting crude product was purified by flash chromatography (hexanes: ethyl acetate) to give compound **S12** as inseparable diastereomers as a yellow oil (50.0 mg, 35%).

**HRMS** (ESI-TTOF)  $m/z$  [M+H]<sup>+</sup> calculated for C<sub>10</sub>H<sub>15</sub>O<sub>5</sub> 215.0919 found 215.0922

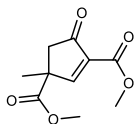

To a solution of compound **S12** (50.0 mg, 0.233 mmol, 1 eq.) in methylene chloride (0.1 mL) at 0°C was added pyridine (23 μL, 0.280 mmol, 1.2 eq.). After 5 minutes, a solution of phenylselenenyl chloride (53.6 mg, 0.280 mmol, 1.2 eq.) in methylene chloride (0.1 mL) was added dropwise. After 16 hours the reaction mixture was quenched with a saturated aqueous solution of ammonium chloride and washed twice with ethyl acetate. The combined organic layers were washed with water two times and dried over anhydrous Na<sub>2</sub>SO<sub>4</sub>. The solvent was evaporated under reduced pressure affording **S13** intermediate.

To a solution of the above prepared **S13** in methylene chloride (1 mL) was added m-CPBA (138.1 mg, 0.560 mmol, 2.4 eq.) at 0°C in small amounts. After 16 hours, water was added and the mixture was washed three times with methylene chloride. The organic layers were washed with a 5% NaHCO<sub>3</sub> solution and brine two times, dried over anhydrous Na<sub>2</sub>SO<sub>4</sub>. The solvent was evaporated under reduced pressure. The resulting crude product was purified by flash chromatography (hexanes: ethyl acetate) to give compound **S14** as a yellow oil (26.3 mg, 53%).

**HRMS** (ESI-TTOF) *m/z* [M+H]<sup>+</sup> calculated for C<sub>10</sub>H<sub>13</sub>O<sub>5</sub> 213.0762 found 213.0763

**<sup>1</sup>H NMR** (500 MHz, CDCl<sub>3</sub>): δ 8.20 (s, 1H), 3.82 (s, 3H), 3.73 (s, 3H), 3.11 (d, *J* = 18.9 Hz, 1H), 2.41 (d, *J* = 18.9 Hz, 1H), 1.53 (s, 3H).

**<sup>13</sup>C NMR** (125 MHz, CDCl<sub>3</sub>): δ 200.2, 172.9, 171.9, 161.9, 135.6, 53.2, 52.3, 49.0, 47.2, 24.4;

#### Preparation of 1-benzyl 3-methyl 3-methyl-5-oxocyclopent-1-ene-1,3-dicarboxylate (**S15**):

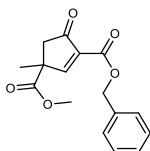

To a solution of compound **S14** (120.0 mg, 0.566 mmol, 1 eq.) in toluene (2.4 mL) was added benzyl-alcohol (588 μL, 5.66 mmol, 10 eq.) and the resulting mixture was stirred at 110 °C for 48 hours. After the starting material was fully consumed the volatiles were evaporated under reduced pressure. The crude product was purified by flash chromatography (hexanes: ethyl acetate) to give compound **S15** as a yellow oil (72.0 mg, 44%).

**HRMS** (ESI-TTOF) *m/z* [M+H]<sup>+</sup> calculated for C<sub>16</sub>H<sub>17</sub>O<sub>5</sub> 289.1075 found 289.1079

**<sup>1</sup>H NMR** (500 MHz, CDCl<sub>3</sub>): δ 8.20 (s, 1H), 7.43 (m, 2H), 7.40 – 7.31 (m, 3H), 5.28 (d, *J* = 2.3 Hz, 2H), 3.74 (s, 3H), 3.14 (d, *J* = 18.9 Hz, 1H), 2.42 (d, *J* = 18.9 Hz, 1H), 1.54 (s, 3H).

**<sup>13</sup>C NMR** (125 MHz, CDCl<sub>3</sub>): δ 200.1, 172.8, 171.6, 161.1, 135.4, 135.3, 128.6, 128.43, 128.41, 66.8, 53.1, 48.9, 47.0, 24.3;

**Preparation of 3-(methoxycarbonyl)-3-methyl-5-oxocyclopent-1-ene-1-carboxylic acid (S16):**

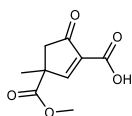

To a solution of compound **S15** (450.0 mg, 1.56 mmol, 1 eq.) in methylene chloride (9 mL) was added TFA (1.19 mL, 15.6 mmol, 10 eq.) and 98% sulfuric acid (10 drops, 0.5 mL) and the resulting mixture was stirred at 25°C for 10 minutes. After the starting material was consumed, the reaction mixture was diluted with 150 mL of water and was washed with methylene chloride three times. The combined organic layers were washed two times with brine, dried over anhydrous Na<sub>2</sub>SO<sub>4</sub>. The solvent was evaporated under reduced pressure affording compound **S16** as an off-white solid (309.0 mg, 99 %) and was used in the next step without further purification.

**HRMS** (ESI-TTOF) *m/z* [M+Na]<sup>+</sup> calculated for C<sub>9</sub>H<sub>10</sub>O<sub>5</sub>Na 221.0425 found 221.0428

**<sup>1</sup>H NMR** (500 MHz, CDCl<sub>3</sub>): δ 8.48 (s, 1H), 3.78 (s, 3H), 3.32 (d, *J* = 19.6 Hz, 1H), 2.57 (d, *J* = 19.6 Hz, 1H), 1.61 (s, 3H).

**<sup>13</sup>C NMR** (125 MHz, CDCl<sub>3</sub>): δ 206.2, 175.0, 172.1, 161.1, 133.1, 53.3, 49.7, 46.4, 24.0;

**Preparation of 1-(tert-butyl) 3-methyl 3-isopropyl-6-oxocyclohex-1-ene-1,3-dicarboxylate (S17R/S17S):**

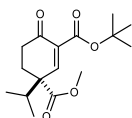

Following the **General Procedure A** using: **S1a** (1.00 g, 5.88 mmol), **S2b** (931.7 mg, 6.46 mmol) and catalyst **S3a/S3b** (80.5 mg, 0.118 mmol) in 1,4-dioxane (5.9 mL, 1.0 M) at 25°C for 3 days. After removal of the volatile compounds under reduced pressure, purification by flash chromatography on silica gel (hexanes 0-25% ethyl acetate) gave the product (**S17R/S17S**) as a colorless oil (0.883 g, 51% for **S17R**, 1.442 g, 83% for **S17S**).

*ee*: 99+% with catalyst **S3a** (**S17R**)

*ee*: -99+% with catalyst **S3b** (**S17S**)

**HRMS** (ESI-TTOF) *m/z* [M+H]<sup>+</sup> calculated for C<sub>16</sub>H<sub>25</sub>O<sub>5</sub> 297.1696 found 297.1687

**<sup>1</sup>H NMR** (300 MHz, CDCl<sub>3</sub>): δ 7.29 (d, *J* = 1.9 Hz, 1H), 3.72 (s, 3H), 2.57 – 2.41 (m, 2H), 2.35 (dddd, *J* = 13.6, 5.0, 4.0, 1.9 Hz, 1H), 2.23 (sept., *J* = 6.9 Hz, 1H), 1.95 (ddd, *J* = 13.7, 12.7, 5.1 Hz, 1H), 1.49 (s, 9H), 0.92 (dd, *J* = 13.1, 6.9 Hz, 6H).

**<sup>13</sup>C NMR** (75 MHz, CDCl<sub>3</sub>): δ 194.2, 172.7, 163.8, 154.0, 134.1, 52.6, 52.1, 36.0, 35.8, 28.2, 25.5, 17.8, 17.6;

**Preparation of 3-isopropyl-3-(methoxycarbonyl)-6-oxocyclohex-1-ene-1-carboxylic acid (S18R/S18S):**

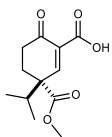

Trifluoroacetic acid (312  $\mu$ L, 4.05 mmol, 3 eq.) was added to a solution of compound **S17R/S17S** (400.0 mg, 1.35 mmol, 1 eq.) in methylene chloride (10.4 mL) and then the mixture was stirred at 25°C for 3 hours. The reaction was monitored by TLC and when it was completed the reaction mixture was evaporated. The remaining trifluoroacetic acid was removed by redissolving the mixture in toluene and evaporating to dryness at 50°C three times. Compound **S18R/S18S** was obtained as a yellow oil in quantitative yield (324.0 mg) and was used in the next step without further purification.

**HRMS** (ESI-TTOF)  $m/z$   $[M+H]^+$  calculated for  $C_{12}H_{17}O_5$  241.1070 found 241.1062

**$^1H$  NMR** (500 MHz,  $CDCl_3$ ):  $\delta$  8.27 (d,  $J$  = 1.9 Hz, 1H), 3.76 (s, 3H), 2.73 – 2.64 (m, 2H), 2.51 – 2.41 (m, 1H), 2.35 (sept.,  $J$  = 6.9 Hz, 1H), 2.04 (ddd,  $J$  = 13.8, 10.5, 7.7 Hz, 1H), 0.98 (dd,  $J$  = 12.8, 6.9 Hz, 6H).

**$^{13}C$  NMR** (125 MHz,  $CDCl_3$ ):  $\delta$  202.6, 171.5, 165.4, 163.6, 53.4, 53.0, 36.1, 35.0, 25.4, 18.0, 17.6;

**Preparation of 1-(tert-butyl) 3-methyl-3-allyl-6-oxocyclohex-1-ene-1,3-dicarboxylate (S19R/S19S):**

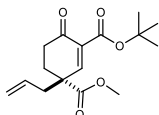

Following the **General Procedure A** using: **S1a** (14.3 g, 83.8 mmol), **S2c** (13.1 g, 92.2 mmol) and catalyst **S3a/S3b** (1.15 g, 1.68 mmol) in 1,4-dioxane (84 mL, 1.0 M) at 25°C for 2 days. After removal of the volatile compounds under reduced pressure, purification by flash chromatography on silica gel (hexanes 0-25% ethyl acetate) gave the product as a yellow oil (12.1 g, 49% for **S19R**, 18.4 g, 75% for **S19S**).

**ee**: 99+% with catalyst **S3a** (**S19R**)

**ee**: -99+% with catalyst **S3b** (**S19S**)

**HRMS** (ESI-TTOF)  $m/z$   $[M+H]^+$  calculated for  $C_{16}H_{23}O_5$  295.1540 found 295.1543

**$^1H$  NMR** (500 MHz,  $CDCl_3$ ):  $\delta$  7.35 (s,  $J$  = 4.7 Hz, 1H), 5.72 – 5.62 (m, 1H), 5.19 – 5.11 (m, 2H), 3.73 (s, 3H), 2.52 (ddt,  $J$  = 16.2, 11.3, 5.4 Hz, 4H), 2.47 – 2.34 (m, 1H), 2.03 – 1.95 (m, 1H), 1.51 – 1.49 (s, 9H).

**$^{13}C$  NMR** (125 MHz,  $CDCl_3$ ):  $\delta$  193.7, 172.6, 163.7, 152.8, 133.9, 131.5, 120.2, 82.3, 52.7, 48.2, 42.8, 35.4, 29.8, 28.1;

### Preparation of 3-(*tert*-butyl) 1-methyl 6-methylene-4-oxobicyclo[3.2.1]oct-2-ene-1,3-dicarboxylate (**S20R,R/S20S,S**):

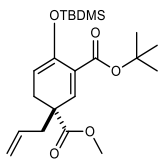

A flame-dried vial was charged with an anhydrous toluene solution (3.5 mL) of compound **S19R/S19S** (1.00 g, 3.40 mmol, 1 eq.) and triethylamine (940  $\mu$ L, 6.79 mmol, 2 eq.) under a nitrogen atmosphere. The reaction mixture was cooled to 0°C then TBDMSOTf (936  $\mu$ L, 4.08 mmol, 1.2 eq.) was added dropwise, and it was stirred at 0°C for 2 hours. When the reaction was completed, the mixture was diluted with water and extracted with n-Hexane three times. The combined organic phases were washed two times with a saturated NaHCO<sub>3</sub> solution and once with brine, dried over anhydrous Na<sub>2</sub>SO<sub>4</sub>, filtered and the solvent was removed under reduced pressure. The silyl-enol ether intermediate was obtained as a colorless oil (1.307 g, 94%) and was used without further purification in the next step.

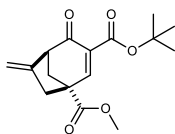

To an anhydrous dimethyl sulfoxide (18 mL) solution of the intermediate were added 4 Å molecular sieves, and Pd(OAc)<sub>2</sub> (71.8mg, 320.0 mg, 0.1 eq.), and the atmosphere was charged with 3 bars of O<sub>2</sub>. The reaction mixture was stirred at 60°C for 18 hours. After completion, the reaction mixture was cooled to 25°C and 50 mL of diethyl-ether was added and it was stirred for a further 1 hour. The reaction mixture was filtered through a pad of Celite then it was washed with water twice. The aqueous phase was extracted with 30 mL of diethyl-ether three times, then the combined organic phases were washed three times with brine. The organic phase was dried over anhydrous Na<sub>2</sub>SO<sub>4</sub>, filtered and the solvent was removed under reduced pressure. Purification by flash chromatography on silica gel (hexanes, 0-25% ethyl acetate) to give the product as a white solid (214,8 mg, 46% for **S20S,S**, 179.0 mg, 38% for **S20R,R**).

*ee*: 99+% with catalyst **S3a** (**S20S,S**)

*ee*: -99+% with catalyst **S3b** (**S20R,R**)

**HRMS** (ESI-TTOF) *m/z* [M+H]<sup>+</sup> calculated for C<sub>16</sub>H<sub>21</sub>O<sub>5</sub> 293.1383 found 293.1377

**<sup>1</sup>H NMR** (500 MHz, CDCl<sub>3</sub>):  $\delta$  8.03 (d, *J* = 1.9 Hz, 1H), 5.39 – 5.33 (m, 1H), 5.14 (d, *J* = 1.2 Hz, 1H), 3.82 (s, 3H), 3.60 (dt, *J* = 4.8, 1.0 Hz, 1H), 3.01 – 2.92 (m, 1H), 2.73 – 2.60 (m, 1H), 2.41 – 2.25 (m, 2H), 1.51 (s, 9H).

**<sup>13</sup>C NMR** (125 MHz, CDCl<sub>3</sub>):  $\delta$  192.0, 163.0, 155.7, 142.0, 131.0, 114.0, 82.2, 58.5, 52.9, 51.8, 42.2, 41.1, 28.2;

### Preparation of 1-(methoxycarbonyl)-6-methylene-4-oxobicyclo[3.2.1]oct-2-ene-3-carboxylic acid (**S21S,S/S21R,R**):

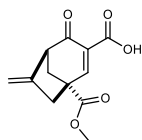

Trifluoroacetic acid (158  $\mu$ L, 2.05 mmol, 3 eq.) was added to a solution of compound **S20S,S/S20R,R** (200.0 mg, 0.684 mmol, 1 eq.) in methylene chloride (4.0 mL) and then the mixture was stirred at 25°C for 3 hours. The reaction was monitored by TLC and when it was completed the reaction mixture was evaporated. The remaining trifluoroacetic acid was removed by redissolving the mixture in toluene and evaporating to dryness at 50°C three times. Compound **S21S,S/S21R,R** was obtained as a yellow oil in quantitative yield (160.0 mg) and was used in the next step without further purification.

**HRMS** (ESI-TTOF)  $m/z$   $[M+H]^+$  calculated for  $C_{12}H_{13}O_5$  237.0757 found 237.0762

**$^1H$  NMR** (500 MHz,  $CDCl_3$ ):  $\delta$  8.80 (d,  $J$  = 2.0 Hz, 1H), 5.45 (t,  $J$  = 1.7 Hz, 1H), 5.29 – 5.24 (m, 1H), 3.85 (s, 3H), 3.76 (d,  $J$  = 4.9 Hz, 1H), 3.07 (dt,  $J$  = 16.1, 2.6 Hz, 1H), 2.68 – 2.62 (m, 1H), 2.45 (ddd,  $J$  = 11.8, 4.9, 2.1 Hz, 1H), 2.36 (dd,  $J$  = 11.9, 2.5 Hz, 1H).

**$^{13}C$  NMR** (125 MHz,  $CDCl_3$ ):  $\delta$  199.6, 171.3, 164.5, 163.1, 140.4, 124.8, 116.0, 57.0, 53.1, 52.6, 42.5, 40.1;

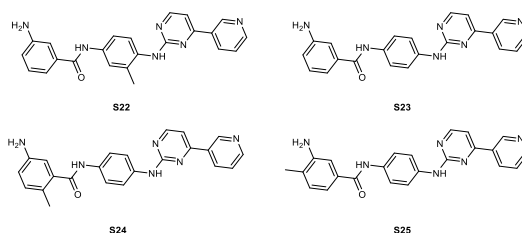

Compounds **S22** (IN-8), **S23** (IN-7), **S24** (IN-9), and **S25** (IN-10) were synthesized according to the literature procedures.<sup>1</sup>

**Preparation of methyl 1-methyl-3-((3-((3-methyl-4-((4-(pyridin-3-yl)pyrimidin-2-yl)amino)phenyl)carbamoyl)phenyl)carbamoyl)-4-oxocyclohex-2-ene-1-carboxylate (1aR-IN-8 and 1aS-IN-8):**

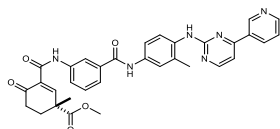

Compound **S5R/S5S** (87.5 mg, 0.412 mmol, 1.5 eq.) was dissolved in anhydrous dimethylformamide (1.125 mL) in a flame-dried vial under a nitrogen atmosphere, HBTU (156.0 mg, 0.412 mmol, 1.5 eq.) and *N*-methylmorpholine (91  $\mu$ L, 0.825 mmol, 3.0 eq.) were added and the mixture was stirred at 25°C. After 30 minutes an anhydrous DMF solution (1.125 mL) of compound **S22** (109 mg, 0.275 mmol, 1 eq.) was added and the reaction mixture was stirred at 25°C for 3 days. The reaction was monitored by HPLC-MS and when the starting material was consumed the reaction mixture was diluted with ethyl acetate, washed two times with a 5% citric acid solution, two times with a saturated aqueous  $Na_2CO_3$  solution, and two times with brine. The organic phase was dried over anhydrous  $Na_2SO_4$ , filtered, then evaporated



under reduced pressure. The resulting crude product was purified by preparative RP-HPLC using a gradient method on a Gemini® 5µm C18 110 Å column (H<sub>2</sub>O:MeCN = 95:5 (0.1 % HCOOH) to 100% MeCN (0.1 % HCOOH)). The target compound was obtained as a yellow solid (41.8 mg, 26% for **1aR-IN-8** 40.2 mg, 25% for **1aS-IN-8**).

**HRMS** (ESI-TTOF) *m/z* [M+H]<sup>+</sup> calculated for C<sub>33</sub>H<sub>31</sub>N<sub>6</sub>O<sub>5</sub> 591.2355 found 591.2377

**<sup>1</sup>H NMR** (500 MHz, CDCl<sub>3</sub>): δ 10.86 (s, 1H), 9.22 (d, *J* = 2.3 Hz, 1H), 8.75 – 8.64 (m, 1H), 8.47 (d, *J* = 5.1 Hz, 1H), 8.37 – 8.32 (m, 1H), 8.26 (s, 1H), 8.21 (t, *J* = 1.9 Hz, 1H), 8.09 (s, 1H), 7.99 (d, *J* = 8.7 Hz, 1H), 7.83 – 7.73 (m, 1H), 7.67 (d, *J* = 7.7 Hz, 1H), 7.62 (d, *J* = 2.5 Hz, 1H), 7.53 – 7.50 (m, 1H), 7.46 – 7.39 (m, 2H), 7.14 (d, *J* = 5.1 Hz, 1H), 6.98 (s, 1H), 3.77 (s, 3H), 2.77 – 2.57 (m, 2H), 2.57 – 2.50 (m, 1H), 2.36 (s, 3H), 2.03 (ddd, *J* = 14.4, 9.9, 5.0 Hz, 1H), 1.55 (s, 3H).

**<sup>13</sup>C NMR** (125 MHz, CDCl<sub>3</sub>): δ 199.6, 173.4, 165.3, 162.7, 162.0, 161.1, 160.8, 159.3, 151.6, 148.6, 138.4, 136.1, 134.6, 134.2, 134.0, 132.9, 130.4, 129.6, 129.1, 123.8, 123.7, 123.1, 122.7, 118.8, 118.7, 108.1, 53.1, 45.2, 36.0, 32.1, 24.8, 18.4;

**Preparation of methyl 1-methyl-3-((3-((3-methyl-4-((4-(pyridin-3-yl)pyrimidin-2-yl)amino)phenyl)carbamoyl)phenyl)carbamoyl)-4-oxocyclohex-2-ene-1-carboxylate (2-IN-8):**

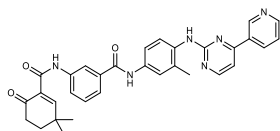

Compound **S11** (85.0 mg, 0.504 mmol, 2 eq.) was dissolved in anhydrous dimethylformamide (0.935 mL) in a flame-dried vial under a nitrogen atmosphere, HBTU (192.0 mg, 0.504 mmol, 2 eq.) and *N*-methylmorpholine (111 µL, 1.009 mmol, 4.0 eq.) were added and the mixture was stirred at 25°C. After 30 minutes an anhydrous DMF solution (0.935 mL) of compound **S22** (100 mg, 0.252 mmol, 1 eq.) was added and the reaction mixture was stirred at 25°C for 3 days. The reaction was monitored by HPLC-MS and when the starting material was consumed the reaction mixture was diluted with ethyl acetate, washed two times with a 5% citric acid solution, two times with a saturated aqueous Na<sub>2</sub>CO<sub>3</sub> solution, and two times with brine. The organic phase was dried over anhydrous Na<sub>2</sub>SO<sub>4</sub>, filtered, then evaporated under reduced pressure. The resulting crude product was purified by preparative RP-HPLC using a gradient method on a Gemini® 5µm C18 110 Å column (H<sub>2</sub>O:MeCN = 95:5 (0.1 % HCOOH) to 100% MeCN (0.1 % HCOOH)). Compound **2-IN-8** was obtained as a yellow solid (31.0 mg, 22%).

**HRMS** (ESI-TTOF) *m/z* [M+H]<sup>+</sup> calculated for C<sub>32</sub>H<sub>31</sub>N<sub>6</sub>O<sub>3</sub> 547.2457 found 547.2457

**<sup>1</sup>H NMR** (500 MHz, CDCl<sub>3</sub>): δ 10.94 (s, 1H), 9.22 (s, 1H), 8.74 – 8.64 (m, 1H), 8.46 (d, *J* = 5.1 Hz, 1H), 8.34 (dt, *J* = 8.0, 1.9 Hz, 1H), 8.18 (d, *J* = 1.8 Hz, 2H), 8.07 (s, 1H), 7.97 (d, *J* = 8.6 Hz, 1H), 7.78 (ddd, *J* = 8.1, 2.1, 1.1 Hz, 1H), 7.65 (dt, *J* = 7.8, 1.3 Hz, 1H), 7.62 (d, *J* = 2.5 Hz, 1H), 7.52 (dd, *J* = 8.7, 2.5 Hz, 1H), 7.44 – 7.38 (m, 2H), 7.13 (d, *J* = 5.2 Hz, 1H), 7.05 (s, 1H), 2.63 (dd, *J* = 7.5, 6.2 Hz, 2H), 2.34 (s, 3H), 1.92 (t, *J* = 6.8 Hz, 2H), 1.26 (s, 6H).

**<sup>13</sup>C NMR** (125 MHz, CDCl<sub>3</sub>): δ 200.5, 170.4, 165.4, 162.6, 161.4, 161.0, 159.2, 151.5, 148.5, 138.5, 136.0, 134.7, 134.2, 133.9, 132.8, 130.4, 129.6, 127.5, 123.8, 123.6, 123.5, 123.1, 122.6, 118.74, 118.71, 108.0, 35.7, 35.4, 34.3, 27.3, 18.4;

### Preparation of 3-(3,3-dimethyl-5-oxocyclopent-1-ene-1-carboxamido)-*N*-(3-methyl-4-((4-(pyridin-3-yl)pyrimidin-2-yl)amino)phenyl)benzamide (3-IN-8):

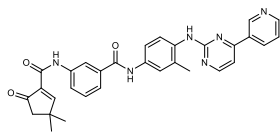

Compound **S25** (77.8 mg, 0.504 mmol, 2 eq.) was dissolved in anhydrous dimethylformamide (1.10 mL) in a flame-dried vial under a nitrogen atmosphere, HBTU (191.3 mg, 0.504 mmol, 2 eq.) and *N*-methylmorpholine (111  $\mu$ L, 1.01 mmol, 4 eq.) were added and the mixture was stirred at 25°C. After 30 minutes a DMF solution (1.10 mL) of compound **S22** (100.0 mg, 0.252 mmol, 1 eq.) was added and the reaction mixture was stirred at 25°C for 16 hours. The reaction was monitored by HPLC-MS and when the starting material was consumed the reaction mixture was diluted with ethyl acetate, washed two times with a 5% citric acid solution, two times with a saturated aqueous Na<sub>2</sub>CO<sub>3</sub> solution, and two times with brine. The organic phase was dried over anhydrous Na<sub>2</sub>SO<sub>4</sub>, filtered, then evaporated under reduced pressure. The resulting crude product was purified by preparative RP-HPLC using a gradient method on a Gemini<sup>®</sup> 5  $\mu$ m C18 110 Å column (H<sub>2</sub>O:MeCN = 95:5 (0.1 % HCOOH) to 100% MeCN (0.1 % HCOOH)). Compound **3-IN-8** was obtained as a yellow solid (39.5 mg, 29%).

**HRMS** (ESI-TTOF) *m/z* [M+H]<sup>+</sup> calculated for C<sub>31</sub>H<sub>29</sub>N<sub>6</sub>O<sub>3</sub> 533.2301 found 533.2303

**<sup>1</sup>H NMR** (500 MHz, CDCl<sub>3</sub>):  $\delta$  10.06 (s, 1H), 9.22 (s, 1H), 8.73 – 8.65 (m, 1H), 8.46 (d, *J* = 5.1 Hz, 1H), 8.38 (d, *J* = 6.3 Hz, 1H), 8.35 (d, *J* = 8.1 Hz, 1H), 8.18 (d, *J* = 4.5 Hz, 2H), 7.95 (d, *J* = 8.8 Hz, 1H), 7.80 (dd, *J* = 8.0, 2.0 Hz, 1H), 7.66 (d, *J* = 7.8 Hz, 1H), 7.62 (d, *J* = 2.5 Hz, 1H), 7.52 (dd, *J* = 8.7, 2.5 Hz, 1H), 7.43 – 7.39 (m, 2H), 7.13 (d, *J* = 4.5 Hz, 2H), 3.90 (s, 1H), 2.55 (s, 3H), 2.34 (s, 3H), 1.31 (s, 6H).

**<sup>13</sup>C NMR** (125 MHz, CDCl<sub>3</sub>):  $\delta$  207.6, 181.5, 165.3, 162.6, 161.0, 159.2, 159.1, 151.2, 148.3, 138.1, 136.1, 134.9, 134.5, 134.3, 133.9, 130.6, 129.6, 125.8, 124.8, 123.6, 123.4, 123.3, 122.7, 118.8, 118.7, 108.0, 51.5, 39.1, 27.5, 18.4;

### Preparation of methyl 1-methyl-3-((3-((3-methyl-4-((4-(pyridin-3-yl)pyrimidin-2-yl)amino)phenyl)carbamoyl)phenyl)carbamoyl)-4-oxocyclopent-2-ene-1-carboxylate (4-IN-8):

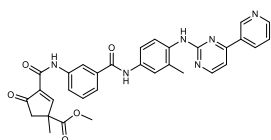

Compound **S34** (30.0 mg, 0.151 mmol, 1 eq.) was dissolved in anhydrous dimethylformamide (0.375 mL) in a flame-dried vial under a nitrogen atmosphere, HBTU (57.4 mg, 0.151 mmol, 1 eq.) and *N*-methylmorpholine (75  $\mu$ L, 0.681 mmol, 4.5 eq.) were added and the mixture was stirred at 25°C. After 30 minutes a DMF solution (0.375 mL) of compound **S22** (90.0 mg, 0.227 mmol, 1.5 eq.) was added and the reaction mixture was stirred at 25°C for 16 hours. The reaction was monitored by HPLC-MS and when the starting material was consumed the reaction mixture was diluted with ethyl acetate, washed two times with a 5% citric acid solution, two times with a saturated aqueous Na<sub>2</sub>CO<sub>3</sub> solution and two times with brine. The organic phase was dried

over anhydrous Na<sub>2</sub>SO<sub>4</sub>, filtered, then evaporated under reduced pressure. The resulting crude product was purified by preparative RP-HPLC using a gradient method on a Gemini® 5µm C18 110 Å column (H<sub>2</sub>O:MeCN = 95:5 (0.1 % HCOOH) to 100% MeCN (0.1 % HCOOH)). Compound **4-IN-8** was obtained as a yellow solid (22.2 mg, 25%).

**HRMS** (ESI-TTOF) *m/z* [M+H]<sup>+</sup> calculated for C<sub>32</sub>H<sub>29</sub>N<sub>6</sub>O<sub>5</sub> 577.2193 found 577.2193

**<sup>1</sup>H NMR** (500 MHz, CDCl<sub>3</sub>): δ 9.31 (s, 1H), 8.80 (s, 1H), 8.55 – 8.5 (m, 1H), 8.50 (s, 1H), 8.45 – 8.42 (m, 1H), 8.24-8.22 (m, 1H), 7.76 (d, *J* = 8.7 Hz, 1H), 7.73 (d, *J* = 1.8 Hz, 1H), 7.72 – 7.71 (m, 1H), 7.67 – 7.65 (m, 1H), 7.61 (d, *J* = 2.4 Hz, 1H), 7.59 (d, *J* = 2.3 Hz, 1H), 7.49 (t, *J* = 7.9 Hz, 1H), 7.24 (d, *J* = 5.6 Hz, 1H), 3.78 (s, 3H), 3.34 (d, *J* = 19.3 Hz, 1H), 2.59 (d, *J* = 19.3 Hz, 1H), 2.37 (s, 3H), 1.62 (s, 3H).

**<sup>13</sup>C NMR** (125 MHz, CDCl<sub>3</sub>): δ 205.5, 173.3, 172.5, 165.7, 158.6, 158.5, 137.0, 136.9, 136.1, 136.0, 135.8, 129.6, 125.0, 123.7, 123.6, 122.8, 122.6, 119.1, 119.0, 118.7, 118.6, 107.1, 53.2, 49.8, 49.6, 49.4, 49.3, 49.1, 49.0, 47.3, 24.1, 18.2;

**Preparation of methyl 1-isopropyl-3-((3-((3-methyl-4-((4-(pyridin-3-yl)pyrimidin-2-yl)amino)phenyl)carbamoyl)phenyl)carbamoyl)-4-oxocyclohex-2-ene-1-carboxylate (5R-IN-8 and 5S-IN-8):**

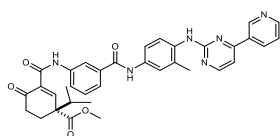

Compound **S21R/S21S** (13.9 mg, 0.058 mmol, 1.25 eq.) was dissolved in anhydrous dimethylformamide (0.154 mL) in a flame-dried vial under a nitrogen atmosphere, HBTU (21.9 mg, 0.058 mmol, 1.25 eq.) and *N*-methylmorpholine (13 µL, 0.116 mmol, 2.5 eq.) were added and the mixture was stirred at 25°C. After 30 minutes an anhydrous DMF solution (0.154 mL) of compound **S22** (20.0 mg, 0.046 mmol, 1 eq.) was added and the reaction mixture was stirred at 25°C for 3 days. The reaction was monitored by HPLC-MS and when the starting material was consumed the reaction mixture was diluted with ethyl acetate, washed two times with a 5% citric acid solution, two times with a saturated aqueous Na<sub>2</sub>CO<sub>3</sub> solution, and two times with brine. The organic phase was dried over anhydrous Na<sub>2</sub>SO<sub>4</sub>, filtered, then evaporated under reduced pressure. The resulting crude product was purified by preparative RP-HPLC using a gradient method on a Gemini® 5µm C18 110 Å column (H<sub>2</sub>O:MeCN = 95:5 (0.1 % HCOOH) to 100% MeCN (0.1 % HCOOH)). The target compound was obtained as a yellow solid (15.6 mg, 55% for **5R-IN-8**, 7.7 mg, 27 % for **5S-IN-8**).

**HRMS** (ESI-TTOF) *m/z* [M+H]<sup>+</sup> calculated for C<sub>35</sub>H<sub>35</sub>N<sub>6</sub>O<sub>5</sub> 619.2663 found 619.2668

**<sup>1</sup>H NMR** (500 MHz, CDCl<sub>3</sub>): δ 10.91 (s, 1H), 9.26 (s, 1H), 8.73 (s, 1H), 8.48 (d, *J* = 5.1 Hz, 1H), 8.35 (d, *J* = 7.9 Hz, 1H), 8.27 (d, *J* = 1.8 Hz, 1H), 8.25 (s, 1H), 8.02 – 7.96 (m, 2H), 7.79 (dt, *J* = 8.0, 1.5 Hz, 1H), 7.69 – 7.66 (m, 1H), 7.62 (d, *J* = 2.5 Hz, 1H), 7.52 (dd, *J* = 8.7, 2.6 Hz, 1H), 7.45 (t, *J* = 7.9 Hz, 1H), 7.15 (d, *J* = 5.1 Hz, 1H), 6.98 (s, 1H), 5.29 (s, 1H), 3.76 (s, 3H), 2.76 – 2.57 (m, 2H), 2.51 – 2.41 (m, 1H), 2.37 (s, 3H), 2.04 (td, *J* = 13.3, 5.4 Hz, 1H), 0.98 (dd, *J* = 14.0, 6.9 Hz, 6H).

<sup>13</sup>C NMR (125 MHz, CDCl<sub>3</sub>): δ 200.2, 172.3, 165.3, 162.8, 162.1, 161.0, 160.8, 159.0, 151.4, 148.4, 138.5, 136.1, 134.9, 134.2, 133.9, 130.5, 129.9, 129.7, 123.7, 123.2, 122.7, 118.8, 118.7, 108.1, 53.2, 52.9, 36.5, 36.1, 25.6, 18.5, 18.0, 17.7;

**Preparation of methyl 3-((3-((3-methyl-4-((4-(pyridin-3-yl)pyrimidin-2-yl)amino)phenyl)carbamoyl)phenyl)carbamoyl)-6-methylene-4-oxobicyclo[3.2.1]oct-2-ene-1-carboxylate (6S,S-IN-8 and 6R,R-IN-8):**

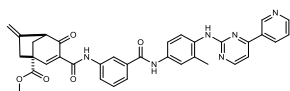

Compound **S24S,S/S24R,R** (15.0 mg, 0.064 mmol, 1.25 eq.) was dissolved in anhydrous dimethylformamide (0.170 mL) in a flame-dried vial under a nitrogen atmosphere, HBTU (24.1 mg, 0.064 mmol, 1.25 eq.) and *N*-methylmorpholine (14 μL, 0.127 mmol, 2.5 eq.) were added and the mixture was stirred at 25°C. After 30 minutes an anhydrous DMF solution (0.170 mL) of compound **S22** (22 mg, 0.051 mmol, 1 eq.) was added and the reaction mixture was stirred at 25°C for 3 days. The reaction was monitored by HPLC-MS and when the starting material was consumed the reaction mixture was diluted with ethyl acetate, washed two times with a 5% citric acid solution, two times with a saturated aqueous Na<sub>2</sub>CO<sub>3</sub> solution, and two times with brine. The organic phase was dried over anhydrous Na<sub>2</sub>SO<sub>4</sub>, filtered, then evaporated under reduced pressure. The resulting crude product was purified by preparative RP-HPLC using a gradient method on a Gemini<sup>®</sup> 5 μm C18 110 Å column (H<sub>2</sub>O:MeCN = 95:5 (0.1 % HCOOH) to 100% MeCN (0.1 % HCOOH)). The target compound was obtained as a yellow solid (5.7 mg, 18% for **6S,S-IN-8**, 9.7 mg, 31% for **6R,R-IN-8**).

**HRMS** (ESI-TTOF) *m/z* [M+H]<sup>+</sup> calculated for C<sub>35</sub>H<sub>31</sub>N<sub>6</sub>O<sub>5</sub> 615.2350 found 615.2350

<sup>1</sup>H NMR (500 MHz, CDCl<sub>3</sub>): δ 10.68 (s, 1H), 9.25 (s, 1H), 8.80 (d, *J* = 1.8 Hz, 1H), 8.74 (s, 1H), 8.49 (d, *J* = 5.2 Hz, 1H), 8.41 (dt, *J* = 8.0, 1.8 Hz, 1H), 8.23 (t, *J* = 2.0 Hz, 1H), 7.98 (d, *J* = 8.6 Hz, 1H), 7.93 (s, 1H), 7.81 – 7.77 (m, 1H), 7.68 (dd, *J* = 7.8, 1.7 Hz, 1H), 7.63 (d, *J* = 2.5 Hz, 1H), 7.18 (d, *J* = 5.2 Hz, 1H), 5.43 (s, 1H), 5.22 (s, 1H), 3.86 (s, 3H), 3.74 (d, *J* = 4.7 Hz, 1H), 3.05 (dt, *J* = 16.1, 2.7 Hz, 1H), 2.67 (d, *J* = 16.1 Hz, 1H), 2.45 – 2.40 (m, 1H), 2.39 (s, 3H), 2.04 (s, 2H), 1.68 (s, 3H).

<sup>13</sup>C NMR (125 MHz, CDCl<sub>3</sub>): δ 197.8, 172.2, 165.3, 161.7, 160.7, 151.1, 148.1, 141.5, 138.4, 136.1, 135.3, 134.4, 133.7, 130.7, 129.7, 128.1, 125.2, 123.73, 123.65, 123.4, 122.7, 118.74, 118.71, 115.1, 108.0, 58.5, 53.1, 52.7, 42.6, 40.6, 32.4, 29.8, 26.6, 23.6, 18.5;

**Preparation of 3-((1,3-dioxoisindolin-2-yl)methyl)-*N*-(3-methyl-4-((4-(pyridin-3-yl)pyrimidin-2-yl)amino)phenyl)benzamide (S26):**

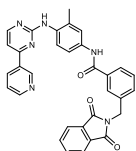

3-((1,3-dioxoisindolin-2-yl)methyl)benzoic acid (0.140 g, 0.50 mmol, 1.25 eq.) was dissolved in anhydrous DMF (3 mL) under a nitrogen atmosphere and HBTU (0.192 g, 0.50 mmol, 1.25 eq.) and *N*-methyl-morpholine (504 μL, 0.455 g, 1.5 mmol) were added to the solution. Then the reaction mixture was stirred for 10 minutes and 2-methyl-*N*-(4-(pyridin-3-yl)pyrimidin-2-

yl)benzene-1,4-diamine (0.110 g, 0.40 mmol, 1 eq.) was added. After that, the reaction mixture was stirred for 16 hours at 25°C. After that, the reaction mixture was diluted with ethyl acetate and was washed with a 10% citric acid solution two times and brine four times. The organic phase was dried over Na<sub>2</sub>SO<sub>4</sub>. Then it was filtered and evaporated under reduced pressure. The residue was purified by flash column chromatography on silica gel using methylene chloride: methanol = 9:1 as eluent. Compound **S26** was obtained as yellow crystals (120.0 mg, 44%).

m.p. 118-123 °C.

**HRMS** (ESI-TTOF) m/z [M+H]<sup>+</sup> calculated for C<sub>32</sub>H<sub>25</sub>N<sub>6</sub>O<sub>3</sub> 541.1988 found 541.1984

**<sup>1</sup>H NMR** (500 MHz, CD<sub>3</sub>OD): δ 9.25 (s, 1H), 8.71 (d, *J* = 5.0 Hz, 1H), 8.46 (d, *J* = 5.3 Hz, 1H), 8.41 (d, *J* = 8.0 Hz, 1H), 8.31 (s, 1H), 8.13 (s, 1H), 7.99 (d, *J* = 7.8 Hz, 1H), 7.95 (s, 1H), 7.84-7.80 (m, 6H), 7.70-7.68 (m, 5H), 7.65-7.60 (m, 3H), 7.57 (d, *J* = 7.8 Hz, 1H), 7.51-7.49 (m, 2H), 7.42-7.37 (m, 3H), 7.33-7.30 (m, 1H), 7.16 (d, *J* = 5.3 Hz, 1H), 4.88 (s, 2H), 2.34 (s, 3H).

**<sup>13</sup>C NMR** (125 MHz, CD<sub>3</sub>OD): δ 169.5, 168.1, 162.5, 160.5, 158.3, 150.1, 147.3, 137.1, 136.8, 136.2, 135.7, 134.2, 133.2, 132.2, 131.5, 131.0, 130.1, 129.6, 129.3, 128.9, 126.7, 125.2, 124.0, 123.6, 122.8, 118.8, 118.5, 110.5, 107.7, 41.5, 38.7.

#### Preparation of 3-(aminomethyl)-*N*-(3-methyl-4-((4-(pyridin-3-yl)pyrimidin-2-yl)amino)phenyl)benzamide (**S27**):

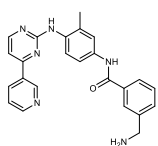

**S26** (0.120 g, 0.222 mmol, 1 eq.) was dissolved in methanol (2 mL) and hydrazine hydrate (35 μL, 0.036 g, 0.710 mmol, 3.5 eq.) was added to the solution. After that the reaction mixture was stirred at 25°C for 48 hours. The white suspension formed was filtered and the filtrate was evaporated under reduced pressure. Compound **S27** was obtained as yellow crystals (20.0 mg, 22%) and was used for next step without further purification.

**HRMS** (ESI-TTOF) m/z [M+H]<sup>+</sup> calculated for C<sub>24</sub>H<sub>23</sub>N<sub>6</sub>O 411.1933 found 411.1936

**<sup>1</sup>H NMR** (500 MHz, CDCl<sub>3</sub>): δ 9.22 (s, 1H), 8.68 (d, *J* = 4.9 Hz, 1H), 8.45 (d, *J* = 5.2 Hz, 1H), 8.31 (d, *J* = 7.3 Hz, 1H), 8.24 (s, 1H), 7.94 (d, *J* = 8.6 Hz, 1H), 7.88 (s, 1H), 7.75 (d, *J* = 7.6 Hz, 1H), 7.62 (s, 1H), 7.52 – 7.47 (m, 1H), 7.45 (d, *J* = 7.4 Hz, 1H), 7.41 – 7.37 (m, 2H), 5.29 (s, 1H), 3.93 (s, 2H), 2.32 (s, 3H).

**<sup>13</sup>C NMR** (125 MHz, CDCl<sub>3</sub>) partial: δ 165.8, 162.7, 161.1, 159.3, 151.6, 148.6, 135.5, 134.6, 134.3, 134.0, 132.8, 130.8, 130.5, 129.0, 126.1, 125.9, 123.8, 123.2, 122.7, 118.8, 108.1, 18.4;

**Preparation of methyl 1-methyl-3-((3-((3-methyl-4-((4-(pyridin-3-yl)pyrimidin-2-yl)amino)phenyl)carbamoyl)benzyl)carbamoyl)-4-oxocyclohex-2-ene-1-carboxylate (1a'R-IN-8):**

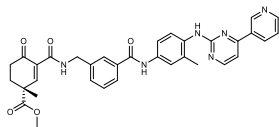

Compound **S5R** (23.3mg, 0.110 mmol, 1.5 eq.) was dissolved in anhydrous dimethylformamide (0.25 mL) in a flame-dried vial under a nitrogen atmosphere, HBTU (41.6 mg, 0.110mmol, 1.5 eq.) and *N*-methylmorpholine (24  $\mu$ L, 0.220 mmol, 3 eq.) were added and the mixture was stirred at 25°C. After 30 minutes a DMF solution (0.25 mL) of compound **S27** (30.0 mg, 0.073mmol, 1 eq.) was added and the reaction mixture was stirred at 25°C for 3 days. The reaction was monitored by HPLC-MS and when the starting material was consumed the reaction mixture was diluted with ethyl acetate, washed two times with a 5% citric acid solution, two times with a saturated aqueous  $\text{Na}_2\text{CO}_3$  solution, and two times with brine. The organic phase was dried over anhydrous  $\text{Na}_2\text{SO}_4$ , filtered, then evaporated under reduced pressure. The resulting crude product was purified by preparative RP-HPLC using a gradient method on a Gemini<sup>®</sup> 5 $\mu$ m C18 110 Å column ( $\text{H}_2\text{O}:\text{MeCN} = 95:5$  (0.1 %  $\text{HCOOH}$ ) to 100% MeCN (0.1 %  $\text{HCOOH}$ )). Compound **1a'R-IN-8** was obtained as a yellow solid (13.3 mg, 30%).

**HRMS** (ESI-TTOF)  $m/z$   $[\text{M}+\text{H}]^+$  calculated for  $\text{C}_{34}\text{H}_{33}\text{N}_6\text{O}_5$  605.2506 found 605.2509

**<sup>1</sup>H NMR** (500 MHz,  $\text{CDCl}_3$ ):  $\delta$  9.09 (t,  $J = 6.3$  Hz, 1H), 8.47 (d,  $J = 8.0$  Hz, 2H), 8.17 (s, 1H), 7.98 – 7.88 (m, 2H), 7.84 (s, 1H), 7.79 (d,  $J = 7.8$  Hz, 1H), 7.64 (d,  $J = 2.3$  Hz, 1H), 7.56 – 7.48 (m, 1H), 7.46 (t,  $J = 7.6$  Hz, 1H), 7.19 (d,  $J = 5.0$  Hz, 1H), 4.64 (t,  $J = 6.1$  Hz, 2H), 3.76 (s, 3H), 2.69 – 2.57 (m, 1H), 2.54 – 2.47 (m, 1H), 2.38 (s, 3H), 2.04 – 1.95 (m, 1H), 1.52 (s, 3H).

**<sup>13</sup>C NMR** (125 MHz,  $\text{CDCl}_3$ ) partial:  $\delta$  199.1, 173.4, 165.4, 164.3, 162.8, 160.8, 160.0, 157.6, 139.1, 135.7, 135.4, 134.5, 133.1, 131.1, 131.0, 129.1, 128.9, 126.2, 126.0, 123.5, 122.4, 118.4, 107.6, 52.8, 44.9, 43.2, 35.8, 32.0, 24.6, 18.3;

**Preparation of 3-methoxycarbonylbenzyl bromide (S28):**

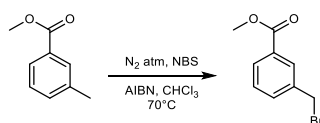

3-methoxycarbonylbenzyl bromide was prepared according to the literature procedures.<sup>16</sup>

**Preparation of 1-(3-methoxycarbonyl)benzyl 3-methyl (R)-3-methyl-6-oxocyclohex-1-ene-1,3-dicarboxylate (S29):**

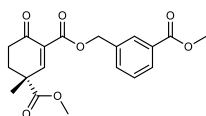

Compound **S5R** (0.100 g, 0.50 mmol, 1.3 eq.) was dissolved in anhydrous DMF (2 mL) under a nitrogen atmosphere and  $\text{K}_2\text{CO}_3$  (0.064 g, 0.47 mmol, 1.2 eq.) was added to the solution and the mixture was stirred for 45 minutes. Then **S28** (0.09 g, 0.39 mmol, 1 eq.) was added to the

reaction mixture and was stirred for 24 hours at 25°C. After that, the reaction mixture was diluted with ethyl acetate and was washed with brine four times. The combined organic phases were dried over Na<sub>2</sub>SO<sub>4</sub>, filtered, and evaporated under reduced pressure. The residue was purified by flash column chromatography on silica gel using hexane: ethyl acetate = 3:1 as eluent. Compound **S29** was obtained as a yellow oil (40.0 mg, 23%).

**HRMS** (ESI-TTOF) *m/z* [M+H]<sup>+</sup> calculated for C<sub>19</sub>H<sub>21</sub>O<sub>7</sub> 361.1287 found 361.1293

**<sup>1</sup>H NMR** (500 MHz, CDCl<sub>3</sub>): δ 8.08 (br, 1H), 8.01 (d, *J* = 7.8 Hz, 1H), 7.64 (d, *J* = 7.7 Hz, 1H), 7.54 (s, 1H), 7.46 (t, *J* = 7.7 Hz, 1H), 5.30 (s, 2H), 3.93 (s, 3H), 3.76 (s, 3H), 2.59 – 2.55 (m, 2H), 2.52 – 2.45 (m, 1H), 2.04 – 1.98 (m, 1H), 1.49 (s, 3H).

**<sup>13</sup>C NMR** (125 MHz, CDCl<sub>3</sub>): δ 193.2, 173.6, 166.8, 164.1, 156.3, 136.1, 132.8, 131.6, 130.6, 129.6, 129.4, 128.8, 66.5, 53.0, 52.3, 44.5, 35.4, 32.4, 24.6;

#### Preparation of (*R*)-3-(((3-methoxycarbonyl)-3-methyl-6-oxocyclohex-1-ene-1-carbonyloxy)methyl)benzoic acid (**S30**):

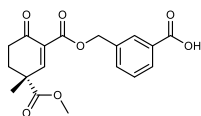

Compound **S29** (0.04 g, 0.10 mmol, 1 eq.) was dissolved in THF:MeOH:H<sub>2</sub>O (3:1:1) (0.6 : 0.2 : 0.2 mL) and LiOH·H<sub>2</sub>O (0.014 g, 0.33 mmol, 3.3 eq.) was added. Then the reaction mixture was stirred for 16 hours at 25°C. After that, the reaction mixture was diluted with distilled water and was washed with methylene chloride two times. The aqueous phase was acidified with a 10% citric acid solution and was washed with methylene chloride three times. The combined organic phases were dried over anhydrous Na<sub>2</sub>SO<sub>4</sub>, filtered, and evaporated under reduced pressure. Compound **S30** was obtained as a yellow oil (15.0 mg, 43%).

**HRMS** (ESI-TTOF) *m/z* [M+H]<sup>+</sup> calculated for C<sub>18</sub>H<sub>19</sub>O<sub>7</sub> 347.1130 found 347.1145

**<sup>1</sup>H NMR** (500 MHz, CDCl<sub>3</sub>): δ 8.15 (s, 1H), 8.08 (d, *J* = 7.8 Hz, 1H), 7.70 (d, *J* = 7.7 Hz, 1H), 7.56 (s, 1H), 7.50 (t, *J* = 7.7 Hz, 1H), 5.32 (s, 2H), 3.77 (s, 3H), 2.60-2.56 (m, 2H), 2.53 – 2.46 (m, 1H), 2.04 – 1.98 (m, 1H), 1.50 (s, 3H).

**<sup>13</sup>C NMR** (125 MHz, CDCl<sub>3</sub>): δ 193.3, 173.7, 170.9, 164.2, 156.5, 136.3, 133.6, 131.6, 130.2, 130.0, 129.8, 129.1, 66.5, 53.1, 44.6, 35.5, 32.1, 24.7;

#### Preparation of 3-methyl 1-(3-((3-methyl-4-((4-(pyridin-3-yl)pyrimidin-2-yl)amino)phenyl)carbonyl)benzyl) (*R*)-3-methyl-6-oxocyclohex-1-ene-1,3-dicarboxylate (**1a''R-IN-8**):

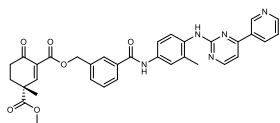

Compound **S30** (0.02 g, 0.06 mmol, 1 eq.) was dissolved in anhydrous DMF (1 mL) under a nitrogen atmosphere and HBTU (0.022 g, 0.06 mmol, 1 eq.) and *N*-methyl-morpholine (0.052 g, 1.74 mmol) were added to the solution. Then the reaction mixture was stirred for 10 minutes

and 2-methyl-*N*-(4-(pyridin-3-yl)pyrimidin-2-yl)benzene-1,4-diamine (0.016 g, 0.06 mmol, 1 eq.) was added. After that, the reaction mixture was stirred for 16 hours at 25°C. Then the reaction mixture was diluted with ethyl acetate and washed two times with a 5% citric acid solution, two times with a saturated aqueous Na<sub>2</sub>CO<sub>3</sub> solution, and two times with brine. The organic phase was dried over Na<sub>2</sub>SO<sub>4</sub>. Then it was filtered and evaporated under reduced pressure. The resulting crude product was purified by preparative RP-HPLC using a gradient method on a Gemini® 5µm C18 110 Å column (H<sub>2</sub>O:MeCN = 95:5 (0.1 % HCOOH) to 100% MeCN (0.1 % HCOOH)). Compound **1a''R-IN-8** was obtained as a yellow oil (3.0 mg, 8%).

**HRMS** (ESI-TTOF) *m/z* [M+H]<sup>+</sup> calculated for C<sub>34</sub>H<sub>32</sub>N<sub>5</sub>O<sub>6</sub> 606.2352 found 606.2369

**<sup>1</sup>H NMR** (500 MHz, CDCl<sub>3</sub>): δ 8.47 (s, 1H), 8.42 (d, *J* = 7.8 Hz, 1H), 8.38 (s, 1H), 8.14 (s, 1H), 7.94 (d, *J* = 7.5 Hz, 1H), 7.90 (d, *J* = 8.6 Hz, 1H), 7.74 (s, 1H), 7.64 (d, *J* = 8.9 Hz, 1H), 7.56 (s, 1H), 7.54 – 7.48 (m, 2H), 7.18 (d, *J* = 5.3 Hz, 1H), 5.39 (s, 2H), 3.77 (s, 3H), 2.69 – 2.56 (m, 2H), 2.54 – 2.49 (m, 1H), 2.38 (s, 3H), 2.10 – 1.94 (m, 1H), 1.52 (s, 3H).

**<sup>13</sup>C NMR** (125 MHz, CDCl<sub>3</sub>) partial: δ 194.1, 173.5, 172.8, 165.2, 164.6, 163.1, 160.4, 157.9, 156.5, 150.8, 147.9, 136.5, 135.4, 135.0, 133.3, 132.2, 131.2, 130.5, 129.2, 127.5, 125.7, 123.8, 122.4, 118.5, 107.7, 66.3, 53.1, 44.5, 35.5, 32.1, 24.7, 18.5;

#### Preparation of tert-butyl 2-methyl-3-oxopropanoate (**S31**):

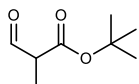

Compound **S31** was synthesized according to literature procedures.<sup>17</sup>

#### Preparation of prop-2-yn-1-yl 2-methyl-3-oxopropanoate (**S2d**):

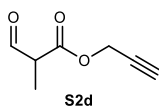

Compound **S31** (1.00 g, 6.321 mmol, 1 eq.) was dissolved in toluene (30 mL) then propargyl alcohol (0.547 mL, 9.482 mmol, 1.5 eq.) was added, and the mixture was heated to 110°C where it was kept for until full conversion was achieved (1 hour). The mixture was cooled to 25°C and then concentrated under reduced pressure at 30°C. Compound **S2d** was obtained by vacuum distillation as colorless oil (624.0 mg, 68%).

**<sup>1</sup>H NMR** (500 MHz, CDCl<sub>3</sub>) enol-form: δ 11.04 (d, *J* = 12.8 Hz, 1H), 7.03 (dq, *J* = 12.8, 1.2 Hz, 1H), 4.79 (d, *J* = 2.5 Hz, 2H), 2.50 (t, *J* = 2.5 Hz, 1H), 1.72 (d, *J* = 1.2 Hz, 3H).

**<sup>13</sup>C NMR** (125 MHz, CDCl<sub>3</sub>) enol form: δ 196.6, 171.5, 99.6, 75.6, 75.1, 51.8, 12.1;

#### Preparation of 1-(tert-butyl) 3-(prop-2-yn-1-yl) 3-methyl-6-oxocyclohex-1-ene-1,3-dicarboxylate (**S32R/S32S**):

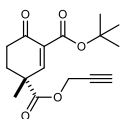

Following the **General Procedure A** using: **S1a** (300.0 mg, 1.76 mmol), **S2d** (271.7 mg, 1.94 mmol) and catalyst **S3a/S3b** (24.14 mg, 0.0353 mmol) in 1,4-dioxane (1.8 mL, 1.0 M) at 25°C for 3 days. After removal of the volatile compounds under reduced pressure, purification



by flash chromatography on silica gel (hexanes 0-25% ethyl acetate) gave the product as a colorless oil (442.7 mg, 86% for **S32R** 433.0 mg, 84% for **S32S**).

*ee*: 92% with catalyst **S3a** (**S32R**)

*ee*: -87% with catalyst **S3b** (**S32S**)

**HRMS** (ESI-TTOF) *m/z* [M+H]<sup>+</sup> calculated for C<sub>16</sub>H<sub>21</sub>O<sub>5</sub> 293.1388 found 293.1393

**<sup>1</sup>H NMR** (300 MHz, CDCl<sub>3</sub>): δ 7.35 (s, 1H), 4.74 (dd, *J* = 5.6, 2.5 Hz, 2H), 2.58 – 2.53 (m, 2H), 2.50 (s, 1H), 2.48 – 2.43 (m, 1H) 2.04 – 1.96 (m, 1H), 1.52 (s, 9H), 1.50 (s, 3H).

**<sup>13</sup>C NMR** (75 MHz, CDCl<sub>3</sub>): δ 199.5, 172.7, 163.7, 153.3, 133.7, 82.4, 75.6, 53.2, 44.2, 35.3, 32.0, 28.5, 28.2, 24.5;

**Preparation of 3-methyl-6-oxo-3-((prop-2-yn-1-yloxy)carbonyl)cyclohex-1-ene-1-carboxylic acid (**S33R/S33S**):**

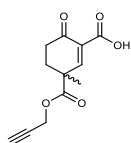

Trifluoroacetic acid (159 μL, 2.06 mmol, 3 eq.) was added to a solution of compound **S32R/S32S** (201 mg, 0.69 mmol, 1 eq.) in methylene chloride (5 mL) and then the mixture was stirred at 25°C. The reaction was monitored by TLC and when it was completed (3 h) the reaction mixture was evaporated. The remaining trifluoroacetic acid was removed by redissolving the mixture in toluene and evaporating to dryness at 50°C under reduced pressure which was repeated three times. Compound **S33R/S33S** was obtained as a yellow oil in quantitative yield (162 mg) and was used in the next step without further purification.

**HRMS** (ESI-TTOF) *m/z* [M+H]<sup>+</sup> calculated for C<sub>12</sub>H<sub>13</sub>O<sub>5</sub> 237.0757 found 237.0750

**<sup>1</sup>H NMR** (500 MHz, CDCl<sub>3</sub>): δ 8.31 (s, 1H), 4.80 – 4.77 (m, 2H), 2.83 – 2.66 (m, 2H), 2.59 (dddd, *J* = 13.1, 6.6, 5.4, 1.2 Hz, 1H), 2.54 (t, *J* = 2.5 Hz, 1H), 2.10 (ddd, *J* = 14.5, 9.9, 5.2 Hz, 1H), 1.60 (s, 3H).

**<sup>13</sup>C NMR** (125 MHz, CDCl<sub>3</sub>): δ 201.9, 171.5, 164.5, 163.3, 151.2, 76.7, 76.1, 53.5, 45.3, 34.5, 31.7, 24.3;

**Preparation of prop-2-yn-1-yl 1-methyl-3-((3-((3-methyl-4-((4-(pyridin-3-yl)pyrimidin-2-yl)amino)phenyl)carbonyl)phenyl)carbonyl)-4-oxocyclohex-2-ene-1-carboxylate (**1bR-IN-8** and **1bS-IN-8**):**

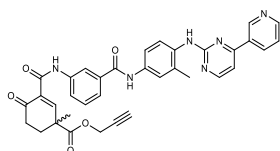

Compound **S33R/S33S** (39.3 mg, 0.166 mmol, 2 eq.) was dissolved in anhydrous dimethylformamide (0.400 mL) in a flame-dried vial under a nitrogen atmosphere, HBTU (63.1 mg, 0.166 mmol, 2 eq.) and *N*-methylnmorpholine (37 μL, 0.333 mmol, 4 eq.) were added and the mixture was stirred at 25°C. After 30 minutes a DMF solution (0.400 mL) of compound **S22** (33.0 mg, 0.083 mmol, 1 eq.) was added and the reaction mixture was stirred at 25°C for 3 days. The reaction was monitored by HPLC-MS and when the starting material was consumed

the reaction mixture was diluted with ethyl acetate, washed two times with a 5% citric acid solution, two times with a saturated aqueous Na<sub>2</sub>CO<sub>3</sub> solution and two times with brine. The organic phase was dried over anhydrous Na<sub>2</sub>SO<sub>4</sub>, filtered, then evaporated under reduced pressure. The resulting crude product was purified by preparative RP-HPLC using a gradient method on a Gemini<sup>®</sup> 5μm C18 110 Å column (H<sub>2</sub>O:MeCN = 95:5 (0.1 % HCOOH) to 100% MeCN (0.1 % HCOOH)). The target compound was obtained as a yellow solid (23.0 mg, 45% for **1bR-IN-8**, 18.9 mg, 37% **1bS-IN-8**).

**HRMS** (ESI-TTOF) *m/z* [M+H]<sup>+</sup> calculated for C<sub>35</sub>H<sub>31</sub>N<sub>6</sub>O<sub>5</sub> 615.2355 found 615.2382

**<sup>1</sup>H NMR** (500 MHz, CDCl<sub>3</sub>): δ 10.84 (s, 1H), 9.24 (s, 1H), 8.72 (s, 1H), 8.47 (d, *J* = 5.1 Hz, 1H), 8.35 (d, *J* = 7.9 Hz, 1H), 8.25 (s, 1H), 8.20 (s, 1H), 8.10 (s, 1H), 7.98 (d, *J* = 8.6 Hz, 1H), 7.80 (d, *J* = 8.1 Hz, 1H), 7.67 (d, *J* = 7.9 Hz, 1H), 7.62 (d, *J* = 2.3 Hz, 1H), 7.52 (d, *J* = 8.4 Hz, 1H), 7.43 (t, *J* = 7.9 Hz, 1H), 7.14 (d, *J* = 5.0 Hz, 1H), 7.04 (s, 1H), 4.75 (t, *J* = 2.8 Hz, 2H), 2.75 – 2.62 (m, 2H), 2.61 – 2.52 (m, 1H), 2.35 (s, 3H), 2.06 (td, *J* = 8.9, 4.3 Hz, 1H), 1.57 (s, 3H).

**<sup>13</sup>C NMR** (125 MHz, CDCl<sub>3</sub>) partial: δ 199.5, 172.2, 165.3, 162.7, 161.3, 161.2, 160.7, 159.2, 151.5, 148.5, 138.3, 136.1, 134.7, 134.1, 134.0, 130.4, 129.6, 129.3, 123.7, 123.6, 123.1, 122.7, 118.8, 118.7, 108.1, 75.9, 53.6, 53.4, 45.2, 35.9, 32.0, 24.5, 18.4;

**Preparation of 3-((1-(2-amino-2-oxoethyl)-1*H*-1,2,3-triazol-4-yl)methyl) 1-(*tert*-butyl) 3-methyl-6-oxocyclohex-1-ene-1,3-dicarboxylate (S34R/S34S):**

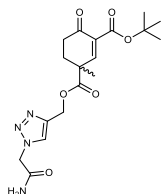

To a solution of compound **S32R** /**S32S** (80.0 mg, 0.274mmol, 1 eq.) and 2-azidoacetamide (41.1 mg, 0.410 mmol, 1.5 eq.) in methylene chloride (0.5 mL) was added a solution of sodium-ascorbate (27.1 mg, 0.137 mmol, 0.5 eq.) and copper(II) sulfate pentahydrate (6.80 mg, 0.027 mmol, 0.1 eq.) in water (0.5 mL) and methanol (0.25 mL). The reaction mixture was stirred vigorously at 25°C for 1 hour. When the starting material was consumed, the reaction mixture was diluted with 5 mL methylene chloride and washed with water two times. The organic phase was dried over anhydrous Na<sub>2</sub>SO<sub>4</sub>, filtered, then evaporated under reduced pressure. The residue was purified by flash column chromatography on silica gel using methylene chloride: methanol = 9:1 as eluent. The target compound was isolated as a yellow solid (50.0 mg, 47% for **S34R**, 53.1 mg, 50% for **S34S**).

**HRMS** (ESI-TTOF) *m/z* [M+H]<sup>+</sup> calculated for C<sub>18</sub>H<sub>25</sub>N<sub>4</sub>O<sub>6</sub> 393.1774 found 393.1779

**<sup>1</sup>H NMR** (500 MHz, CDCl<sub>3</sub>): δ 7.78 (s, 1H), 7.30 (s, 1H), 5.32 (s, 2H), 5.08 (s, 2H), 2.52 – 2.47 (m, 2H), 2.46 – 2.40 (m, 1H), 2.02 – 1.93 (m, 1H), 1.51 (s, 9H), 1.47 (s, 3H).

**<sup>13</sup>C NMR** (125 MHz, CDCl<sub>3</sub>): δ 193.9, 173.2, 167.6, 163.7, 153.9, 133.3, 125.8, 82.5, 58.6, 53.5, 52.2, 44.2, 35.2, 32.0, 28.1, 24.4;

**Preparation of 3-(((1-(2-amino-2-oxoethyl)-1H-1,2,3-triazol-4-yl)methoxy)carbonyl)-3-methyl-6-oxocyclohex-1-ene-1-carboxylic acid (S35R/S35S):**

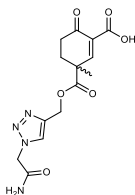

To a solution of compound **S34R/S34S** (53.1 mg, 0.135 mmol, 1 eq.) in methylene chloride (0.65 mL) was added TFA (31  $\mu$ L, 0.406 mmol, 3 eq.) and the reaction mixture was stirred at 25°C for 3 hours. The reaction was monitored by TLC and when it was completed the reaction mixture was evaporated. The remaining trifluoroacetic acid was removed by redissolving the mixture in toluene and evaporating at 50°C for three times. Compound **S35R/S35S** was obtained as a yellow oil in quantitative yield (45.5 mg) and was used in the next step without further purification.

**HRMS** (ESI-TTOF)  $m/z$   $[M+H]^+$  calculated for  $C_{14}H_{17}N_4O_6$  337.1148 found 337.1154

**$^1H$  NMR** (500 MHz,  $CDCl_3$ ):  $\delta$  8.02 (s, 1H), 7.82 (s, 1H), 5.22 (s, 2H), 5.03 (s, 2H), 2.58 (dt,  $J = 12.0, 5.8$  Hz, 2H), 2.47 – 2.36 (m, 1H), 1.97 (ddd,  $J = 14.3, 9.1, 5.5$  Hz, 1H), 1.44 (s, 3H).

**$^{13}C$  NMR** (125 MHz,  $CDCl_3$ ):  $\delta$  200.7, 172.2, 167.9, 164.2, 163.4, 142.1, 126.8, 125.9, 58.7, 51.9, 45.1, 34.4, 31.5, 23.9;

**Preparation of (1-(2-amino-2-oxoethyl)-1H-1,2,3-triazol-4-yl)methyl 1-methyl-3-((3-methyl-4-((4-(pyridin-3-yl)pyrimidin-2-yl)amino)phenyl)carbonyl)phenyl)carbonyl)-4-oxocyclohex-2-ene-1-carboxylate (1cR-IN-8 and 1cS-IN-8):**

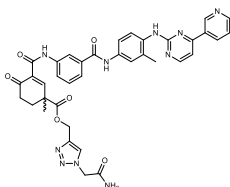

Compound **S35R/S35S** (45.2 mg, 0.134 mmol, 1.5 eq.) was dissolved in anhydrous dimethylformamide (0.550 mL) in a flame-dried vial under a nitrogen atmosphere, HBTU (50.9 mg, 0.134 mmol, 1.5 eq.) and *N*-methylmorpholine (39  $\mu$ L, 0.358 mmol, 4 eq.) were added and the mixture was stirred at 25°C. After 30 minutes a DMF solution (0.550 mL) of compound **S22** (35.5 mg, 0.089 mmol, 1 eq.) was added and the reaction mixture was stirred at 25°C for 3 days. The reaction was monitored by HPLC-MS and when the starting material was consumed the reaction mixture was diluted with ethyl acetate, washed two times with a 5% citric acid solution, two times with a saturated aqueous  $Na_2CO_3$  solution and two times with brine. The organic phase was dried over anhydrous  $Na_2SO_4$ , filtered, then evaporated under reduced pressure. The resulting crude product was purified by preparative RP-HPLC using a gradient method on a Gemini<sup>®</sup> 5 $\mu$ m C18 110 Å column ( $H_2O:MeCN = 95:5$  (0.1 % HCOOH) to 100% MeCN (0.1 % HCOOH)). The target compound was obtained as a yellow solid (19.3 mg, 30% for **1cR-IN-8**, 16.6 mg, 26% for **1cS-IN-8**).

**HRMS** (ESI-TTOF)  $m/z$   $[M+H]^+$  calculated for  $C_{37}H_{35}N_{10}O_6$  715.2741 found 715.2763

**<sup>1</sup>H NMR** (500 MHz, CDCl<sub>3</sub>): δ 10.78 (s, 1H), 9.13 (s, 1H), 8.61 (s, 1H), 8.39 (d, *J* = 5.2 Hz, 1H), 8.31 (d, *J* = 8.0 Hz, 1H), 8.13 (s, 1H), 8.11 (d, *J* = 2.8 Hz, 1H), 7.84 – 7.78 (m, 2H), 7.65 (d, *J* = 7.7 Hz, 1H), 7.59 (s, 1H), 7.51 (t, *J* = 8.6 Hz, 2H), 7.39 (t, *J* = 7.9 Hz, 1H), 7.09 (d, *J* = 5.2 Hz, 1H), 5.25 (s, 2H), 5.00 (s, 2H), 2.59 (ddd, *J* = 14.8, 11.4, 6.7 Hz, 2H), 2.45 (dt, *J* = 12.9, 6.1 Hz, 1H), 2.29 (s, 3H), 1.98 (ddd, *J* = 14.3, 9.4, 6.1 Hz, 1H), 1.48 (s, 3H).

**<sup>13</sup>C NMR** (125 MHz, CDCl<sub>3</sub>): δ 199.3, 172.7, 167.6, 166.2, 162.5, 161.5, 161.0, 160.9, 159.0, 150.8, 148.0, 142.3, 137.3, 136.1, 135.2, 134.7, 133.6, 132.0, 129.4, 129.1, 125.8, 125.0, 124.4, 123.9, 123.5, 122.9, 121.5, 119.4, 118.9, 107.8, 58.7, 45.1, 35.6, 31.8, 24.2, 18.2, 18.0;

**Preparation of 1-(*tert*-butyl) 3-(3-phenylprop-2-yn-1-yl) (*R*)-3-methyl-6-oxocyclohex-1-ene-1,3-dicarboxylate (**S36R**):**

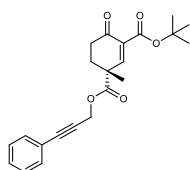

Into a flame-dried vial under a nitrogen atmosphere was added Pd(PPh<sub>3</sub>)<sub>2</sub>Cl<sub>2</sub> (7.2 mg, 0.010 mmol, 0.06 eq.) and CuI (3.6 mg, 0.019 mmol, 0.11 eq.). To this vial was added a solution of compound **S32R** (50.0 mg, 0.171 mmol, 1 eq.) and iodobenzene (34.9 mg, 0.171 mmol, 1 eq.) in anhydrous tetrahydrofuran (0.375 mL) and diisopropylamine (0.375 mL). The reaction mixture was stirred at 25°C for 4 hours and when the starting material was consumed it was filtered through a pad of Celite then evaporated. The residue was purified by flash column chromatography on silica gel using hexane: ethyl acetate = 1:1 as eluent to afford compound **S36R** as a yellow oil (31.7 mg, 50%).

**HRMS** (ESI-TTOF) *m/z* [M+H]<sup>+</sup> calculated for C<sub>22</sub>H<sub>24</sub>O<sub>5</sub>Na 391.1515 found 391.1514

**<sup>1</sup>H NMR** (500 MHz, CDCl<sub>3</sub>): δ 7.45 (d, *J* = 1.6 Hz, 1H), 7.43 (d, *J* = 1.9 Hz, 1H), 7.39 (s, 1H), 7.35 – 7.33 (m, 2H), 7.32 – 7.29 (m, 1H), 5.02 (d, *J* = 15.5 Hz, 1H), 4.97 (d, *J* = 15.5 Hz, 1H), 2.65 – 2.55 (m, 1H), 2.55 – 2.47 (m, 2H), 2.09 – 1.98 (m, 1H), 1.53 (s, 3H), 1.52 (s, 9H).

**<sup>13</sup>C NMR** (125 MHz, CDCl<sub>3</sub>): δ 193.5, 172.8, 163.7, 153.5, 133.7, 132.0, 129.1, 128.5, 122.0, 87.2, 82.3, 82.3, 54.1, 44.3, 35.4, 32.1, 28.2, 24.5;

**Preparation of (*R*)-3-methyl-6-oxo-3-(((3-phenylprop-2-yn-1-yl)oxy)carbonyl)cyclohex-1-ene-1-carboxylic acid (**S37R**):**

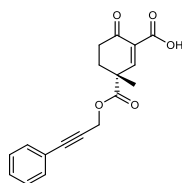

To a solution of compound **S36R** (31.7 mg, 0.086 mmol, 1 eq.) in methylene chloride (0.80 mL) was added TFA (40 μL, 0.516 mmol, 6 eq.) and the reaction mixture was stirred at 25°C for 3 hours. The reaction was monitored by TLC and when it was completed the reaction mixture was evaporated. The remaining trifluoroacetic acid was removed by redissolving the mixture in toluene and evaporating to dryness under reduced pressure at 50°C which was repeated three times. Compound **S37R** was obtained as a brown oil (25.3 mg, 94%).

**HRMS** (ESI-TTOF)  $m/z$   $[M-H]^+$  calculated for  $C_{18}H_{15}O_5$  311.0919 found 311.0899

**$^1H$  NMR** (500 MHz,  $CDCl_3$ ):  $\delta$  8.31 (s, 1H), 7.48 – 7.39 (m, 2H), 7.37 – 7.29 (m, 2H), 7.35 – 7.28 (m, 1H), 4.98 (d,  $J = 2.7$  Hz, 2H), 2.82 – 2.66 (m, 2H), 2.68 – 2.51 (m, 1H), 2.08 (m, 1H), 1.59 (d,  $J = 0.8$  Hz, 3H).

**$^{13}C$  NMR** (125 MHz,  $CDCl_3$ ):  $\delta$  202.0, 171.6, 164.8, 163.4, 132.0, 129.2, 128.5, 126.2, 121.8, 87.6, 81.9, 54.5, 45.4, 34.6, 31.8, 24.4;

**Preparation of 3-phenylprop-2-yn-1-yl (*R*)-1-methyl-3-((3-((3-methyl-4-((4-(pyridin-3-yl)pyrimidin-2-yl)amino)phenyl)carbamoyl)phenyl)carbamoyl)-4-oxocyclohex-2-ene-1-carboxylate (**1dR-IN-8**):**

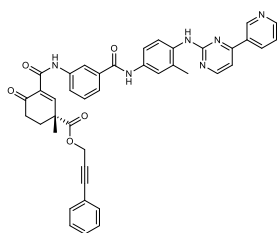

Compound **S37R** (25.3 mg, 0.081 mmol, 1.25 eq.) was dissolved in anhydrous dimethylformamide (0.350 mL) in a flame-dried vial under a nitrogen atmosphere, HBTU (30.7 mg, 0.081 mmol, 1.25 eq.) and *N*-methylmorpholine (18  $\mu$ L, 0.162 mmol, 2.5 eq.) were added and the mixture was stirred at 25°C. After 30 minutes a DMF solution (0.350 mL) of compound **S22**(25.7 mg, 0.065 mmol, 1 eq.) was added and the reaction mixture was stirred at 25°C for 3 days. The reaction was monitored by HPLC-MS and when the starting material was consumed the reaction mixture was diluted with ethyl acetate, washed two times with a 5% citric acid solution, two times with a saturated aqueous  $Na_2CO_3$  solution and two times with brine. The organic phase was dried over anhydrous  $Na_2SO_4$ , filtered, then evaporated under reduced pressure. The resulting crude product was purified by preparative RP-HPLC using a gradient method on a Gemini<sup>®</sup> 5 $\mu$ m C18 110 Å column ( $H_2O:MeCN = 95:5$  (0.1 % HCOOH) to 100% MeCN (0.1 % HCOOH)). Compound **1dR-IN-8** was obtained as a yellow solid (10.9 mg, 24%).

**HRMS** (ESI-TTOF)  $m/z$   $[M+H]^+$  calculated for  $C_{41}H_{35}N_6O_5$  691.2668 found 691.2684

**$^1H$  NMR** (500 MHz,  $CDCl_3$ ):  $\delta$  9.22 (s, 1H), 8.63 (s, 1H), 8.46 (d,  $J = 8.0$  Hz, 1H), 8.42 (d,  $J = 5.2$  Hz, 1H), 8.16 (s, 1H), 8.15-8.13 (m, 1H), 7.85 – 7.7 (m, 1H), 7.70 (dd,  $J = 7.7, 1.5$  Hz, 1H), 7.64 – 7.62 (m, 2H), 7.57 (dd,  $J = 8.5, 2.4$  Hz, 1H), 7.57 – 7.49 (m, 2H), 7.55 – 7.50 (m, 1H), 7.48 (t,  $J = 7.9$  Hz, 1H), 7.42 – 7.41 (m, 1H), 7.40-7.39 (m, 1H), 7.34 – 7.30 (m, 4H), 7.28 (d,  $J = 5.3$  Hz, 1H), 5.03 (s, 2H), 2.57 – 2.44 (m, 2H), 2.17 – 2.09 (m, 1H), 2.06 – 2.01 (m, 1H), 1.59 (s, 3H).

**$^{13}C$  NMR** (125 MHz,  $CDCl_3$ ):  $\delta$  200.1, 173.7, 168.0, 163.5, 162.7, 162.6, 161.4, 160.1, 153.5, 151.6, 148.9, 139.1, 137.2, 136.5, 136.4, 135.2, 133.9, 132.69, 132.66, 130.9, 130.2, 129.9, 129.8, 129.4, 126.1, 124.8, 124.1, 123.1, 120.7, 120.1, 108.4, 87.7, 83.4, 54.8, 46.1, 36.3, 32.8, 24.4, 18.5;

**Preparation of 3-((3-((4-(pyridin-3-yl)pyrimidin-2-yl)amino)bicyclo[1.1.1]pentan-1-yl)carbonyl)benzenaminium chloride (S45):**

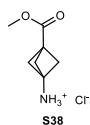

Compound **S38** was synthesized according to the literature procedures from bicyclo[1.1.1]pentane-1,3-dicarboxylic acid.<sup>18</sup>

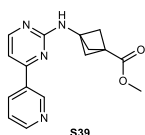

2-chloro-4-(pyridin-3-yl)pyrimidine (541.0 mg, 2.823 mmol, 1 eq.) was dissolved in anhydrous 1,4-dioxane (18 mL) and PdOAc<sub>2</sub> (58.87 mg, 0.282 mmol, 0.1 eq.), BINAP (351.6 mg, 0.565 mmol, 0.2 eq.), Cs<sub>2</sub>CO<sub>3</sub> (2.073 g, 8.469 mmol, 3 eq.) and compound **S38** (0.752 g, 4.235 mmol, 1.5 eq.) were added to the solution. After that the reaction mixture was refluxed for 1.5 hours. The reaction mixture was cooled down to 25°C and filtered through Celite and the filtrate was evaporated under reduced pressure. The residue was purified by flash column chromatography on silica gel using hexanes:ethyl acetate as eluent. Compound **S39** was obtained as an off-white solid (0.460 g, 55%).

**HRMS** (ESI-TTOF) *m/z* [M+H]<sup>+</sup> calculated for C<sub>16</sub>H<sub>17</sub>N<sub>4</sub>O<sub>2</sub> 297.1351 found 297.1356

**<sup>1</sup>H NMR** (500 MHz, CDCl<sub>3</sub>): δ 9.24 (d, *J* = 2.5 Hz, 1H), 8.71 (dd, *J* = 4.8, 1.7 Hz, 1H), 8.38 (d, *J* = 5.2 Hz, 1H), 8.31 (dt, *J* = 8.0, 2.0 Hz, 1H), 7.42 (ddd, *J* = 7.9, 4.8, 0.9 Hz, 1H), 7.07 (d, *J* = 5.2 Hz, 1H), 5.68 (s, 1H), 3.72 (s, 3H), 2.50 (s, 6H).

**<sup>13</sup>C NMR** (125 MHz, CDCl<sub>3</sub>): δ 170.5, 162.5, 162.5, 159.0, 151.5, 148.7, 134.5, 133.1, 123.7, 107.4, 54.4, 51.9, 47.0, 36.3;

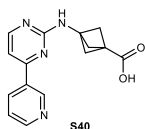

Compound **S39** (273.0 mg, 0.921 mmol, 1 eq.) was dissolved in a mixture of THF and H<sub>2</sub>O (7:3, 1.70:0.730 mL), and LiOH·H<sub>2</sub>O (57.98 mg, 1.382 mmol, 1.5 eq.) was added to the solution. The mixture was stirred for 1.5 h at 25°C and then diluted with water (10 mL) and washed with methylene chloride (5mL) two times. The aqueous phase was acidified to pH=7 with a 10% HCl solution and the resulting white precipitate was filtered and dried under reduced pressure affording compound **S40** (0.208 g, 80%).

**HRMS** (ESI-TTOF) *m/z* [M+H]<sup>+</sup> calculated for C<sub>15</sub>H<sub>15</sub>N<sub>4</sub>O<sub>2</sub> 283.1195 found 283.1199

**<sup>1</sup>H NMR** (500 MHz, DMSO-*d*<sub>6</sub>): δ 12.37 (s, 1H), 9.28 (d, *J* = 2.2 Hz, 1H), 8.70 (dd, *J* = 4.8, 1.6 Hz, 1H), 8.46 – 8.37 (m, 2H), 8.05 (s, 1H), 7.57 (dd, *J* = 8.0, 4.8 Hz, 1H), 7.32 (d, *J* = 5.2 Hz, 1H), 2.33 (s, 6H).

**<sup>13</sup>C NMR** (125 MHz, DMSO-*d*<sub>6</sub>): δ 171.0, 162.3, 161.2, 159.3, 151.2, 147.9, 134.2, 132.5, 123.9, 106.6, 53.4, 46.3, 36.2;

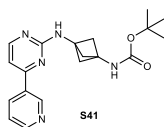

To compound **S40** (150.0 mg, 0.531 mmol, 1 eq), in anhydrous toluene (2.5 mL), was added TEA (222  $\mu$ L, 1.594 mmol, 3.0eq) and *tert*-butanol (176  $\mu$ L, 1.860 mmol, 3.5 eq.) to this mixture was added DPPA (219.3 mg, 0.797 mmol, 1.5 eq.). The reaction mixture was stirred at 100°C for 16 hours. After the reaction was completed, the mixture was cooled to 25°C, and it was concentrated under reduced pressure to remove the solvent. Water was added to the system, the brownish-white precipitate was filtered, washed with water, and dried under reduced pressure to afford the Boc-protected amine compound **S41** as a yellow powder (39.3 mg, 21%).

**HRMS** (ESI-TTOF)  $m/z$   $[M+H]^+$  calculated for  $C_{19}H_{24}N_5O_2$  354.1930 found 354.1935

**$^1H$  NMR** (500 MHz,  $CDCl_3$ ):  $\delta$  9.11 (s, 1H), 8.56 (d,  $J = 4.6$  Hz, 1H), 8.29 – 8.19 (m, 2H), 7.38 (dd,  $J = 8.0, 4.9$  Hz, 1H), 6.98 (d,  $J = 5.2$  Hz, 1H), 3.64 (s, 6H), 2.40 (s, 9H).

**$^{13}C$  NMR** (125 MHz,  $CDCl_3$ ) partial:  $\delta$  162.2, 162.1, 158.6, 156.3, 153.2, 150.6, 147.9, 135.0, 133.3, 124.0, 106.9, 54.5, 45.5, 45.2.

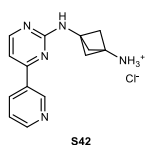

Compound **S41** (50.0 mg, 141.5  $\mu$ mol, 1 eq.) was added 8M solution of HCl in 1,4-dioxane (885  $\mu$ L, 7.073 mmol, 50 eq.) and the mixture was stirred at 25°C for 1 h. After the starting material was consumed the reaction mixture was evaporated under reduced pressure, suspended in diethyl ether, filtered, and washed two times with diethyl ether affording compound **S42** as a yellow solid (38.4 mg, 94%).

**HRMS** (ESI-TTOF)  $m/z$   $[M+H]^+$  calculated for  $C_{14}H_{17}N_5$  254.1405 found 254.1413

**$^1H$  NMR** (500 MHz,  $DMSO-d_6+CDCl_3$ ):  $\delta$  9.47 (d,  $J = 2.0$  Hz, 1H), 9.10 – 9.02 (m, 2H), 9.00 (d,  $J = 5.5$  Hz, 1H), 8.52 (dd,  $J = 5.3, 1.7$  Hz, 1H), 8.11 (t,  $J = 3.6, 3.0$  Hz, 1H), 7.48 (d,  $J = 5.3$  Hz, 1H), 2.39 (s, 3H), 2.36 (s, 3H).

**$^{13}C$  NMR** (125 MHz,  $DMSO-d_6+CDCl_3$ ):  $\delta$  154.8, 141.7, 135.3, 129.2, 126.8, 120.09, 120.05, 107.1, 106.7, 66.3, 54.1, 53.3, 44.8, 42.9;

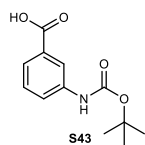

Compound **S43** was synthesized according to the literature procedure.<sup>19</sup>

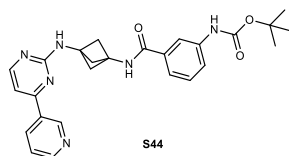

Compound **S43** (47.3 mg, 0.199 mmol, 1.5 eq.) was dissolved in anhydrous dimethylformamide (0.500 mL) in a flame-dried vial under a nitrogen atmosphere, HBTU (75.6 mg, 0.199 mmol, 1.5 eq.) and *N*-methylmorpholine (51  $\mu$ L, 0.465 mmol, 3.5 eq.) were added and the mixture was stirred at 25°C. After 30 minutes compound **S42** (38.4 mg, 0.133 mmol, 1 eq.) was added and the reaction mixture was stirred at 25°C for 16 hours. The reaction was monitored by HPLC-MS and when the starting material was consumed the reaction mixture was diluted with ethyl acetate, washed two times with a 5% citric acid solution, two times with a saturated aqueous Na<sub>2</sub>CO<sub>3</sub> solution, and two times with brine. The organic phase was dried over anhydrous Na<sub>2</sub>SO<sub>4</sub>, filtered, then evaporated under reduced pressure. The resulting crude product was purified by flash column chromatography on silica gel using hexanes:ethyl acetate as eluent, affording compound **S44** as an off-white solid (24.9 mg, 40%).

**HRMS** (ESI-TTOF)  $m/z$  [M+H]<sup>+</sup> calculated for C<sub>26</sub>H<sub>29</sub>N<sub>6</sub>O<sub>3</sub> 473.2301 found 473.2318

**<sup>1</sup>H NMR** (500 MHz, CDCl<sub>3</sub>):  $\delta$  9.08 (s, 1H), 8.53 (d,  $J$  = 3.8 Hz, 1H), 8.31 (d,  $J$  = 8.3 Hz, 1H), 8.24 (d,  $J$  = 5.2 Hz, 1H), 7.63 (s, 1H), 7.40 – 7.35 (m, 3H), 7.22 (t,  $J$  = 7.9 Hz, 1H), 6.97 (d,  $J$  = 5.1 Hz, 1H), 2.49 (s, 6H), 1.41 (s, 9H).

**<sup>13</sup>C NMR** (125 MHz, CDCl<sub>3</sub>) partial:  $\delta$  168.6, 162.2, 162.1, 158.6, 153.7, 150.6, 147.8, 138.8, 135.1, 134.9, 133.4, 129.1, 124.0, 121.8, 117.0, 106.8, 80.6, 54.7, 46.0, 45.5, 28.2;

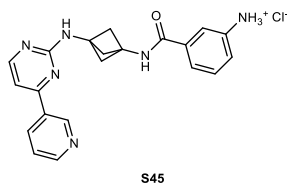

To compound **S44** (24.9 mg, 0.053 mmol, 1 eq.) was added an 8M solution of HCl in 1,4-dioxane (329  $\mu$ L, 2.635 mmol, 50 eq.) and the mixture was stirred at 25°C for 1 h. After the starting material was consumed the reaction mixture was evaporated under reduced pressure, suspended in diethyl ether, filtered, and washed two times with diethyl ether affording compound **S45** as a yellow solid (16.9 mg, 78%).

**HRMS** (ESI-TTOF)  $m/z$  [M+H]<sup>+</sup> calculated for C<sub>21</sub>H<sub>22</sub>N<sub>6</sub>O 373.1776 found 373.1787

**<sup>1</sup>H NMR** (500 MHz, CDCl<sub>3</sub>+DMSO-d<sub>6</sub>):  $\delta$  9.07 (d,  $J$  = 2.0 Hz, 1H), 8.50-8.47 (m, 3H), 8.11 (d,  $J$  = 5.6 Hz, 1H), 7.53 (bs, 1H), 7.50 (d,  $J$  = 8.0 Hz, 1H), 7.20 (d,  $J$  = 7.0 Hz, 1H), 7.05 (t,  $J$  = 7.9 Hz, 1H), 7.0 (br, 1H), 2.18 (s, 6H).

**<sup>13</sup>C NMR** (125 MHz, CDCl<sub>3</sub>+DMSO-d<sub>6</sub>) partial:  $\delta$  164.4, 141.0, 134.7, 130.4, 128.0, 125.8, 125.7, 124.8, 121.5, 105.6, 65.3, 53.5, 44.4, 44.2;

**Preparation of methyl (*R*)-1-methyl-4-oxo-3-((3-((3-((4-(pyridin-3-yl)pyrimidin-2-yl)amino)bicyclo[1.1.1]pentan-1-yl)carbamoyl)phenyl)carbamoyl)cyclohex-2-ene-1-carboxylate (1a*R*-isoPHEN):**

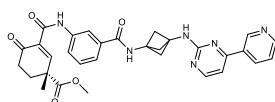

Compound **S5R** (13.2 mg, 0.062 mmol, 1.5 eq.) was dissolved in anhydrous dimethylformamide (0.100 mL) in a flame-dried vial under a nitrogen atmosphere, HBTU (23.5



mg, 0.062 mmol, 1.5 eq.) and *N*-methylmorpholine (18  $\mu$ L, 0.165 mmol, 4 eq.) were added and the mixture was stirred at 25°C. After 30 minutes an anhydrous DMF solution (0.150 mL) of compound **S45** (16.9 mg, 0.041 mmol, 1 eq.) was added and the reaction mixture was stirred at 25°C for 3 days. The reaction was monitored by HPLC-MS and when the starting material was consumed the reaction mixture was diluted with ethyl acetate, washed two times with a 5% citric acid solution, two times with a saturated aqueous Na<sub>2</sub>CO<sub>3</sub> solution, and two times with brine. The organic phase was dried over anhydrous Na<sub>2</sub>SO<sub>4</sub>, filtered, then evaporated under reduced pressure. The resulting crude product was purified by preparative RP-HPLC using a gradient method on a Gemini<sup>®</sup> 5 $\mu$ m C18 110 Å column (H<sub>2</sub>O:MeCN = 95:5 (0.1 % HCOOH) to 100% MeCN (0.1 % HCOOH)). Compound **1aR-isoPHEN** was obtained as a yellow oil (12.9 mg, 55%).

**HRMS** (ESI-TTOF) *m/z* [M+H]<sup>+</sup> calculated for C<sub>31</sub>H<sub>31</sub>N<sub>6</sub>O<sub>5</sub> 567.2355 found 567.2351

**<sup>1</sup>H NMR** (500 MHz, CDCl<sub>3</sub>+CD<sub>3</sub>OD):  $\delta$  9.14 (br, 1H), 8.60 (br, 1H), 8.36 (d, *J* = 8.2 Hz, 1H), 8.30 (d, *J* = 5.2 Hz, 1H), 8.19 (s, 1H), 8.04 (t, *J* = 1.9 Hz, 1H), 7.59 (dt, *J* = 7.7, 1.4 Hz, 1H), 7.53 (ddd, *J* = 8.1, 2.1, 1.1 Hz, 1H), 7.44 – 7.41 (m, 1H), 7.37 (t, *J* = 7.9 Hz, 1H), 7.02 (d, *J* = 5.1 Hz, 1H), 3.73 (s, 3H), 2.65 – 2.61 (m, 2H), 2.56 (s, 6H), 2.50 – 2.45 (m, 1H), 2.27 – 2.21 (m, 1H), 1.51 (s, 3H).

**<sup>13</sup>C NMR** (125 MHz, CDCl<sub>3</sub>+CD<sub>3</sub>OD) partial:  $\delta$  199.4, 174.2, 173.4, 168.2, 162.3, 162.2, 161.9, 160.9, 158.7, 150.6, 147.9, 137.3, 135.3, 135.1, 129.3, 128.8, 124.1, 123.6, 119.0, 106.8, 54.7, 52.9, 46.0, 45.1, 42.6, 35.7, 31.8, 24.4;

**Preparation of methyl (*R*)-1-methyl-4-oxo-3-((3-((4-((4-(pyridin-3-yl)pyrimidin-2-yl)amino)phenyl)carbamoyl)phenyl)carbamoyl)cyclohex-2-ene-1-carboxylate (**1aR-IN-7**):**

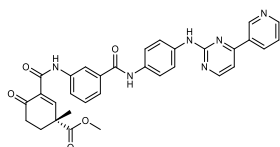

Compound **S5R** (50.0 mg, 0.236 mmol, 1.25 eq.) was dissolved in anhydrous dimethylformamide (0.625 mL) in a flame-dried vial under a nitrogen atmosphere, HBTU (89.4 mg, 0.236 mmol, 1.25 eq.) and *N*-methylmorpholine (83  $\mu$ L, 0.754 mmol, 4.0 eq.) were added and the mixture was stirred at 25°C. After 30 minutes an anhydrous DMF solution (0.625 mL) of compound **S23** (72.1 mg, 0.189 mmol, 1 eq.) was added and the reaction mixture was stirred at 25°C for 3 days. The reaction was monitored by HPLC-MS and when the starting material was consumed the reaction mixture was diluted with ethyl acetate, washed two times with a 5% citric acid solution, two times with a saturated aqueous Na<sub>2</sub>CO<sub>3</sub> solution, and two times with brine. The organic phase was dried over anhydrous Na<sub>2</sub>SO<sub>4</sub>, filtered, then evaporated under reduced pressure. The resulting crude product was purified by preparative RP-HPLC using a gradient method on a Gemini<sup>®</sup> 5 $\mu$ m C18 110 Å column (H<sub>2</sub>O:MeCN = 95:5 (0.1 % HCOOH) to 100% MeCN (0.1 % HCOOH)). Compound **1aR-IN-7** was obtained as a yellow solid (27.1 mg, 25%).

**HRMS** (ESI-TTOF) *m/z* [M+H]<sup>+</sup> calculated for C<sub>32</sub>H<sub>29</sub>N<sub>6</sub>O<sub>5</sub> 577.2193 found 577.2183

**<sup>1</sup>H NMR** (500 MHz, CDCl<sub>3</sub>): δ 9.13 (s, 1H), 8.64 – 8.54 (m, 1H), 8.39 (d, *J* = 5.1 Hz, 1H), 8.34 (d, *J* = 8.2 Hz, 1H), 8.16 (s, 1H), 8.08 (s, 1H), 7.64 (d, *J* = 7.7 Hz, 2H), 7.62 – 7.60 (m, 2H), 7.54 (d, *J* = 7.6 Hz, 2H), 7.45 – 7.39 (m, 1H), 7.37 (t, *J* = 7.9 Hz, 1H), 7.09 (d, *J* = 5.1 Hz, 1H), 3.70 (s, 3H), 2.60 (dt, *J* = 11.8, 5.8 Hz, 2H), 2.44 (dt, *J* = 12.4, 5.7 Hz, 1H), 1.97 (ddd, *J* = 14.4, 9.5, 5.5 Hz, 1H), 1.47 (s, 3H).

**<sup>13</sup>C NMR** (125 MHz, CDCl<sub>3</sub>) partial: δ 199.4, 173.4, 166.2, 162.2, 162.0, 161.0, 160.2, 158.9, 150.6, 147.8, 137.3, 136.1, 135.9, 135.3, 133.4, 133.2, 129.4, 128.8, 124.4, 124.1, 123.8, 121.4, 120.1, 119.3, 107.9, 52.9, 45.1, 35.7, 31.8, 24.4;

**Preparation of methyl (R)-1-methyl-3-((4-methyl-3-((4-((4-(pyridin-3-yl)pyrimidin-2-yl)amino)phenyl)carbamoyl)phenyl)carbamoyl)-4-oxocyclohex-2-ene-1-carboxylate (1aR-IN-9):**

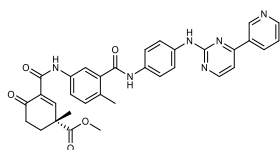

Compound **S5R** (50.0 mg, 0.236 mmol, 1.25 eq.) was dissolved in anhydrous dimethylformamide (0.625 mL) in a flame-dried vial under a nitrogen atmosphere, HBTU (89.4 mg, 0.236 mmol, 1.25 eq.) and *N*-methylmorpholine (83 μL, 0.754 mmol, 4.0 eq.) were added and the mixture was stirred at 25°C. After 30 minutes an anhydrous DMF solution (0.625 mL) of compound **S24** (74.7 mg, 0.189 mmol, 1 eq.) was added and the reaction mixture was stirred at 25°C for 3 days. The reaction was monitored by HPLC-MS and when the starting material was consumed the reaction mixture was diluted with ethyl acetate, washed two times with a 5% citric acid solution, two times with a saturated aqueous Na<sub>2</sub>CO<sub>3</sub> solution, and two times with brine. The organic phase was dried over anhydrous Na<sub>2</sub>SO<sub>4</sub>, filtered, then evaporated under reduced pressure. The resulting crude product was purified by preparative RP-HPLC using a gradient method on a Gemini<sup>®</sup> 5 μm C18 110 Å column (H<sub>2</sub>O:MeCN = 95:5 (0.1 % HCOOH) to 100% MeCN (0.1 % HCOOH)). Compound **1aR-IN-9** was obtained as a yellow solid (26.4 mg, 24%).

**HRMS** (ESI-TTOF) *m/z* [M+H]<sup>+</sup> calculated for C<sub>33</sub>H<sub>31</sub>N<sub>6</sub>O<sub>5</sub> 591.2355 found 591.2362

**<sup>1</sup>H NMR** (500 MHz, CDCl<sub>3</sub>): δ 11.83 (s, 2H), 10.73 (s, 1H), 9.40 (s, 1H), 8.85 (s, 1H), 8.71 (d, *J* = 8.1 Hz, 1H), 8.46 – 8.38 (m, 1H), 8.21 (s, 1H), 8.14 (s, 1H), 7.91 (s, 1H), 7.81 (d, *J* = 8.7 Hz, 1H), 7.68 – 7.59 (m, 4H), 7.44 (dd, *J* = 8.2, 2.2 Hz, 1H), 7.29 (d, *J* = 5.5 Hz, 1H), 7.18 (d, *J* = 8.3 Hz, 1H), 3.76 (s, 3H), 2.75 – 2.59 (m, 2H), 2.51 (dt, *J* = 12.6, 5.8 Hz, 1H), 2.44 (s, 3H), 2.02 (ddd, *J* = 14.3, 9.7, 5.0 Hz, 1H), 1.53 (s, 3H).

**<sup>13</sup>C NMR** (125 MHz, CDCl<sub>3</sub>) partial: δ 199.7, 173.4, 167.8, 162.0, 160.8, 139.3, 136.6, 135.7, 134.9, 134.0, 133.1, 132.0, 129.0, 122.5, 121.6, 121.1, 119.2, 107.2, 53.1, 45.2, 35.9, 32.1, 24.7, 19.5;

**Preparation of methyl (*R*)-1-methyl-3-((2-methyl-5-((4-((4-(pyridin-3-yl)pyrimidin-2-yl)amino)phenyl)carbonyl)phenyl)carbonyl)-4-oxocyclohex-2-ene-1-carboxylate (**1aR-IN-10**):**

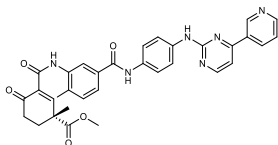

Compound **S5R** (16.1 mg, 0.076 mmol, 1.25 eq.) was dissolved in anhydrous dimethylformamide (0.200 mL) in a flame-dried vial under a nitrogen atmosphere, HBTU (28.7 mg, 0.076 mmol, 1.25 eq.) and *N*-methylmorpholine (27  $\mu$ L, 0.242 mmol, 4.0 eq.) were added and the mixture was stirred at 25°C. After 30 minutes an anhydrous DMF solution (0.200 mL) of compound **S25** (24.0 mg, 0.061 mmol, 1 eq.) was added and the reaction mixture was stirred at 25°C for 3 days. The reaction was monitored by HPLC-MS and when the starting material was consumed the reaction mixture was diluted with ethyl acetate, washed two times with a 5% citric acid solution, two times with a saturated aqueous  $\text{Na}_2\text{CO}_3$  solution, and two times with brine. The organic phase was dried over anhydrous  $\text{Na}_2\text{SO}_4$ , filtered, then evaporated under reduced pressure. The resulting crude product was purified by preparative RP-HPLC using a gradient method on a Gemini<sup>®</sup> 5 $\mu$ m C18 110 Å column ( $\text{H}_2\text{O}:\text{MeCN} = 95:5$  (0.1 %  $\text{HCOOH}$ ) to 100%  $\text{MeCN}$  (0.1 %  $\text{HCOOH}$ )). Compound **1aR-IN-10** was obtained as a yellow solid (4.4 mg, 12%).

**HRMS** (ESI-TTOF)  $m/z$   $[\text{M}+\text{H}]^+$  calculated for  $\text{C}_{33}\text{H}_{31}\text{N}_6\text{O}_5$  591.2355 found 591.2359

**$^1\text{H}$  NMR** (500 MHz,  $\text{CDCl}_3$ ):  $\delta$  10.82 (s, 1H), 9.31 (s, 1H), 8.72 (d,  $J = 1.9$  Hz, 1H), 8.50 (d,  $J = 5.2$  Hz, 2H), 8.43 (d,  $J = 8.0$  Hz, 2H), 8.30 (s, 1H), 8.07 (s, 1H), 7.58 (s, 1H), 7.51 (s, 1H), 7.72 – 7.61 (m, 2H), 7.33 (d,  $J = 8.0$  Hz, 1H), 7.18 (d,  $J = 4.8$  Hz, 1H), 3.79 (s, 3H), 2.78 – 2.64 (m, 2H), 2.56 (dt,  $J = 12.5, 5.8$  Hz, 1H), 2.44 (s, 3H), 2.06 (ddd,  $J = 14.3, 10.0, 5.0$  Hz, 1H), 1.57 (s, 3H).

**$^{13}\text{C}$  NMR** (125 MHz,  $\text{CDCl}_3$ ) partial:  $\delta$  199.9, 173.4, 165.5, 162.8, 162.2, 160.8, 160.2, 158.7, 151.3, 148.3, 136.6, 135.8, 135.1, 133.7, 133.5, 132.2, 131.2, 129.3, 124.5, 124.1, 121.3, 120.3, 119.4, 108.2, 53.2, 45.3, 36.0, 32.2, 24.8, 18.4.

**Preparation of 3-bromo-4-(bromomethyl)-7-(diethylamino)-2*H*-chromen-2-one (S46):**

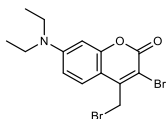

Compound **S46** was synthesized according to the literature procedure.<sup>20</sup>

**Preparation of 1-((3-bromo-7-(diethylamino)-2-oxo-4a,8a-dihydro-2H-chromen-4-yl)methyl)-3-(2-((4-(3-((R)-3-(methoxycarbonyl)-3-methyl-6-oxocyclohex-1-ene-1-carboxamido)benzamido)-2-methylphenyl)amino)pyrimidin-4-yl)pyridin-1-ium bromide (Photocaged 1aR-IN-8):**

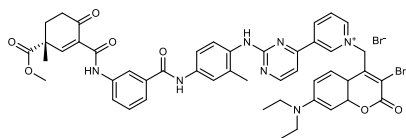

**1aR-IN-8** (5.4 mg, 0.0091 mmol, 1 eq.) was dissolved in HPLC grade acetonitrile (0.5 mL) in a flame-dried, brown vial. To this solution was added **S46** (4.1 mg, 0.011 mmol, 1.15 eq.) and the reaction mixture was stirred at 60°C in the dark (avoiding decomposition) for 16 hours. The reaction mixture was evaporated, then the resulting crude product was purified by preparative RP-HPLC using a gradient method on a Gemini® 5µm C18 110 Å column (H<sub>2</sub>O:MeCN = 95:5 (0.1 % HCOOH) to 100% MeCN (0.1 % HCOOH)). Compound **Photocaged 1aR-IN-8** was obtained as a yellow solid (3.0 mg, 40%).

**HRMS** (ESI-TTOF) *m/z* [*M*]<sup>+</sup> calculated for C<sub>47</sub>H<sub>47</sub>N<sub>7</sub>O<sub>7</sub>Br 898.2558 found 898.2567

**<sup>1</sup>H NMR** (500 MHz, CDCl<sub>3</sub>): δ 10.80 (s, 1H), 9.97 (s, 1H), 9.06 (s, 1H), 8.96 (d, *J* = 8.5 Hz, 2H), 8.48 (d, *J* = 4.9 Hz, 1H), 8.19 (d, *J* = 4.9 Hz, 2H), 8.04 (t, *J* = 7.1 Hz, 1H), 7.92 (d, *J* = 9.2 Hz, 1H), 7.86 (d, *J* = 8.0 Hz, 1H), 7.78 (d, *J* = 7.7 Hz, 1H), 7.66 (s, 1H), 7.50 (d, *J* = 7.9 Hz, 1H), 7.41 (q, *J* = 6.5, 5.0 Hz, 2H), 6.64 (d, *J* = 7.3 Hz, 1H), 6.47 (s, 2H), 6.42 (d, *J* = 2.5 Hz, 1H), 3.76 (s, 3H), 3.34 (q, *J* = 7.2 Hz, 4H), 2.76 (s, 3H), 2.71 – 2.59 (m, 2H), 2.51 (dt, *J* = 12.9, 6.1 Hz, 1H), 2.24 (s, 3H), 2.02 (td, *J* = 14.3, 9.7, 5.4 Hz, 2H), 1.91 (s, 3H), 1.54 (s, 3H), 1.14 (t, *J* = 7.0 Hz, 6H).

***N*-(14-azido-3,6,9,12-tetraoxatetradecyl)-2-((2-(2,6-dioxopiperidin-3-yl)-1,3-dioxoisindolin-4-yl)oxy)acetamide (S47):**

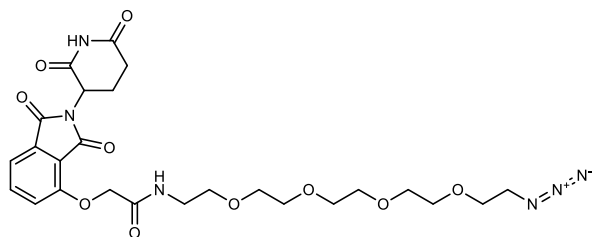

Compound **S47** was purchased from BroadPharm, USA.

**Preparation of (1-(1-((2-(2,6-dioxopiperidin-3-yl)-1,3-dioxoisindolin-4-yl)oxy)-2-oxo-6,9,12,15-tetraoxa-3-azaheptadecan-17-yl)-1*H*-1,2,3-triazol-4-yl)methyl (1*R*)-1-methyl-3-((3-((3-methyl-4-((4-(pyridin-3-yl)pyrimidin-2-yl)amino)phenyl)carbamoyl)phenyl)carbamoyl)-4-oxocyclohex-2-ene-1-carboxylate (PRT\_1):**

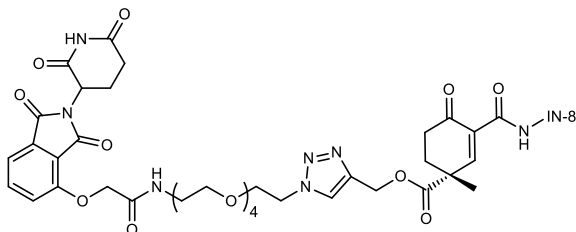

To a solution of compound **1bR-IN-8** (32.0 mg, 0.520 mmol, 1.5 eq.) and compound **S47** (20.0 mg, 0.347 mmol, 1 eq.) in methylene chloride (0.139 mL) was added a solution of sodium-ascorbate (3.4 mg, 0.017 mmol, 0.5 eq.) and copper(II) sulfate pentahydrate (0.87 mg, 0.0035 mmol, 0.1 eq.) in water (0.139 mL) and methanol (0.069 mL). The reaction mixture was stirred vigorously at 25°C for 1 hour. When the starting material was consumed, the reaction mixture was diluted with 2.5 mL methylene chloride and washed with water two times. The organic phase was dried over anhydrous Na<sub>2</sub>SO<sub>4</sub>, filtered, then evaporated under reduced pressure then the resulting crude product was purified by preparative RP-HPLC using a gradient method on a Gemini<sup>®</sup> 5µm C18 110 Å column (H<sub>2</sub>O:MeCN = 95:5 (0.1 % HCOOH) to 100% MeCN (0.1 % HCOOH)). **PRT\_1** was isolated as a yellow oil (14.6 mg, 35%).

**HRMS** (ESI-TTOF) *m/z* [M]<sup>+</sup> calculated for C<sub>60</sub>H<sub>63</sub>N<sub>12</sub>O<sub>15</sub> 1191.4530 found 1191.4475

**<sup>1</sup>H NMR** (600 MHz, CDCl<sub>3</sub>): δ 10.84 – 10.81 (m, 1H), 9.74 – 9.63 (m, 1H), 9.23 (s, 1H), 8.70 (s, 1H), 8.48 (d, *J* = 5.2 Hz, 1H), 8.46 (d, *J* = 3.7 Hz, 1H), 8.34 (dt, *J* = 8.0, 1.9 Hz, 1H), 8.23 (s, 1H), 8.25 – 8.20 (m, 1H), 7.94 (d, *J* = 8.7 Hz, 1H), 7.82 (s, 1H), 7.73 – 7.72 (m, 1H), 7.70 (dd, *J* = 7.9, 1.8 Hz, 1H), 7.67 (ddd, *J* = 8.3, 7.3, 1.0 Hz, 1H), 7.65 – 7.63 (m, 1H), 7.62 – 7.56 (m, 1H), 7.51 (dd, *J* = 8.2, 3.1 Hz, 1H), 7.46 (d, *J* = 7.3 Hz, 1H), 7.46 – 7.40 (m, 2H), 7.14 (d, *J* = 5.1 Hz, 1H), 7.12 (d, *J* = 8.5 Hz, 1H), 7.11 (s, 1H), 5.34 – 5.25 (m, 2H), 5.02 – 4.94 (m, 1H), 4.63 – 4.54 (m, 2H), 4.51 (t, *J* = 5.1 Hz, 2H), 3.83 (t, *J* = 5.0 Hz, 2H), 3.66 – 3.53 (m, 14H), 3.53 – 3.49 (m, 2H), 2.87 – 2.81 (m, 1H), 2.80 – 2.73 (m, 2H), 2.71 – 2.57 (m, 2H), 2.53 – 2.46 (m, 1H), 2.33 (s, 3H), 2.15 – 2.09 (m, 1H), 2.05 – 1.97 (m, 1H), 1.52 (s, 3H).

**<sup>13</sup>C NMR** (151 MHz, CDCl<sub>3</sub>): δ 199.6, 199.5, 172.7, 171.62, 171.59, 168.71, 168.70, 166.9, 166.8, 166.7, 166.7, 165.8, 165.2, 162.6, 161.79, 161.77, 160.9, 160.64, 160.62, 159.0, 154.3, 151.4, 148.4, 141.9, 138.00, 137.99, 136.8, 136.00, 135.99, 134.6, 134.3, 133.7, 133.6, 132.7, 130.3, 130.2, 129.44, 129.43, 129.02, 129.01, 125.1, 124.0, 123.9, 123.7, 123.5, 123.97, 122.95, 122.57, 122.55, 119.3, 118.7, 118.61, 118.59, 117.9, 117.2, 107.9, 70.55 – 70.22 (m), 69.4, 69.2, 67.80, 67.79, 59.0, 50.3, 49.3, 45.1, 39.0, 35.7, 31.9, 31.4, 24.3, 22.7, 18.3;

### Preparation of (*E*)-2-cyano-4,4-dimethylpent-2-enoic acid (**S48**):

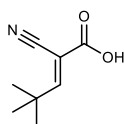

Pivaldehyde (2.03 g, 23.5 mmol, 2 eq.) was added to a solution of 2-cyanoacetic acid (1.0 g, 11.8 mmol) in pyridine (5 mL). Pyrrolidine (201 mg, 2.82 mmol, 0.24 eq.) was added, and the reaction mixture was stirred for 18 hours at 25°C. The mixture was then poured onto cc. HCl (6 mL) and water (10 mL) and extracted with ethyl acetate (3 × 10 mL). The combined organic layers were dried over anhydrous Na<sub>2</sub>SO<sub>4</sub> and filtered, and the solvent was evaporated under reduced pressure to give compound **S48** as a white solid (1.53 g, 85%).

**HRMS** (ESI-TTOF) *m/z* [M+H]<sup>+</sup> calculated for C<sub>8</sub>H<sub>12</sub>NO<sub>2</sub> 154.0868 found 154.0864

**<sup>1</sup>H NMR** (500 MHz, CDCl<sub>3</sub>): δ 7.72 (s, 1H), 1.34 (s, 9H).

**<sup>13</sup>C NMR** (125 MHz, CDCl<sub>3</sub>): δ 174.3, 166.7, 113.6, 105.3, 35.6, 28.9;

### Preparation of (*E*)-3-(2-cyano-4,4-dimethylpent-2-enamido)-*N*-(3-methyl-4-((4-(pyridin-3-yl)pyrimidin-2-yl)amino)phenyl)benzamide (**CA-IN-8**):

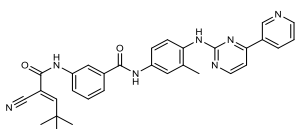

Compound **S48** (77.3 mg, 0.504 mmol, 2 eq.) was dissolved in anhydrous dimethylformamide (1.0 mL) in a flame-dried vial under a nitrogen atmosphere, HBTU (191.3 mg, 0.504 mmol, 2 eq.) and *N*-methylmorpholine (111 μL, 1.01 mmol, 4.0 eq.) were added and the mixture was stirred at 25°C. After 30 minutes an anhydrous DMF solution (1.0 mL) of compound **S22** (100 mg, 0.252 mmol, 1 eq.) was added and the reaction mixture was stirred at 25°C for 3 days. The reaction was monitored by HPLC-MS and when the starting material was consumed the reaction mixture was diluted with ethyl acetate, washed two times with a 5% citric acid solution, two times with a saturated aqueous Na<sub>2</sub>CO<sub>3</sub> solution, and two times with brine. The organic phase was dried over anhydrous Na<sub>2</sub>SO<sub>4</sub>, filtered, then evaporated under reduced pressure. The resulting crude product was purified by preparative RP-HPLC using a gradient method on a Gemini<sup>®</sup> 5μm C18 110 Å column (H<sub>2</sub>O:MeCN = 95:5 (0.1 % HCOOH) to 100% MeCN (0.1 % HCOOH)). Compound **CA-IN-8** was obtained as a yellow solid (40.2 mg, 25%).

**HRMS** (ESI-TTOF) *m/z* [M+H]<sup>+</sup> calculated for C<sub>31</sub>H<sub>30</sub>N<sub>7</sub>O<sub>2</sub> 532.2460 found 532.2448

The structure was found to be in an equilibrium between the acyclic and cyclic forms (see below) in CDCl<sub>3</sub> in a 1:0.76 ratio.

Acyclic form:

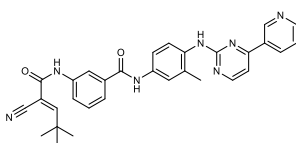

**<sup>1</sup>H NMR** (500 MHz, CDCl<sub>3</sub>): δ 9.24 (s, 1H), 8.68 (s, 1H), 8.45 (d, *J* = 5.2 Hz, 1H), 8.34 – 8.30 (m, 1H), 8.23 (s, 1H), 8.19 (s, 1H), 8.07 (t, *J* = 1.9 Hz, 1H), 7.99 (t, *J* = 8.0 Hz, 1H), 7.78 (s, 1H), 7.77 – 7.75 (m, 1H), 7.72 – 7.67 (m, 1H), 7.57 (d, *J* = 2.5 Hz, 1H), 7.50 – 7.45 (m, 2H), 7.42 (t, *J* = 6.5 Hz, 1H), 7.11 (dd, *J* = 5.2, 1.45 Hz, 1H), 7.02 (s, 1H), 2.32 (s, 3H), 1.33 (s, 9H).

**<sup>13</sup>C NMR** (125 MHz, CDCl<sub>3</sub>): δ 170.9, 165.2, 162.7, 161.0, 159.2, 158.6, 151.5, 148.6, 137.5, 136.4, 134.4, 134.1, 133.8, 132.6, 130.4, 124.2, 124.0, 123.8, 123.7, 123.1, 122.8, 119.4, 118.9, 115.7, 108.1, 106.6, 35.2, 29.1, 18.4.

Cyclic form:

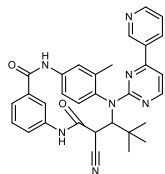

**<sup>1</sup>H NMR** (500 MHz, CDCl<sub>3</sub>): δ 9.24 (s, 1H), 8.67 (s, 1H), 8.45 (d, *J* = 5.2 Hz, 1H), 8.34 – 8.30 (m, 1H), 8.23 (s, 1H), 8.07 (t, *J* = 1.9 Hz, 1H), 7.99 (t, *J* = 8.0 Hz, 1H), 7.84 (t, *J* = 1.8 Hz, 1H), 7.77 – 7.75 (m, 1H), 7.72 – 7.67 (m, 1H), 7.60 (d, *J* = 2.5 Hz, 1H), 7.50 – 7.45 (m, 2H), 7.42 (t, *J* = 6.5 Hz, 1H), 7.11 (dd, *J* = 5.2, 1.45 Hz, 1H), 4.33 (d, *J* = 2.9 Hz, 1H), 3.83 (d, *J* = 2.9 Hz, 1H), 2.32 (s, 3H), 1.03 (s, 9H).

**<sup>13</sup>C NMR** (125 MHz, CDCl<sub>3</sub>): δ 164.7, 162.7, 161.0, 159.2, 156.4, 151.5, 148.6, 137.5, 136.4, 134.4, 134.0, 133.9, 132.8, 130.4, 124.1, 124.0, 123.8, 123.7, 123.1, 122.9, 119.9, 118.9, 114.2, 108.1, 66.4, 38.8, 34.6, 26.0, 18.4.

#### Preparation of 3-acetamido-*N*-(3-methyl-4-((4-(pyridin-3-yl)pyrimidin-2-yl)amino)phenyl)benzamide (IN-8a):

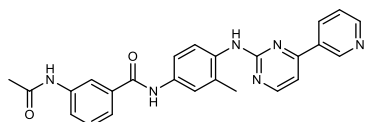

To a solution of **S22** (10.0 mg, 0.025 mmol, 1 eq.) in glacial acetic acid (0.125 mL), was added acetic anhydride dropwise (2.4 μL, 0.025 mmol, 1 eq.) dissolved in glacial acetic acid (0.125 mL) and the reaction mixture was stirred at 25°C for 2 hours. The reaction was monitored by HPLC-MS and when the starting material was consumed the reaction mixture was evaporated, then dissolved in ethyl acetate, the organic phase was washed four times with a saturated aqueous NaHCO<sub>3</sub> solution, and two times with brine. The organic phase was dried over anhydrous Na<sub>2</sub>SO<sub>4</sub> and filtered, and the solvent was evaporated under reduced pressure to give compound **IN-8a** as a yellow solid (6.8 mg, 62 %).

**HRMS** (ESI-TTOF) *m/z* [M]<sup>+</sup> calculated for C<sub>25</sub>H<sub>23</sub>N<sub>6</sub>O<sub>2</sub> 439.1877 found 439.1869

**<sup>1</sup>H NMR** (500 MHz, CDCl<sub>3</sub>): δ 10.17 (s, 1H), 10.13 (s, 1H), 9.24 (d, *J* = 2.1 Hz, 1H), 8.92 (s, 1H), 8.69 (dd, *J* = 4.8, 1.7 Hz, 1H), 8.49 (d, *J* = 5.1 Hz, 1H), 8.39 (dd, *J* = 6.0, 3.9 Hz, 1H), 8.08 (s, 1H), 7.82 (d, *J* = 8.2 Hz, 1H), 7.66 – 7.61 (m, 2H), 7.57 – 7.52 (m, 1H), 7.48 – 7.45 (m, 1H), 7.42 – 7.39 (m, 1H), 2.25 (s, 3H), 2.08 (s, 3H).

<sup>13</sup>C NMR (125 MHz, CDCl<sub>3</sub>) partial: δ 168.5, 165.3, 161.5, 161.4, 159.4, 151.4, 148.1, 139.5, 135.8, 135.7, 134.2, 133.6, 132.8, 132.3, 128.7, 125.6, 123.8, 122.2, 121.8, 118.5, 118.2, 107.3, 24.0, 18.4;



# NMR Spectra

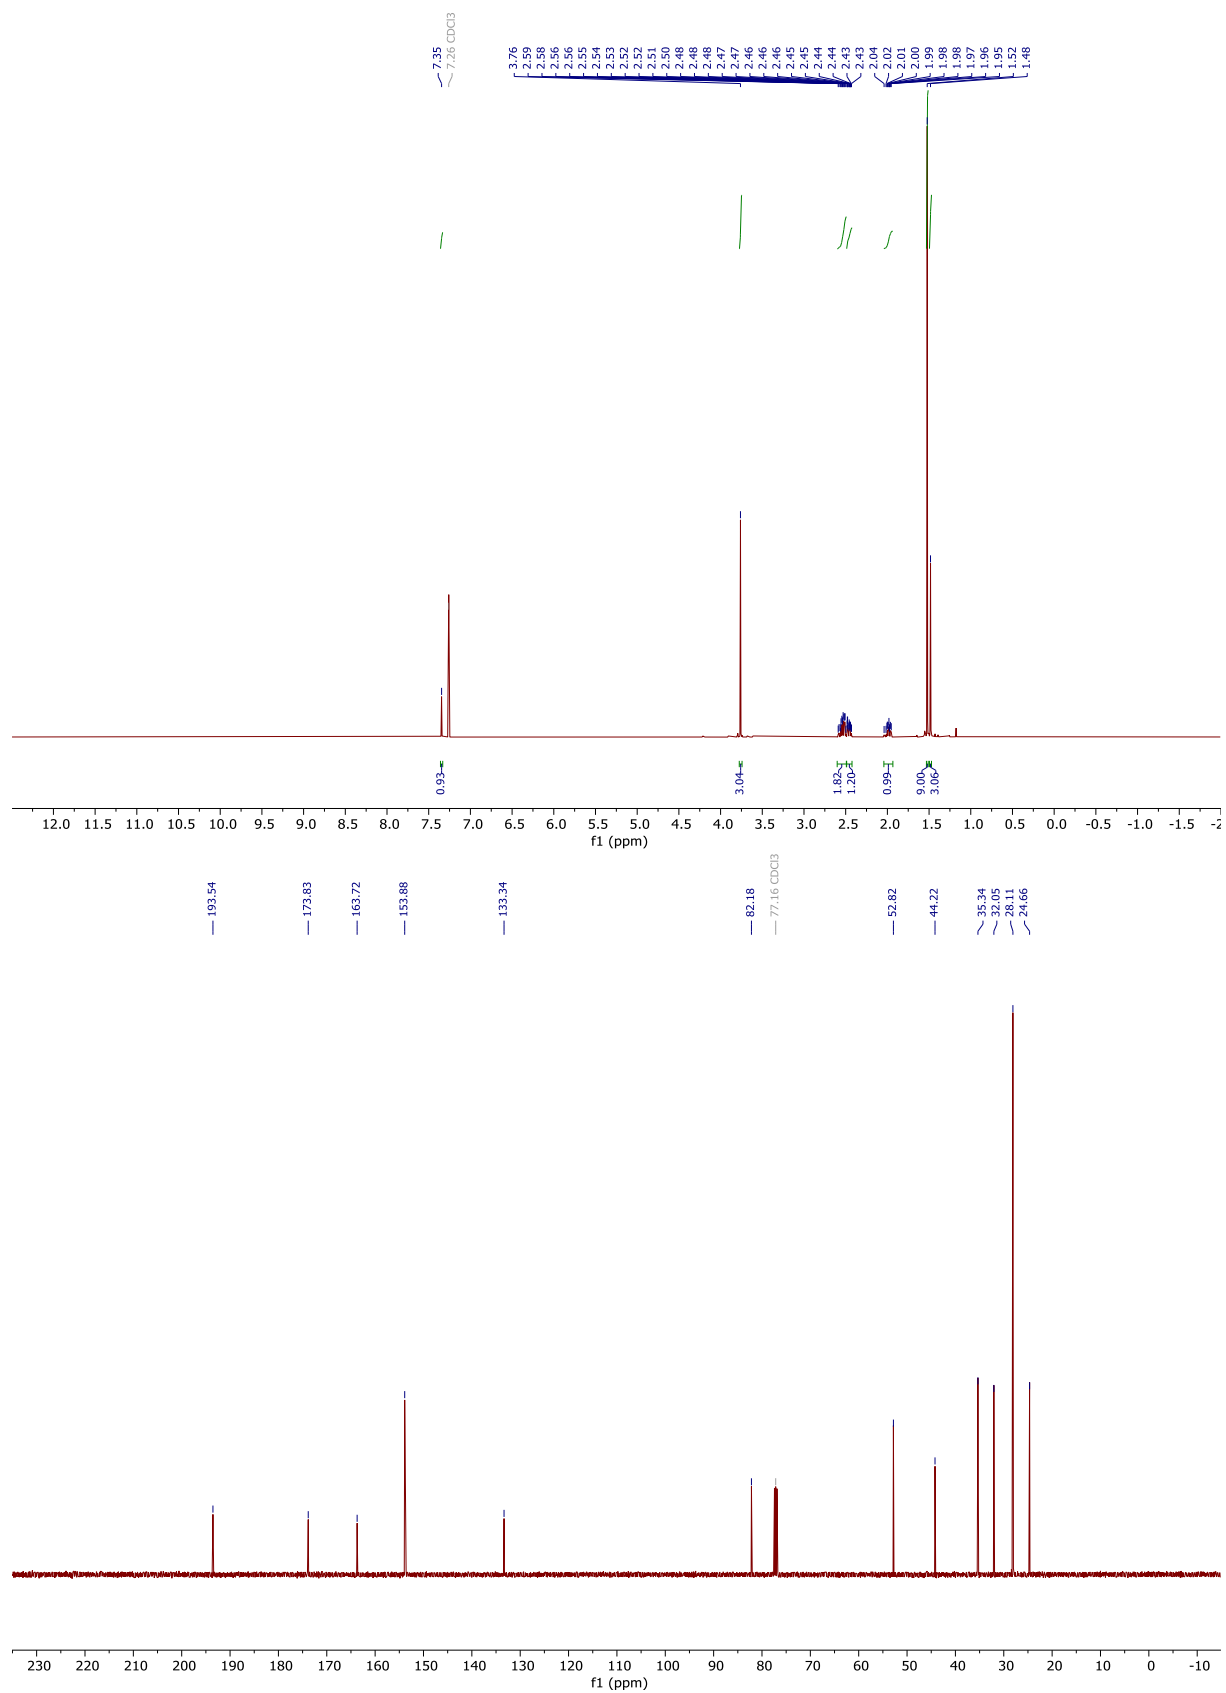

**Supplementary Fig. 17.** The <sup>1</sup>H-NMR (500 MHz) and <sup>13</sup>C-NMR (125 MHz) spectra of compound 4,4R, 4S in CDCl<sub>3</sub>

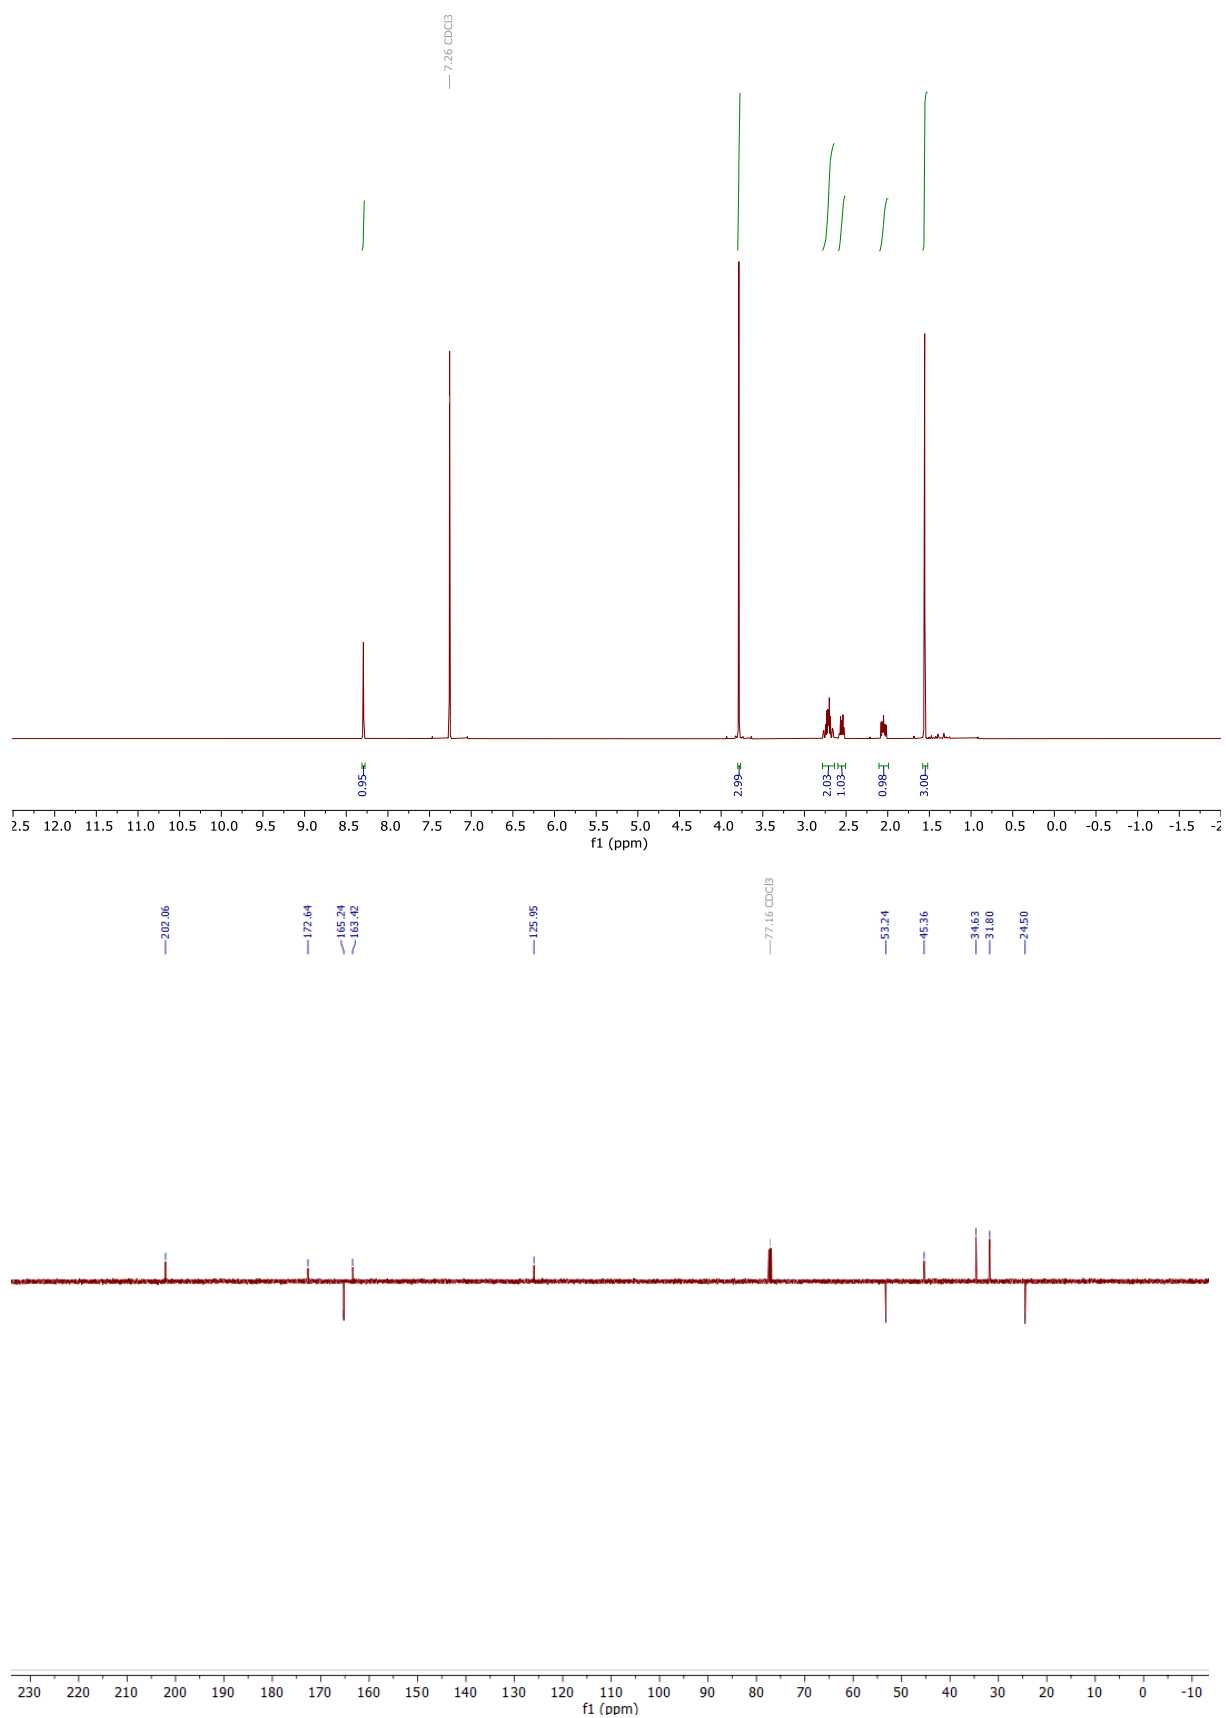

**Supplementary Fig. 18.** The <sup>1</sup>H-NMR (500 MHz) and APT-NMR (125 MHz) spectra of compound 5, 5R/5S in CDCl<sub>3</sub>

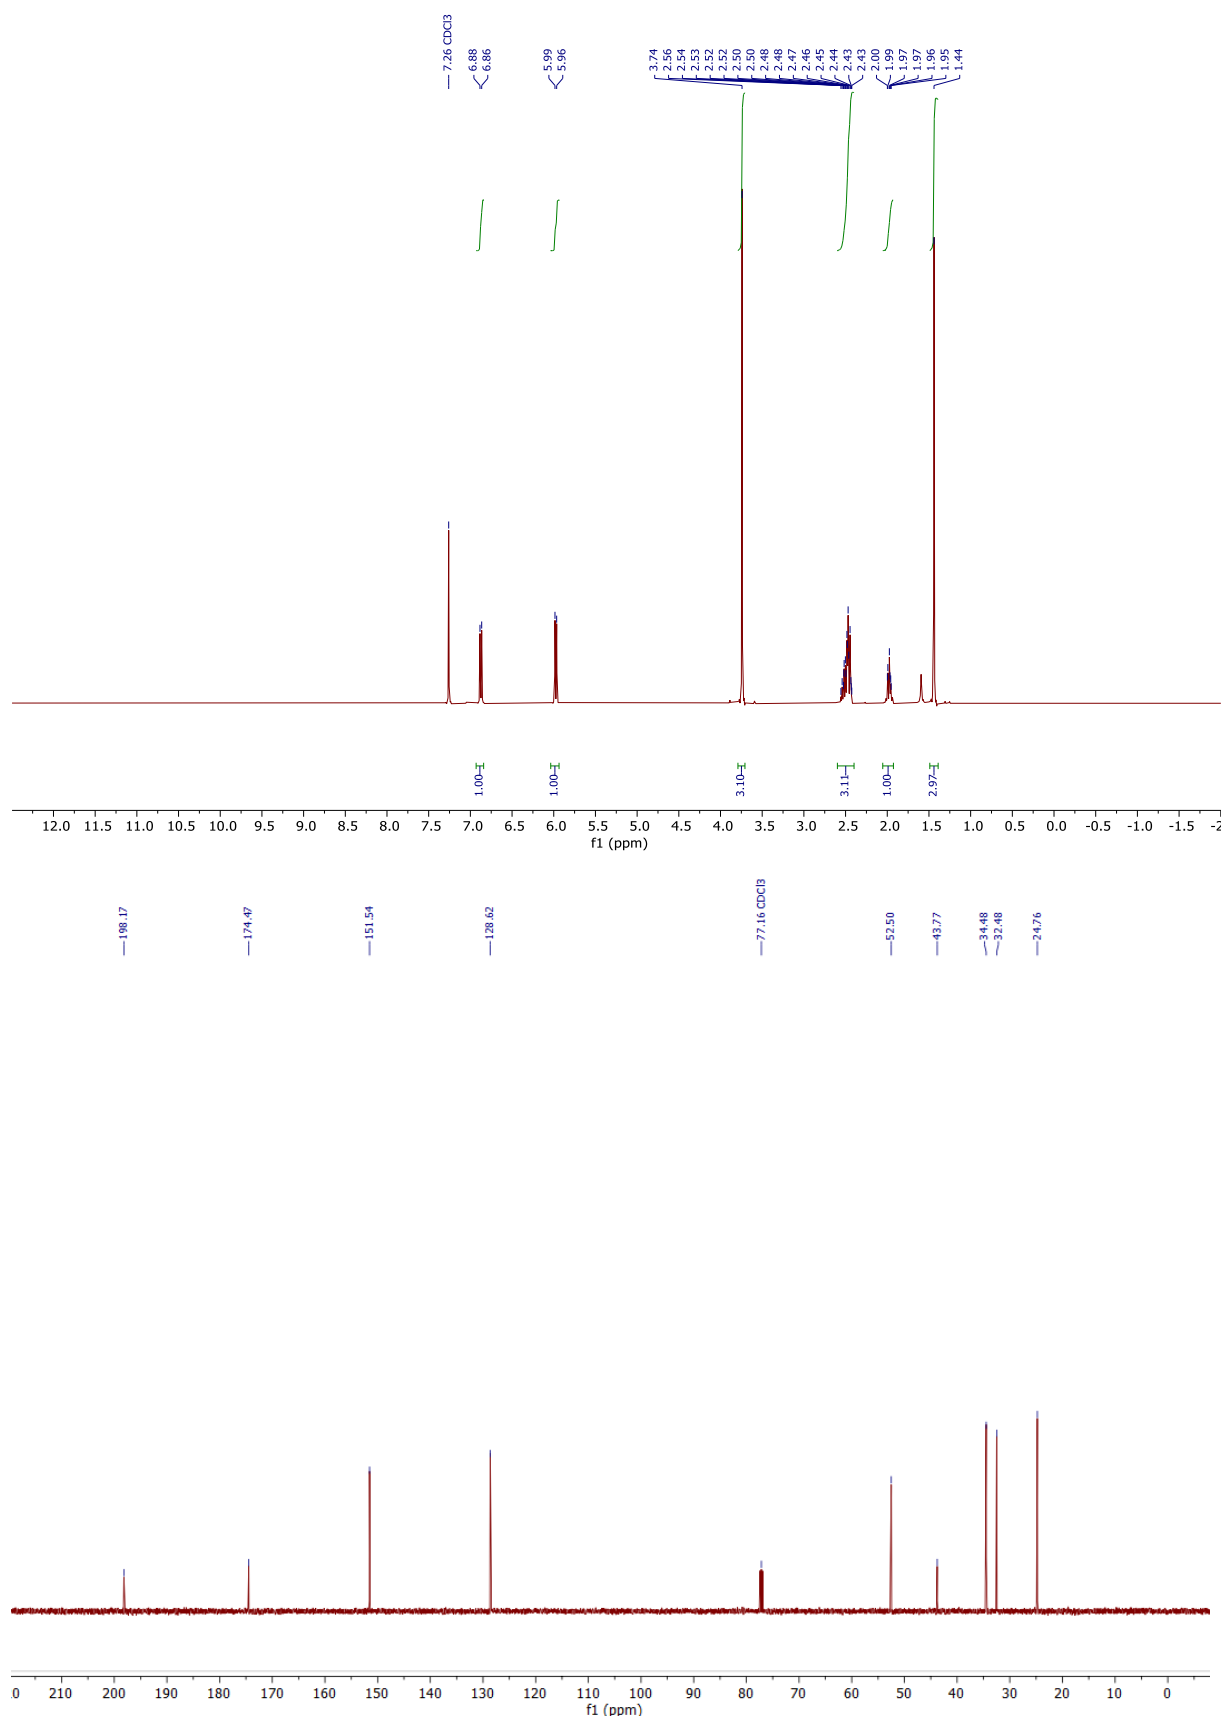

**Supplementary Fig. 19.** The <sup>1</sup>H-NMR (500 MHz) and <sup>13</sup>C-NMR (125 MHz) spectra of compound **S8** in CDCl<sub>3</sub>

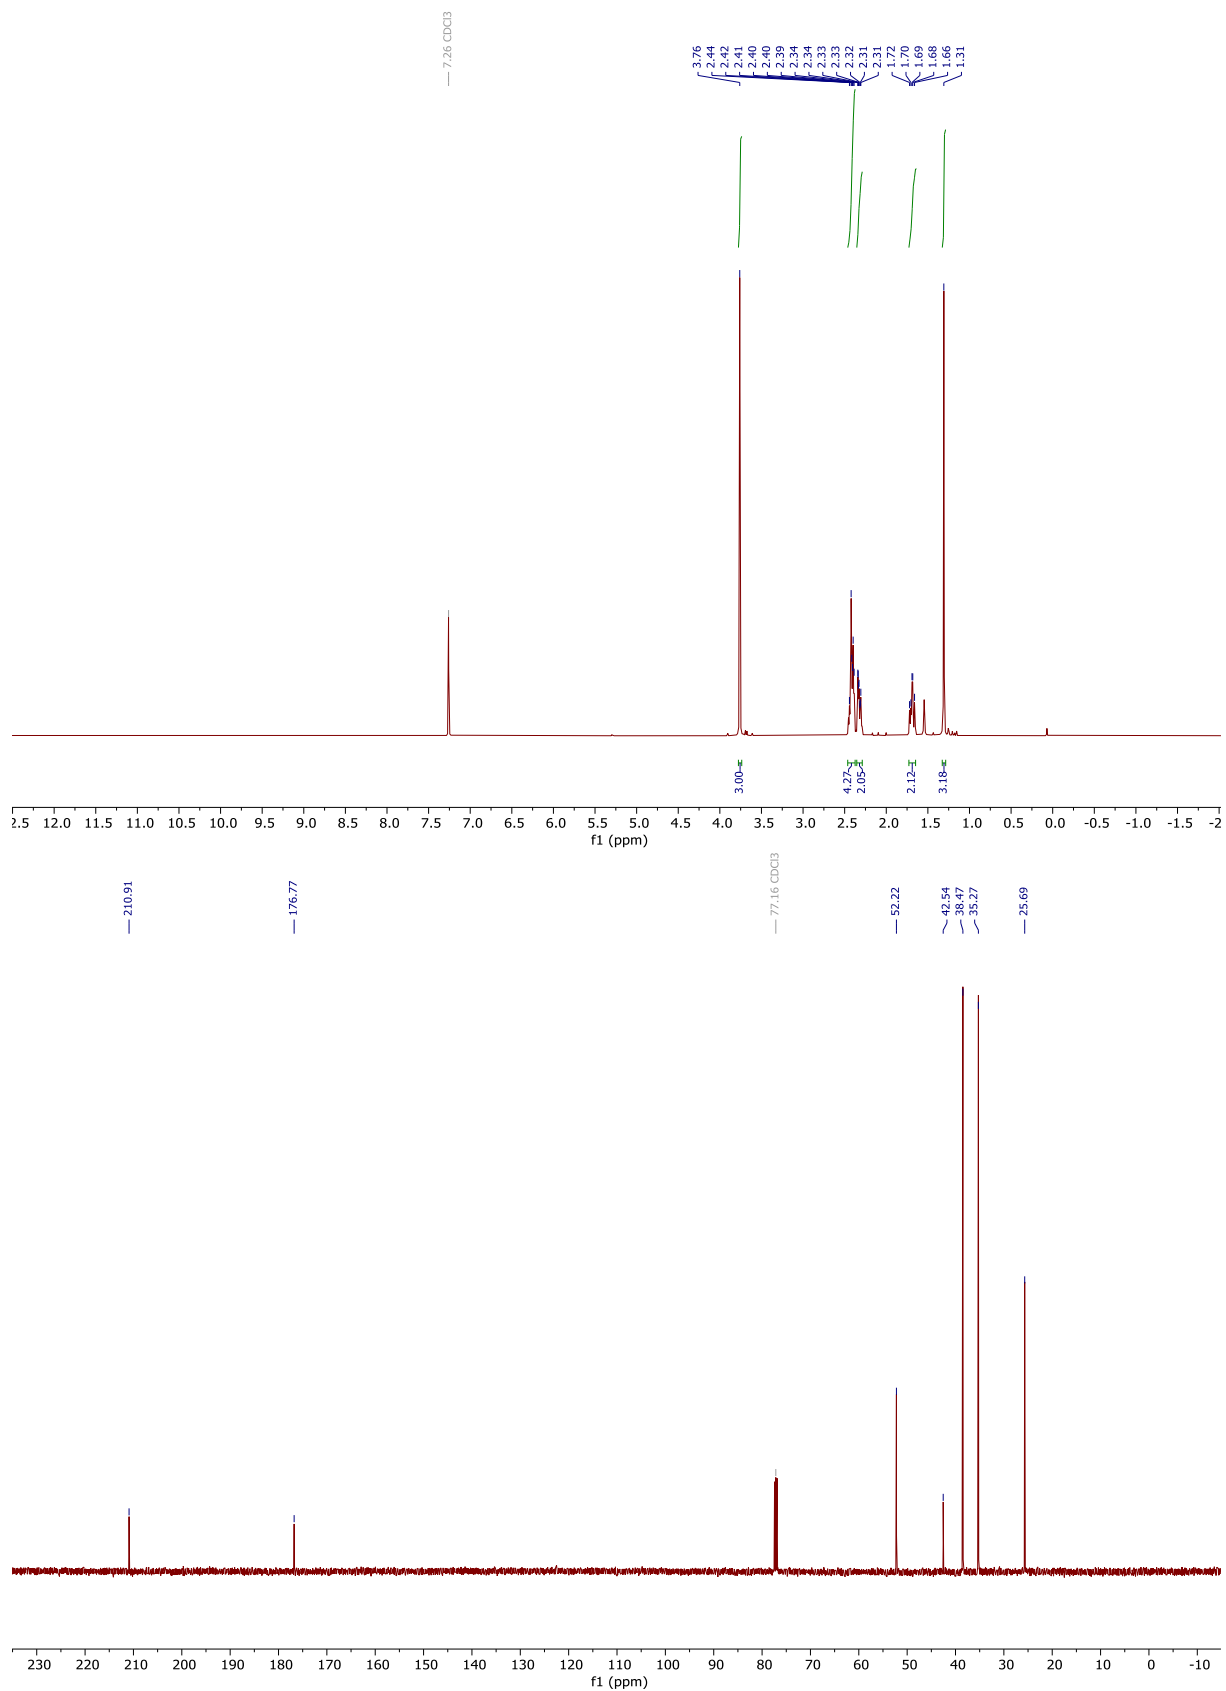

**Supplementary Fig. 20.** The <sup>1</sup>H-NMR (500 MHz) and <sup>13</sup>C-NMR (125 MHz) spectra of compound S9 in CDCl<sub>3</sub>

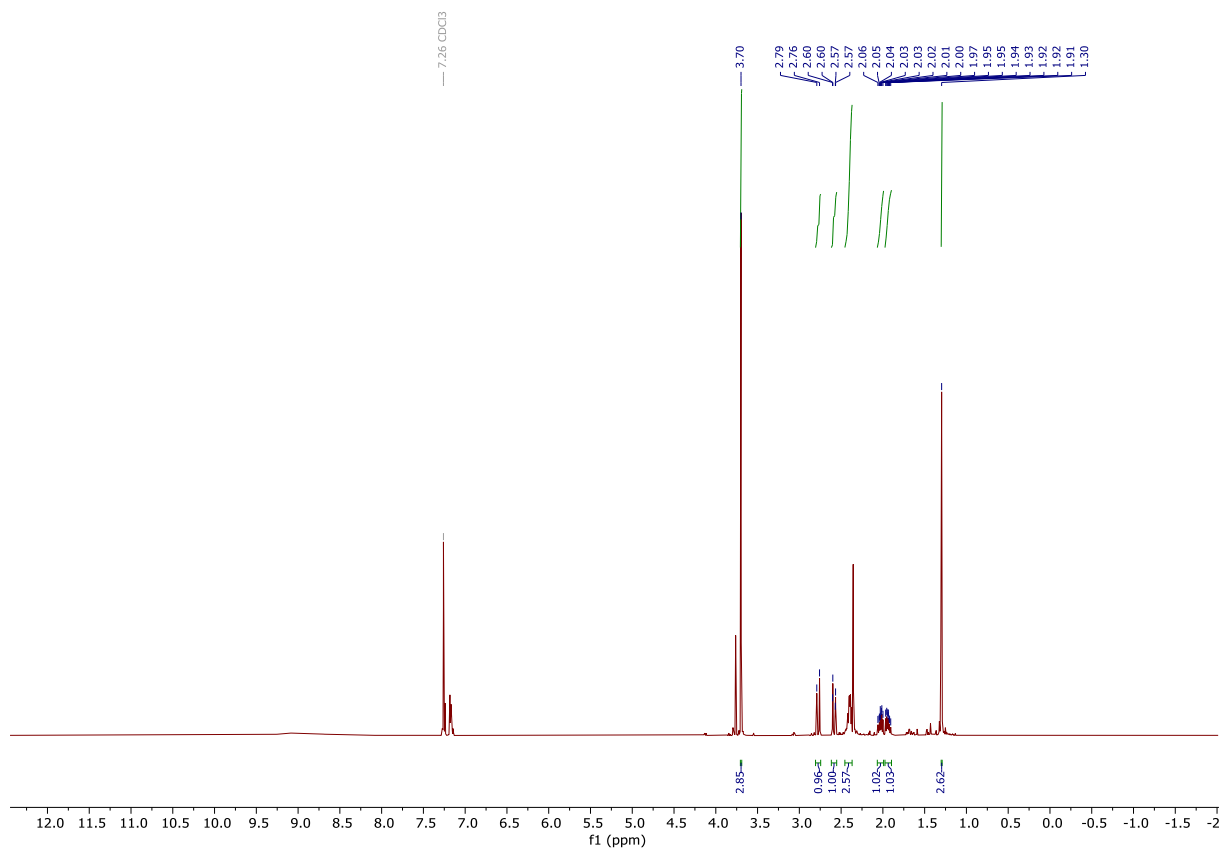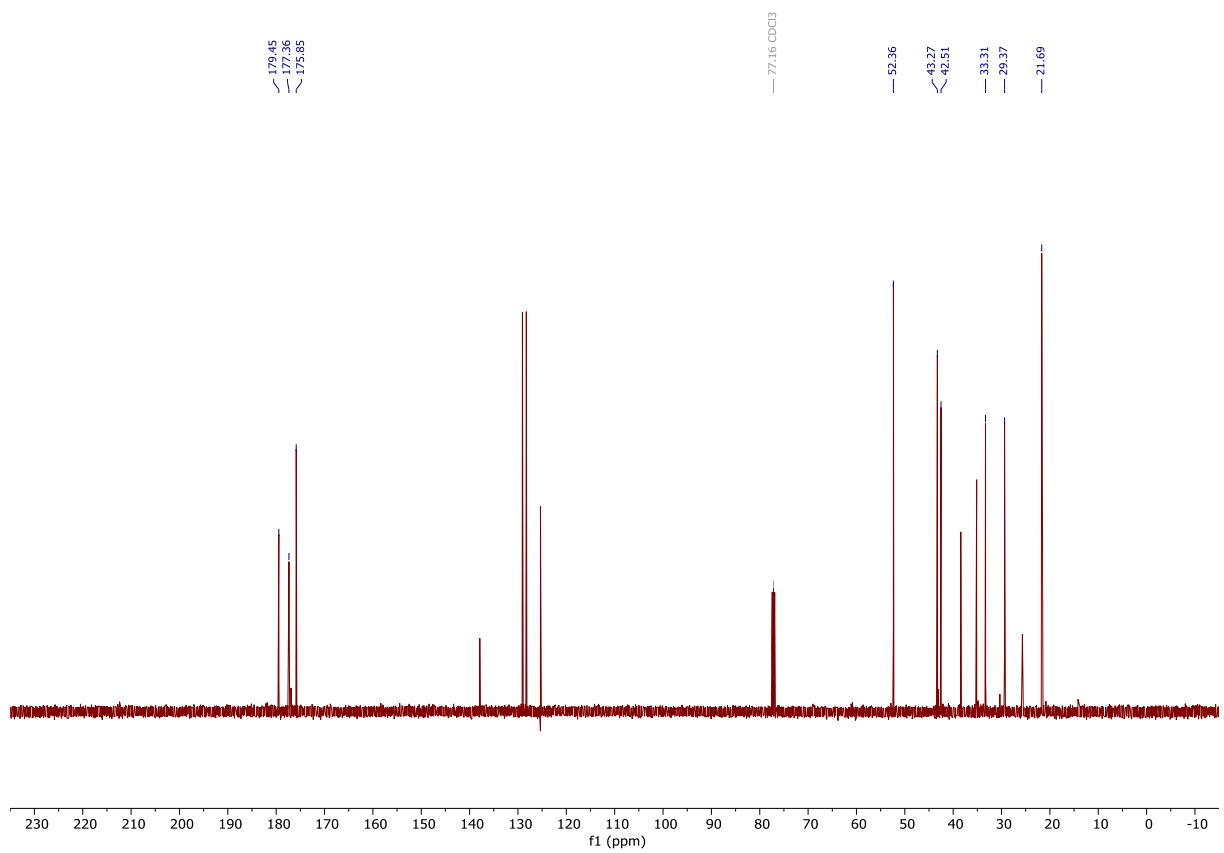

**Supplementary Fig. 21.** The <sup>1</sup>H-NMR (500 MHz) and <sup>13</sup>C-NMR (125 MHz) spectra of compound **S10** in CDCl<sub>3</sub>

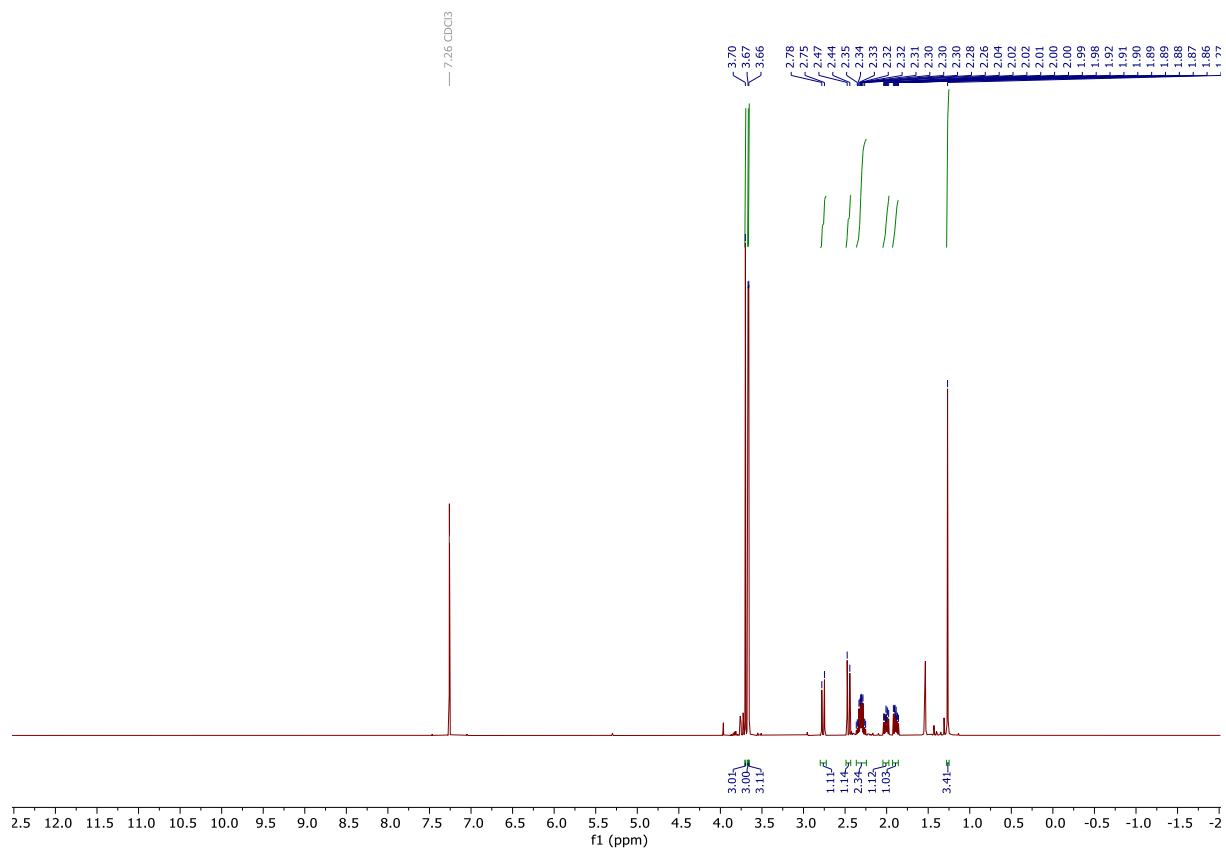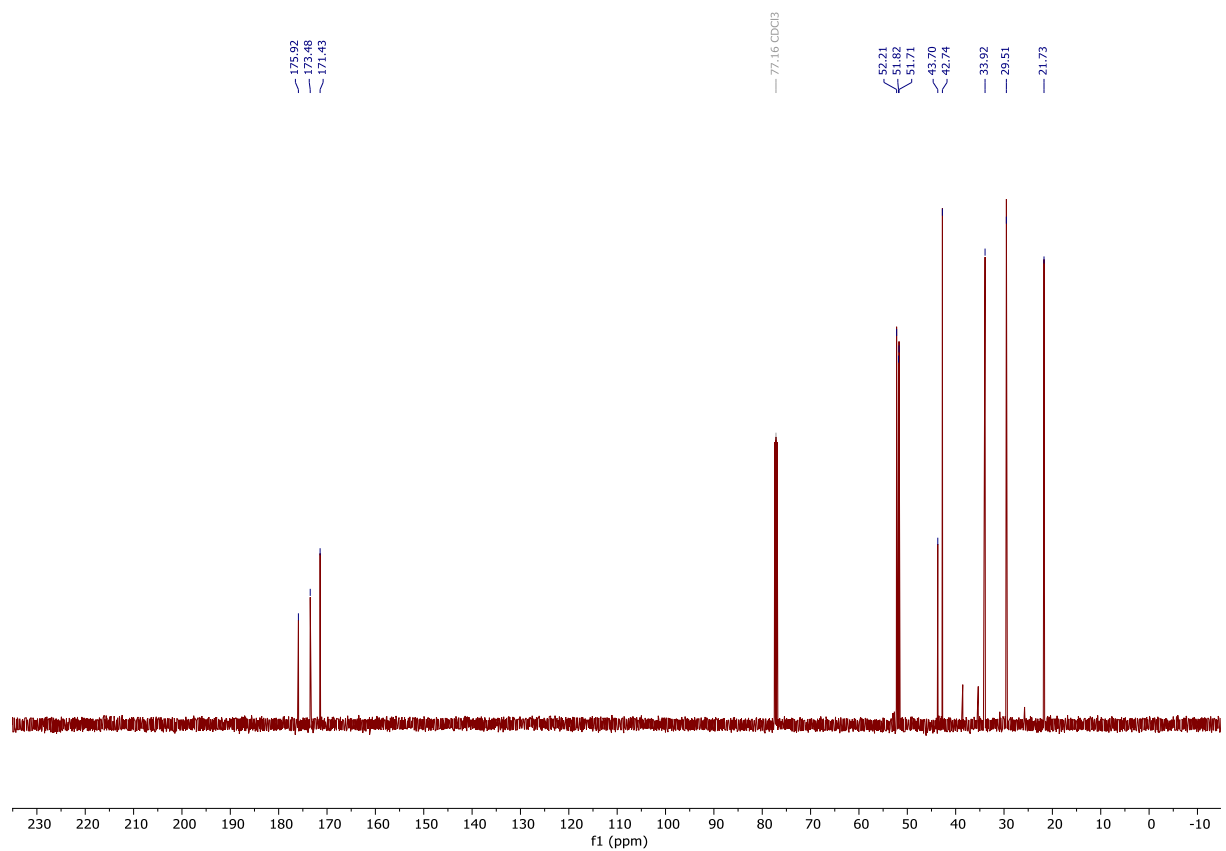

**Supplementary Fig. 22.** The <sup>1</sup>H-NMR (500 MHz) and <sup>13</sup>C-NMR (125 MHz) spectra of compound **S11** in CDCl<sub>3</sub>

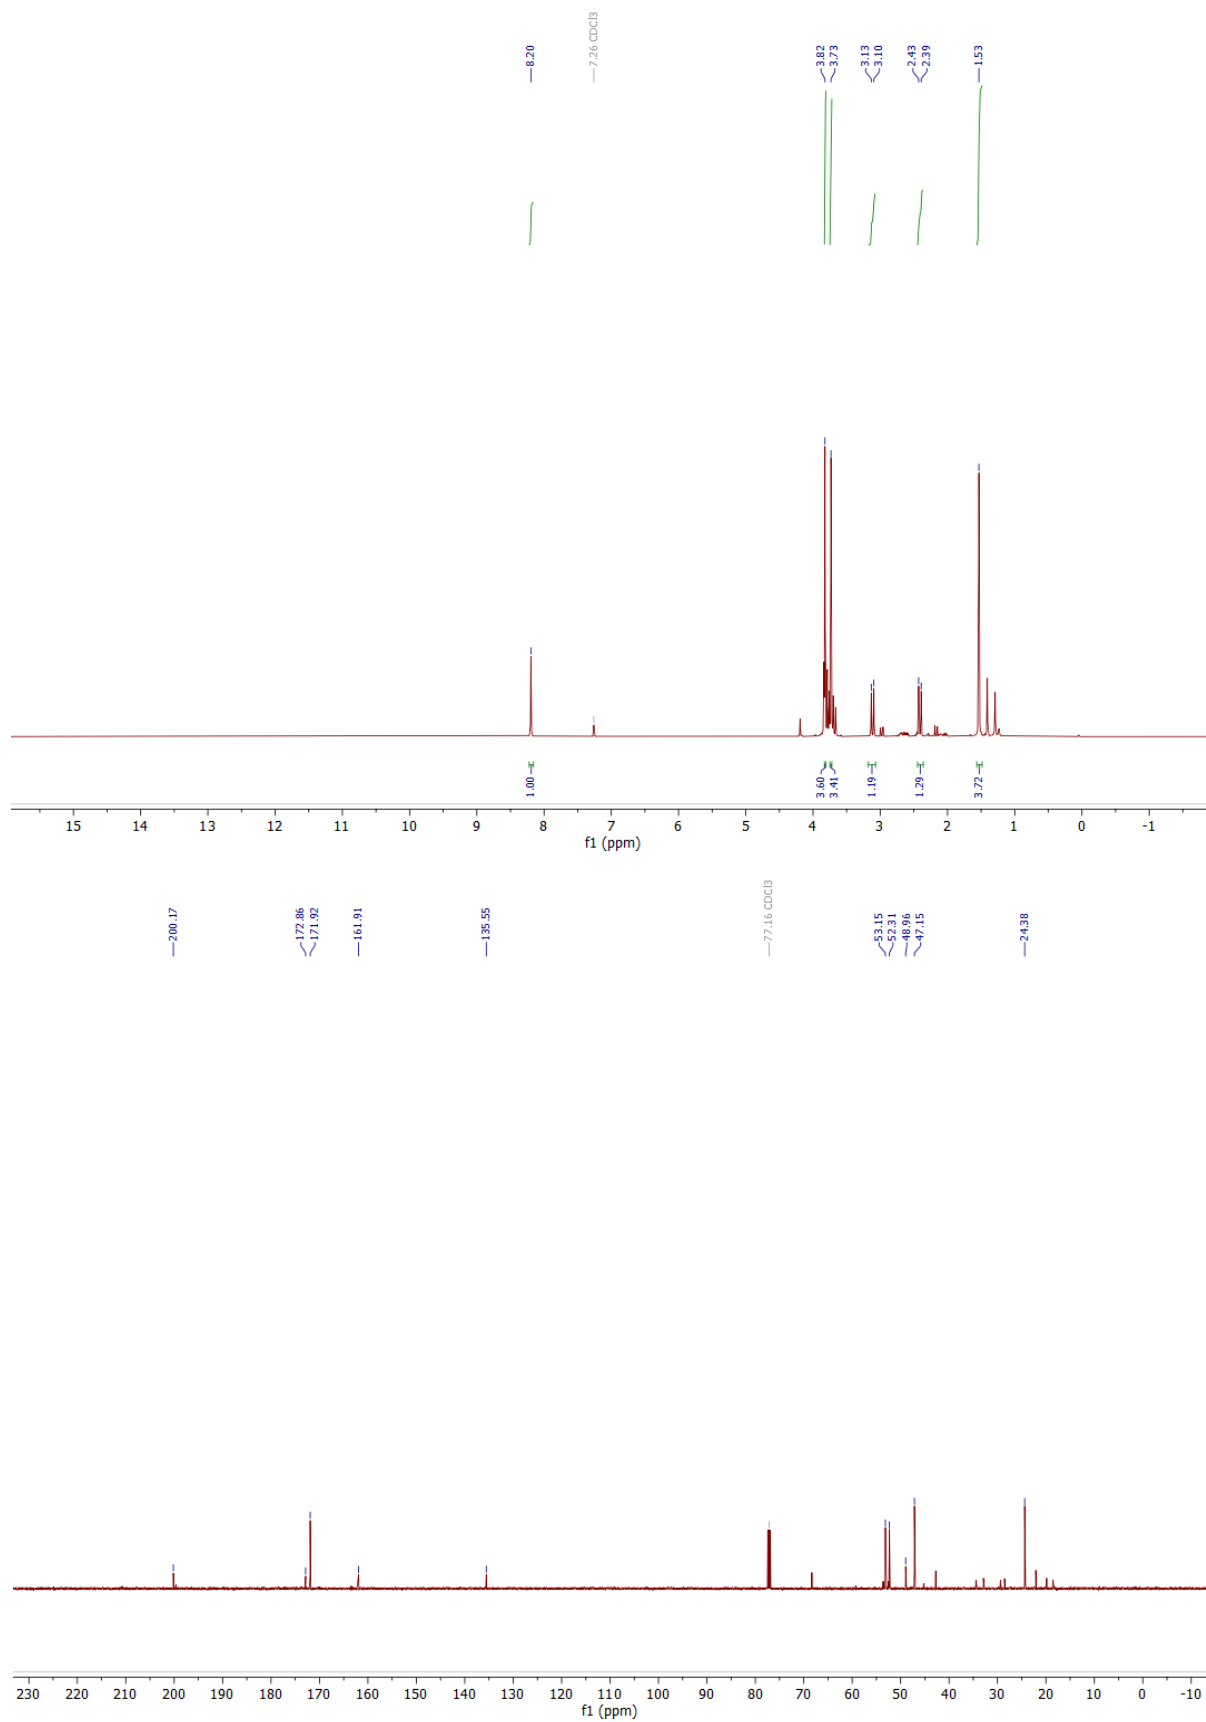

**Supplementary Fig. 23.** The <sup>1</sup>H-NMR (500 MHz) and <sup>13</sup>C-NMR (125 MHz) spectra of compound S14 in CDCl<sub>3</sub>

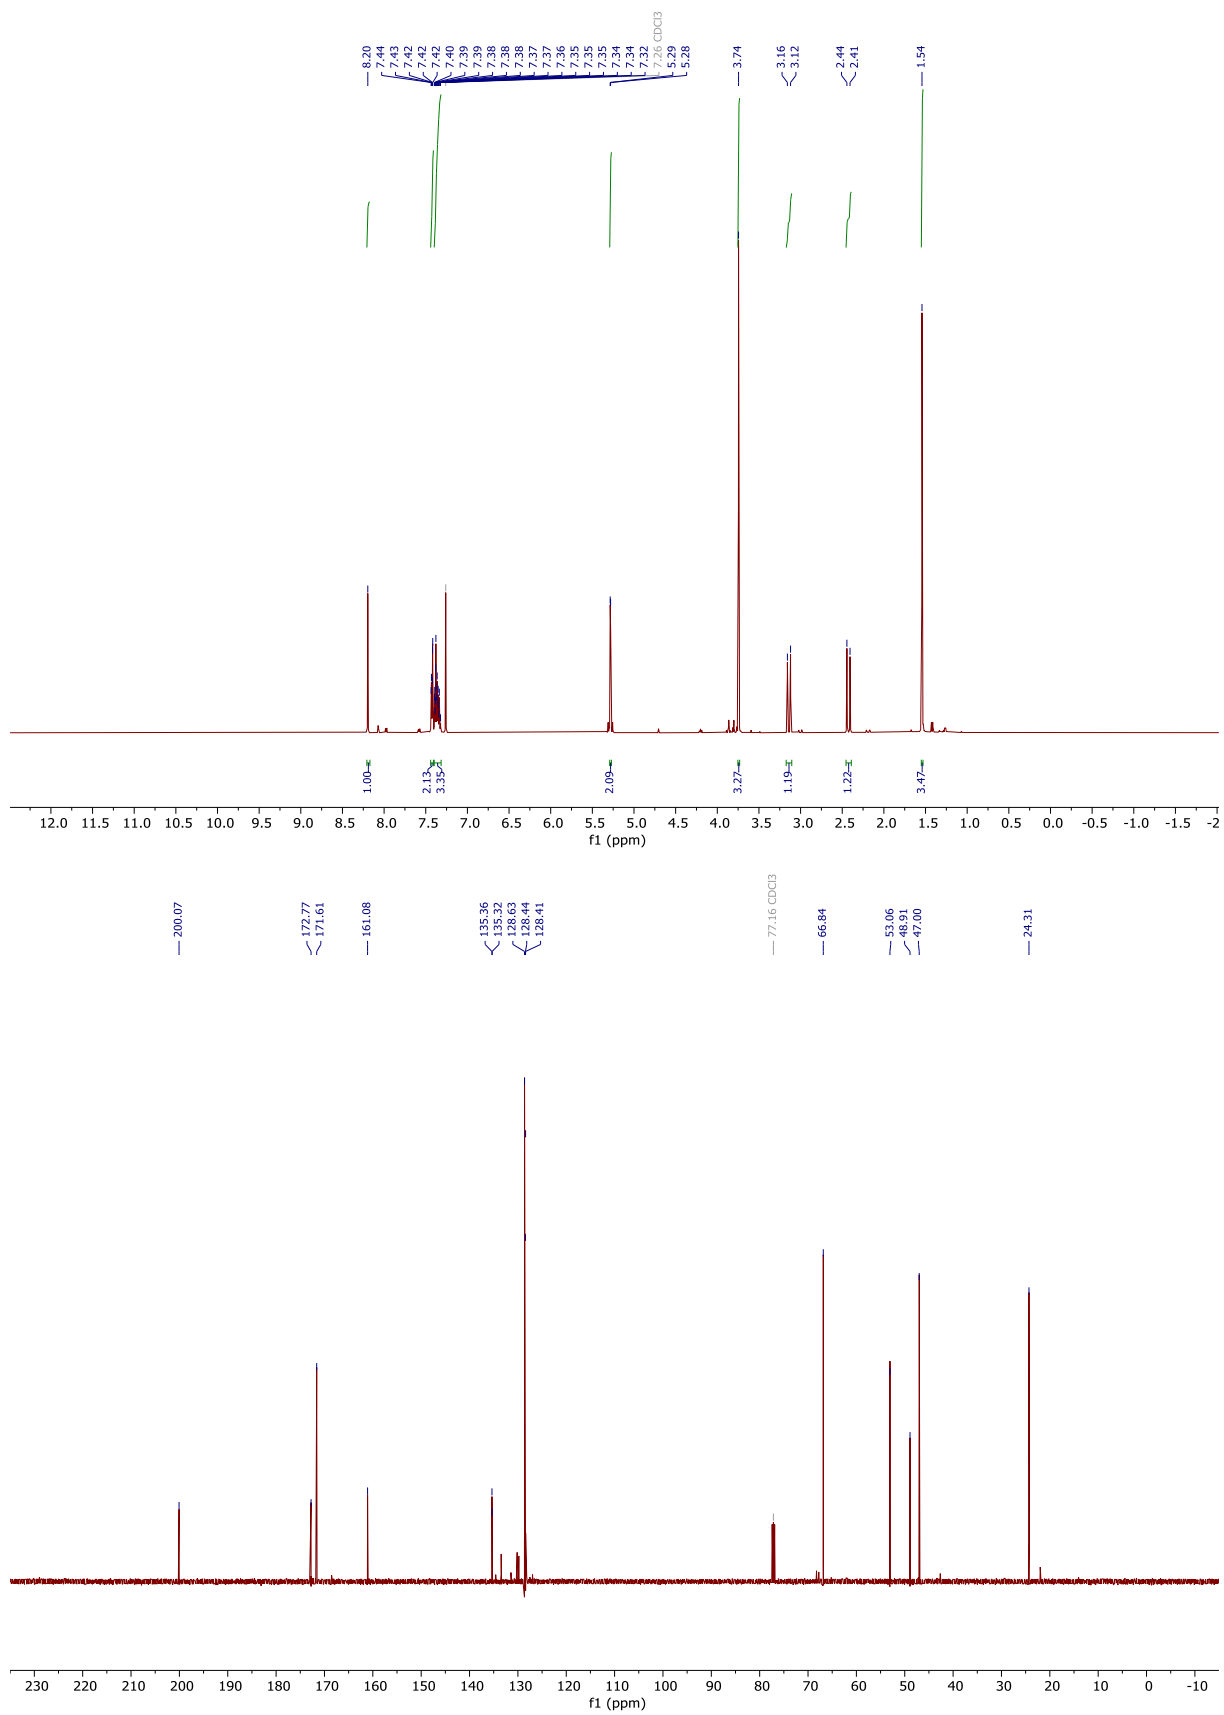

**Supplementary Fig. 24.** The <sup>1</sup>H-NMR (500 MHz) and <sup>13</sup>C-NMR (125 MHz) spectra of compound **S15** in CDCl<sub>3</sub>



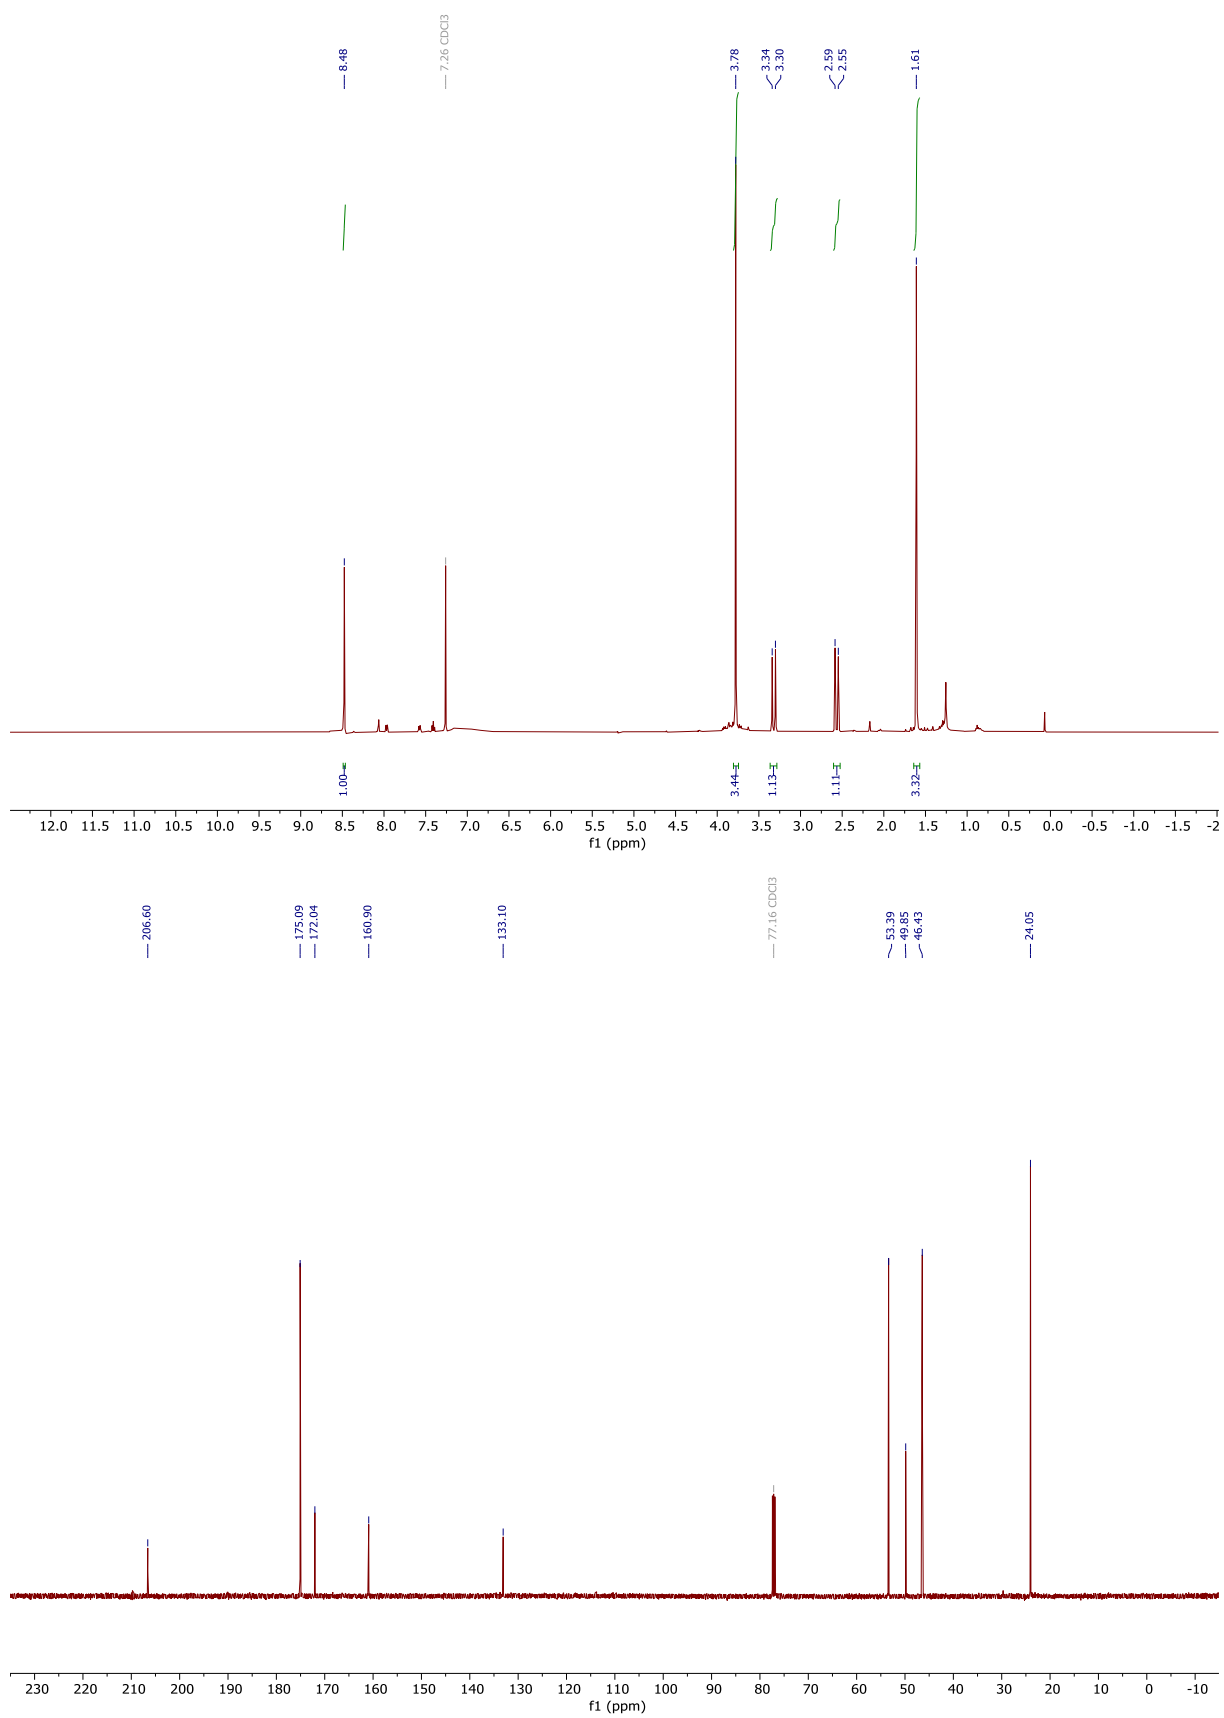

**Supplementary Fig. 25.** The <sup>1</sup>H-NMR (500 MHz) and <sup>13</sup>C-NMR (125 MHz) spectra of compound S16 in CDCl<sub>3</sub>

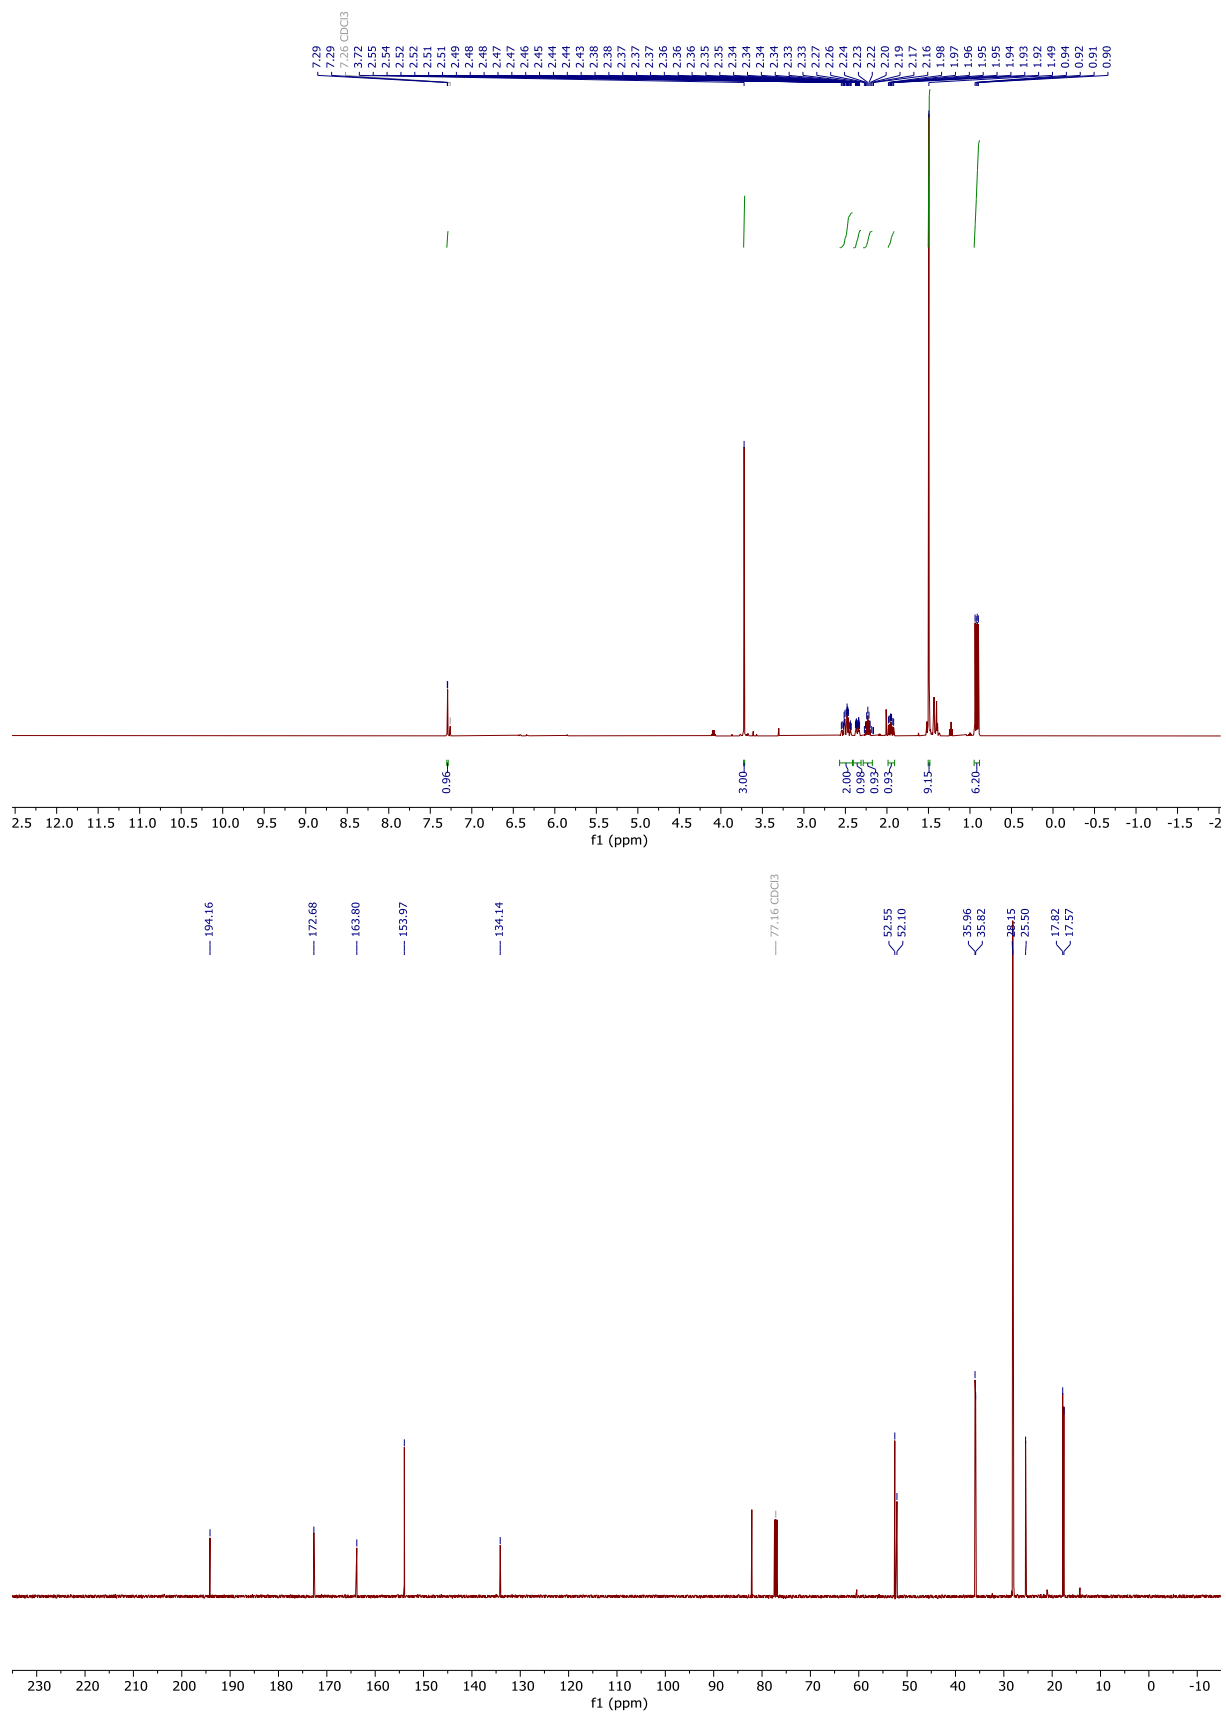

**Supplementary Fig. 26.** The <sup>1</sup>H-NMR (500 MHz) and <sup>13</sup>C-NMR (125 MHz) spectra of compound S17R/S17S in CDCl<sub>3</sub>

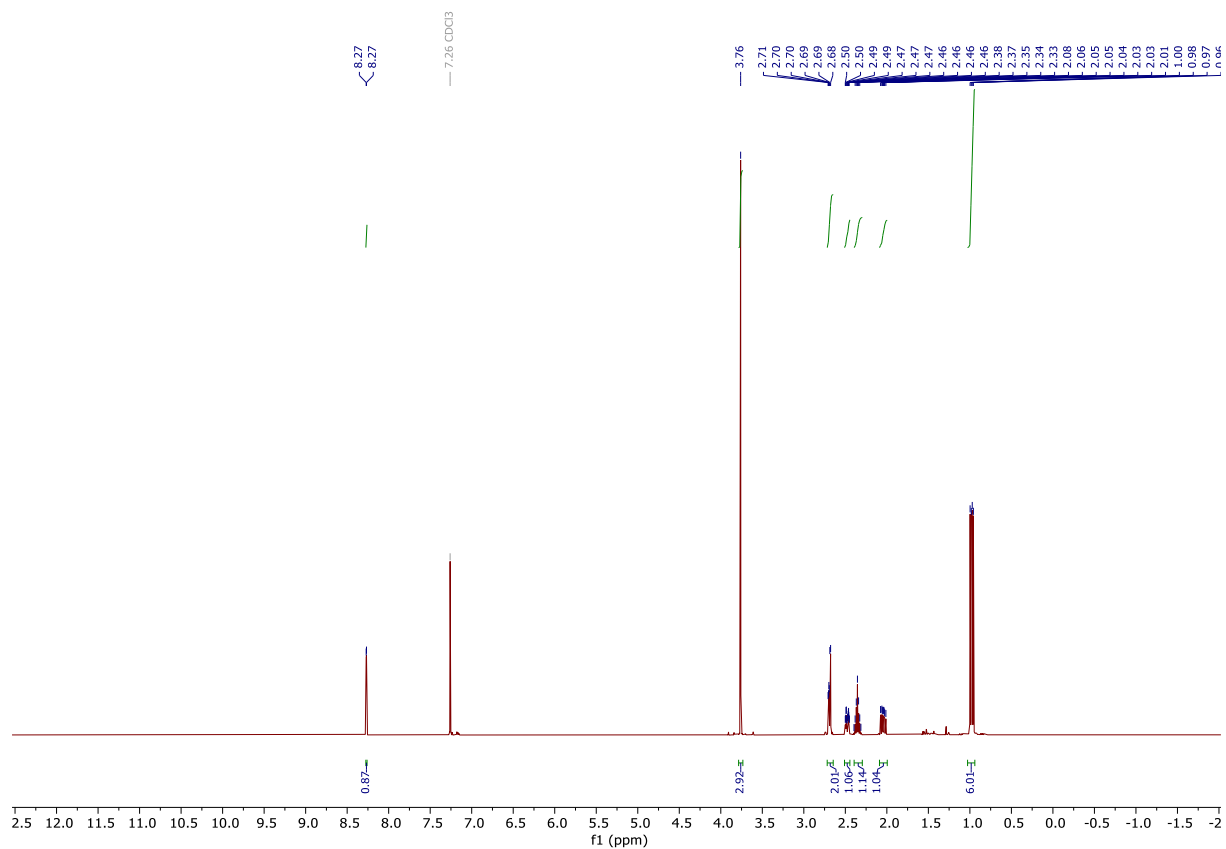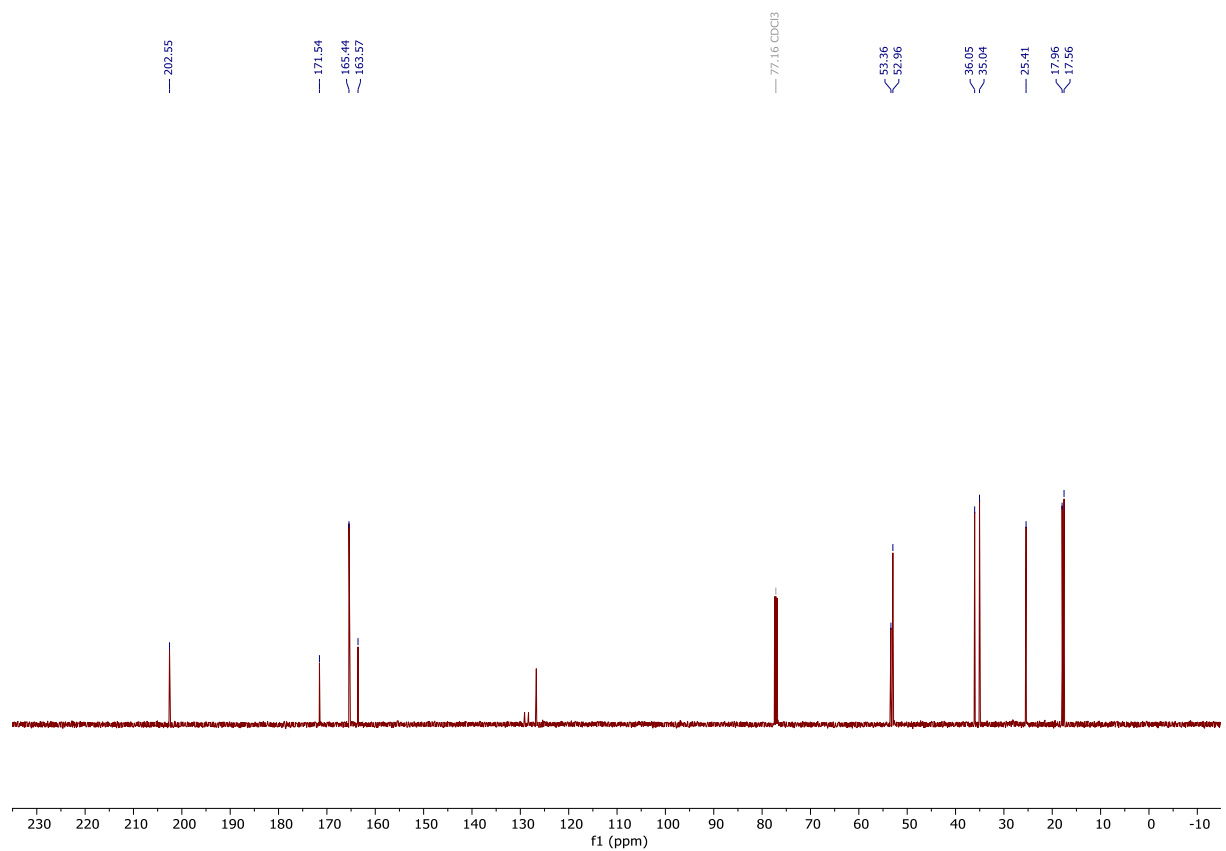

**Supplementary Fig. 27.** The  $^1\text{H}$ -NMR (500 MHz) and  $^{13}\text{C}$ -NMR (125 MHz) spectra of compound **S18R/S18S** in  $\text{CDCl}_3$

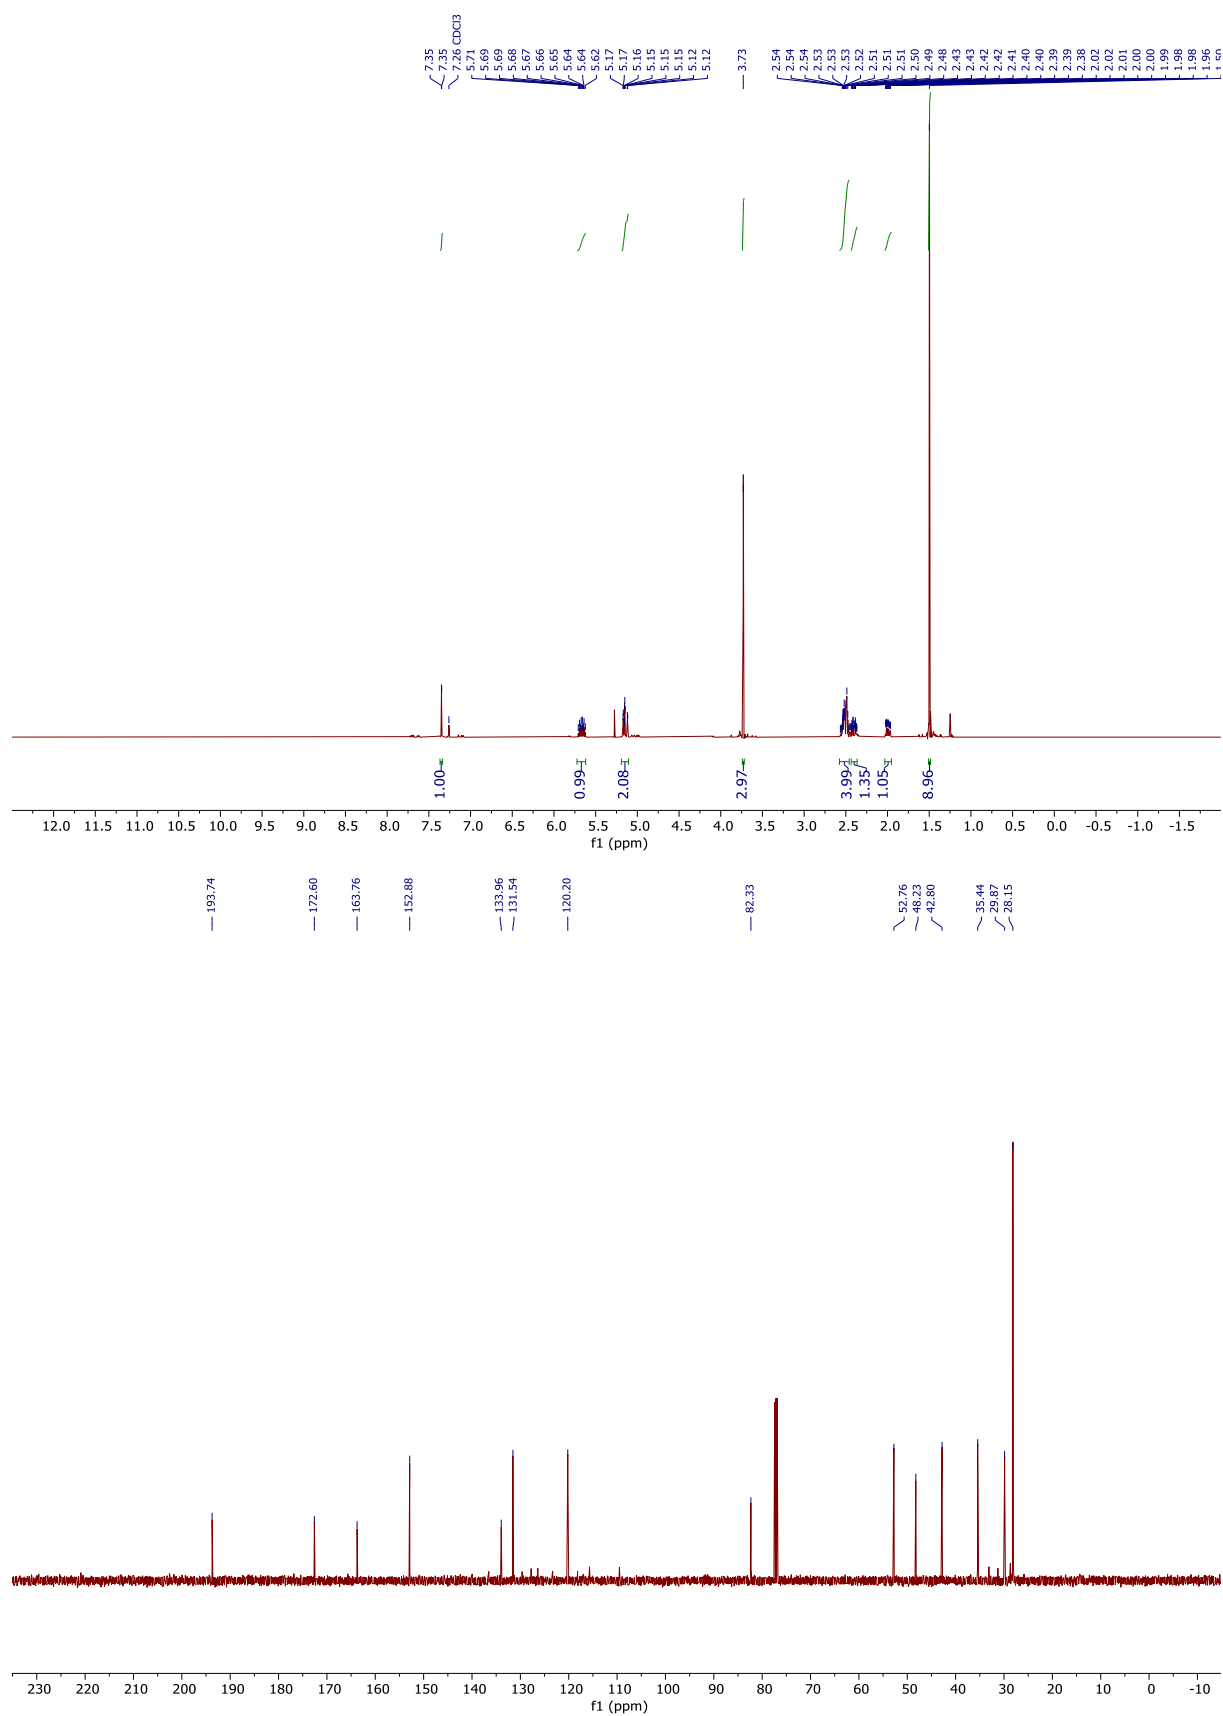

**Supplementary Fig. 28.** The <sup>1</sup>H-NMR (500 MHz) and <sup>13</sup>C-NMR (125 MHz) spectra of compound **S19R/S19S** in CDCl<sub>3</sub>

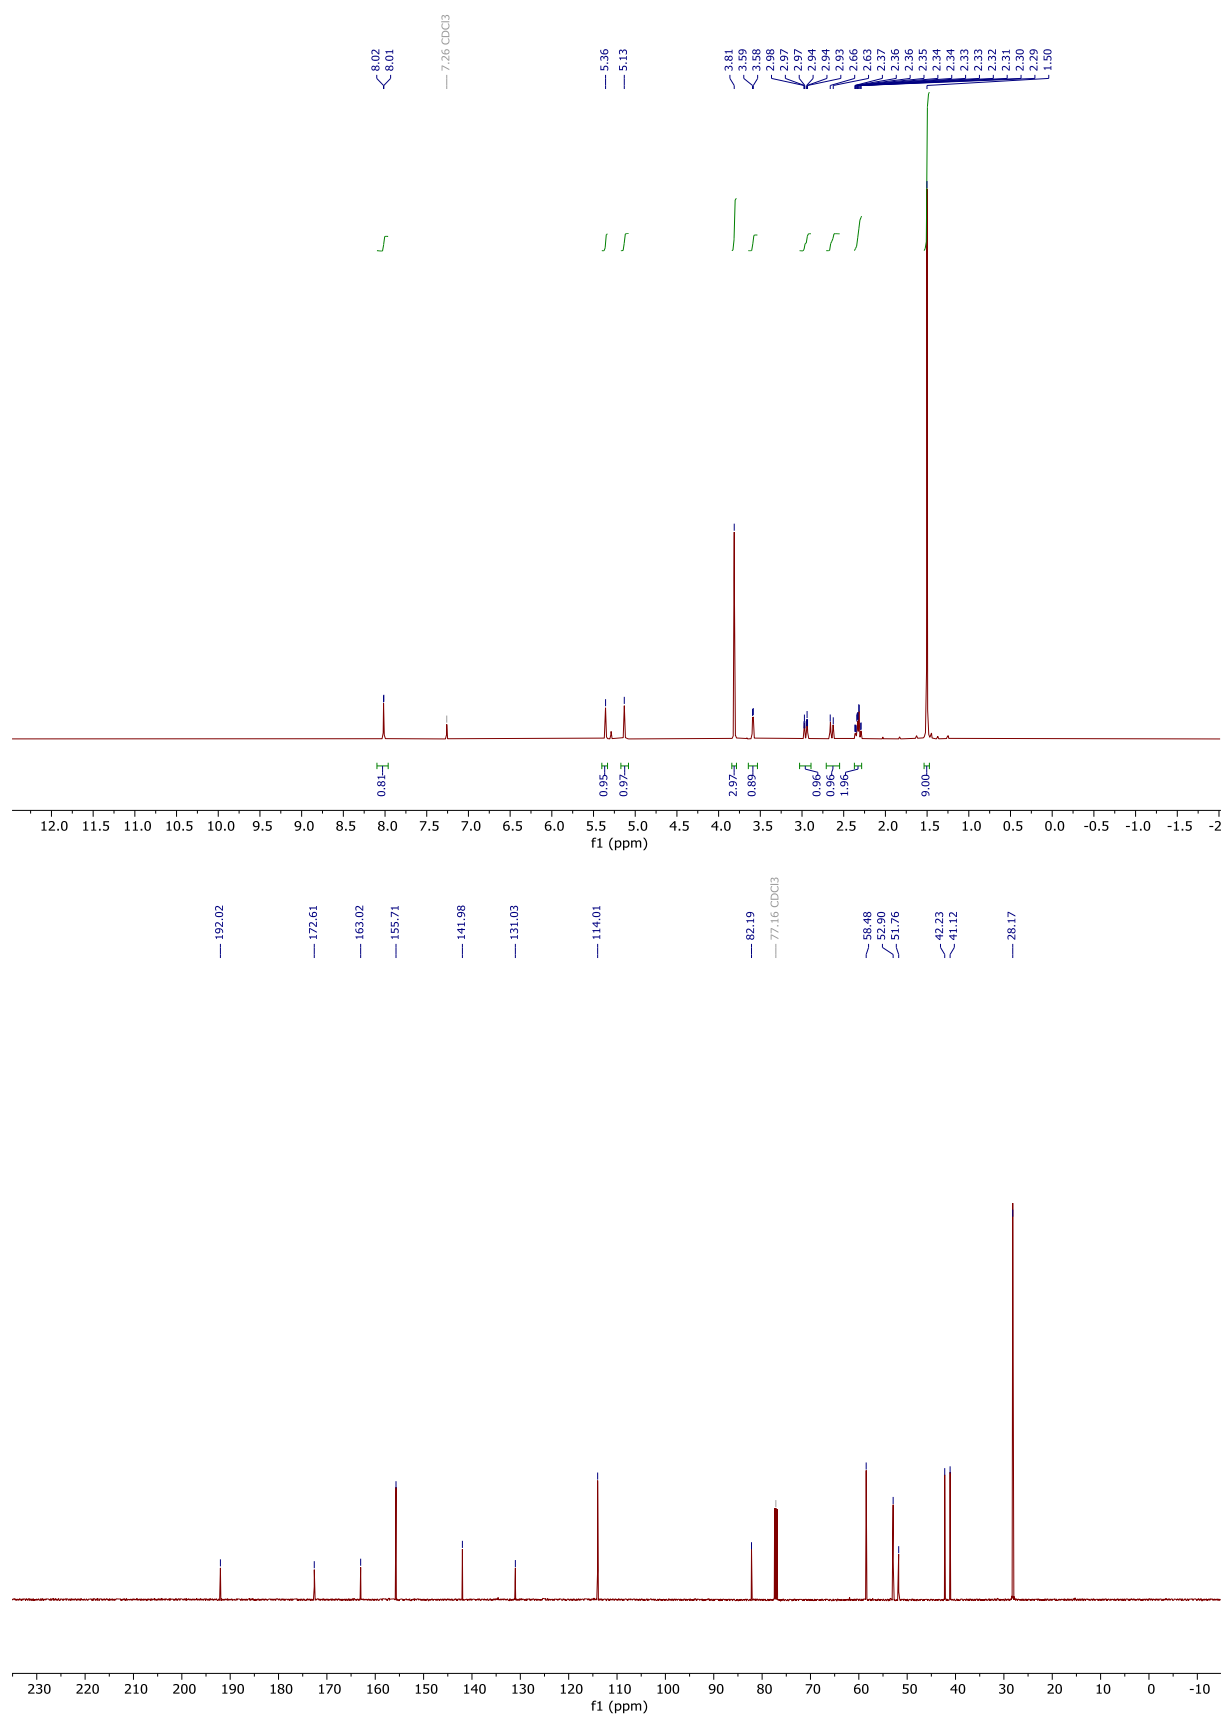

**Supplementary Fig. 29.** The <sup>1</sup>H-NMR (500 MHz) and APT-NMR (125 MHz) spectra of compound **S20R,R/S20S,S** in CDCl<sub>3</sub>

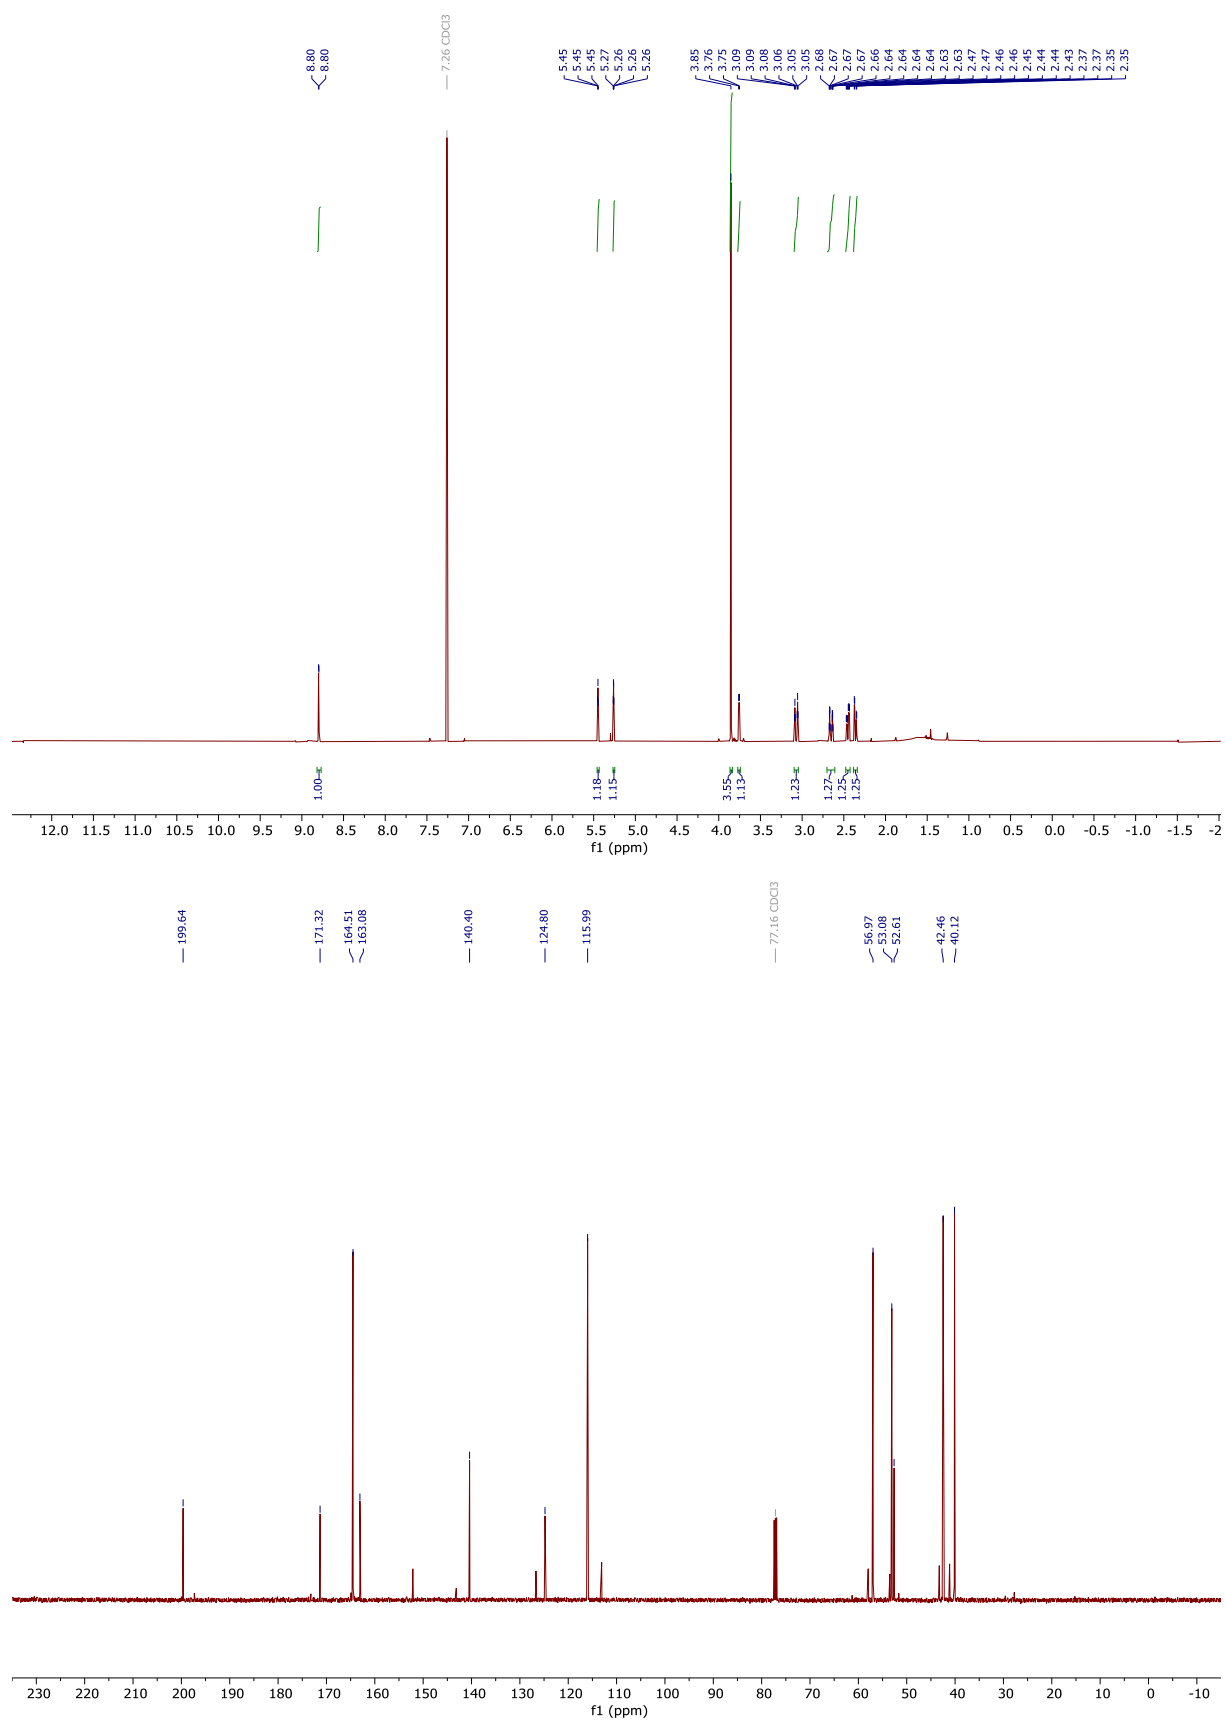

**Supplementary Fig. 30.** The <sup>1</sup>H-NMR (500 MHz) and APT-NMR (125 MHz) spectra of compound **S21R,R/S21S,S** in CDCl<sub>3</sub>

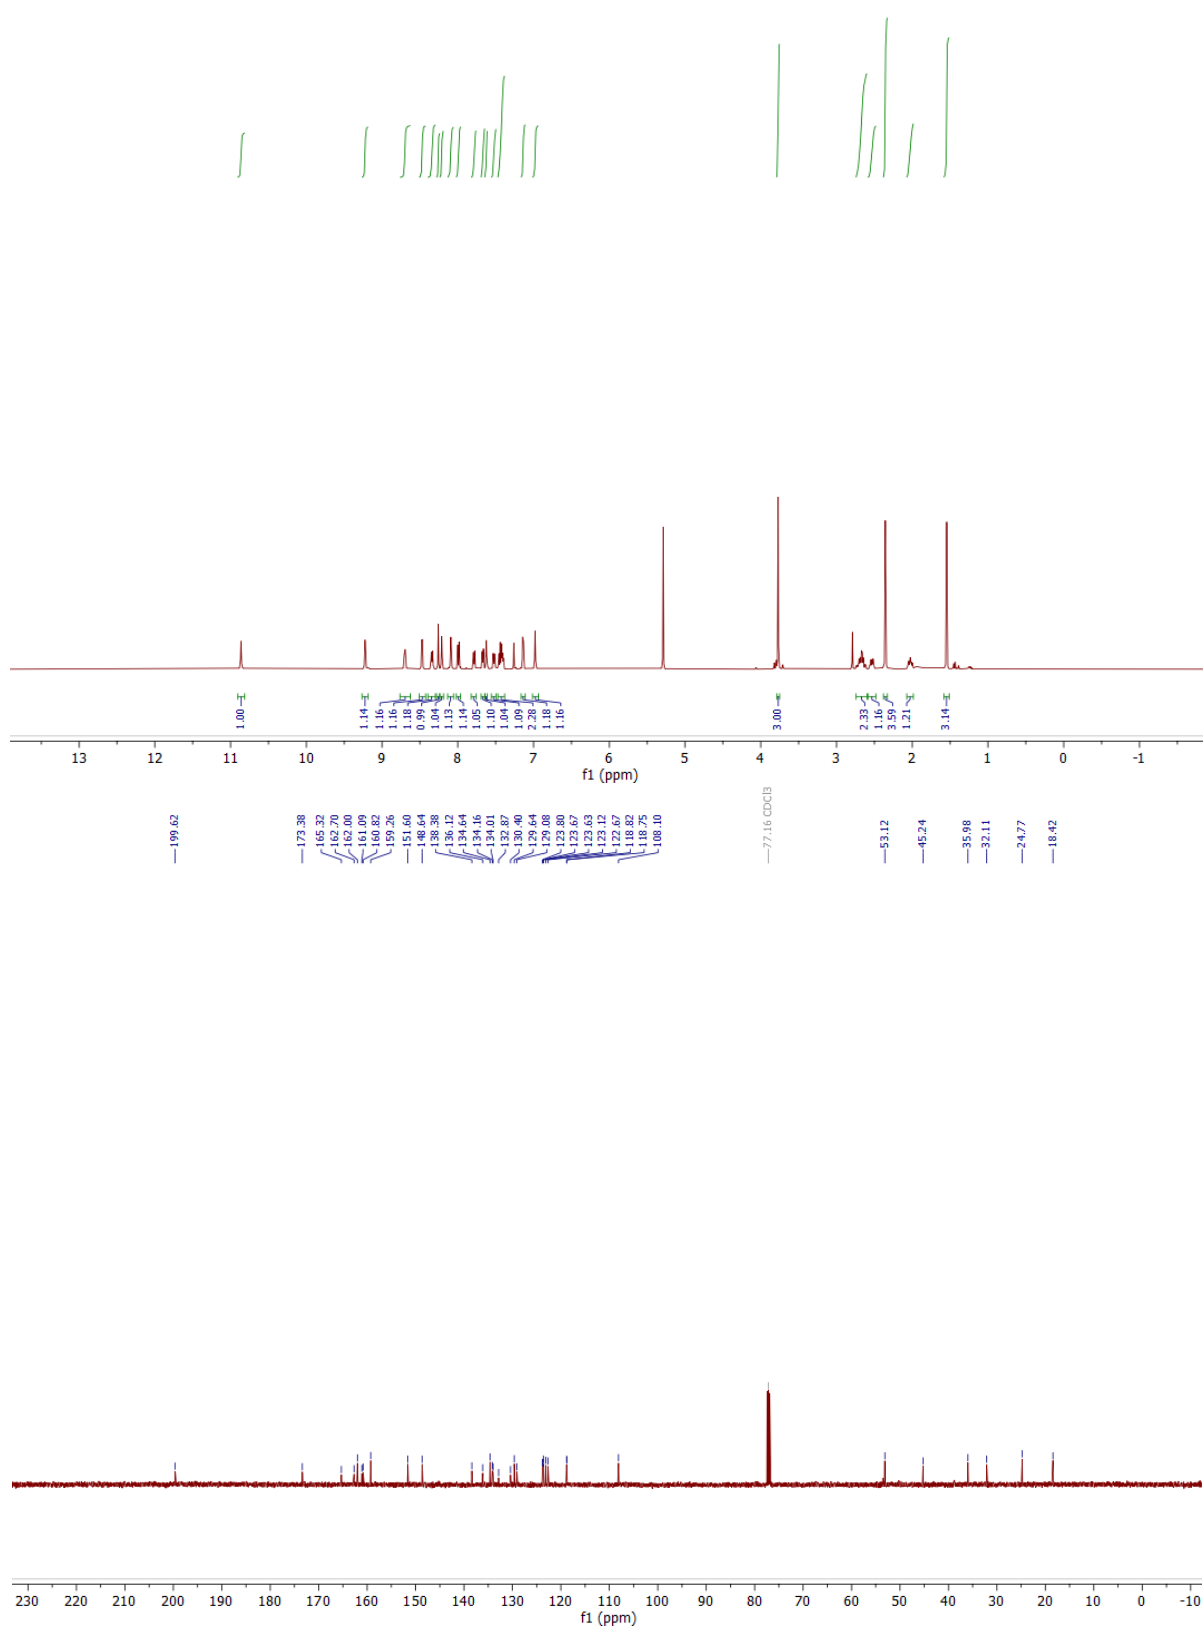

**Supplementary Fig. 31.** The <sup>1</sup>H-NMR (500 MHz) and <sup>13</sup>C-NMR (125 MHz) spectra of compound **1aR-IN-8/1aS-IN-8** in CDCl<sub>3</sub>

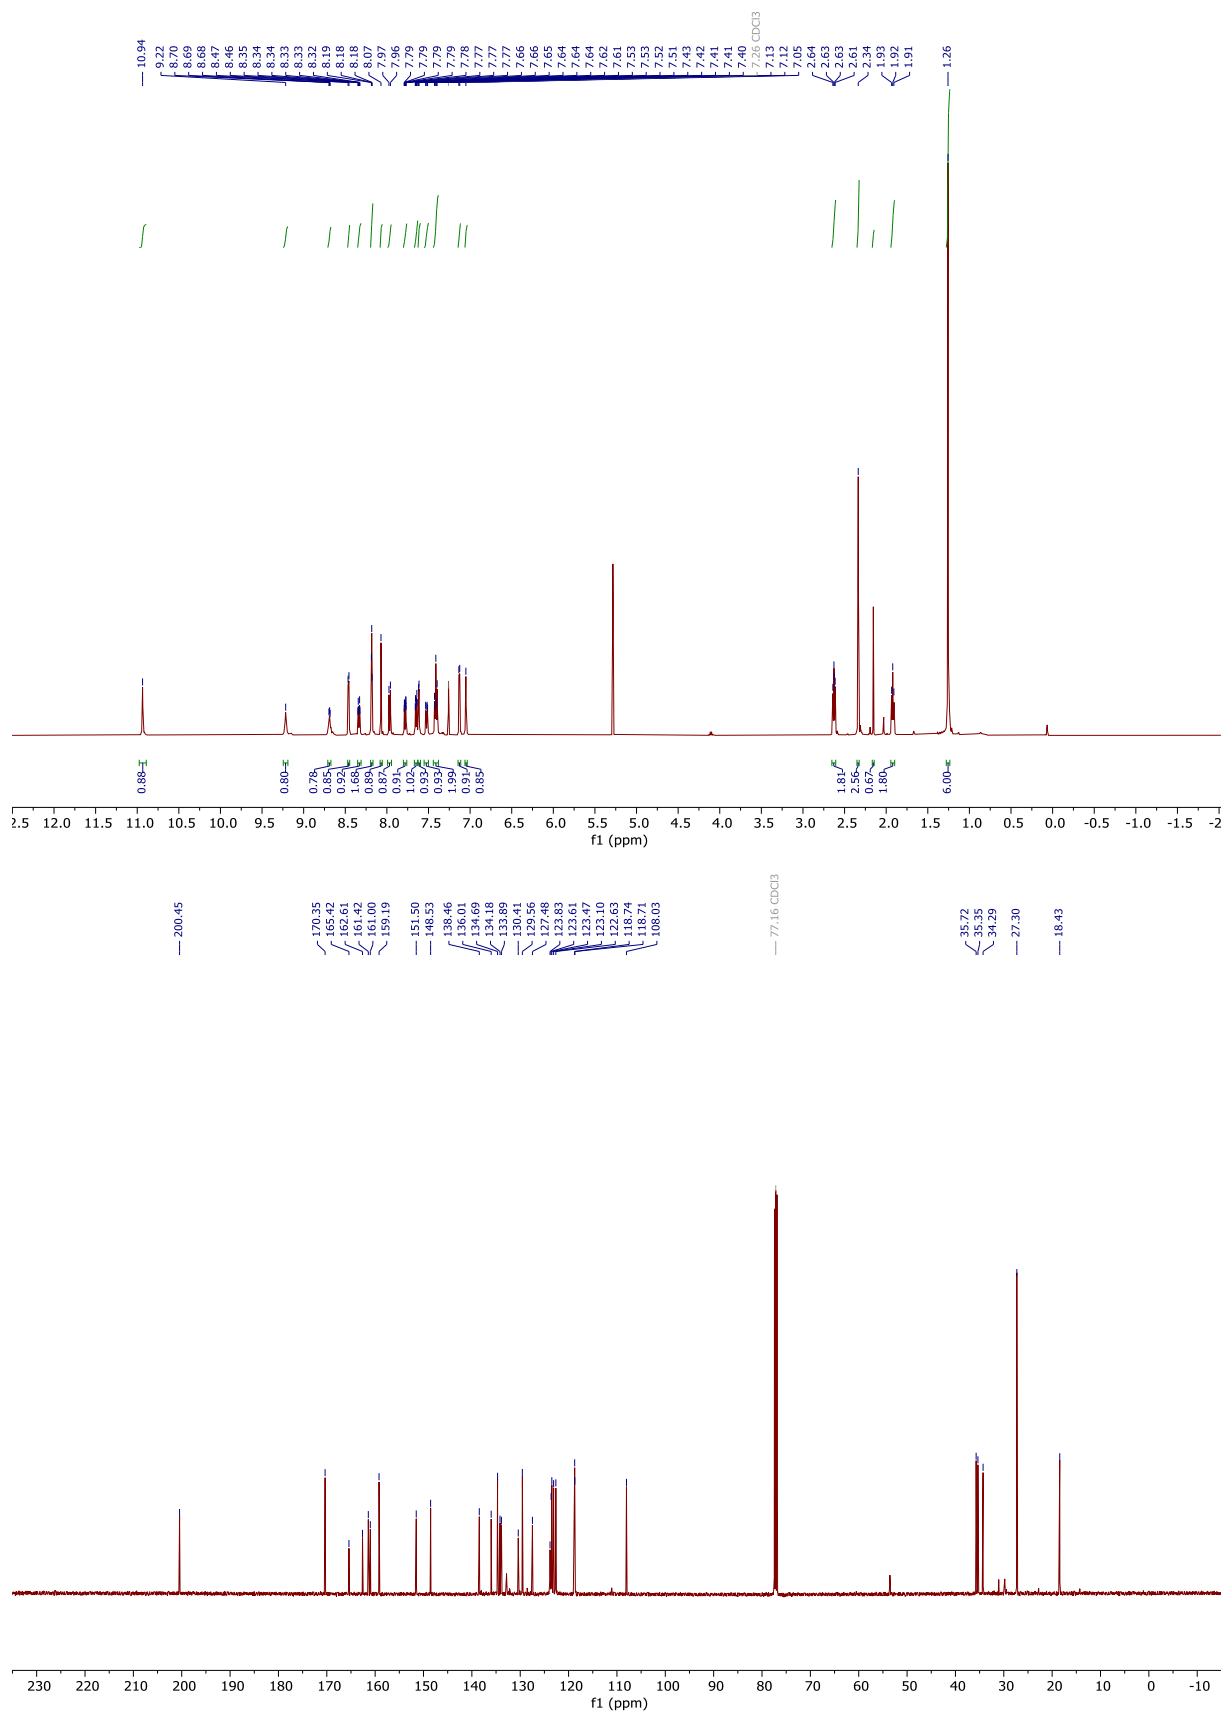

**Supplementary Fig. 32.** The <sup>1</sup>H-NMR (500 MHz) and <sup>13</sup>C-NMR (125 MHz) spectra of compound **2-IN-8** in CDCl<sub>3</sub>



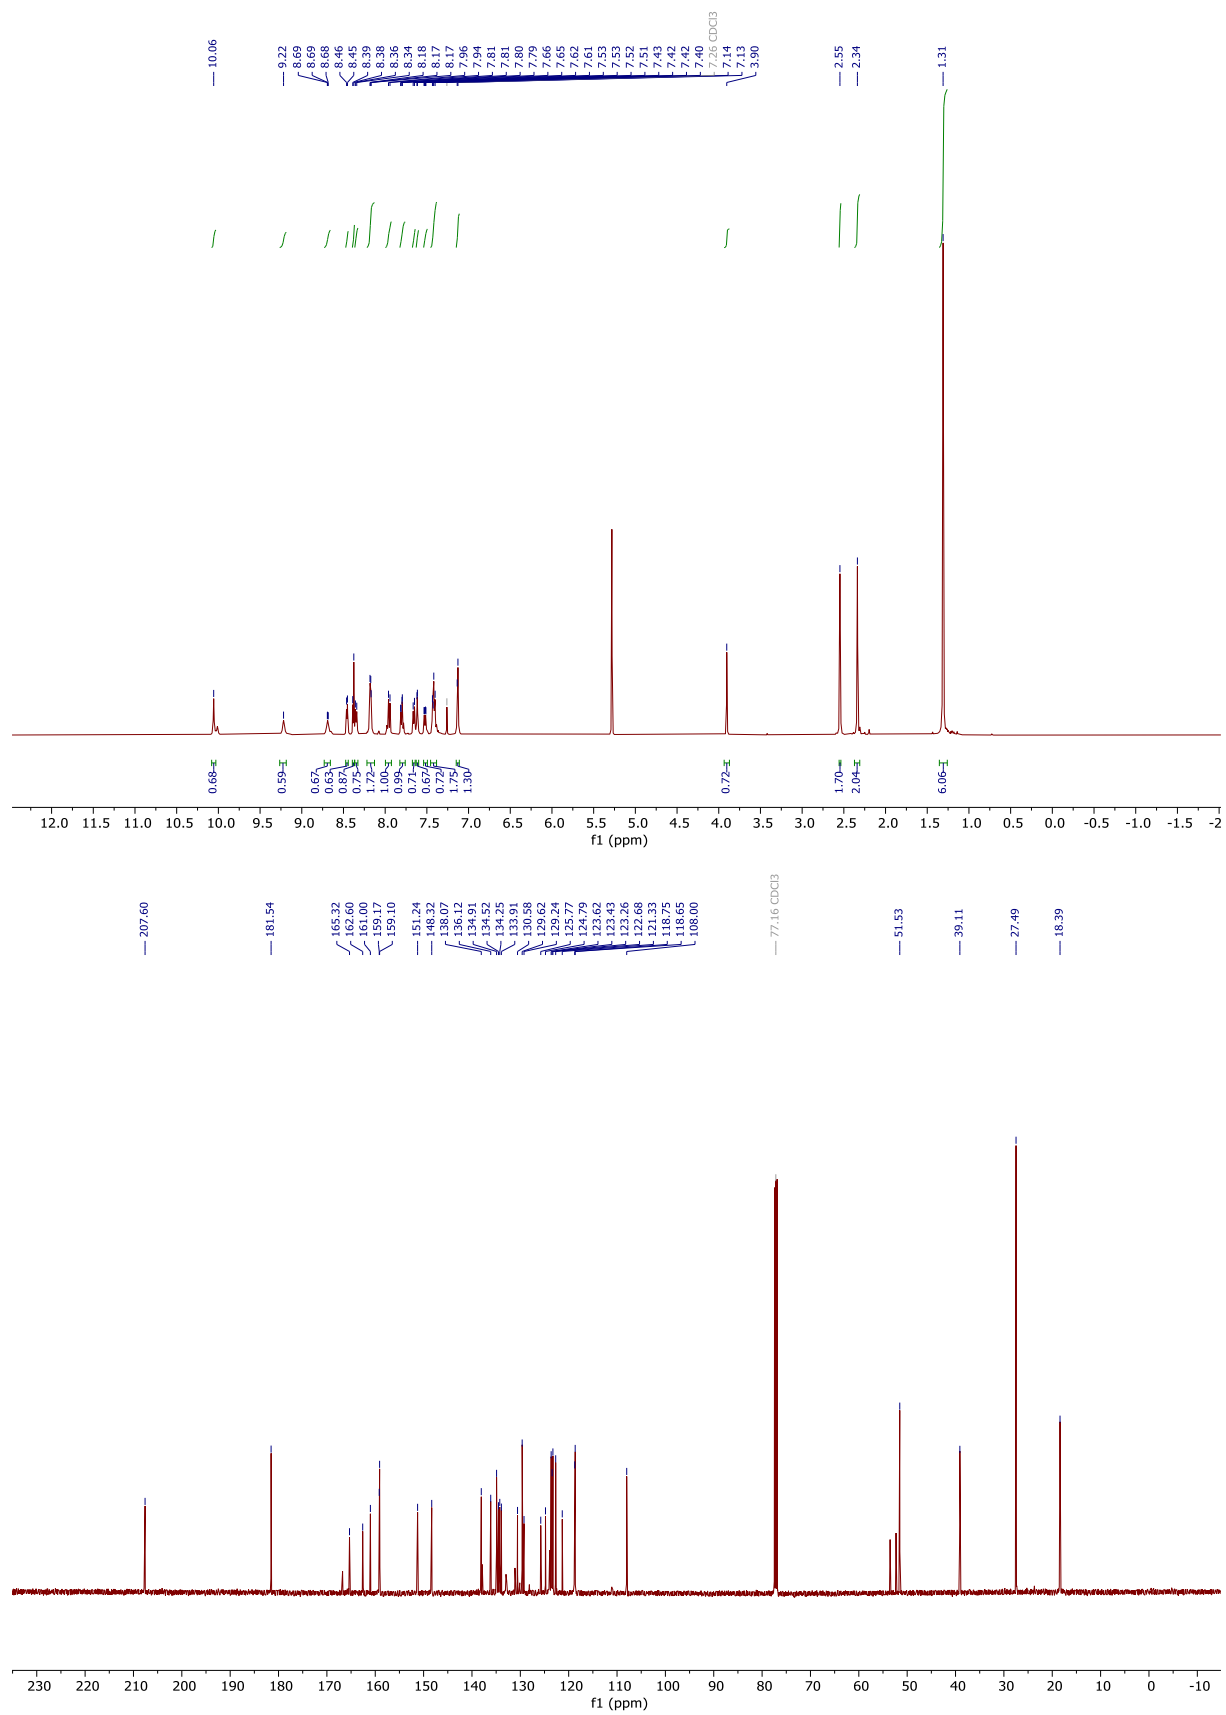

**Supplementary Fig. 33.** The  $^1\text{H-NMR}$  (500 MHz) and APT-NMR (125 MHz) spectra of compound **3-IN-8** in  $\text{CDCl}_3$

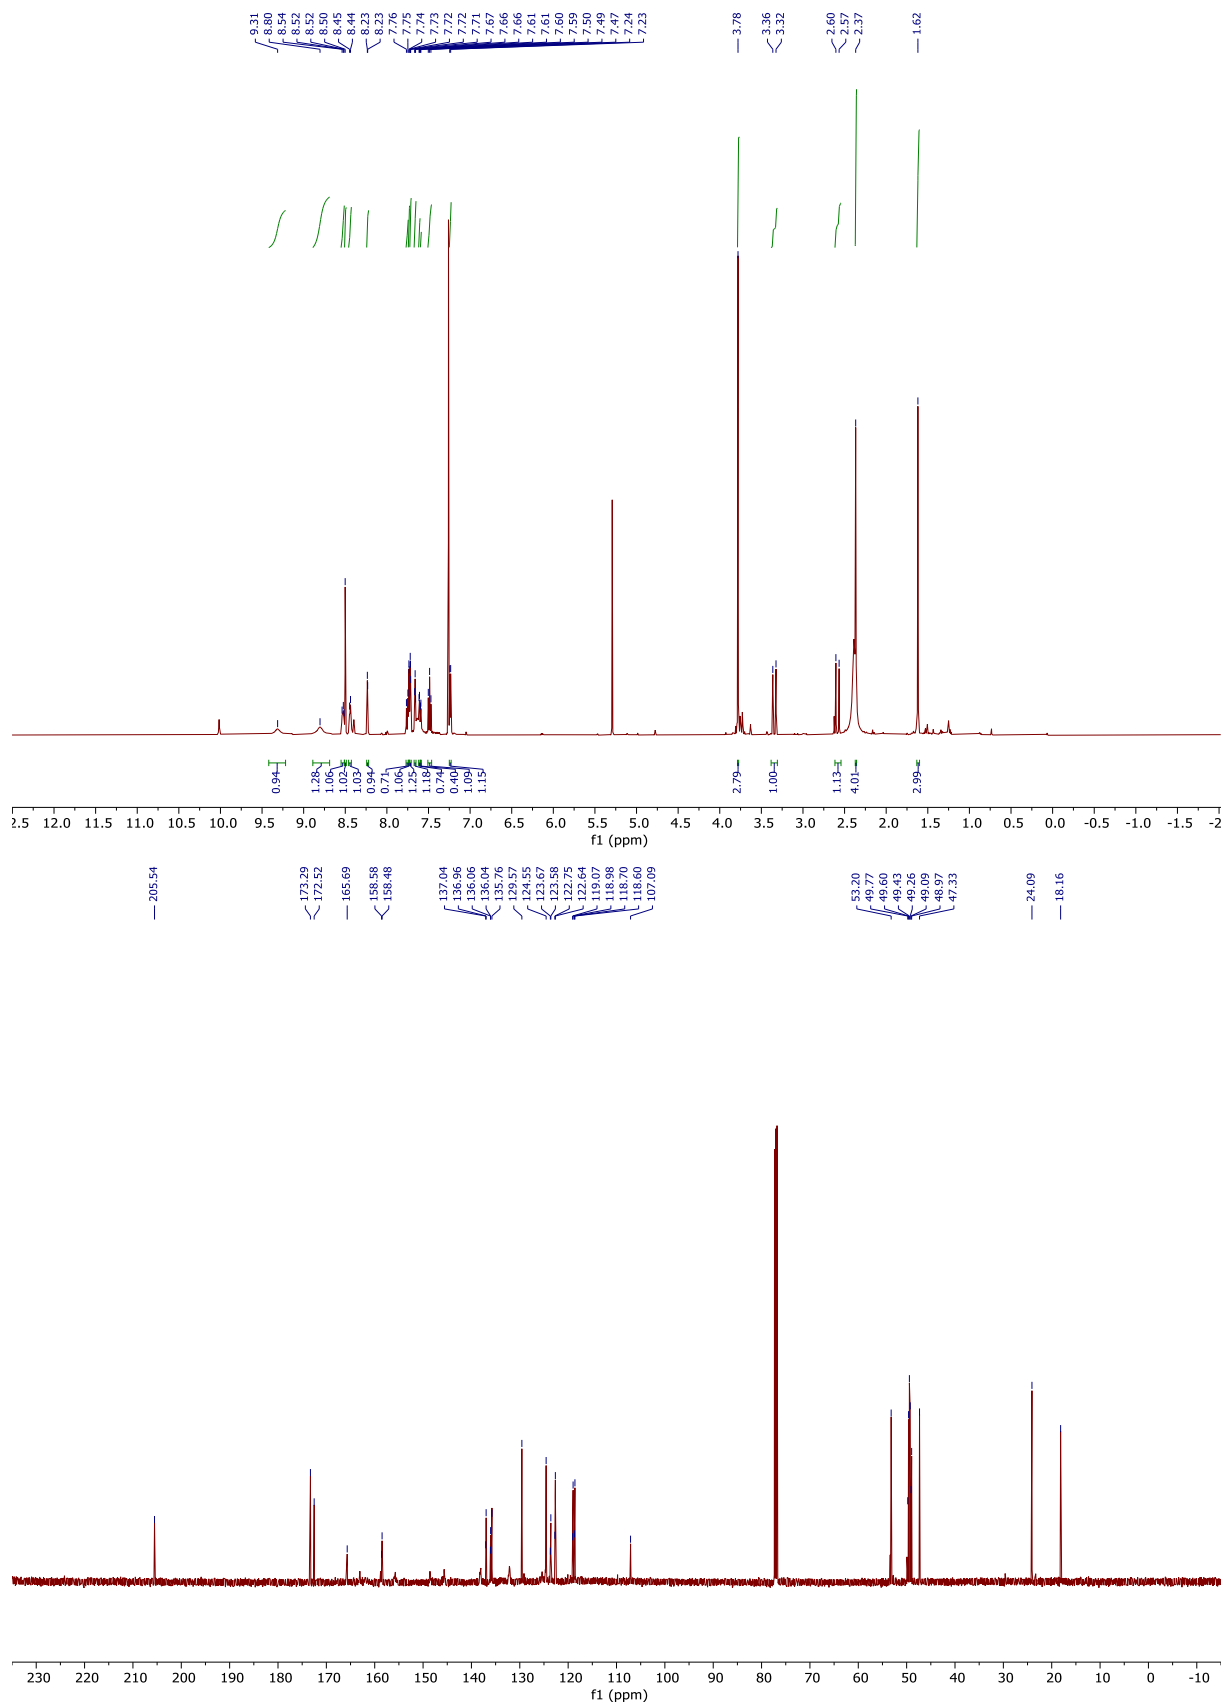

**Supplementary Fig. 34.** The <sup>1</sup>H-NMR (500 MHz) and <sup>13</sup>C-NMR (125 MHz) spectra of compound **4-IN-8** in CDCl<sub>3</sub>

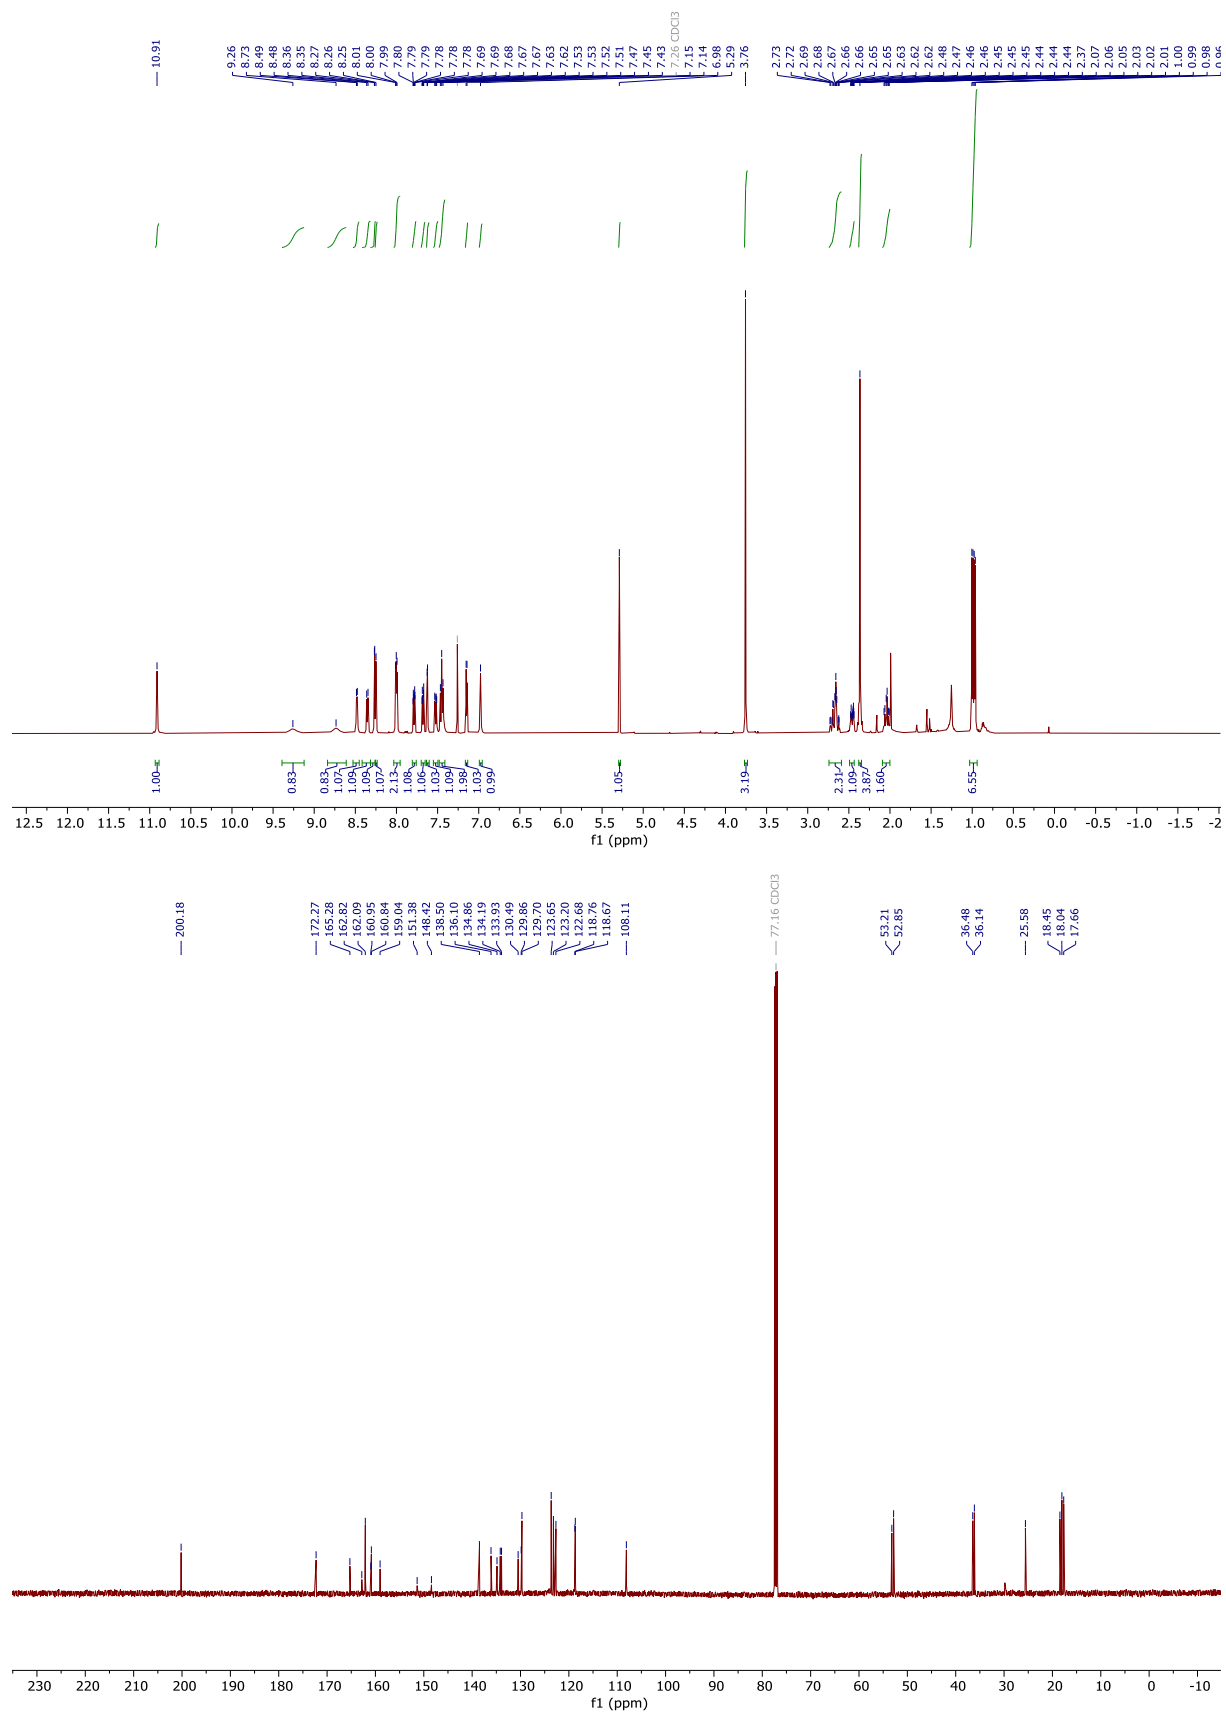

**Supplementary Fig. 35.** The <sup>1</sup>H-NMR (500 MHz) and <sup>13</sup>C-NMR (125 MHz) spectra of compound **5R-IN-8/5S-IN-8** in CDCl<sub>3</sub>

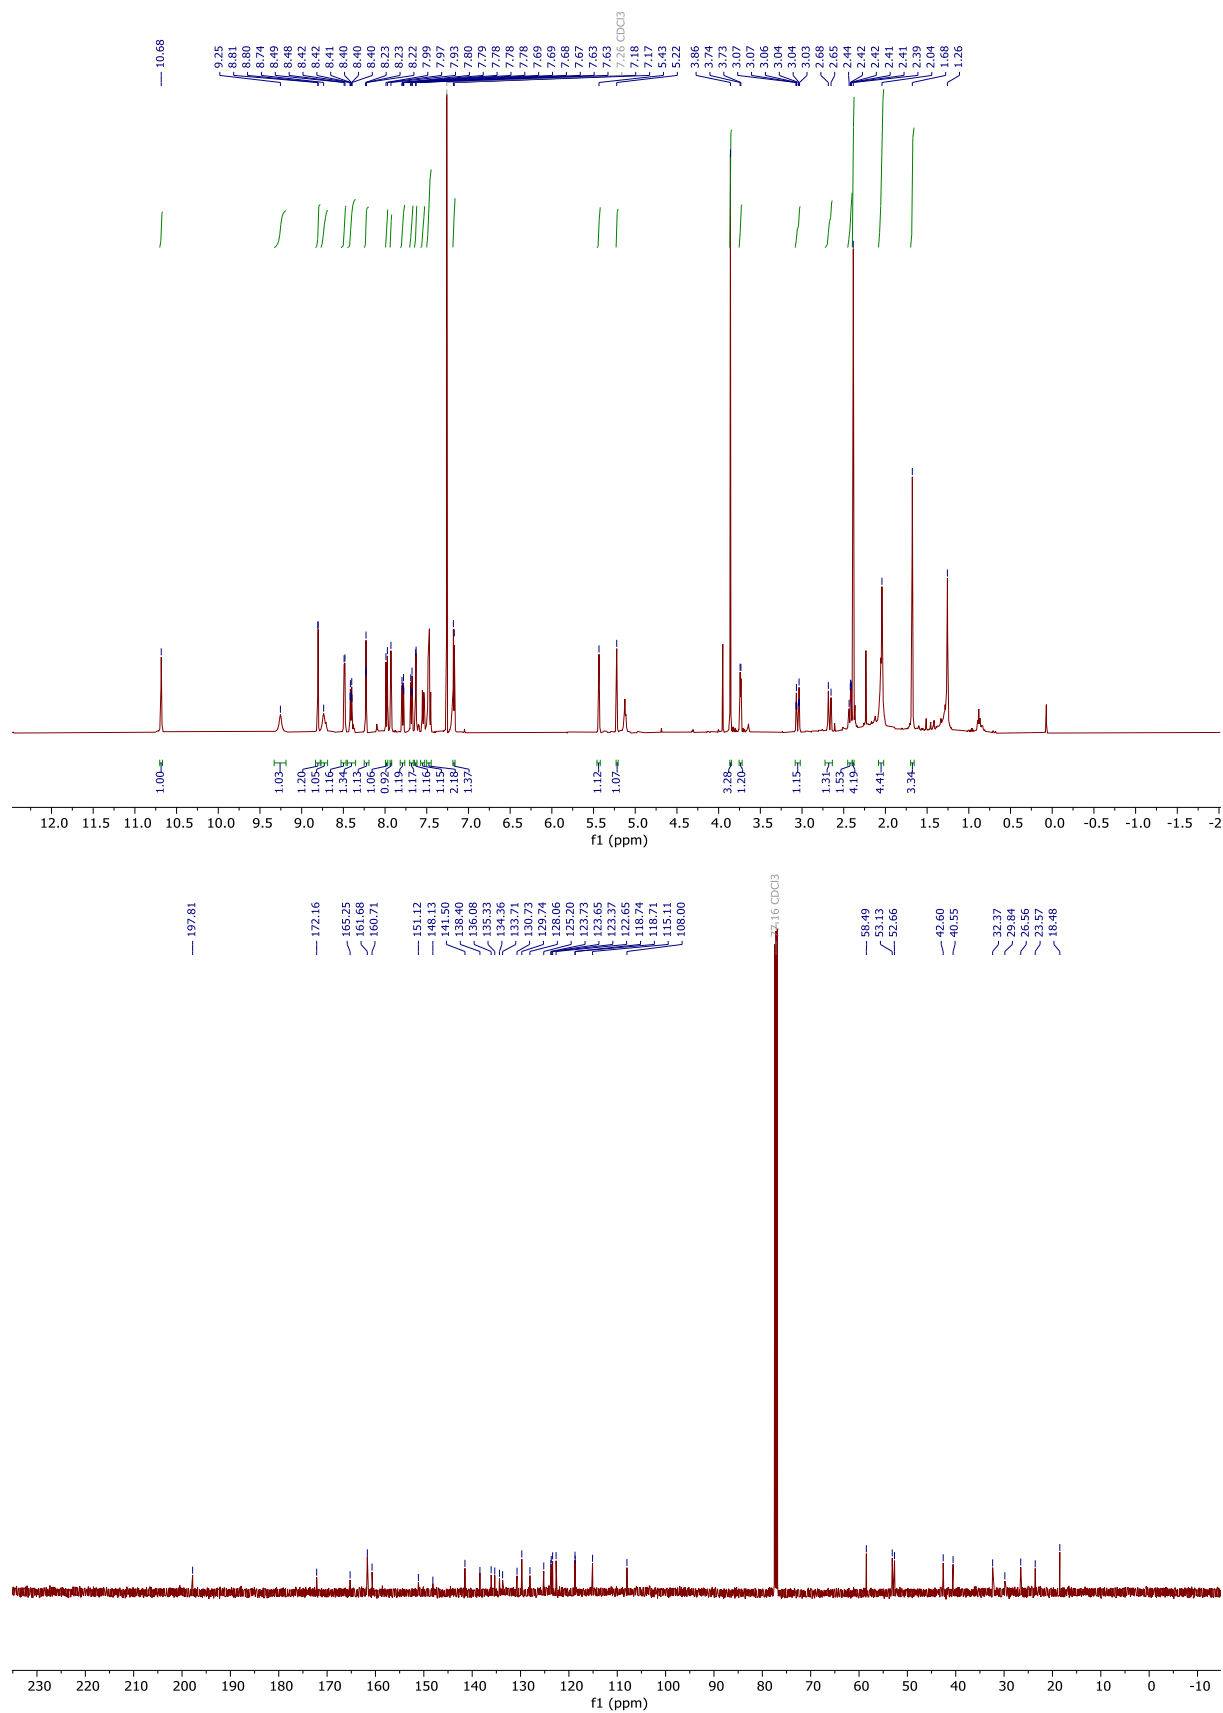

**Supplementary Fig. 36.** The <sup>1</sup>H-NMR (500 MHz) and APT-NMR (125 MHz) spectra of compound 6S,S-IN-8/6R,R-IN-8 in CDCl<sub>3</sub>

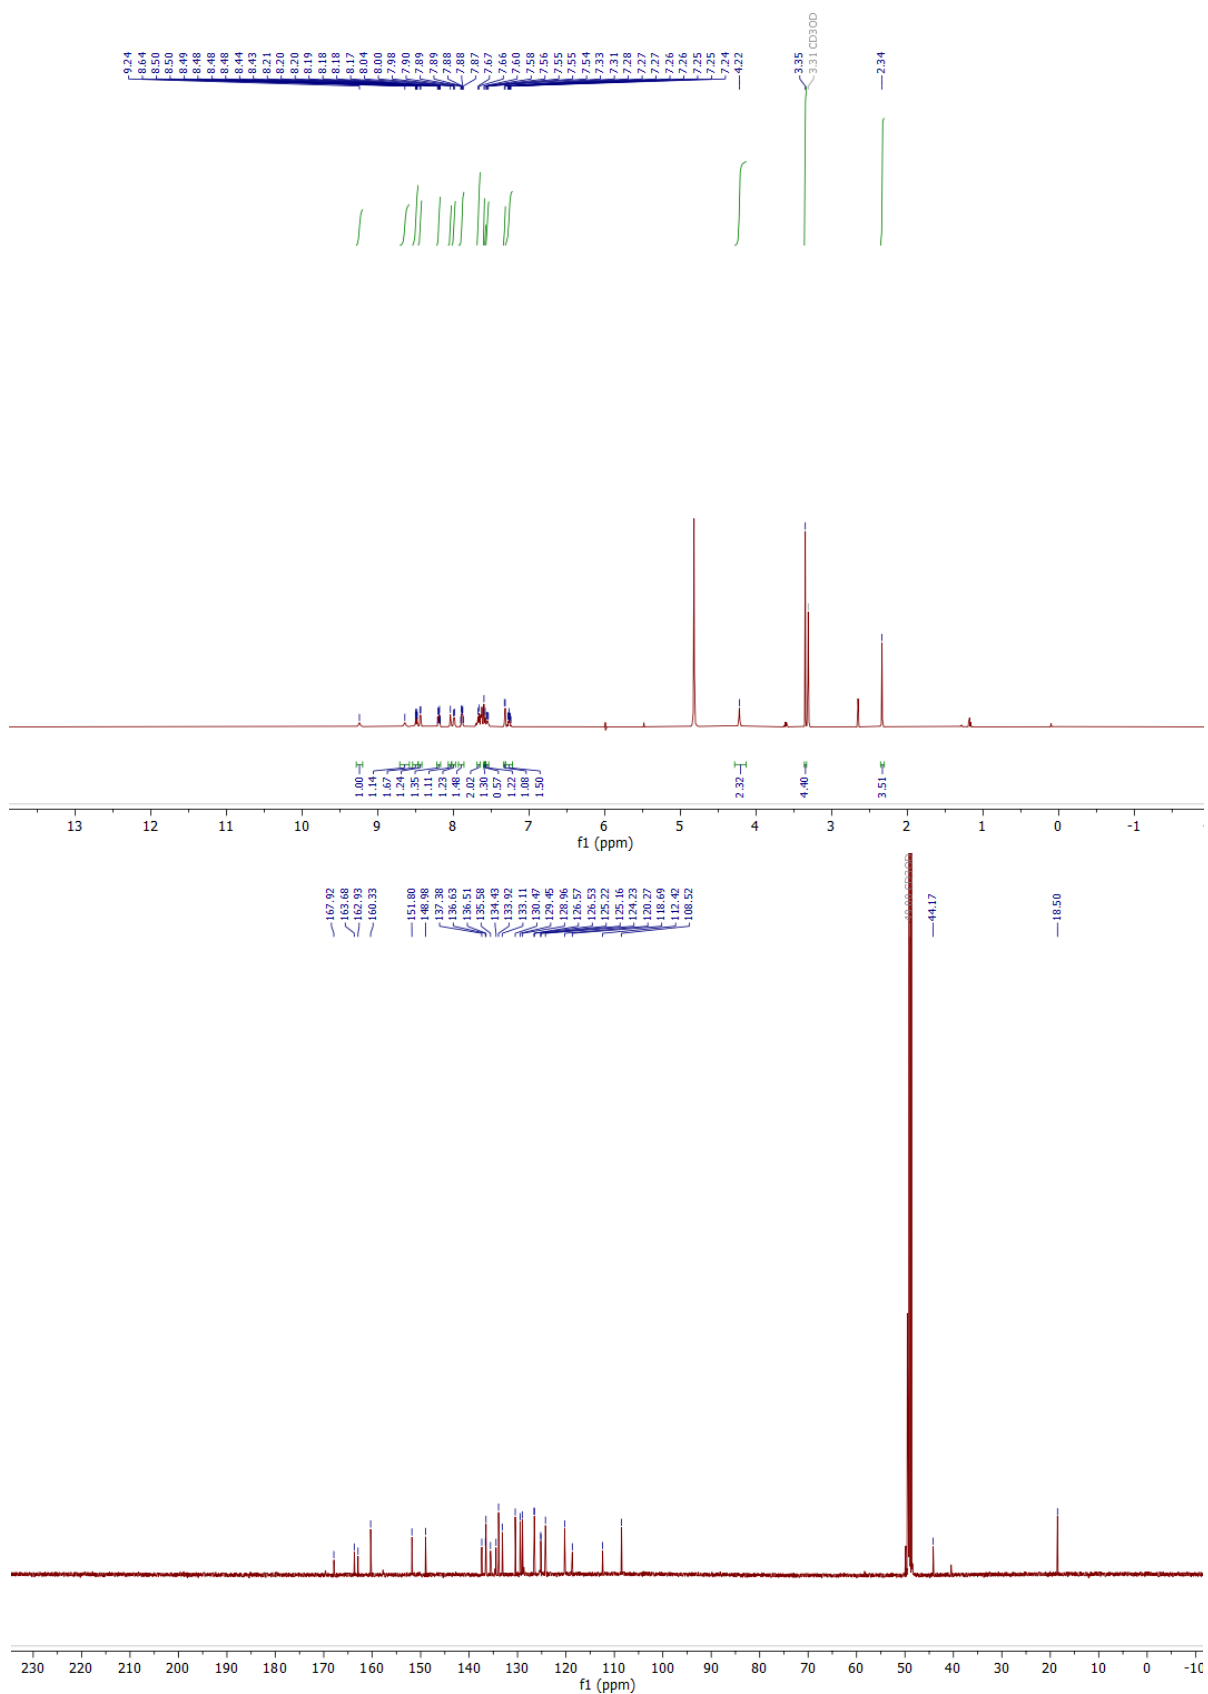

**Supplementary Fig. 37.** The <sup>1</sup>H-NMR (500 MHz) and <sup>13</sup>C-NMR (125 MHz) spectra of compound **S26** in CD<sub>3</sub>OD



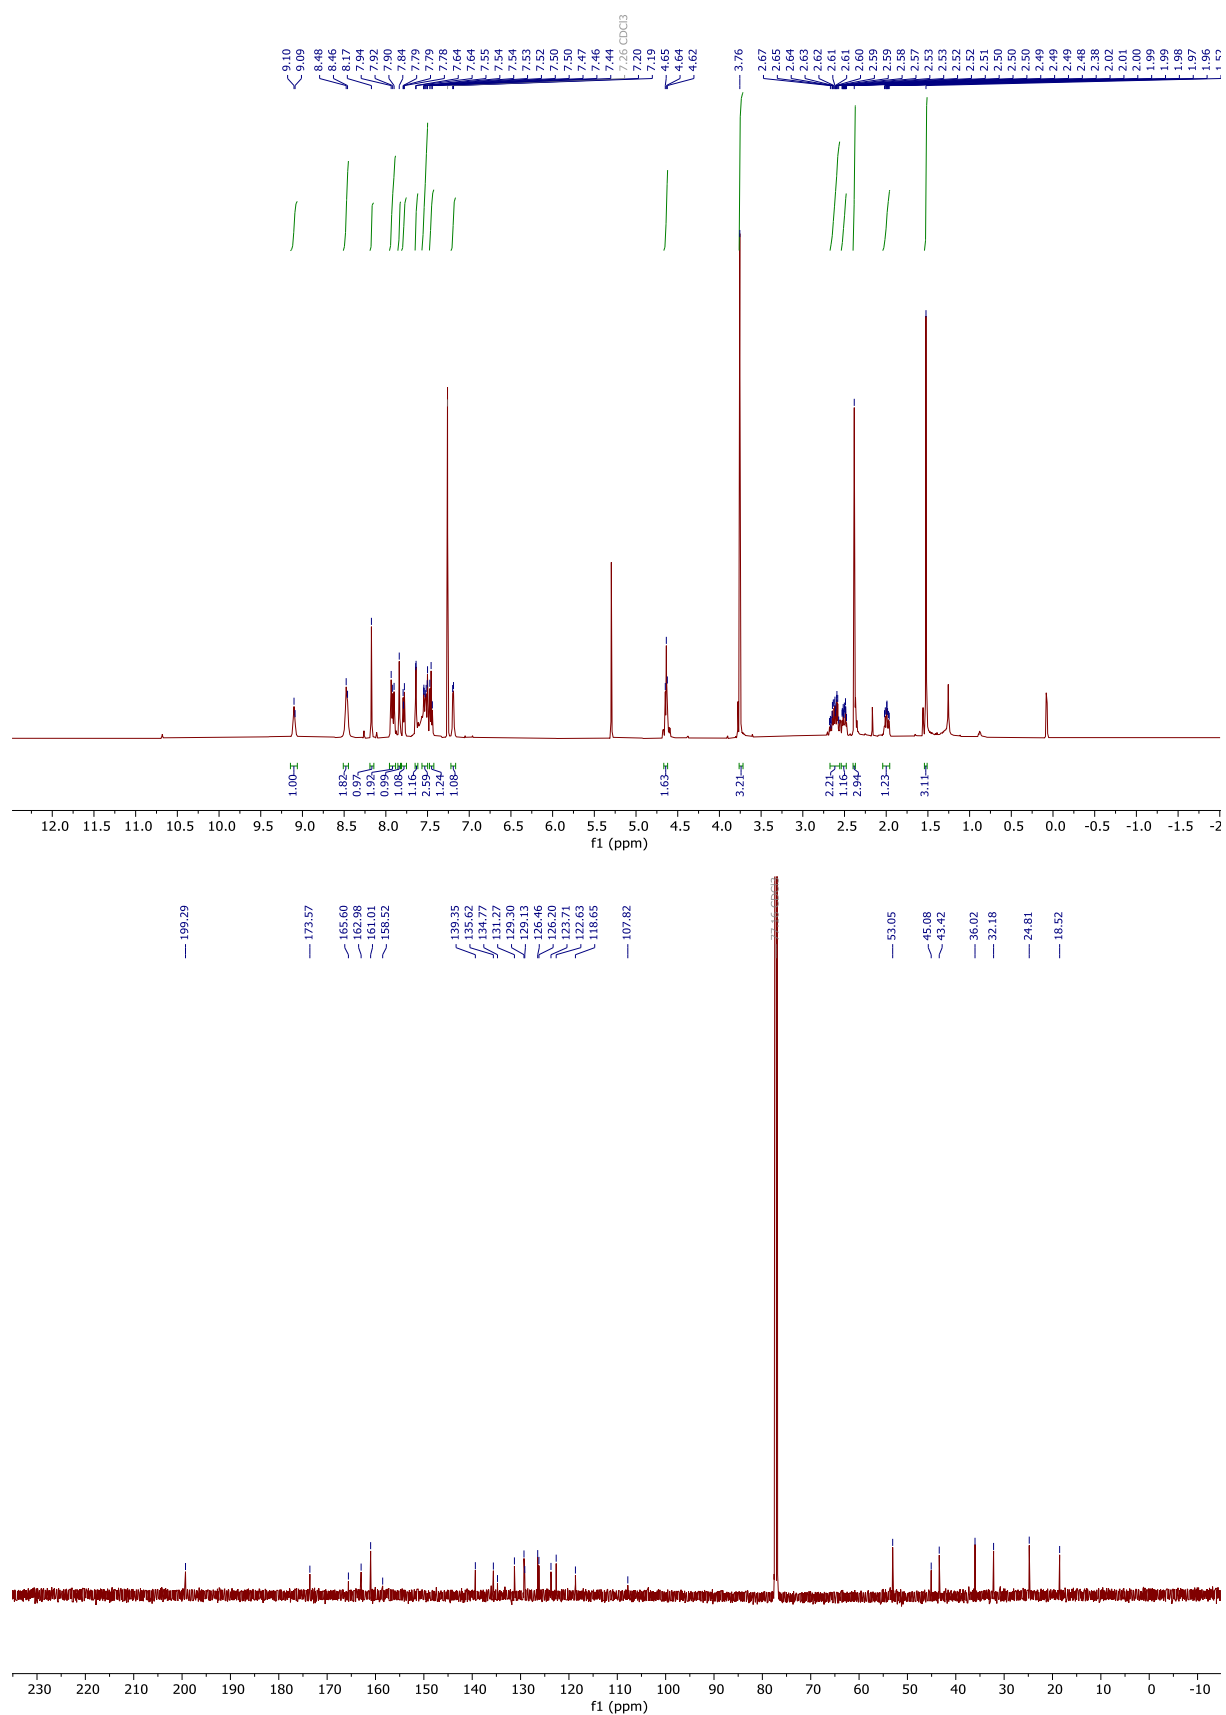

**Supplementary Fig. 39.** The <sup>1</sup>H-NMR (500 MHz) and <sup>13</sup>C-NMR (125 MHz) spectra of compound **1a'R-IN-8** in CDCl<sub>3</sub>

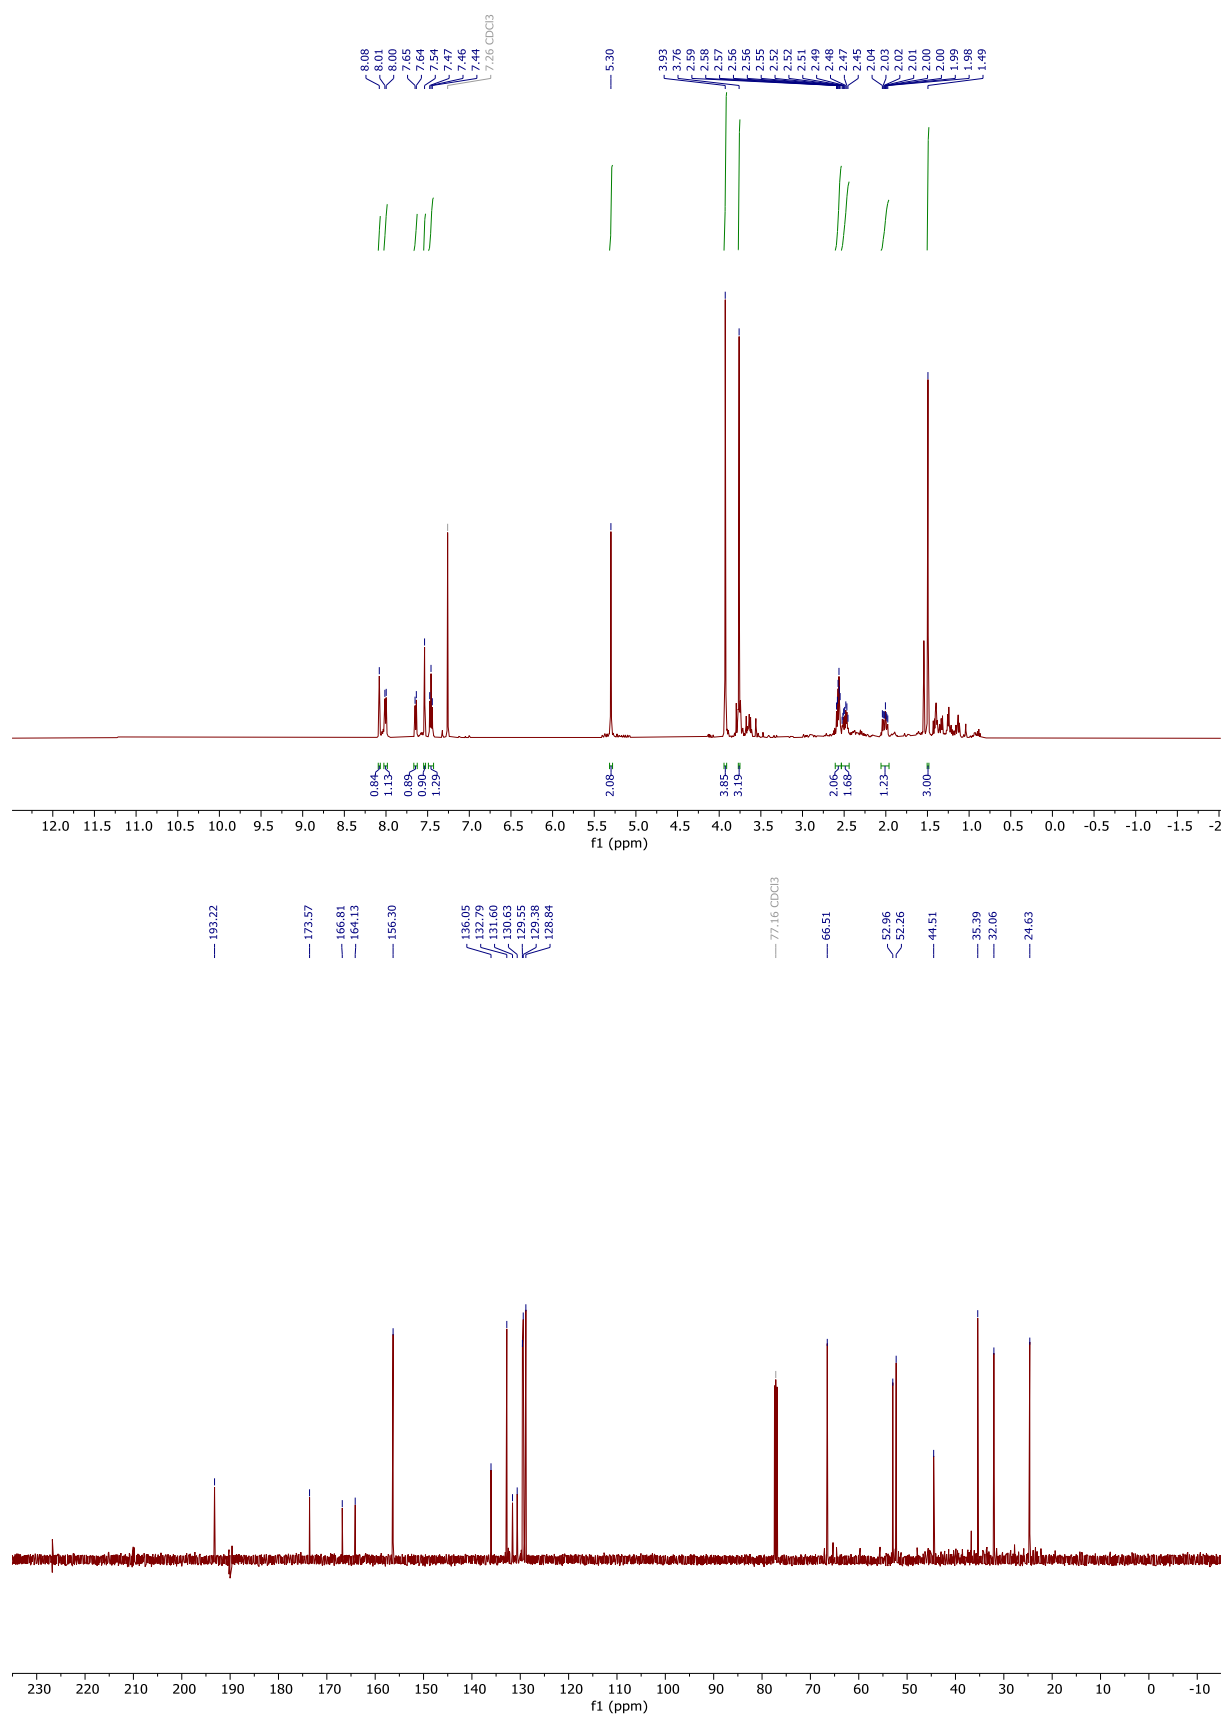

**Supplementary Fig. 40.** The <sup>1</sup>H-NMR (500 MHz) and <sup>13</sup>C-NMR (125 MHz) spectra of compound S29 in CDCl<sub>3</sub>



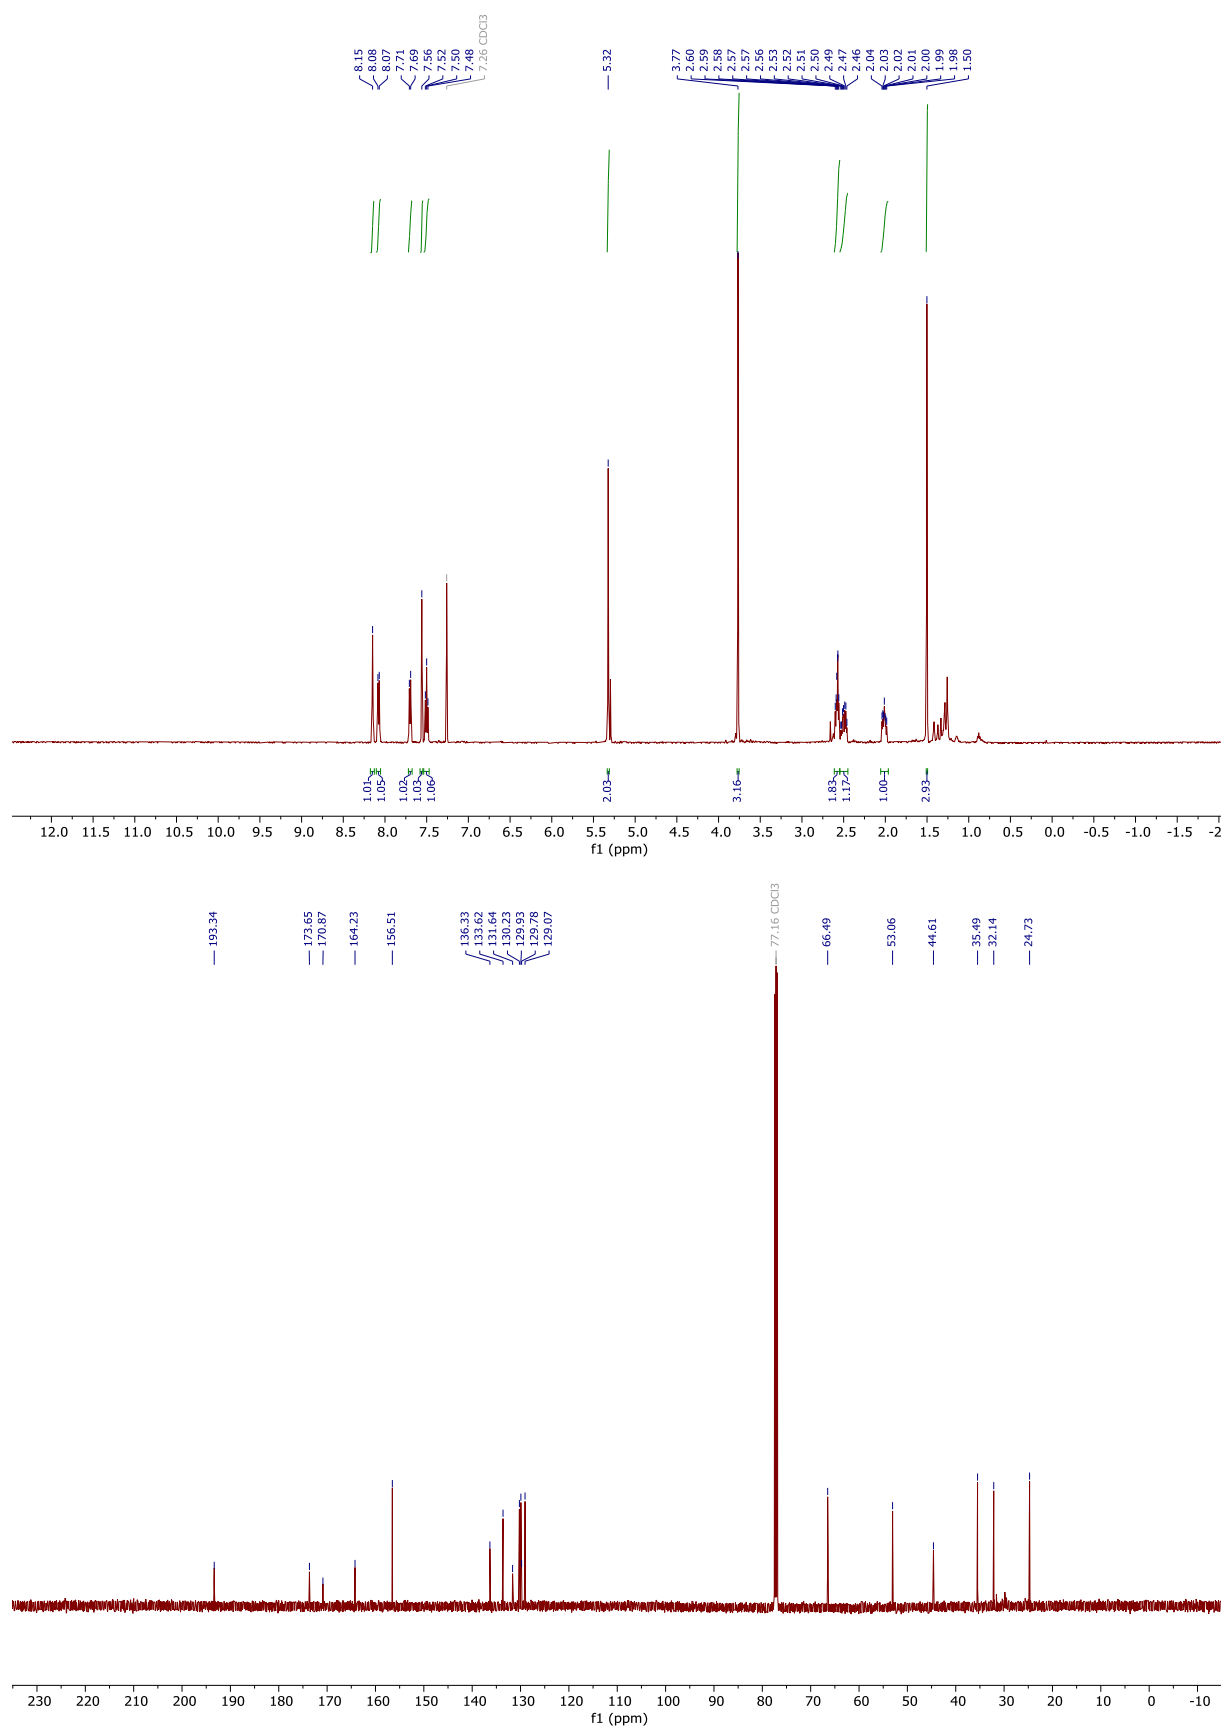

**Supplementary Fig. 41.** The <sup>1</sup>H-NMR (500 MHz) and <sup>13</sup>C-NMR (125 MHz) spectra of compound **S30** in CDCl<sub>3</sub>

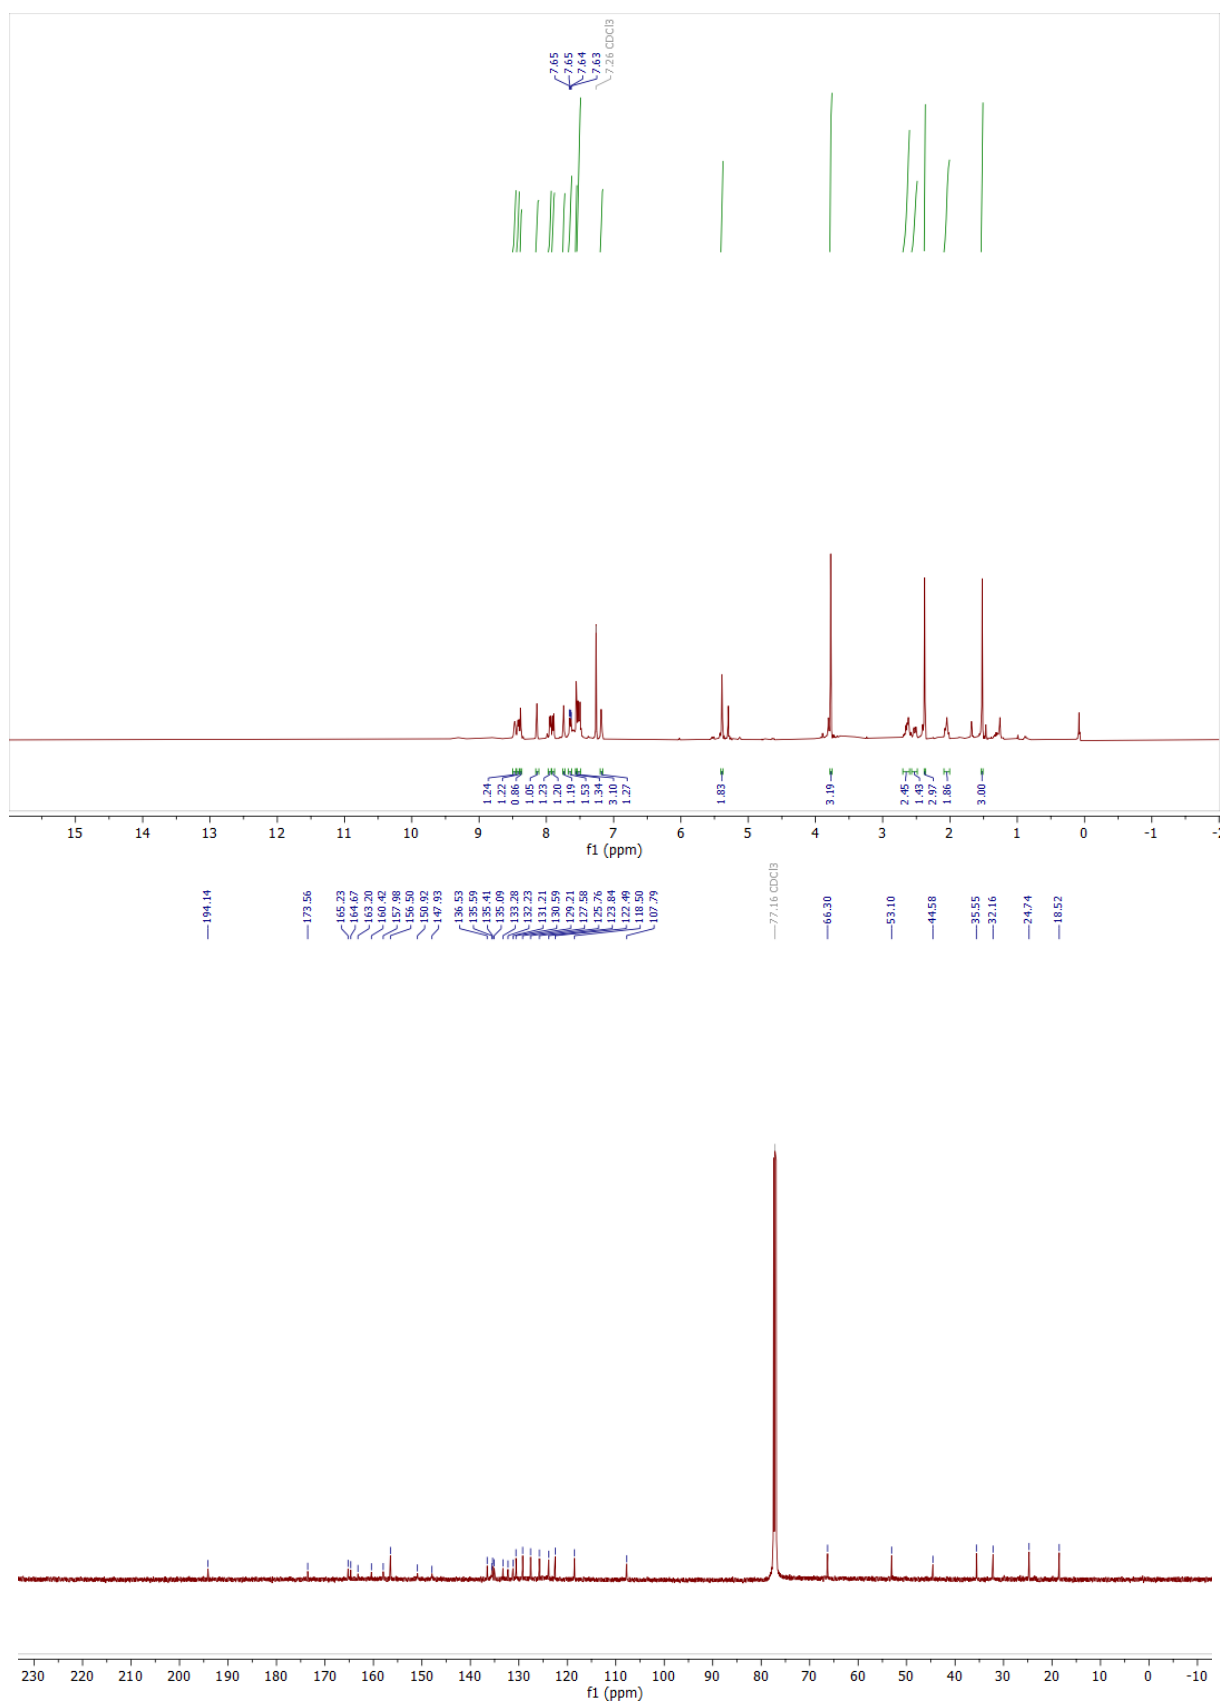

**Supplementary Fig. 42.** The <sup>1</sup>H-NMR (500 MHz) and <sup>13</sup>C-NMR (125 MHz) spectra of compound **1a''R-IN-8** in CDCl<sub>3</sub>

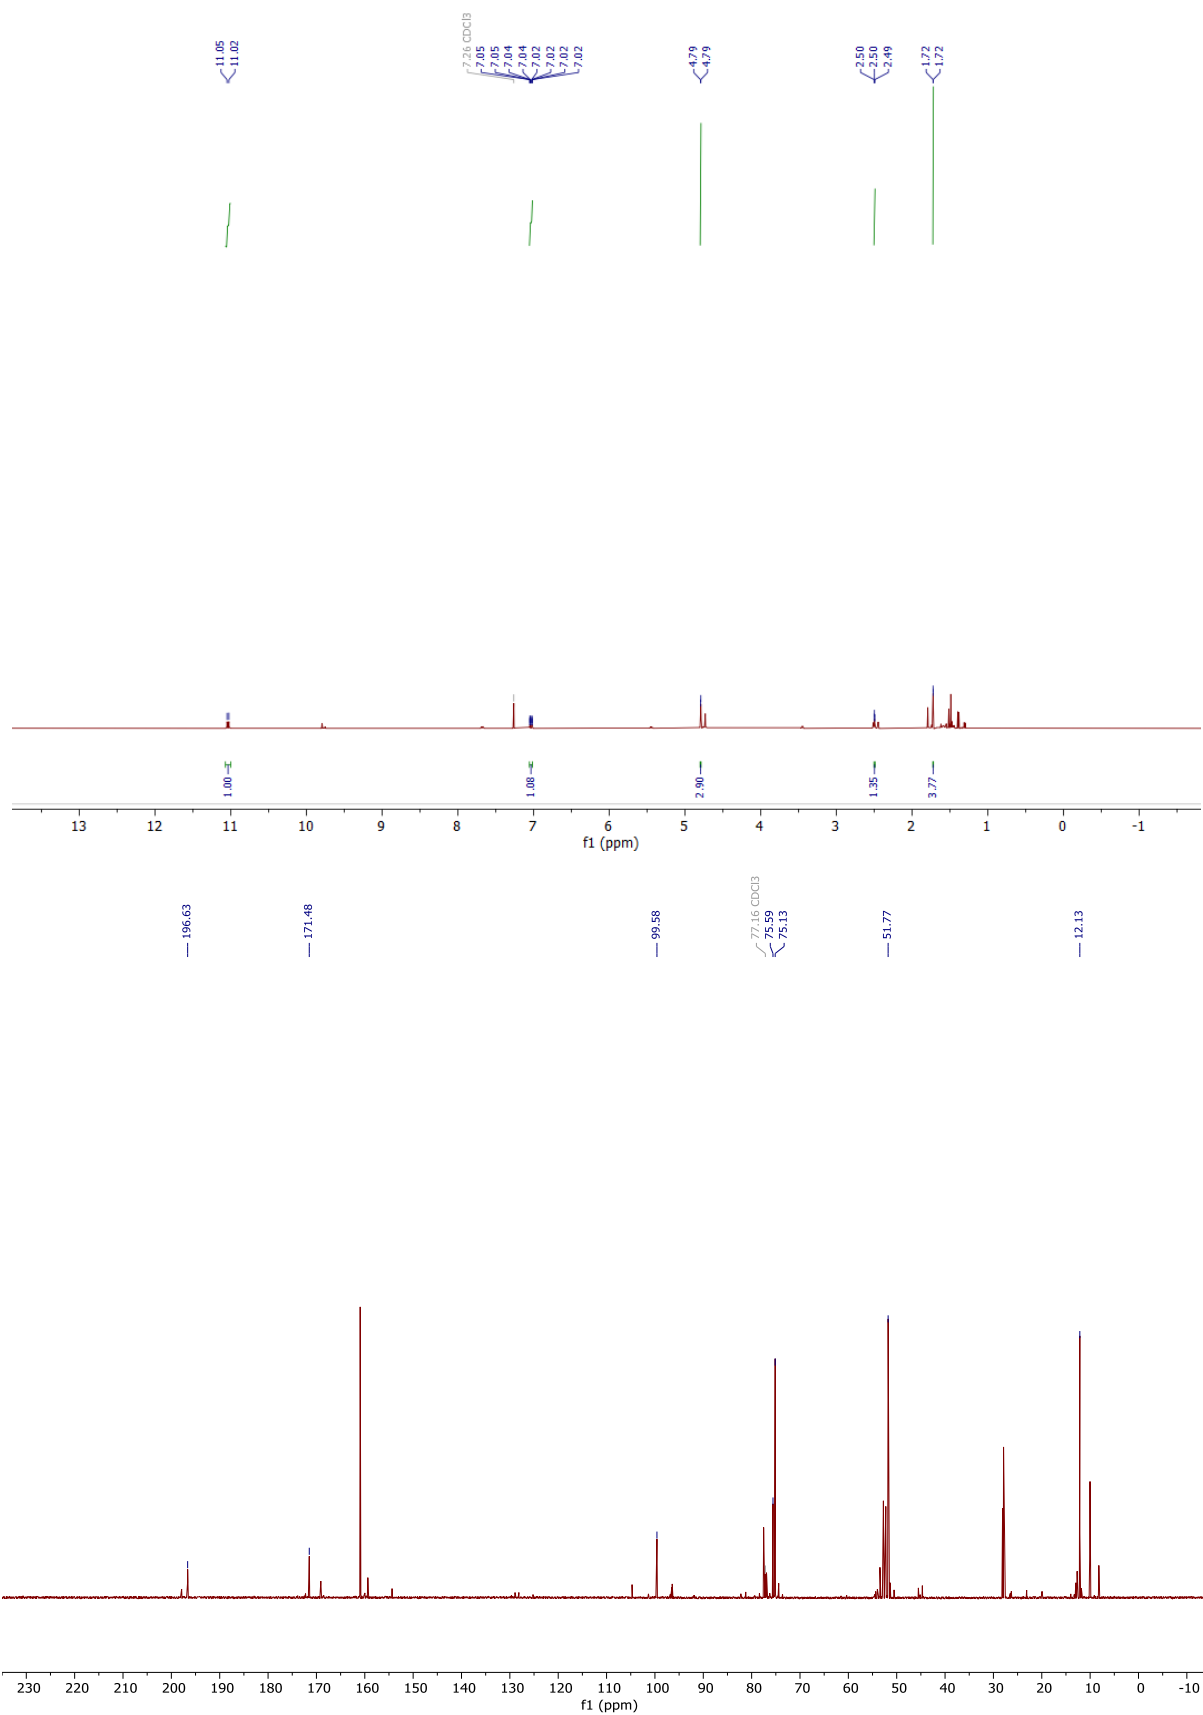

**Supplementary Fig. 43.** The <sup>1</sup>H-NMR (500 MHz) and <sup>13</sup>C-NMR (125 MHz) spectra of compound S2d in CDCl<sub>3</sub>

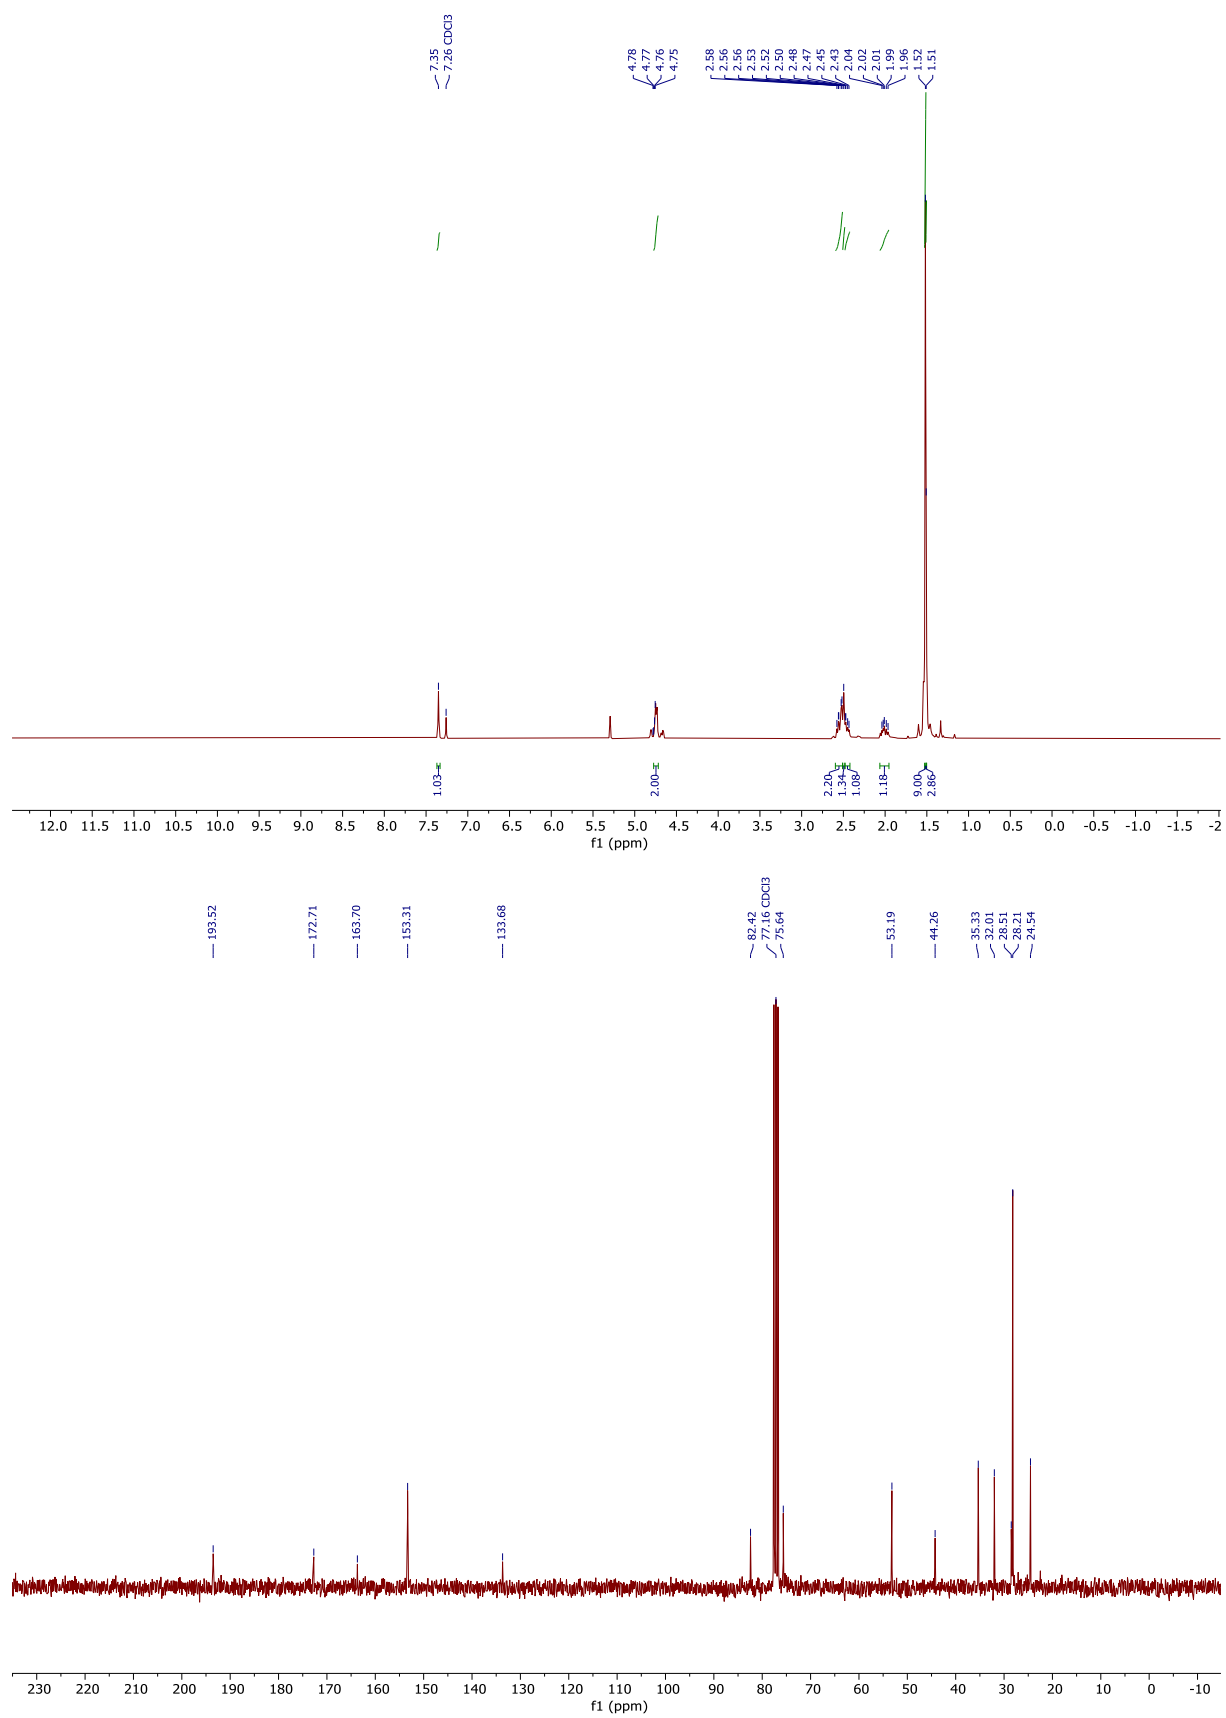

**Supplementary Fig. 44.** The <sup>1</sup>H-NMR (500 MHz) and <sup>13</sup>C-NMR (125 MHz) spectra of compound S32R/S32S in CDCl<sub>3</sub>

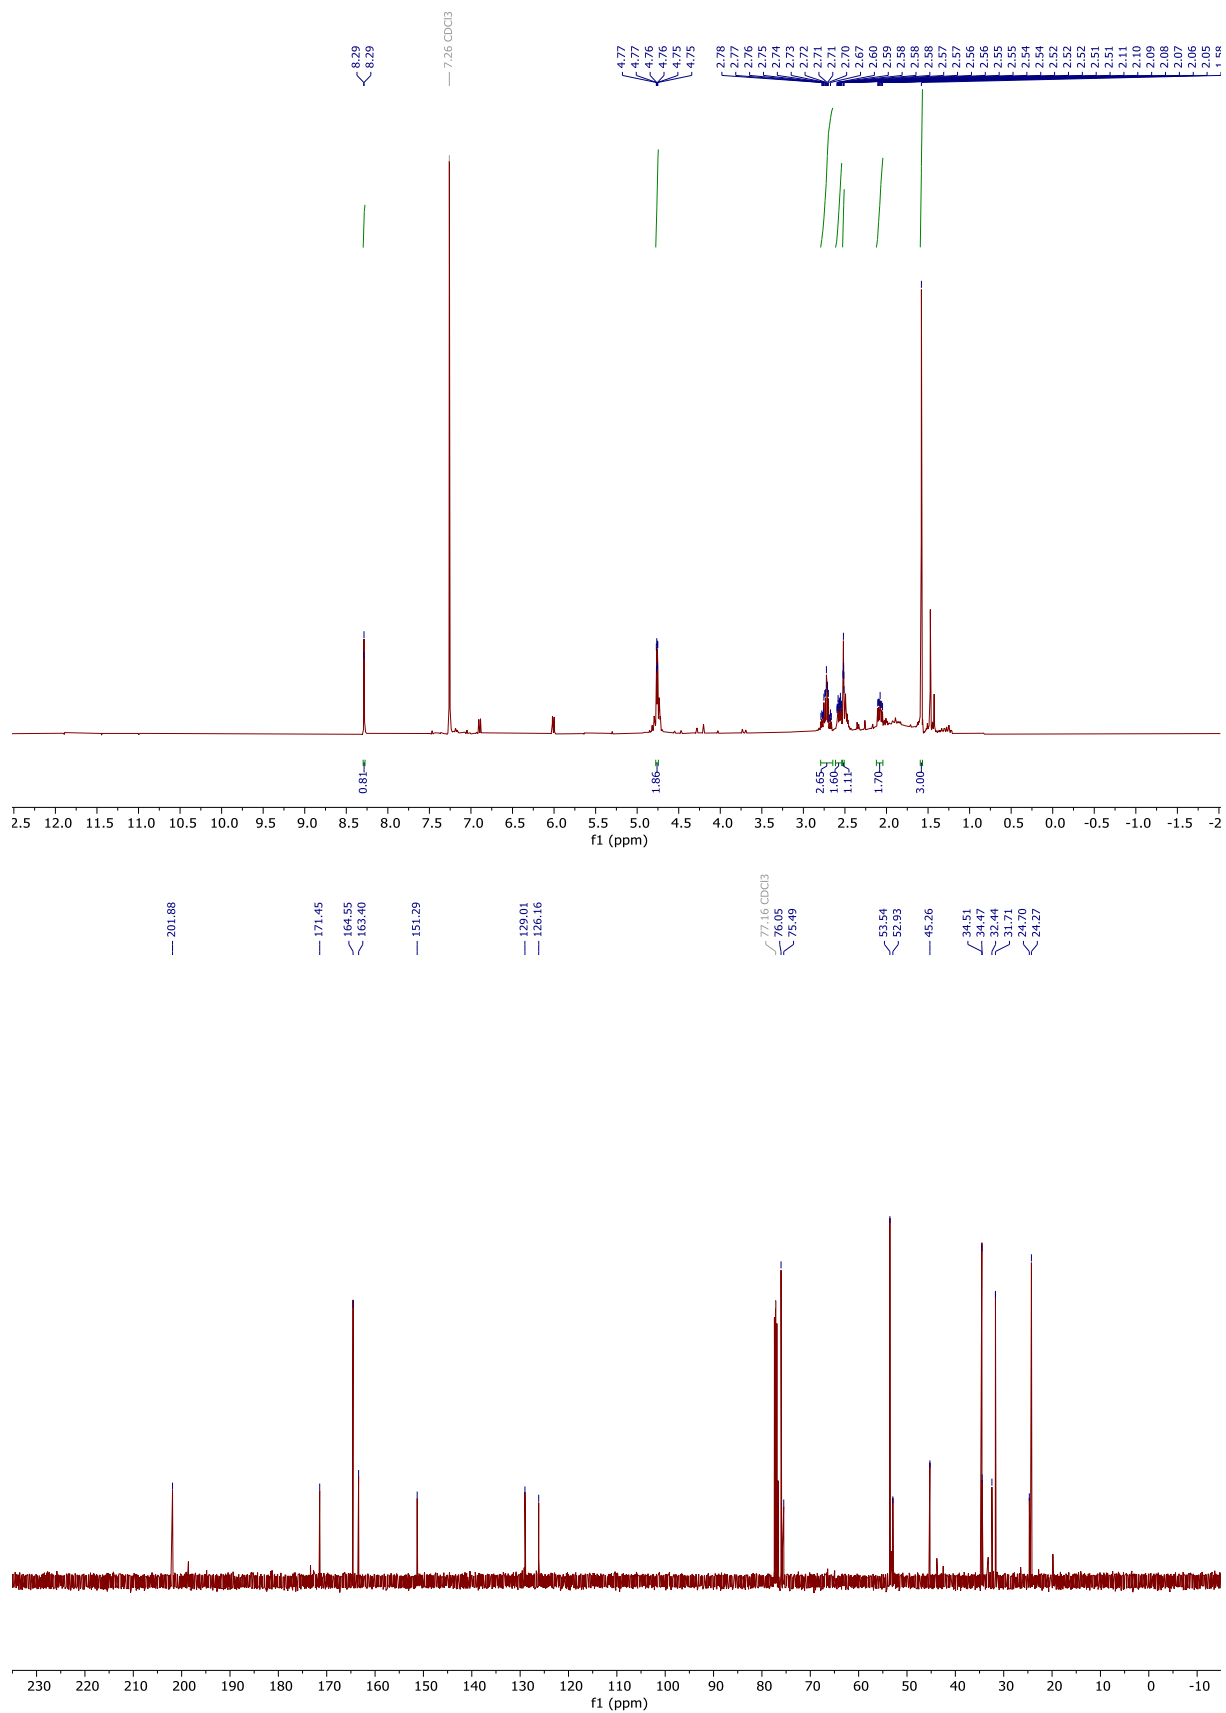

**Supplementary Fig. 45.** The <sup>1</sup>H-NMR (500 MHz) and <sup>13</sup>C-NMR (125 MHz) spectra of compound S33R/S33S in CDCl<sub>3</sub>

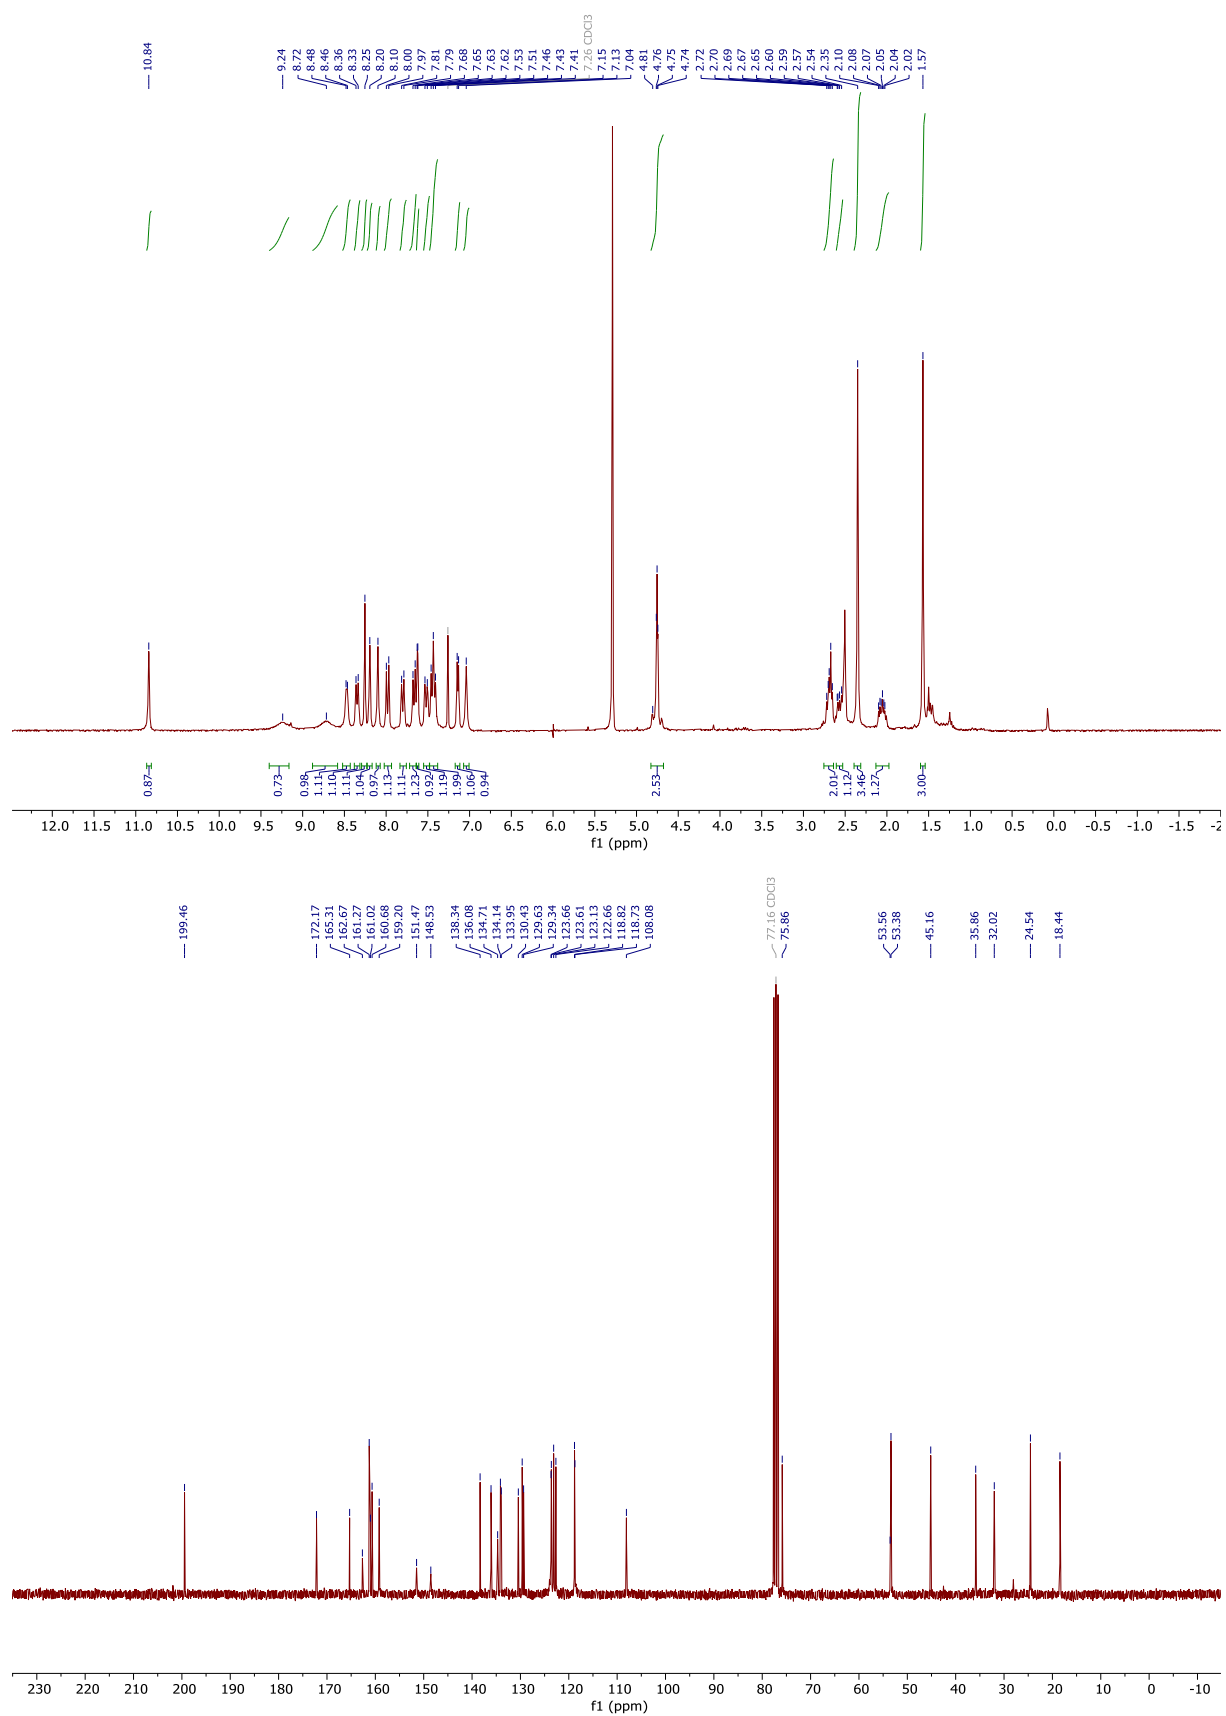

**Supplementary Fig. 46.** The <sup>1</sup>H-NMR (500 MHz) and <sup>13</sup>C-NMR (125 MHz) spectra of compound **1bR-IN-8/1bS-IN-8** in CDCl<sub>3</sub>

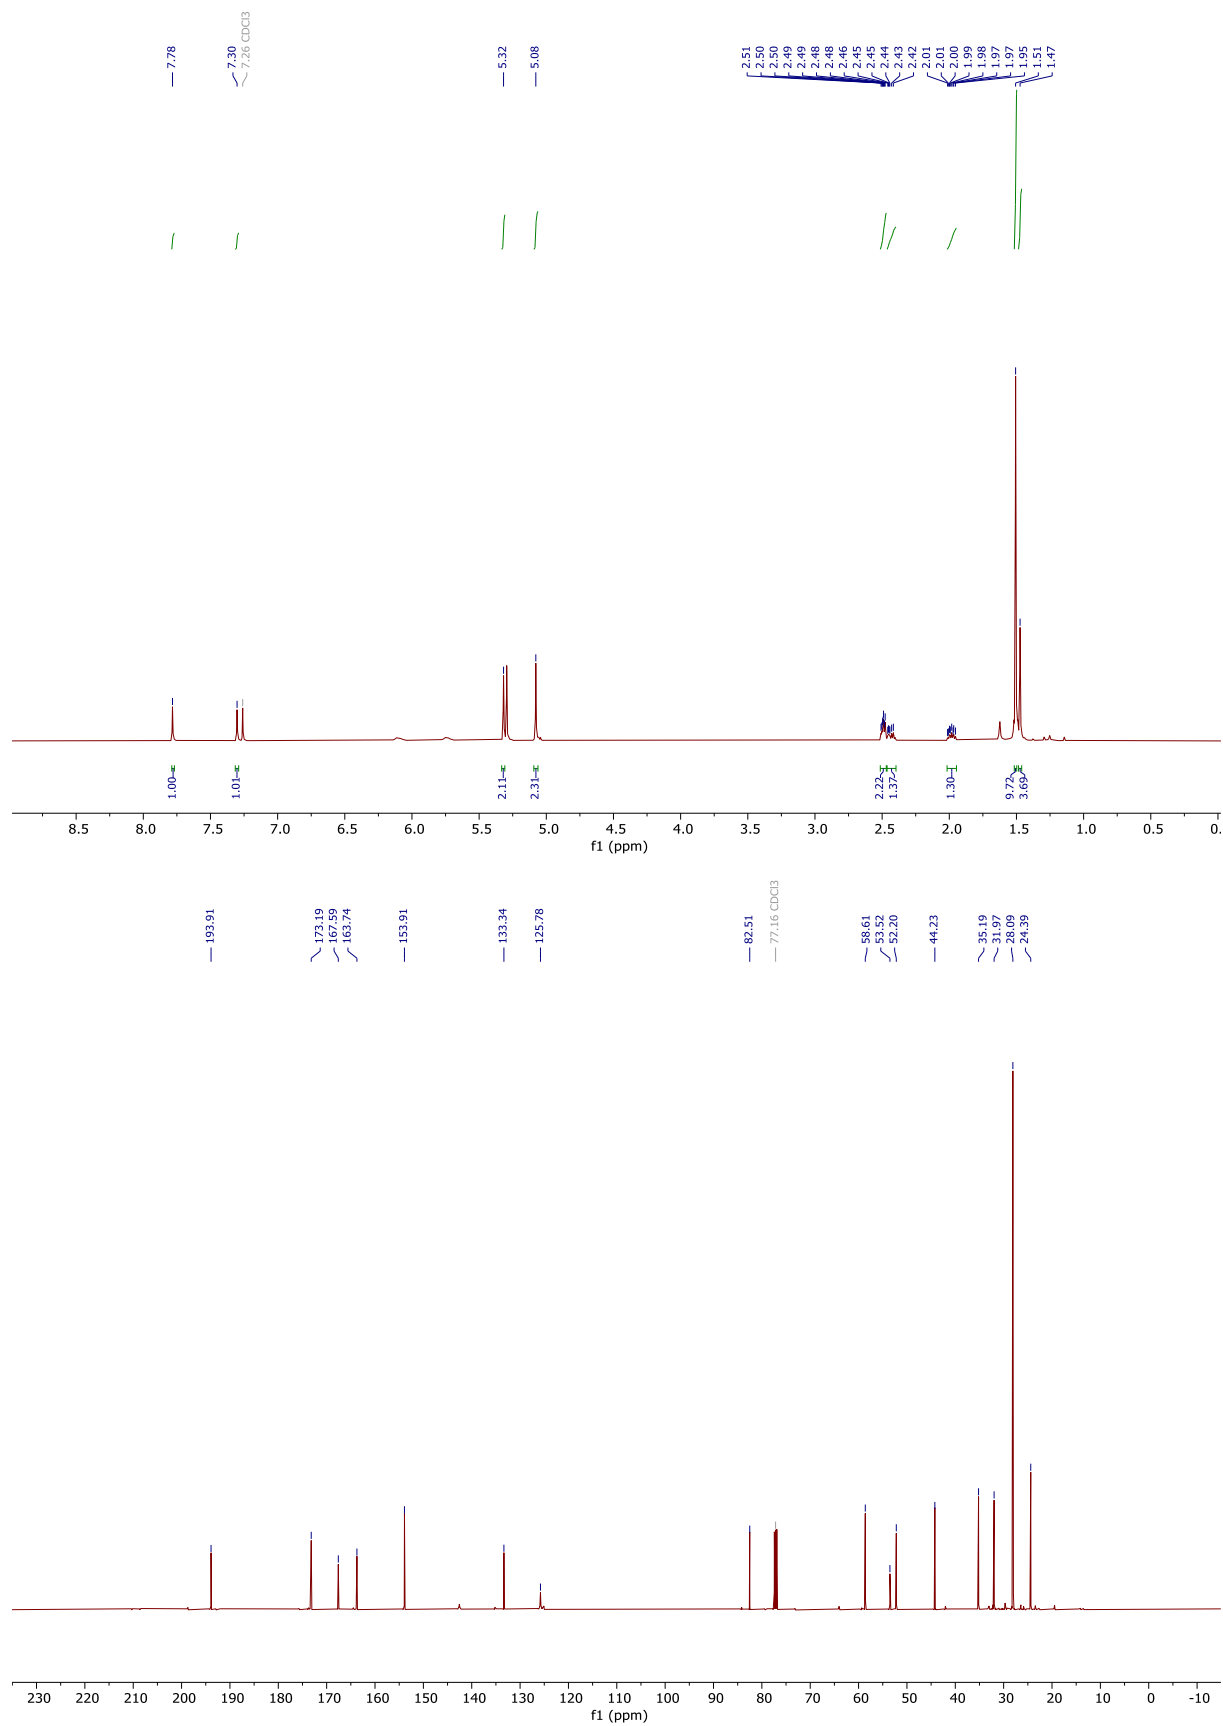

**Supplementary Fig. 47.** The <sup>1</sup>H-NMR (500 MHz) and <sup>13</sup>C-NMR (125 MHz) spectra of compound S34R/S34S in CDCl<sub>3</sub>

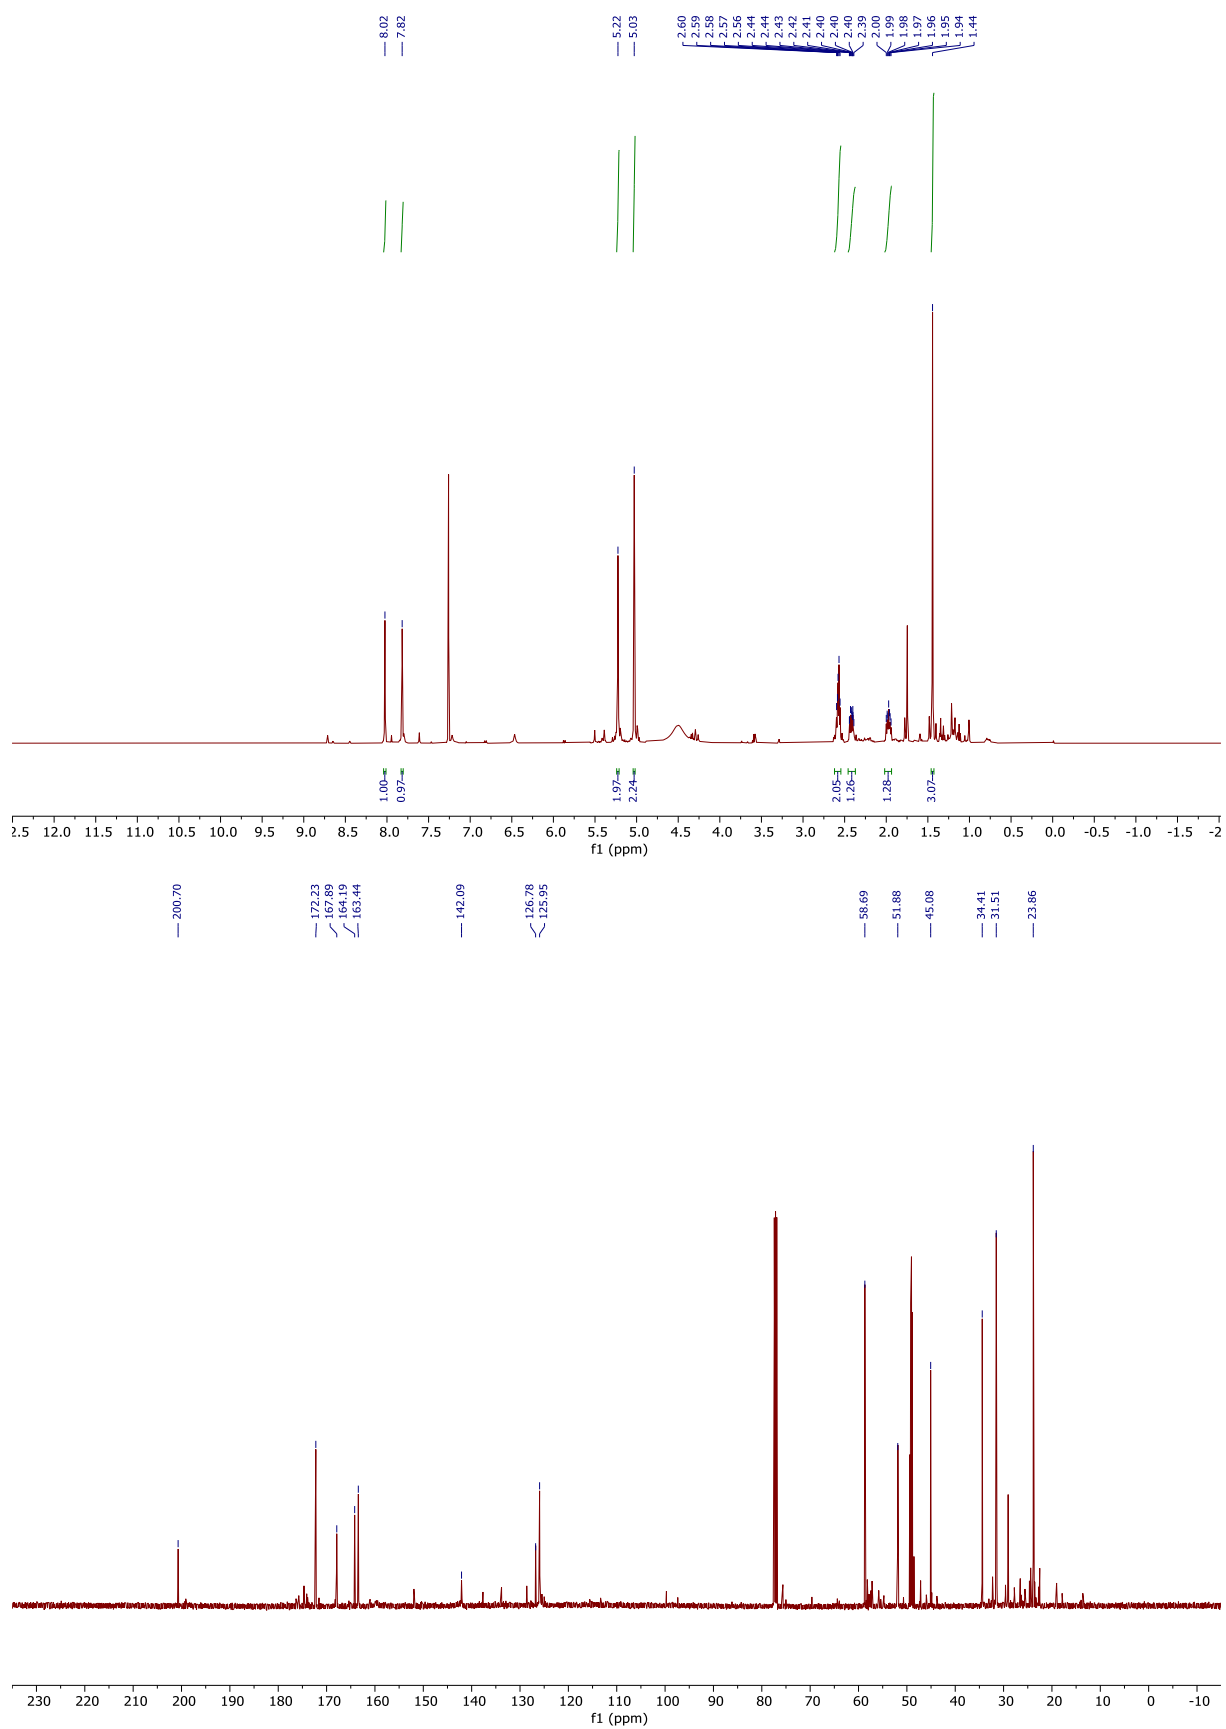

**Supplementary Fig. 48.** The <sup>1</sup>H-NMR (500 MHz) and <sup>13</sup>C-NMR (125 MHz) spectra of compound S35R/S35S in CDCl<sub>3</sub>



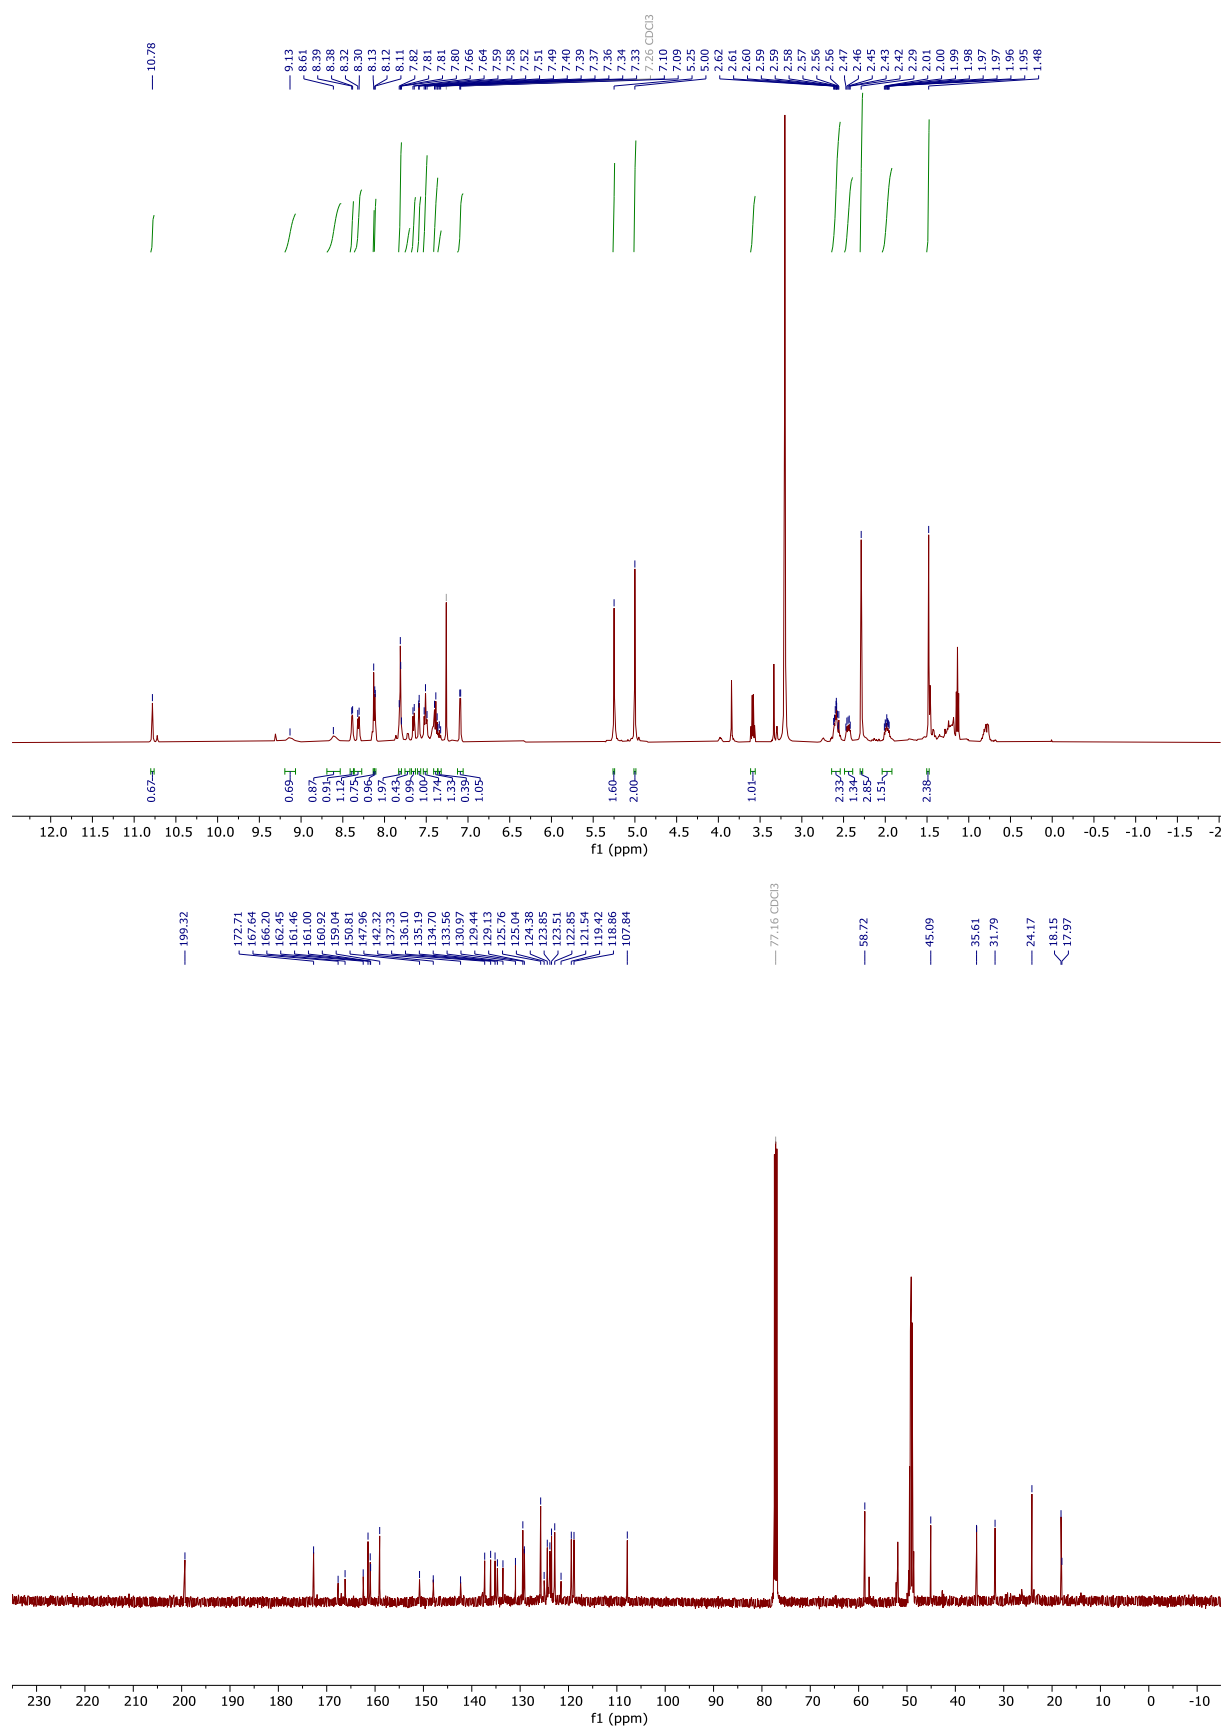

**Supplementary Fig. 49.** The <sup>1</sup>H-NMR (500 MHz) and <sup>13</sup>C-NMR (125 MHz) spectra of compound **1cR-IN-8/1cS-IN-8** in CDCl<sub>3</sub>

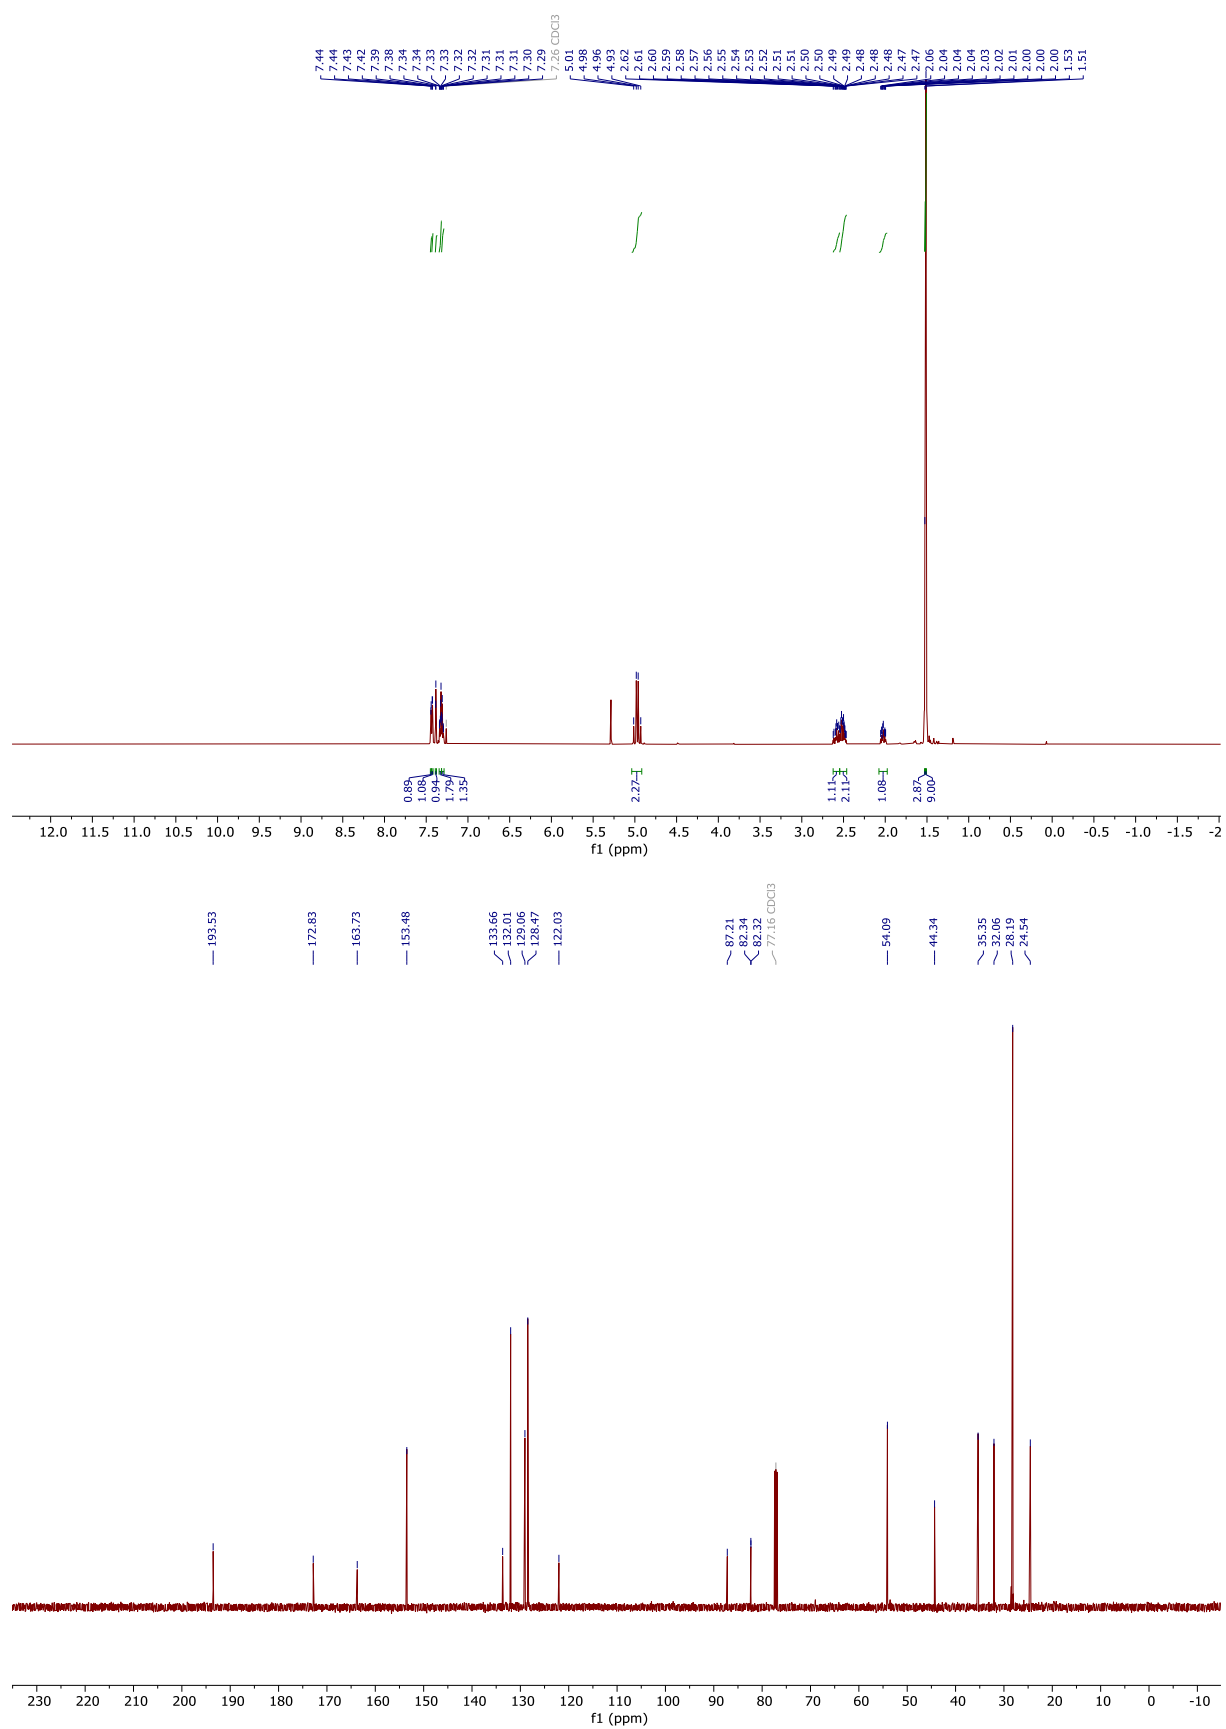

**Supplementary Fig. 50.** The <sup>1</sup>H-NMR (500 MHz) and <sup>13</sup>C-NMR (125 MHz) spectra of compound **S36R** in CDCl<sub>3</sub>

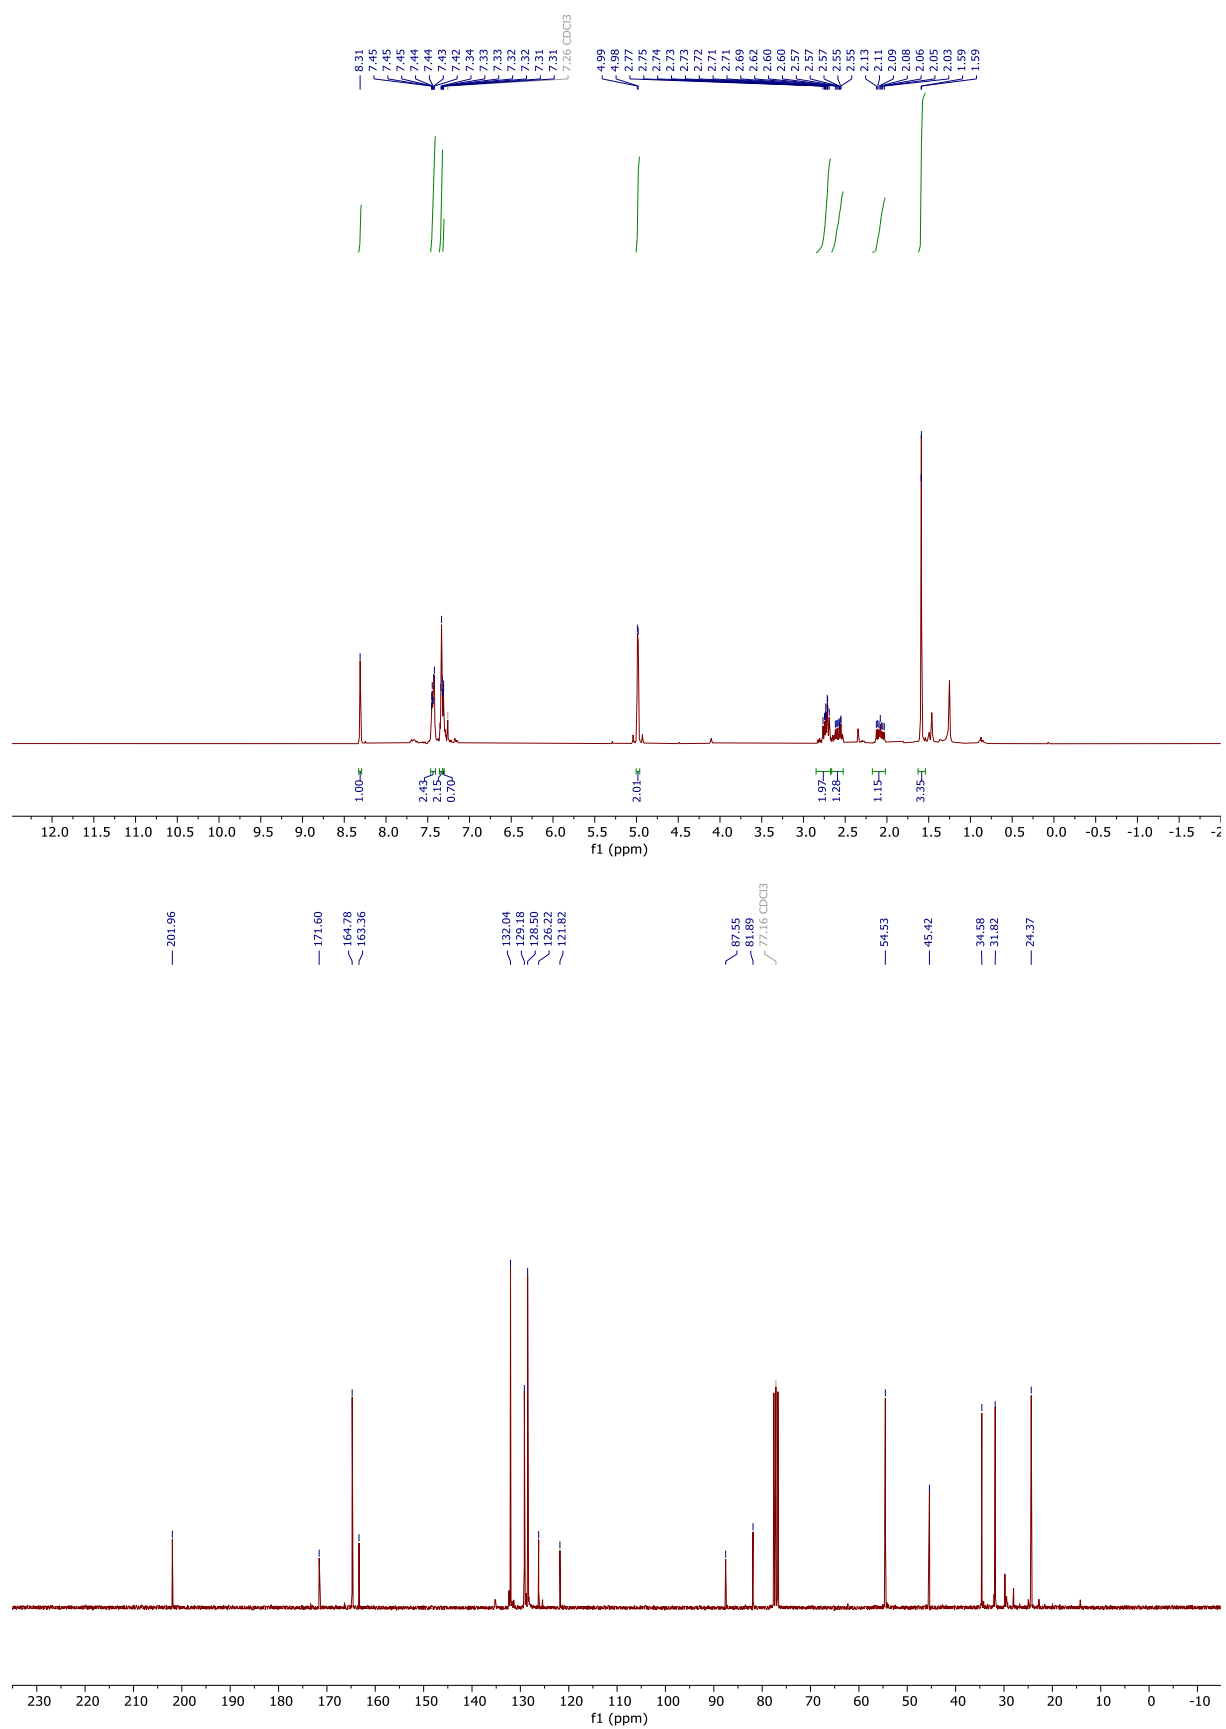

**Supplementary Fig. 51.** The <sup>1</sup>H-NMR (500 MHz) and <sup>13</sup>C-NMR (125 MHz) spectra of compound **S37R** in CDCl<sub>3</sub>

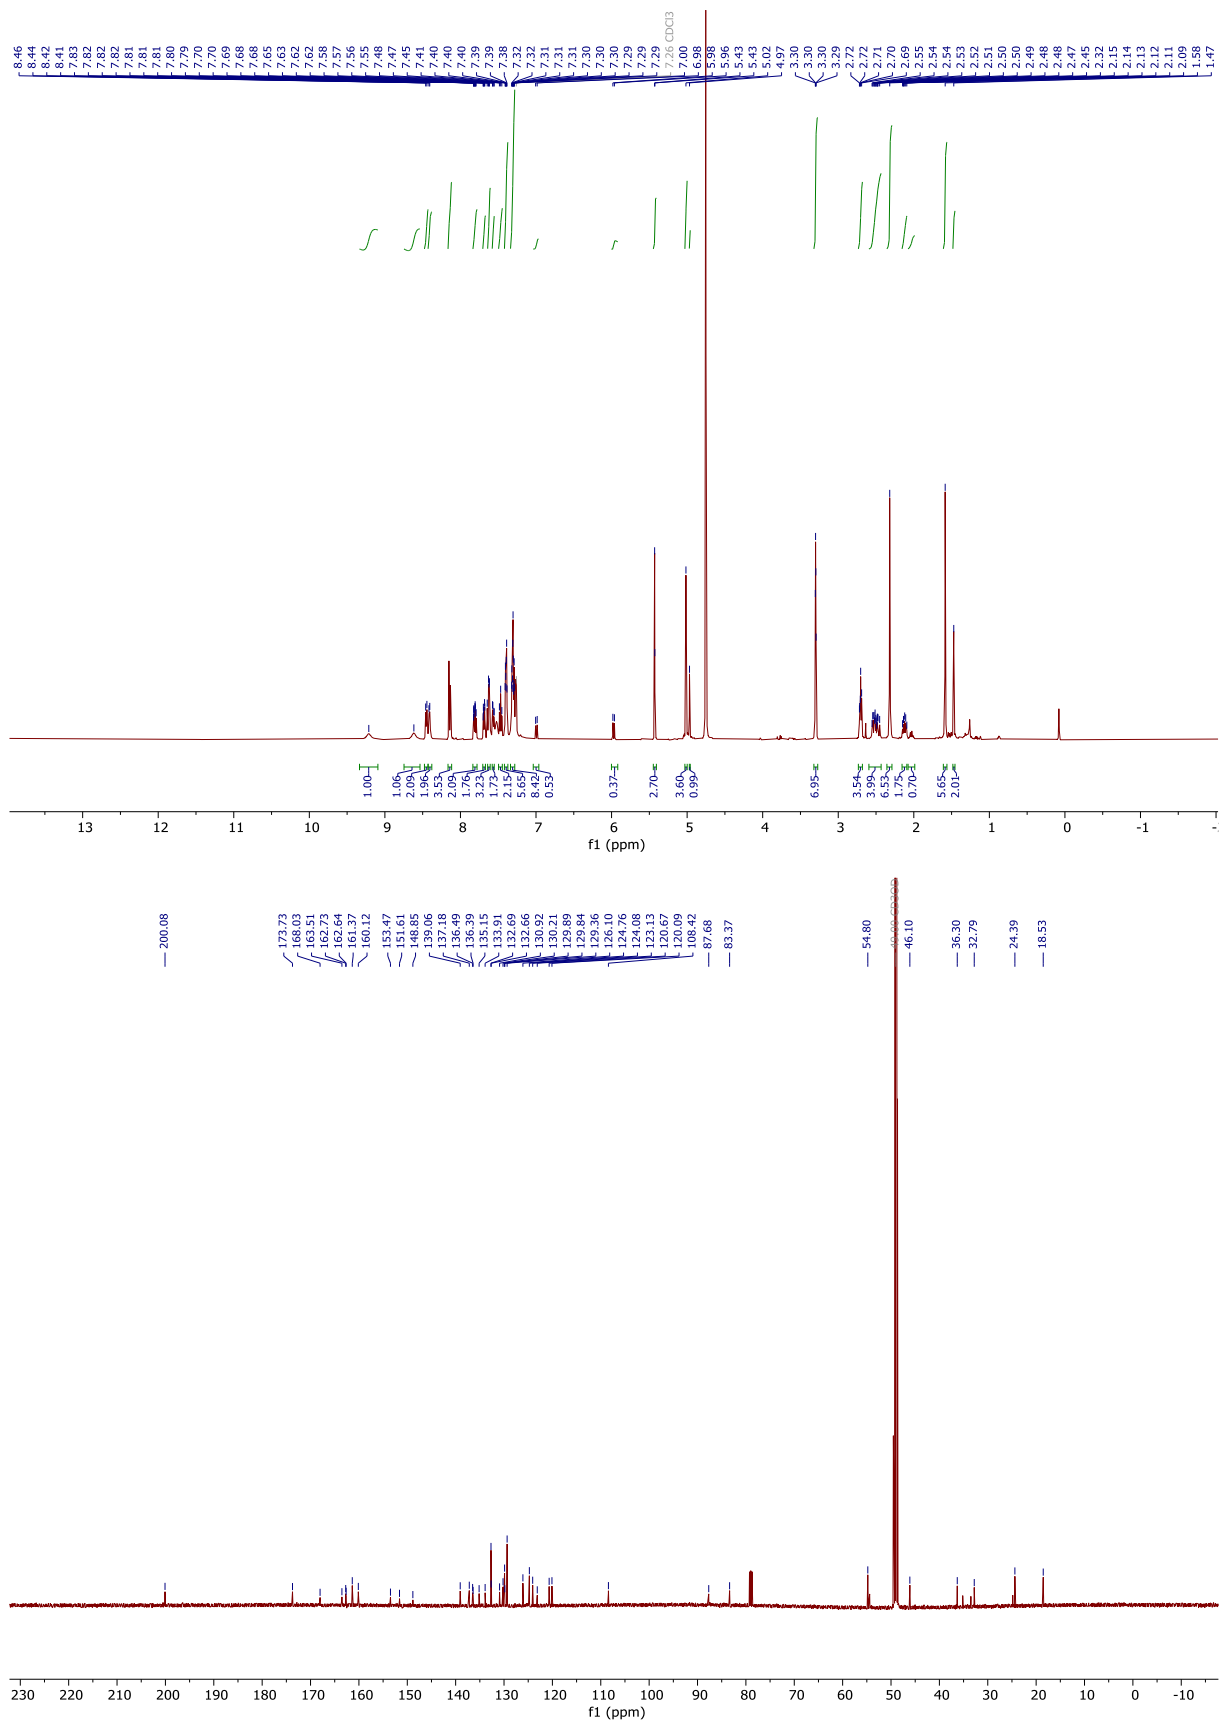

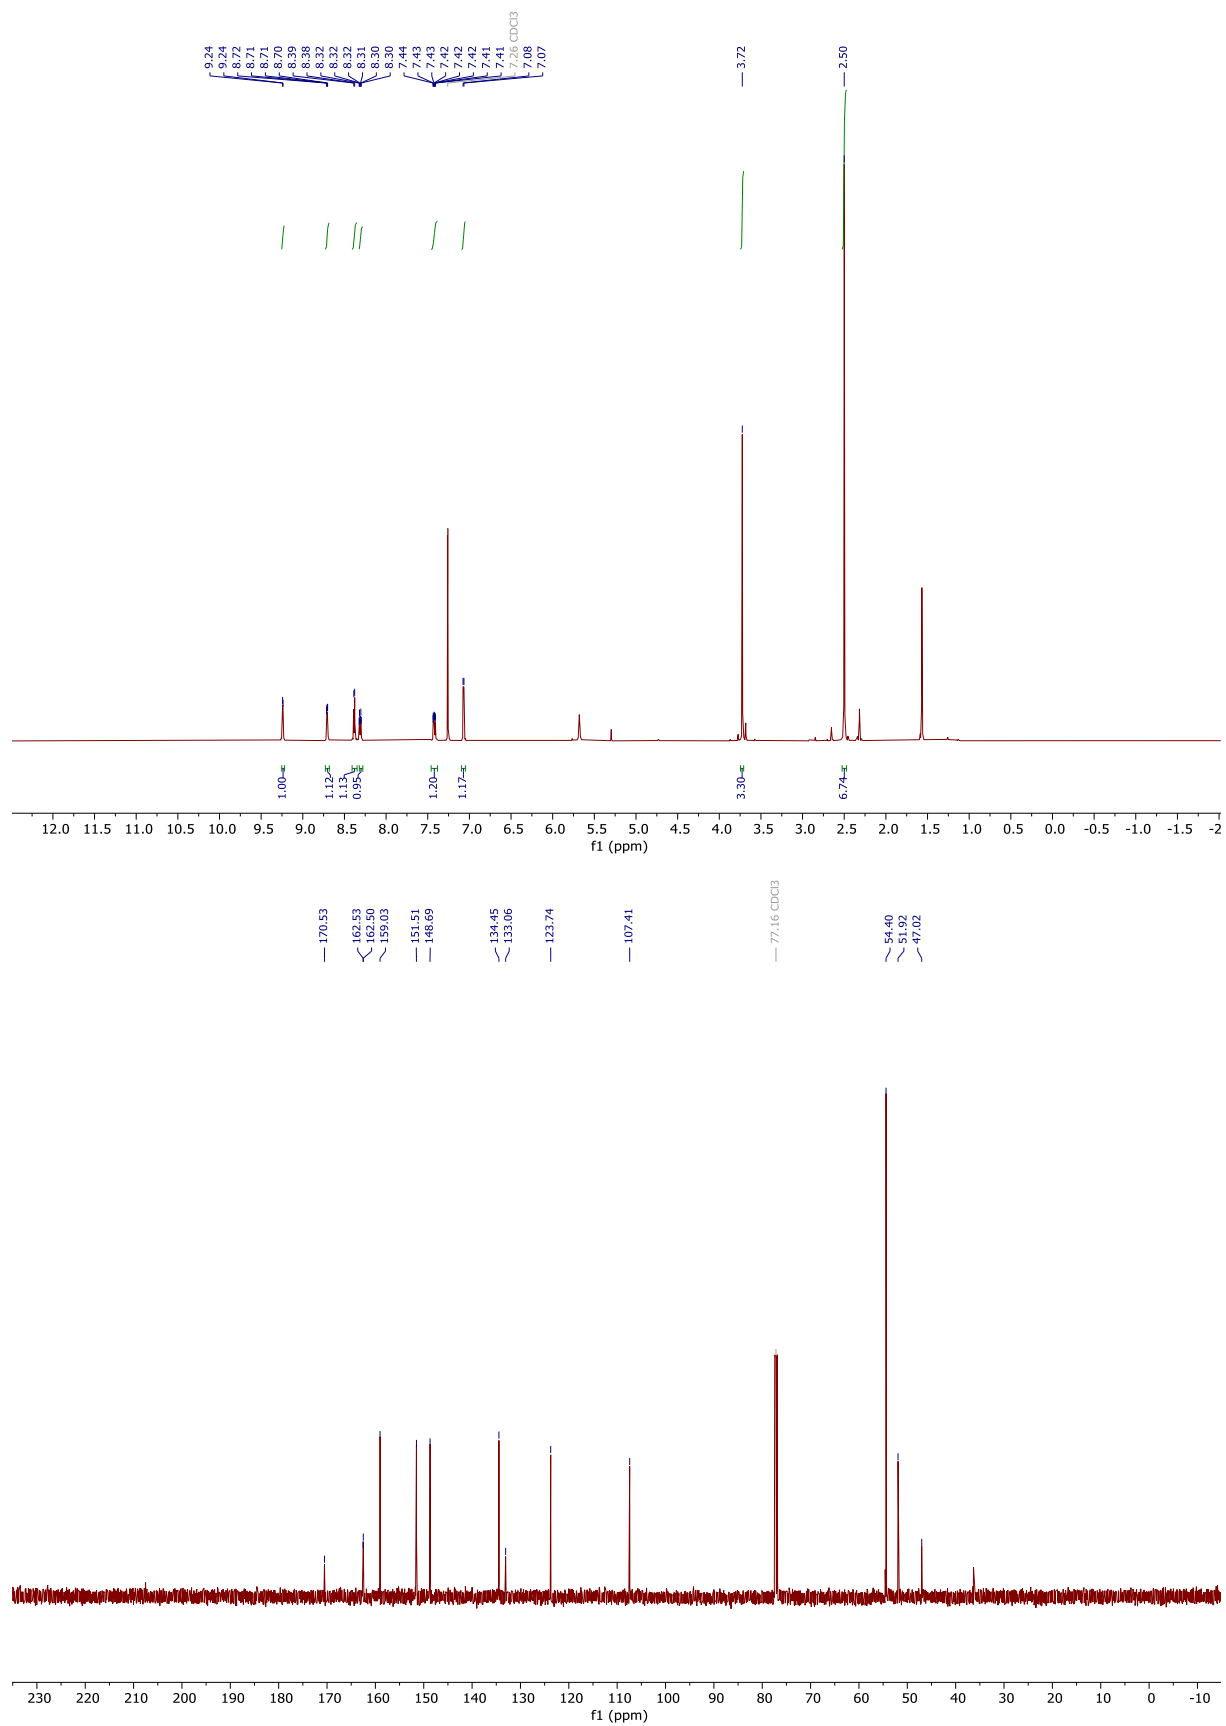

**Supplementary Fig. 53.** The <sup>1</sup>H-NMR (500 MHz) and <sup>13</sup>C-NMR (125 MHz) spectra of compound **S39** in CDCl<sub>3</sub>

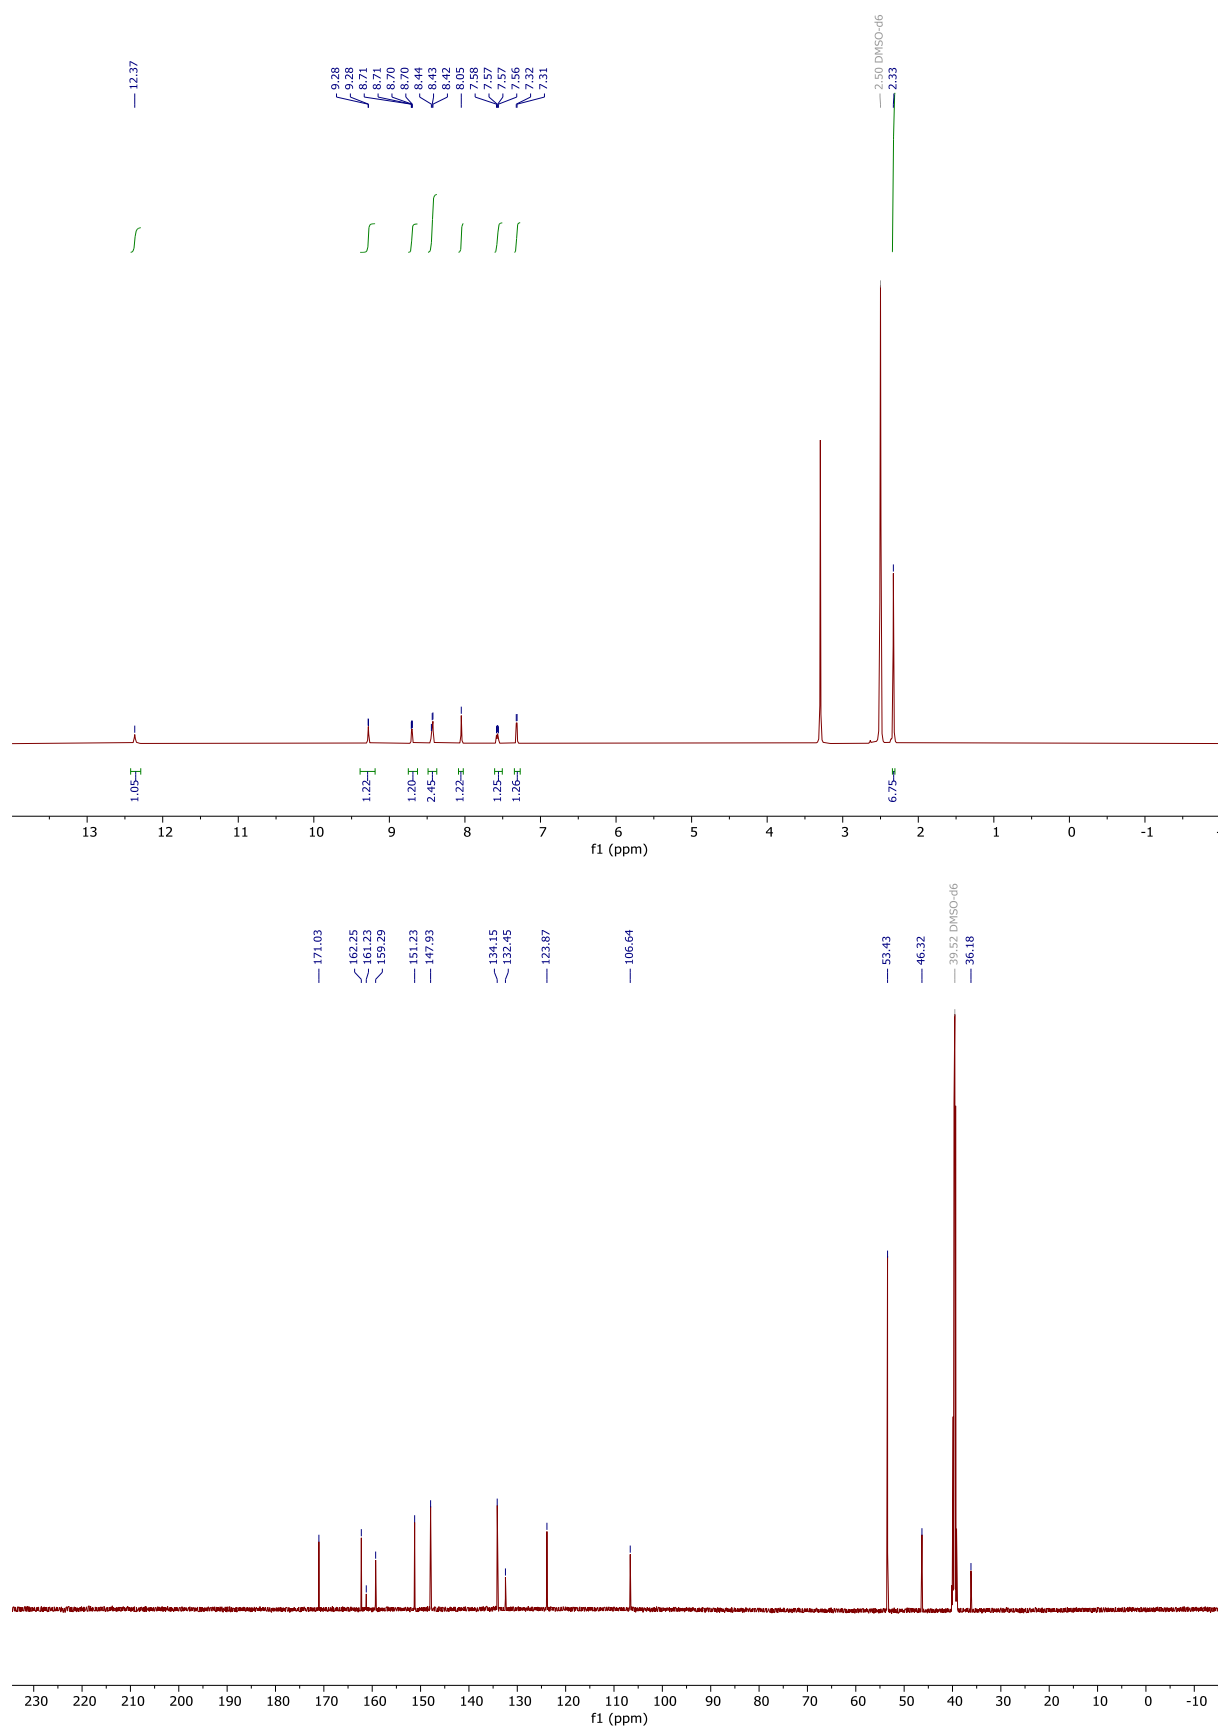

**Supplementary Fig. 54.** The <sup>1</sup>H-NMR (500 MHz) and <sup>13</sup>C-NMR (125 MHz) spectra of compound **S40** in DMSO-d<sub>6</sub>

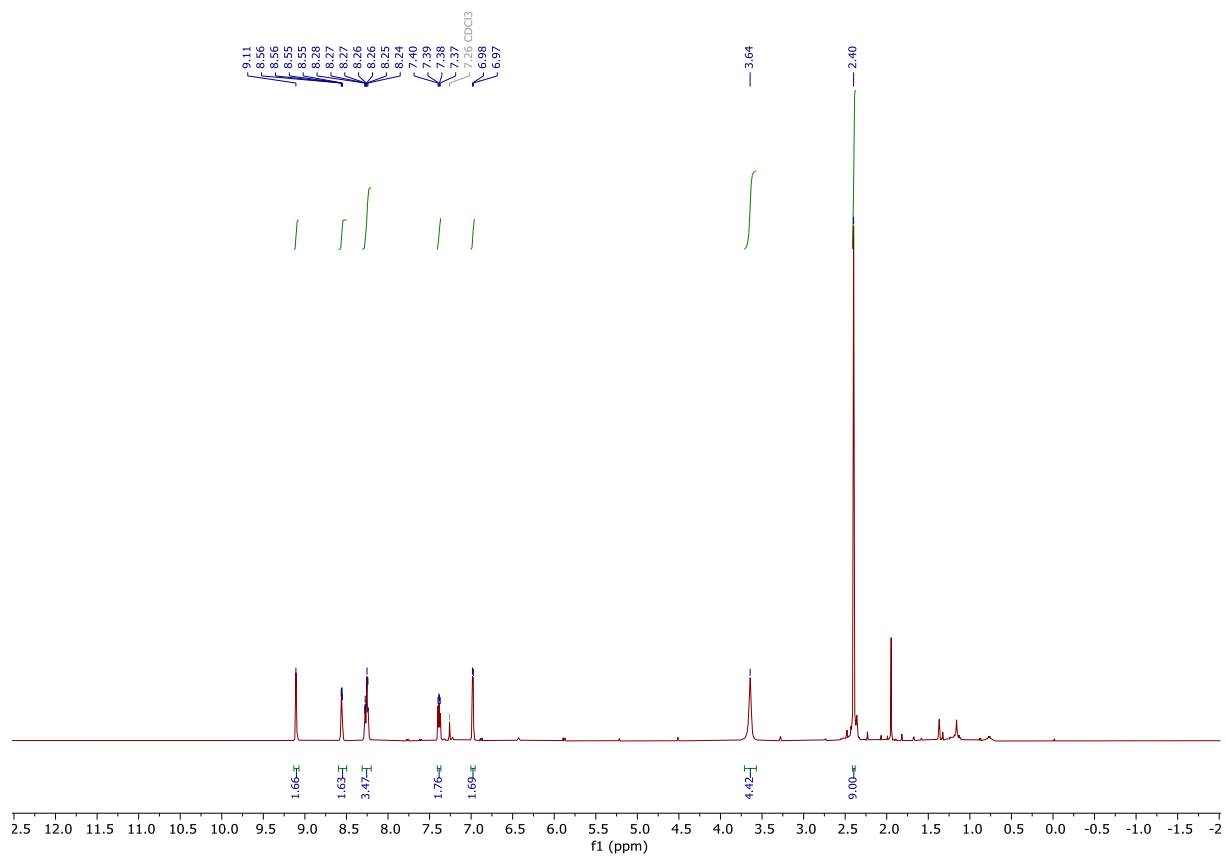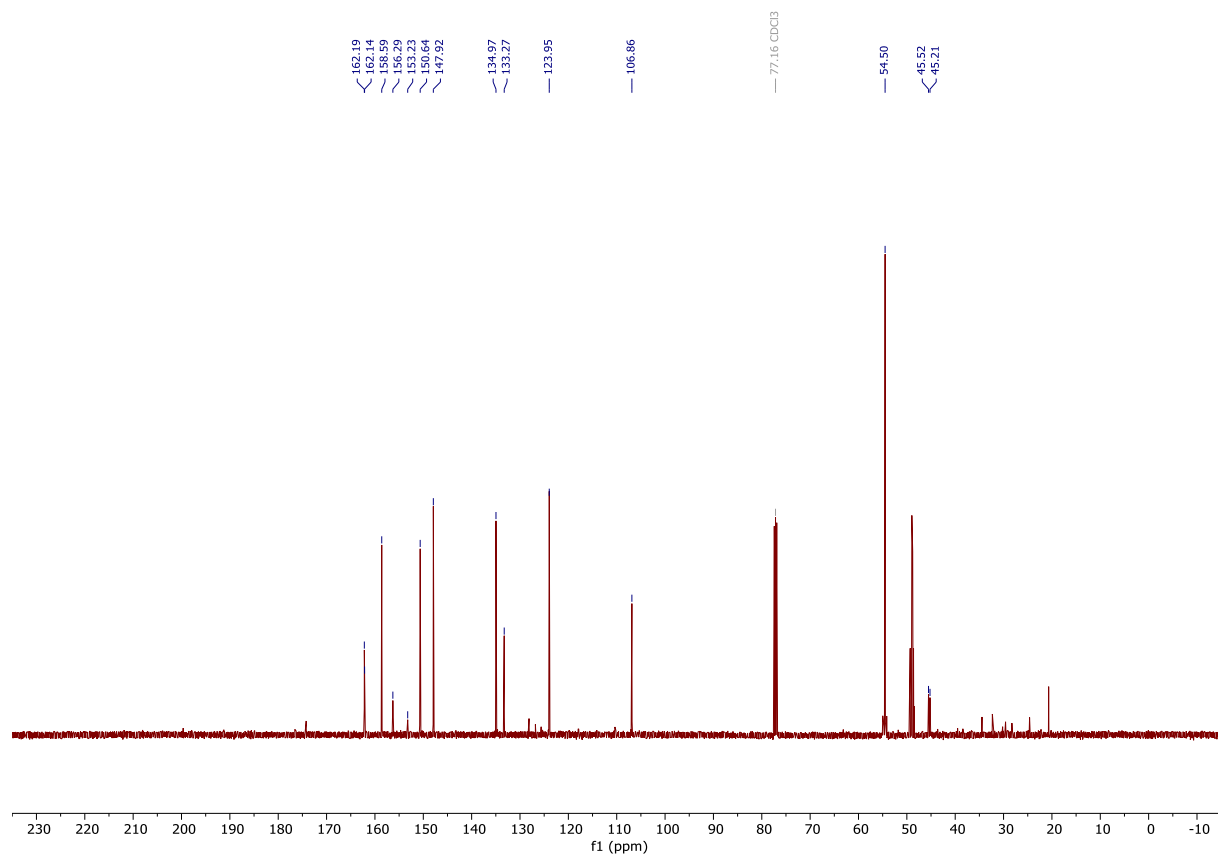

**Supplementary Fig. 55.** The <sup>1</sup>H-NMR (500 MHz) and <sup>13</sup>C-NMR (125 MHz) spectra of compound **S41** in CDCl<sub>3</sub>

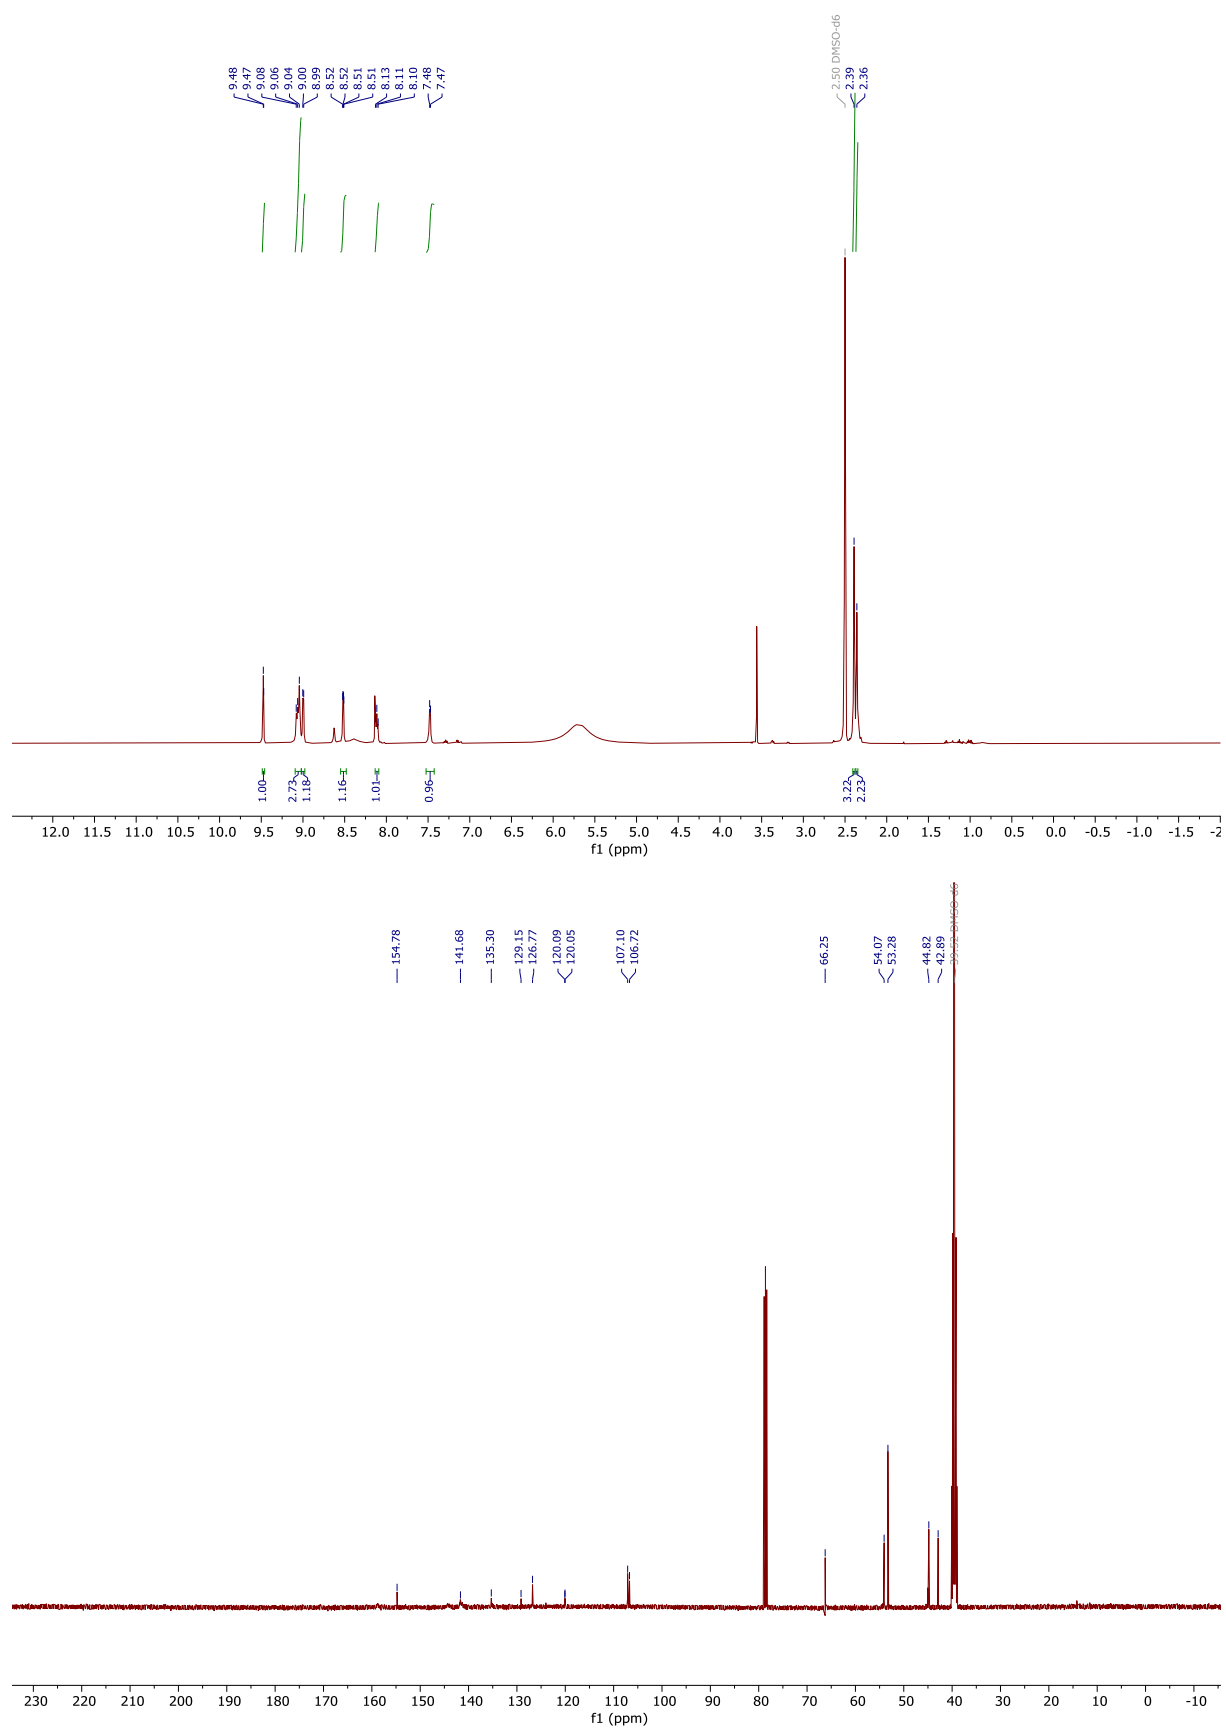

**Supplementary Fig. 56.** The <sup>1</sup>H-NMR (500 MHz) and <sup>13</sup>C-NMR (125 MHz) spectra of compound **S42** in DMSO-d<sub>6</sub>+CDCl<sub>3</sub>



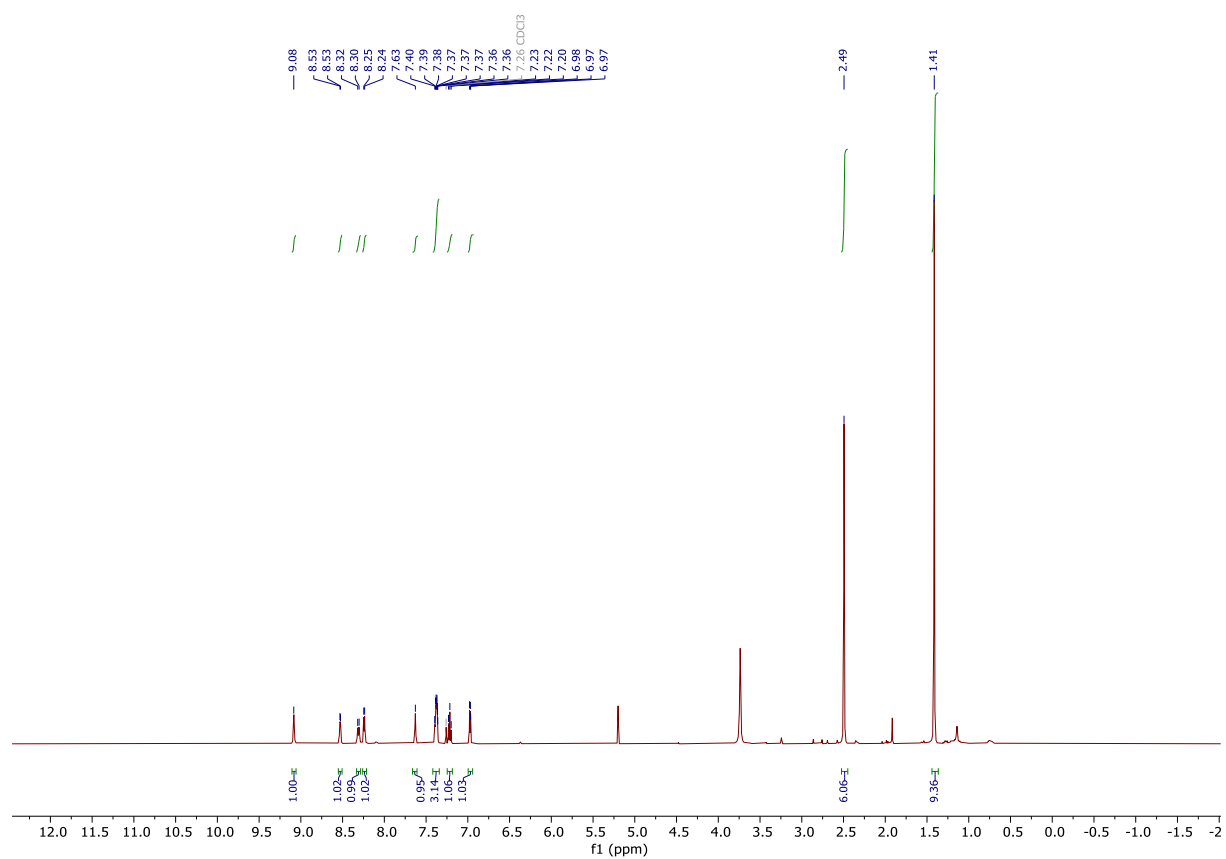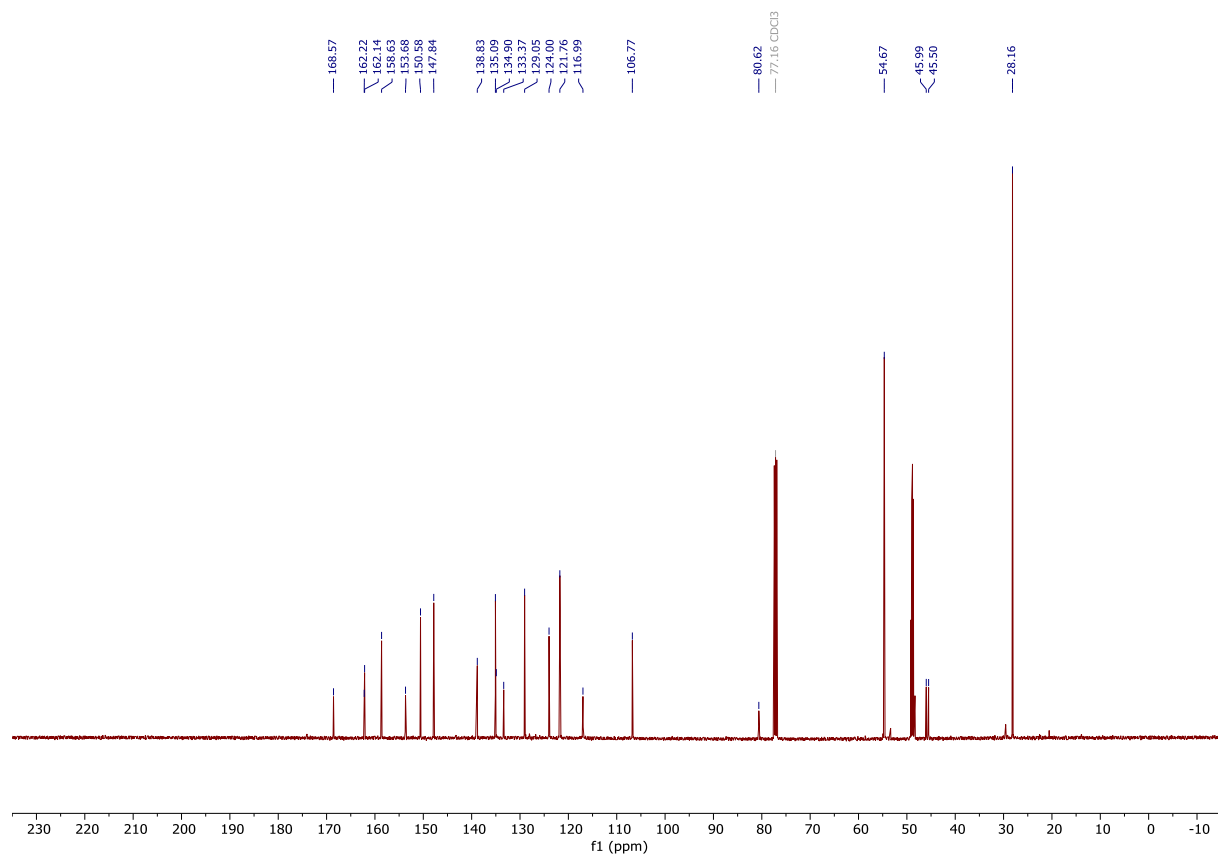

**Supplementary Fig. 57.** The  $^1\text{H}$ -NMR (500 MHz) and  $^{13}\text{C}$ -NMR (125 MHz) spectra of compound **S44** in  $\text{CDCl}_3$

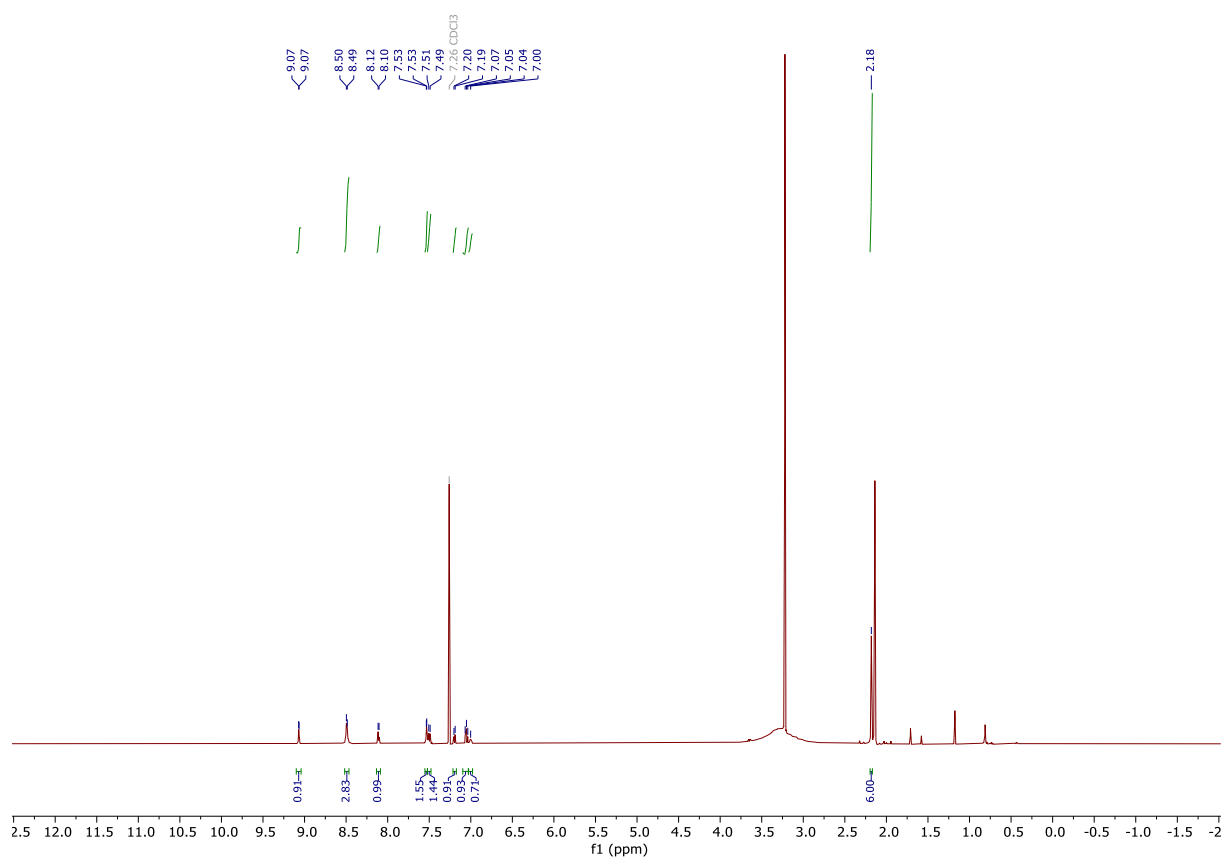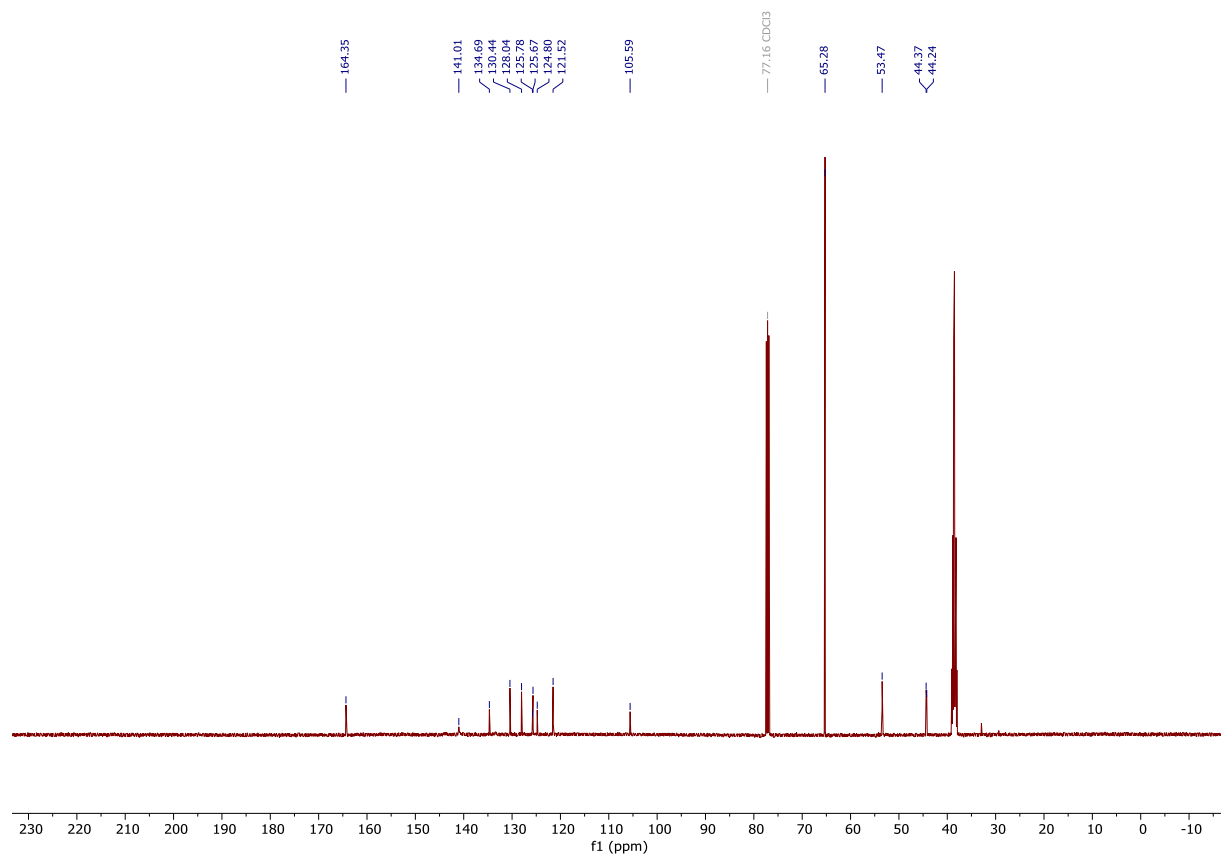

**Supplementary Fig. 58.** The <sup>1</sup>H-NMR (500 MHz) and <sup>13</sup>C-NMR (125 MHz) spectra of compound S45 in CDCl<sub>3</sub>+DMSO-d<sub>6</sub>

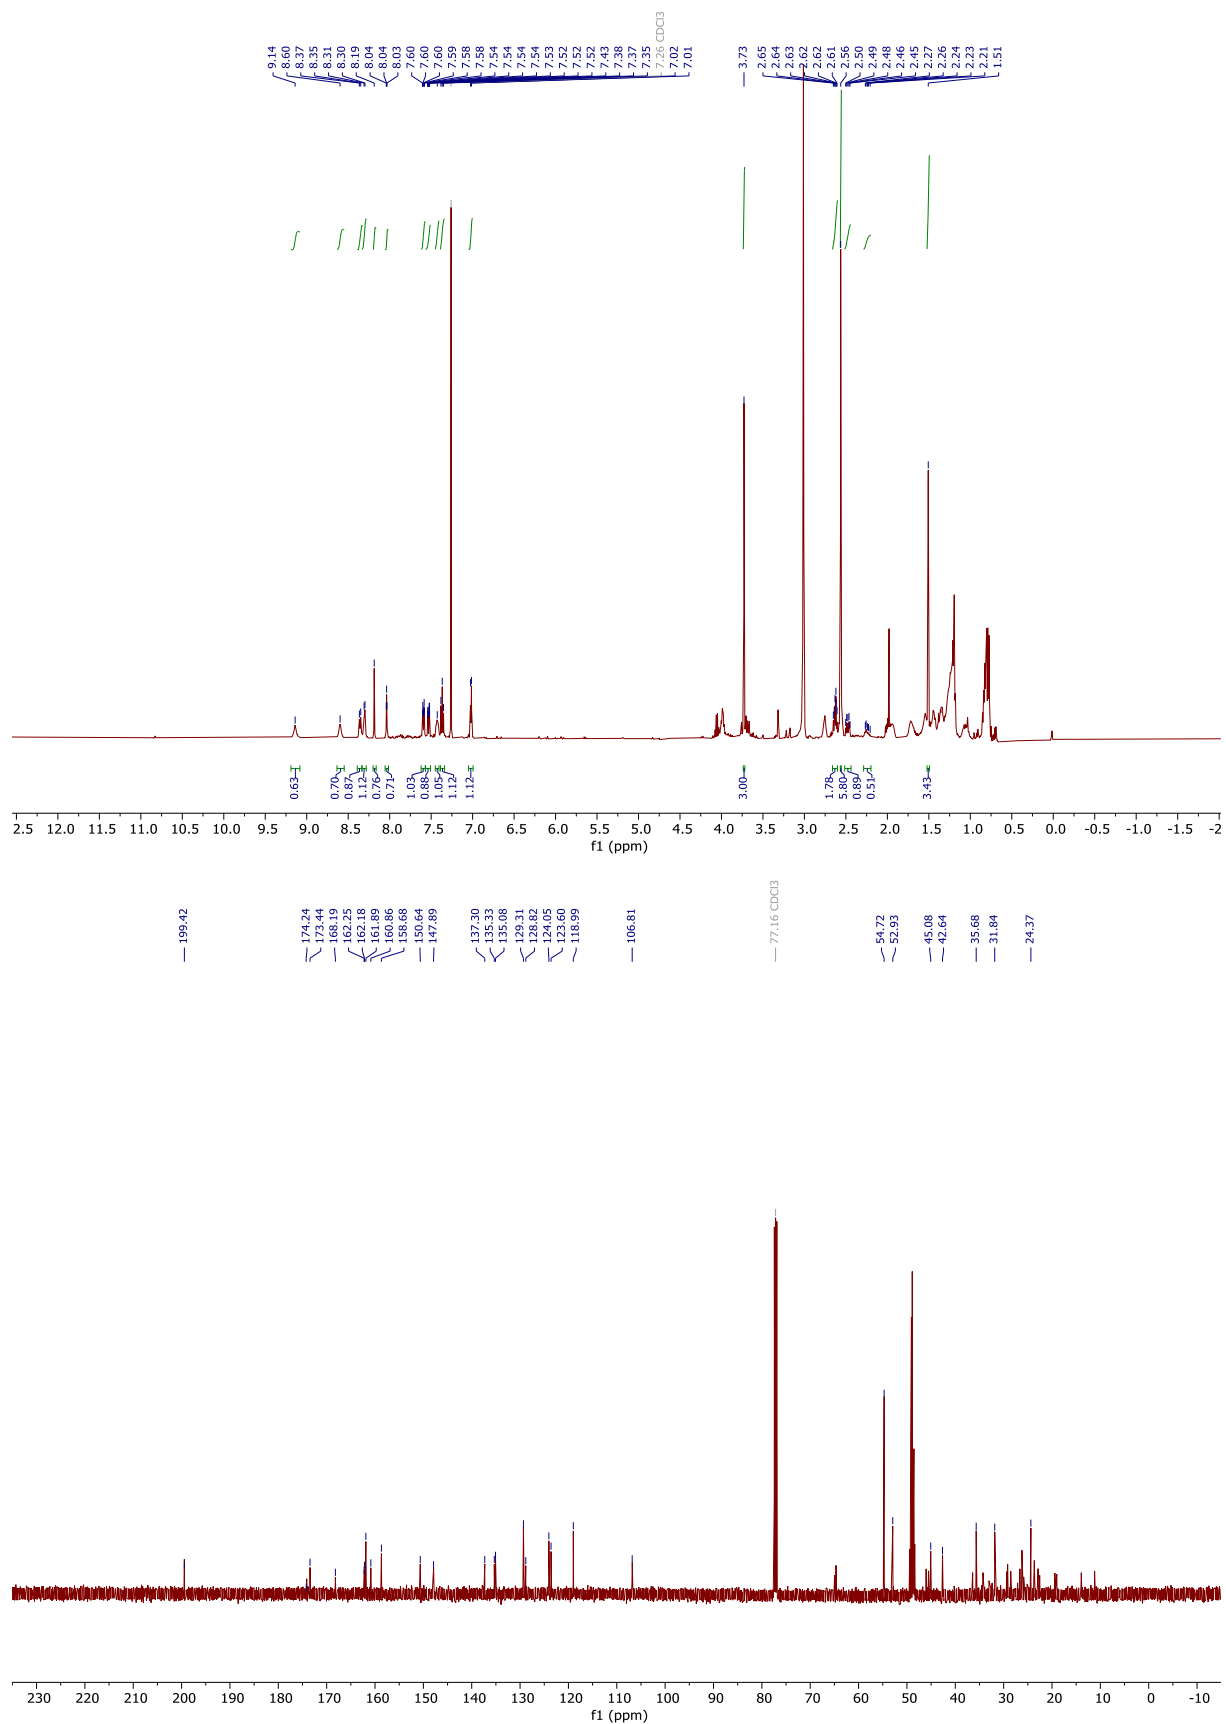

**Supplementary Fig. 59.** The <sup>1</sup>H-NMR (500 MHz) and <sup>13</sup>C-NMR (125 MHz) spectra of compound **1aR-isoPHEN** in CDCl<sub>3</sub>+CD<sub>3</sub>OD

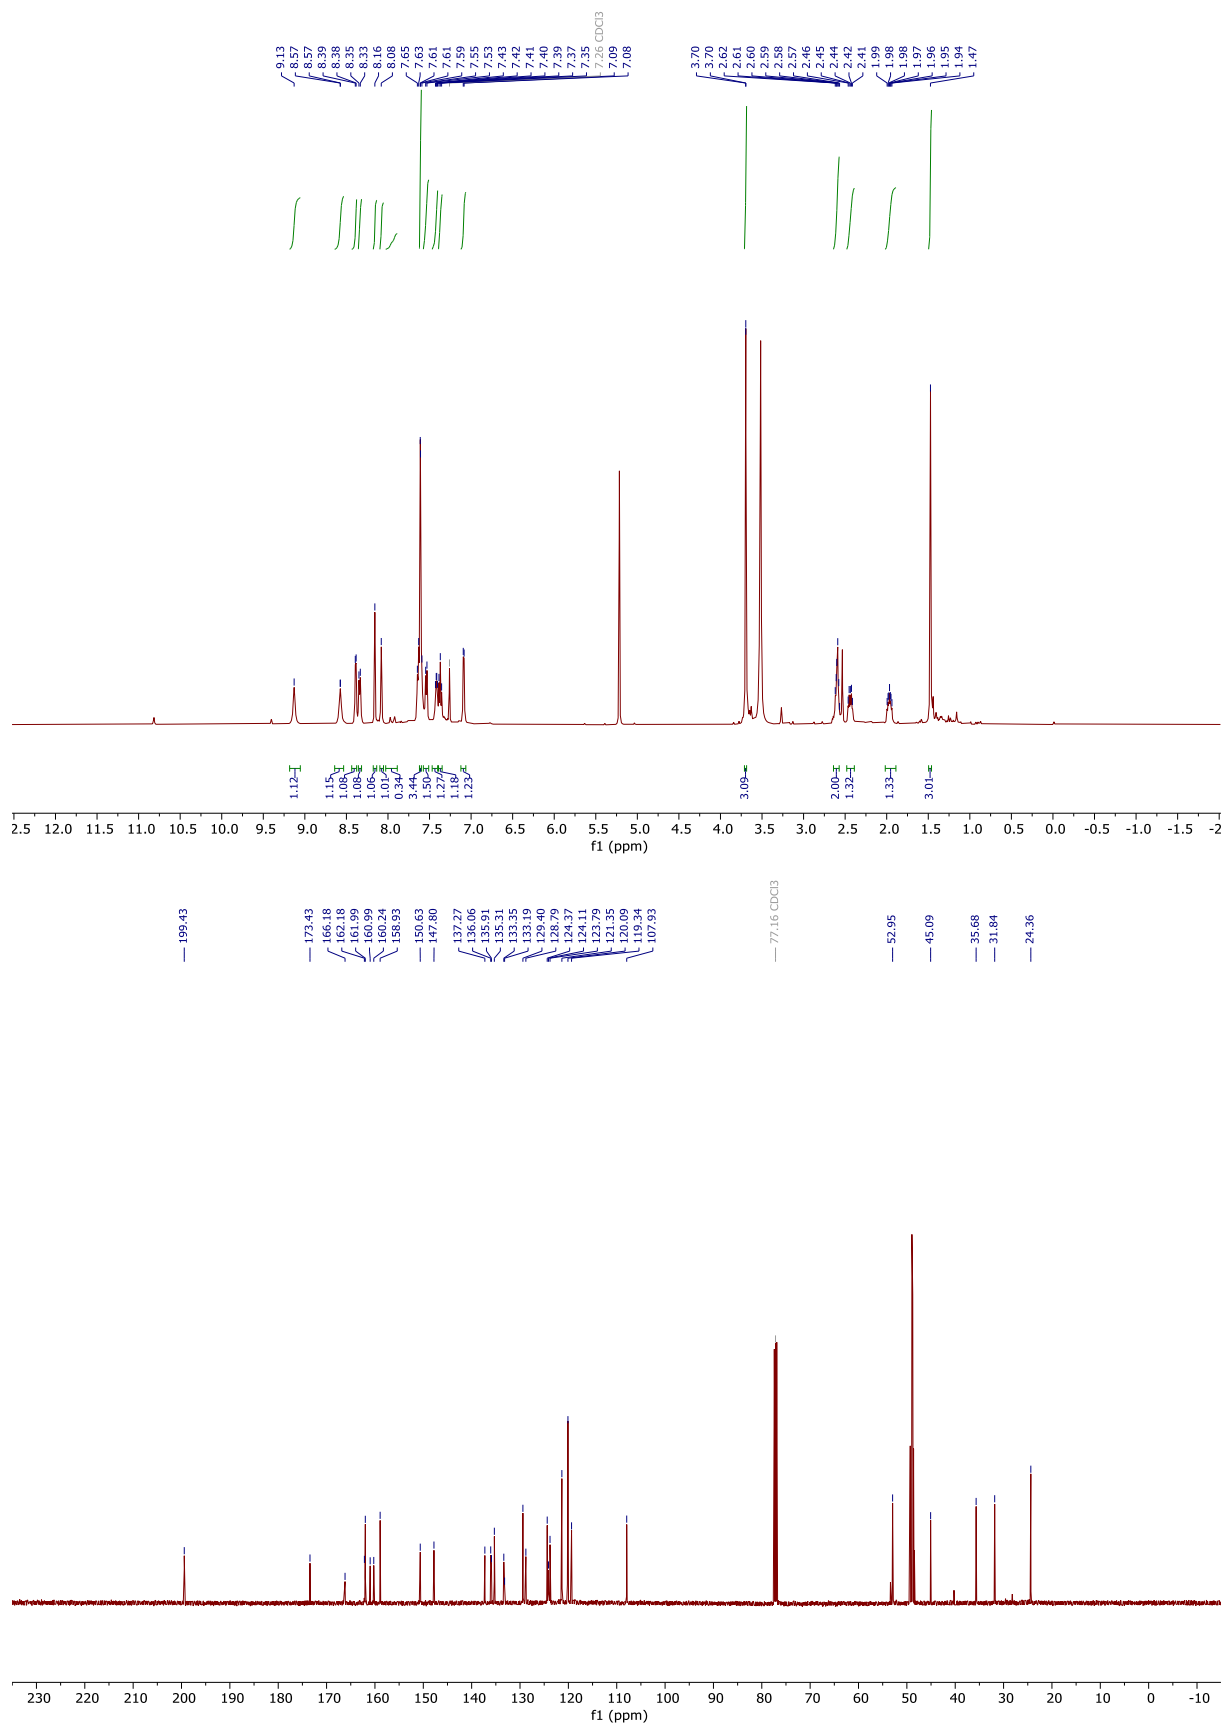

**Supplementary Fig. 60.** The <sup>1</sup>H-NMR (500 MHz) and <sup>13</sup>C-NMR (125 MHz) spectra of compound **1aR-IN-7** in CDCl<sub>3</sub>

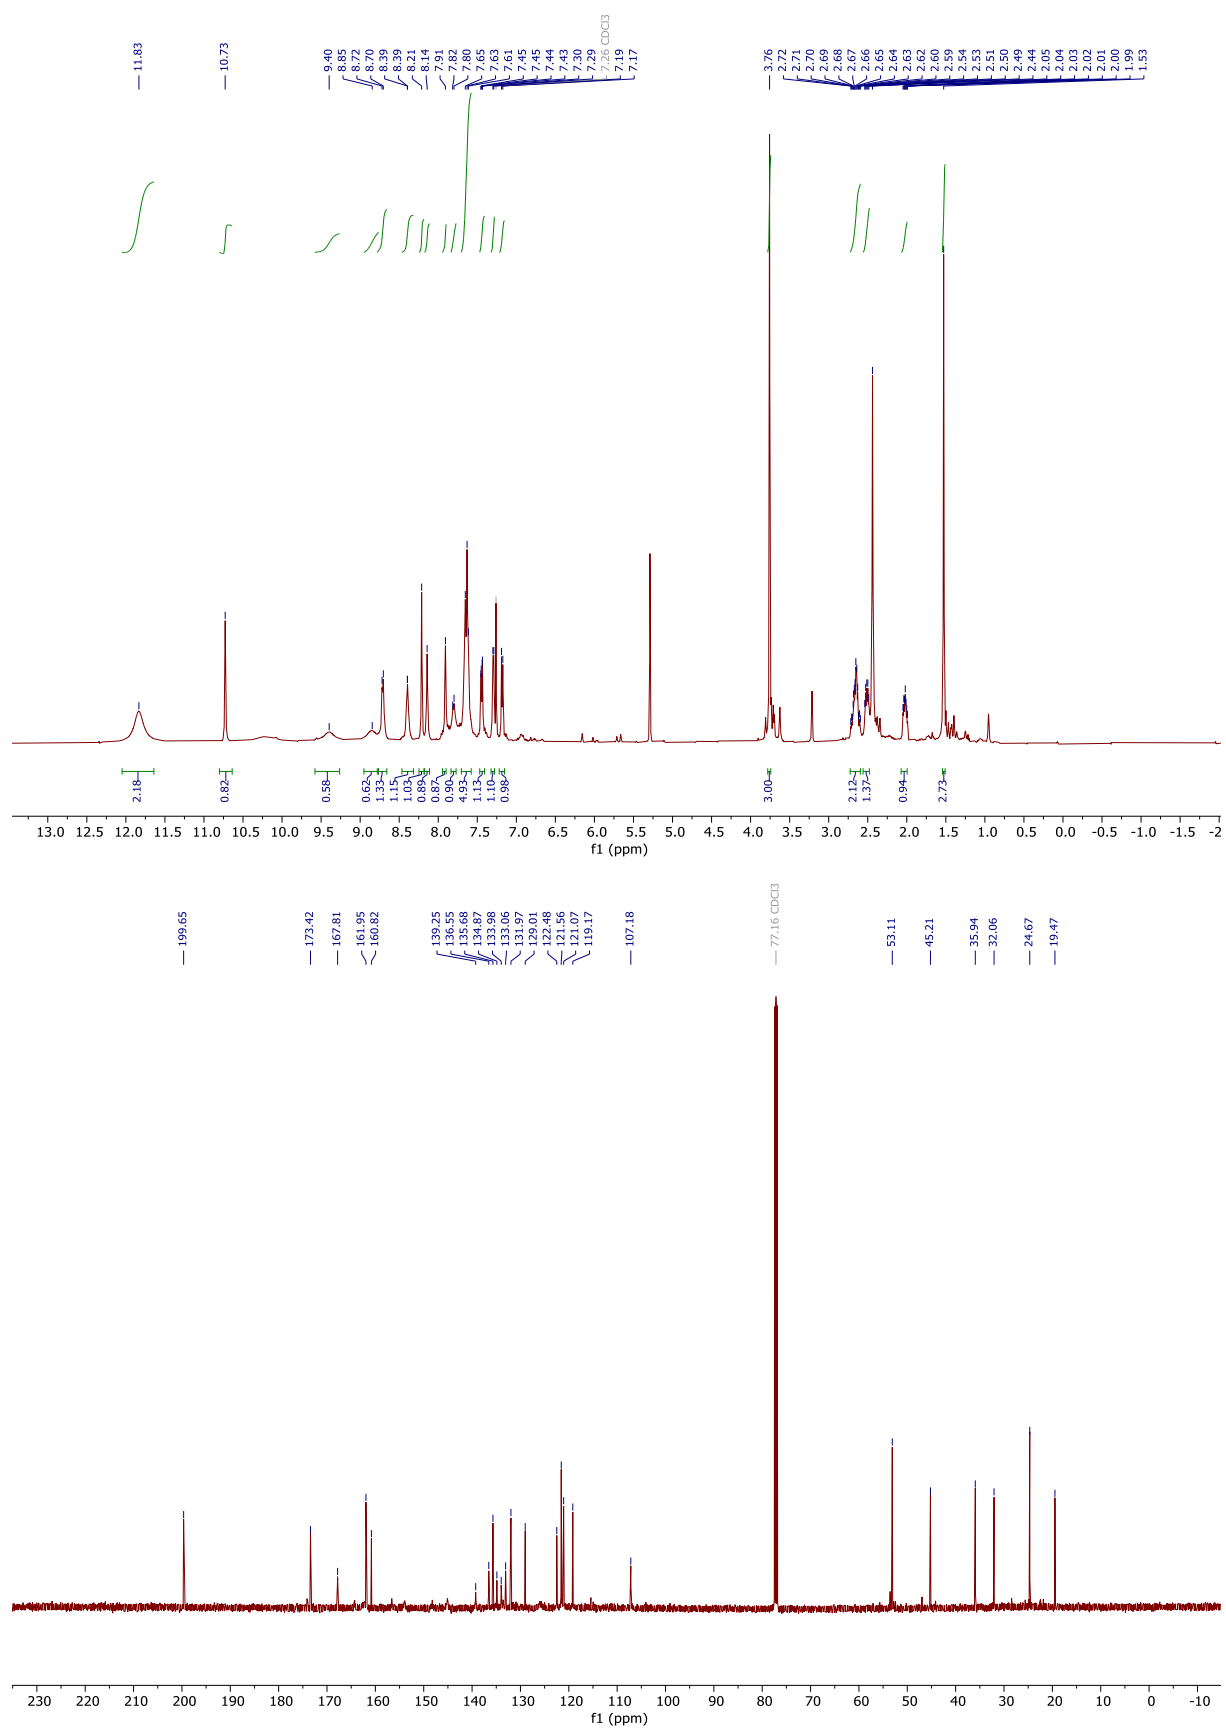

**Supplementary Fig. 61.** The <sup>1</sup>H-NMR (500 MHz) and <sup>13</sup>C-NMR (125 MHz) spectra of compound **1aR-IN-9** in CDCl<sub>3</sub>

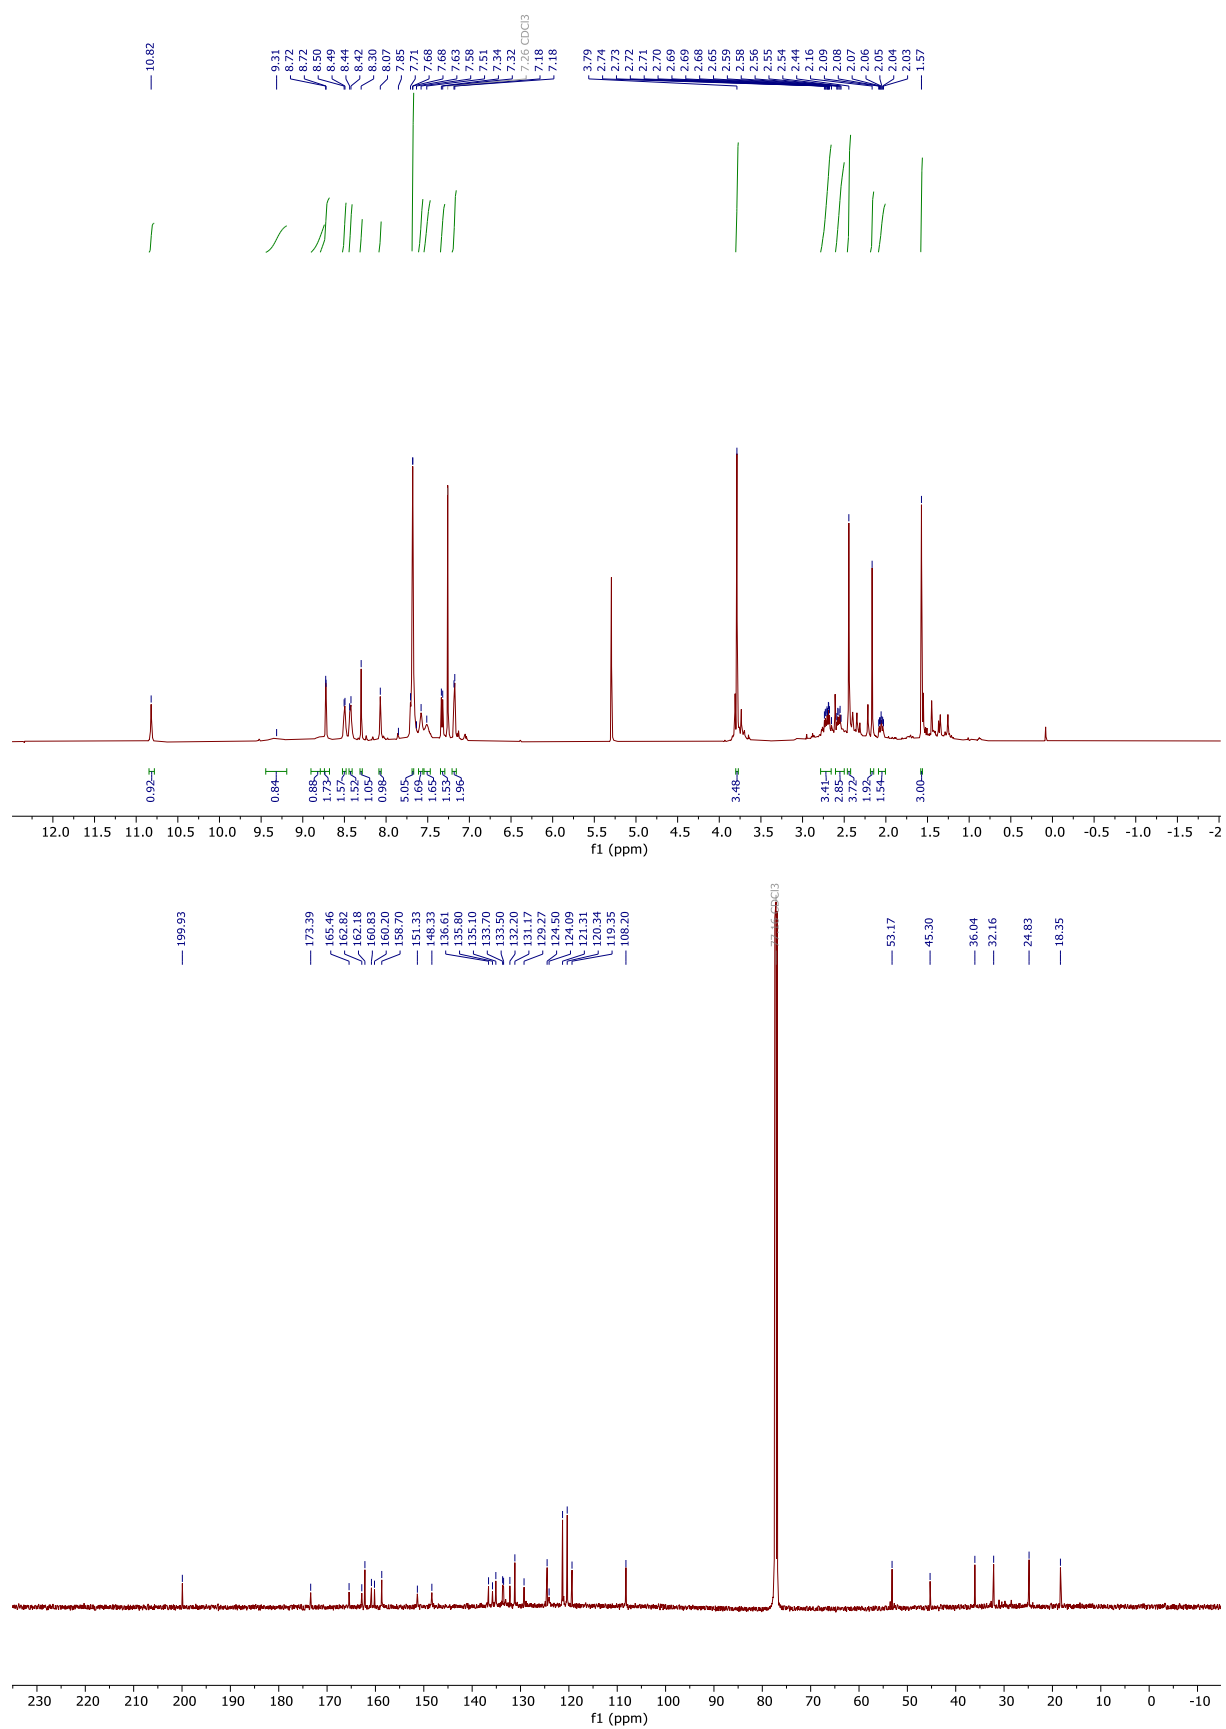

**Supplementary Fig. 62.** The <sup>1</sup>H-NMR (500 MHz) and <sup>13</sup>C-NMR (125 MHz) spectra of compound **1aR-IN-10** in CDCl<sub>3</sub>

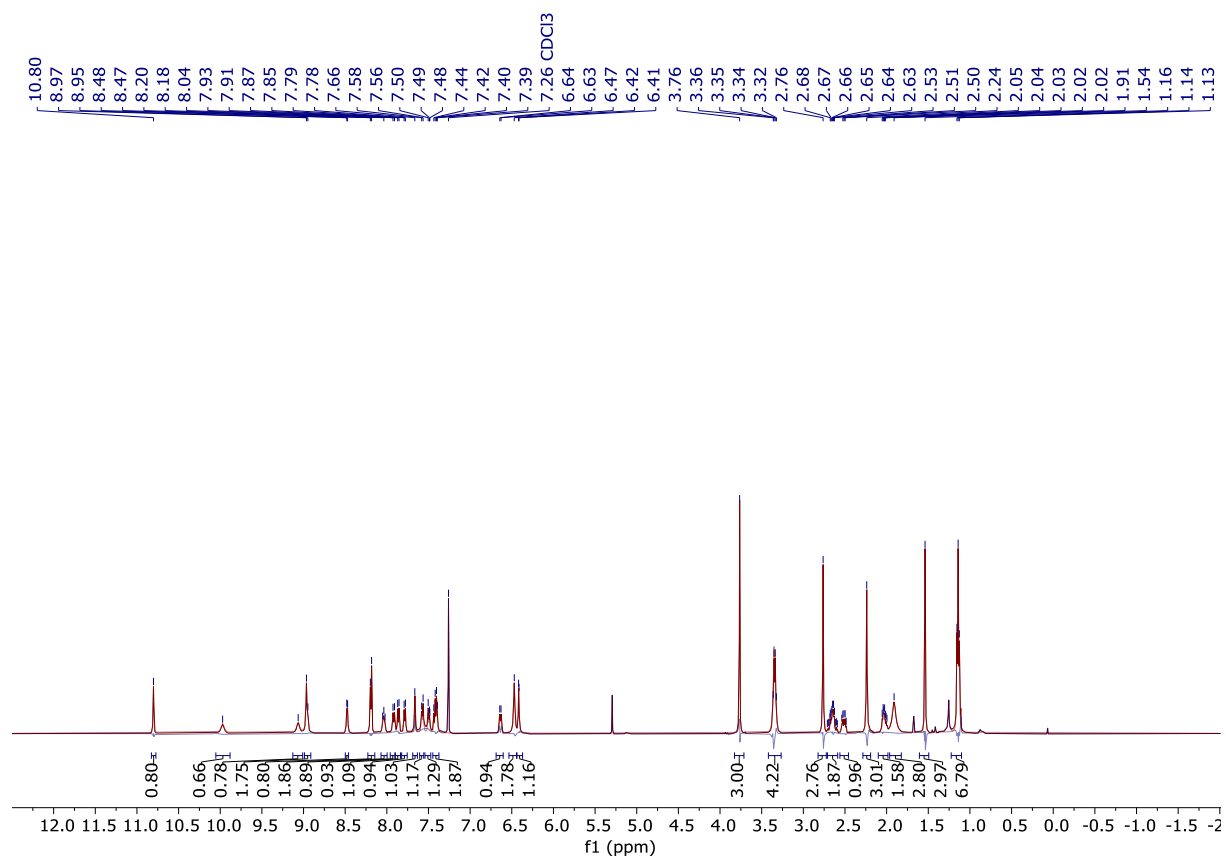

**Supplementary Fig. 63.** The <sup>1</sup>H-NMR (500 MHz) spectrum of compound **Photocaged 1aR-IN-8** in CDCl<sub>3</sub>

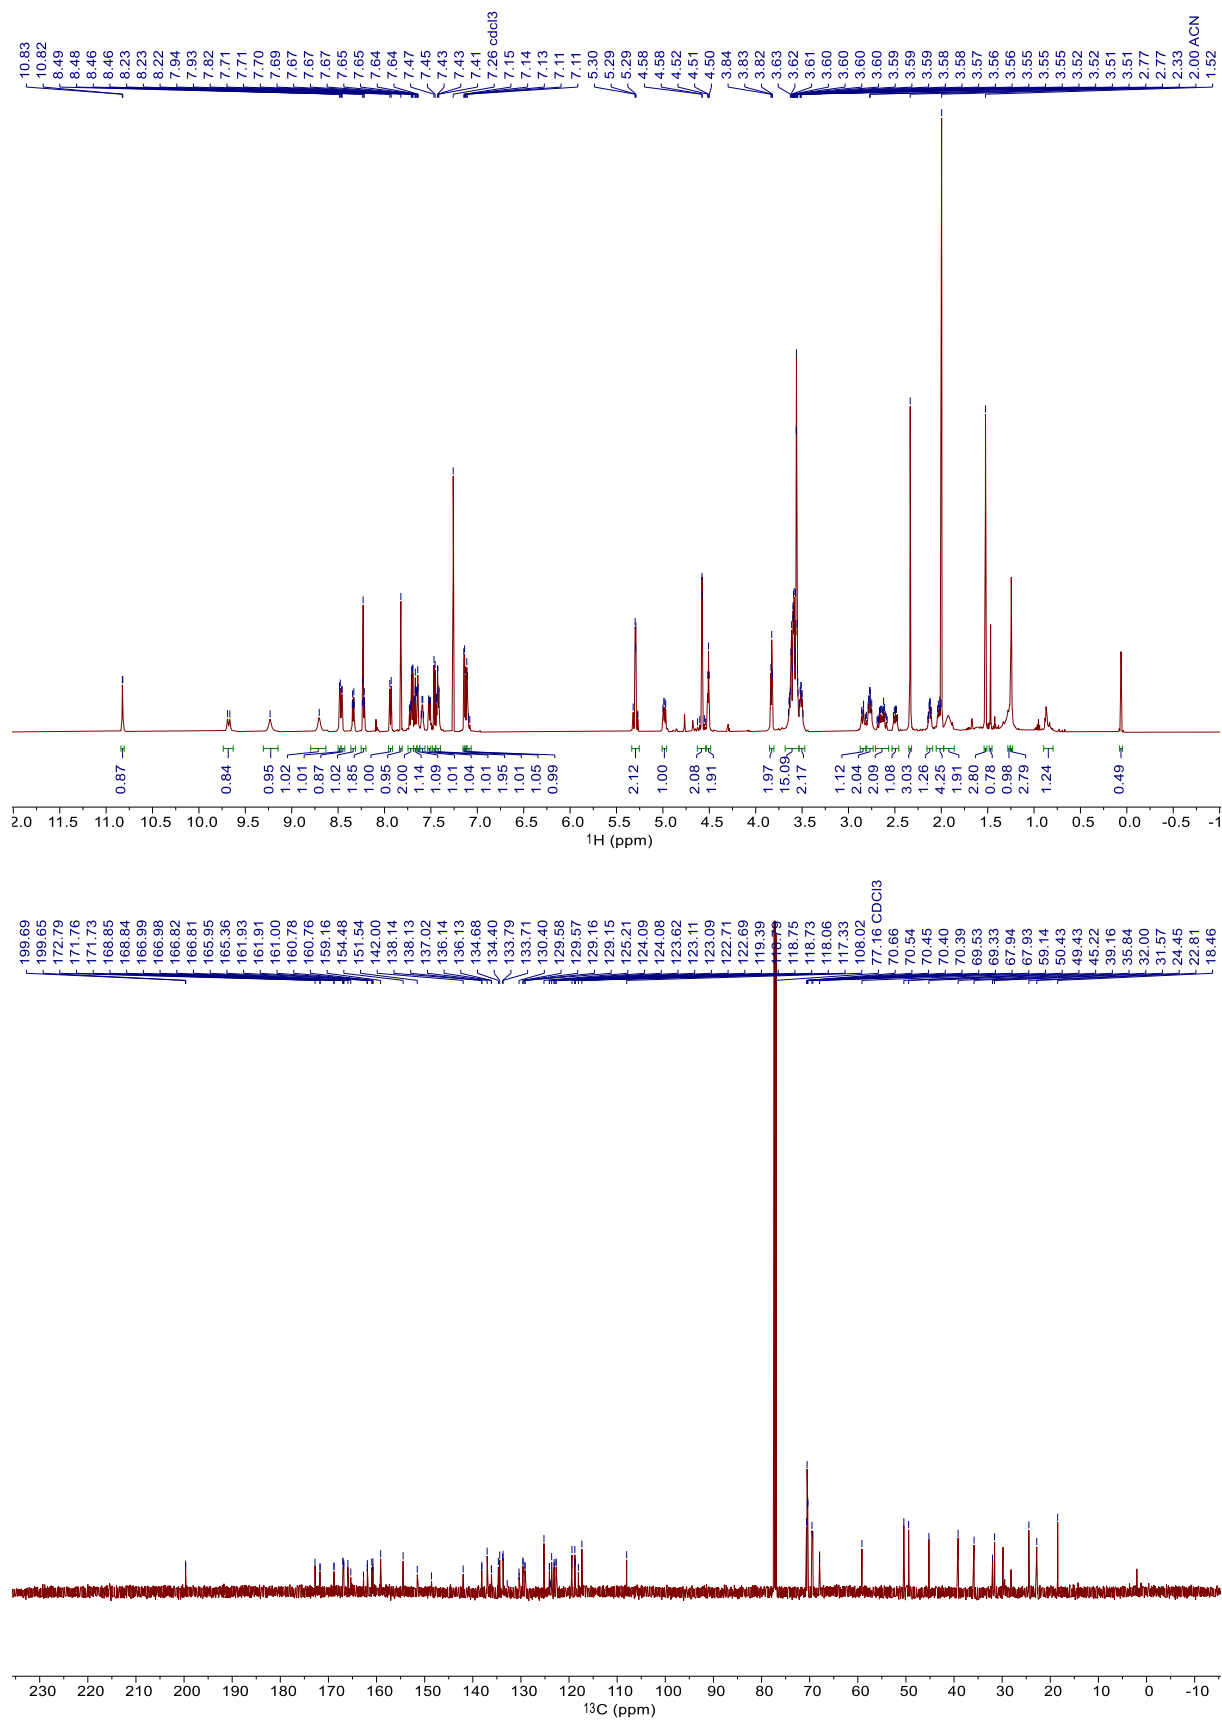

**Supplementary Fig. 64.** The <sup>1</sup>H-NMR (600 MHz) and <sup>13</sup>C-NMR (151 MHz) spectra of compound **PRT\_1** in CDCl<sub>3</sub>



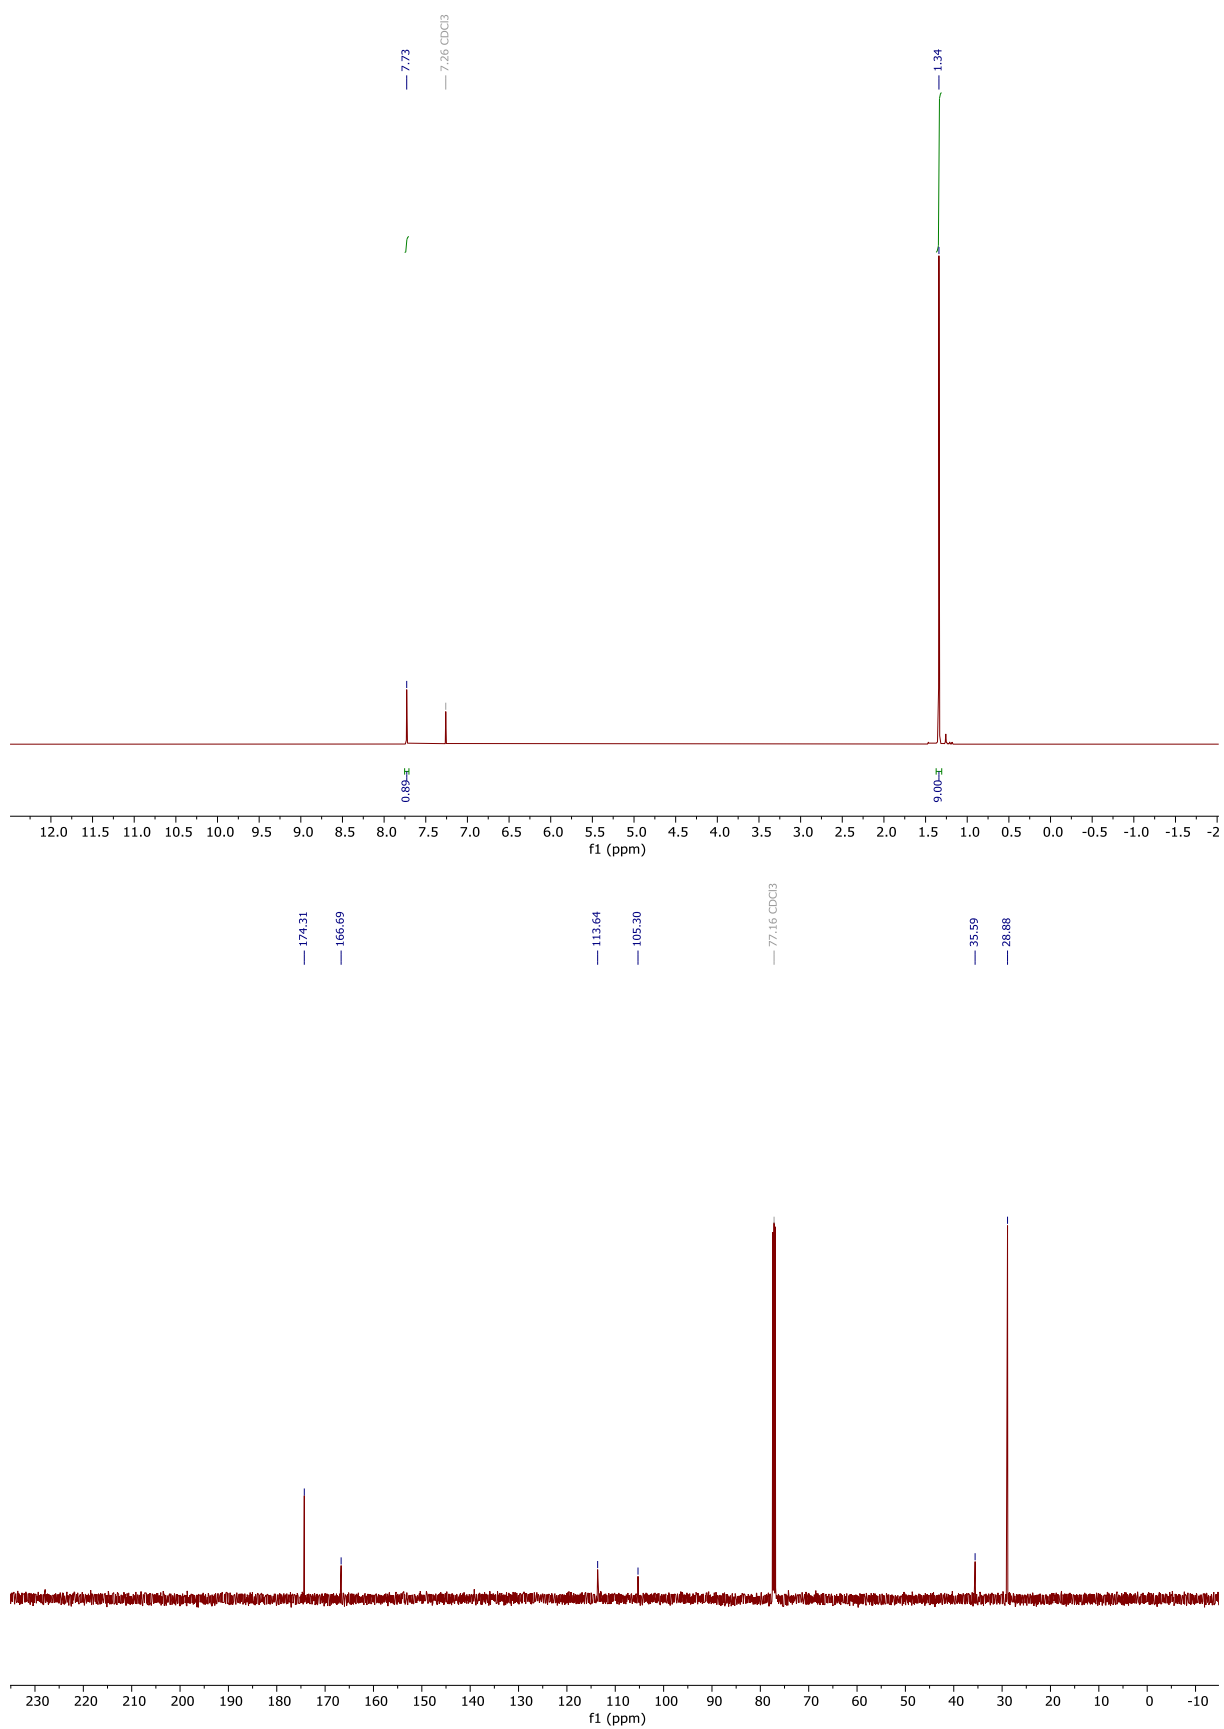

**Supplementary Fig. 65.** The <sup>1</sup>H-NMR (500 MHz) and <sup>13</sup>C-NMR (125 MHz) spectra of compound **S48** in CDCl<sub>3</sub>



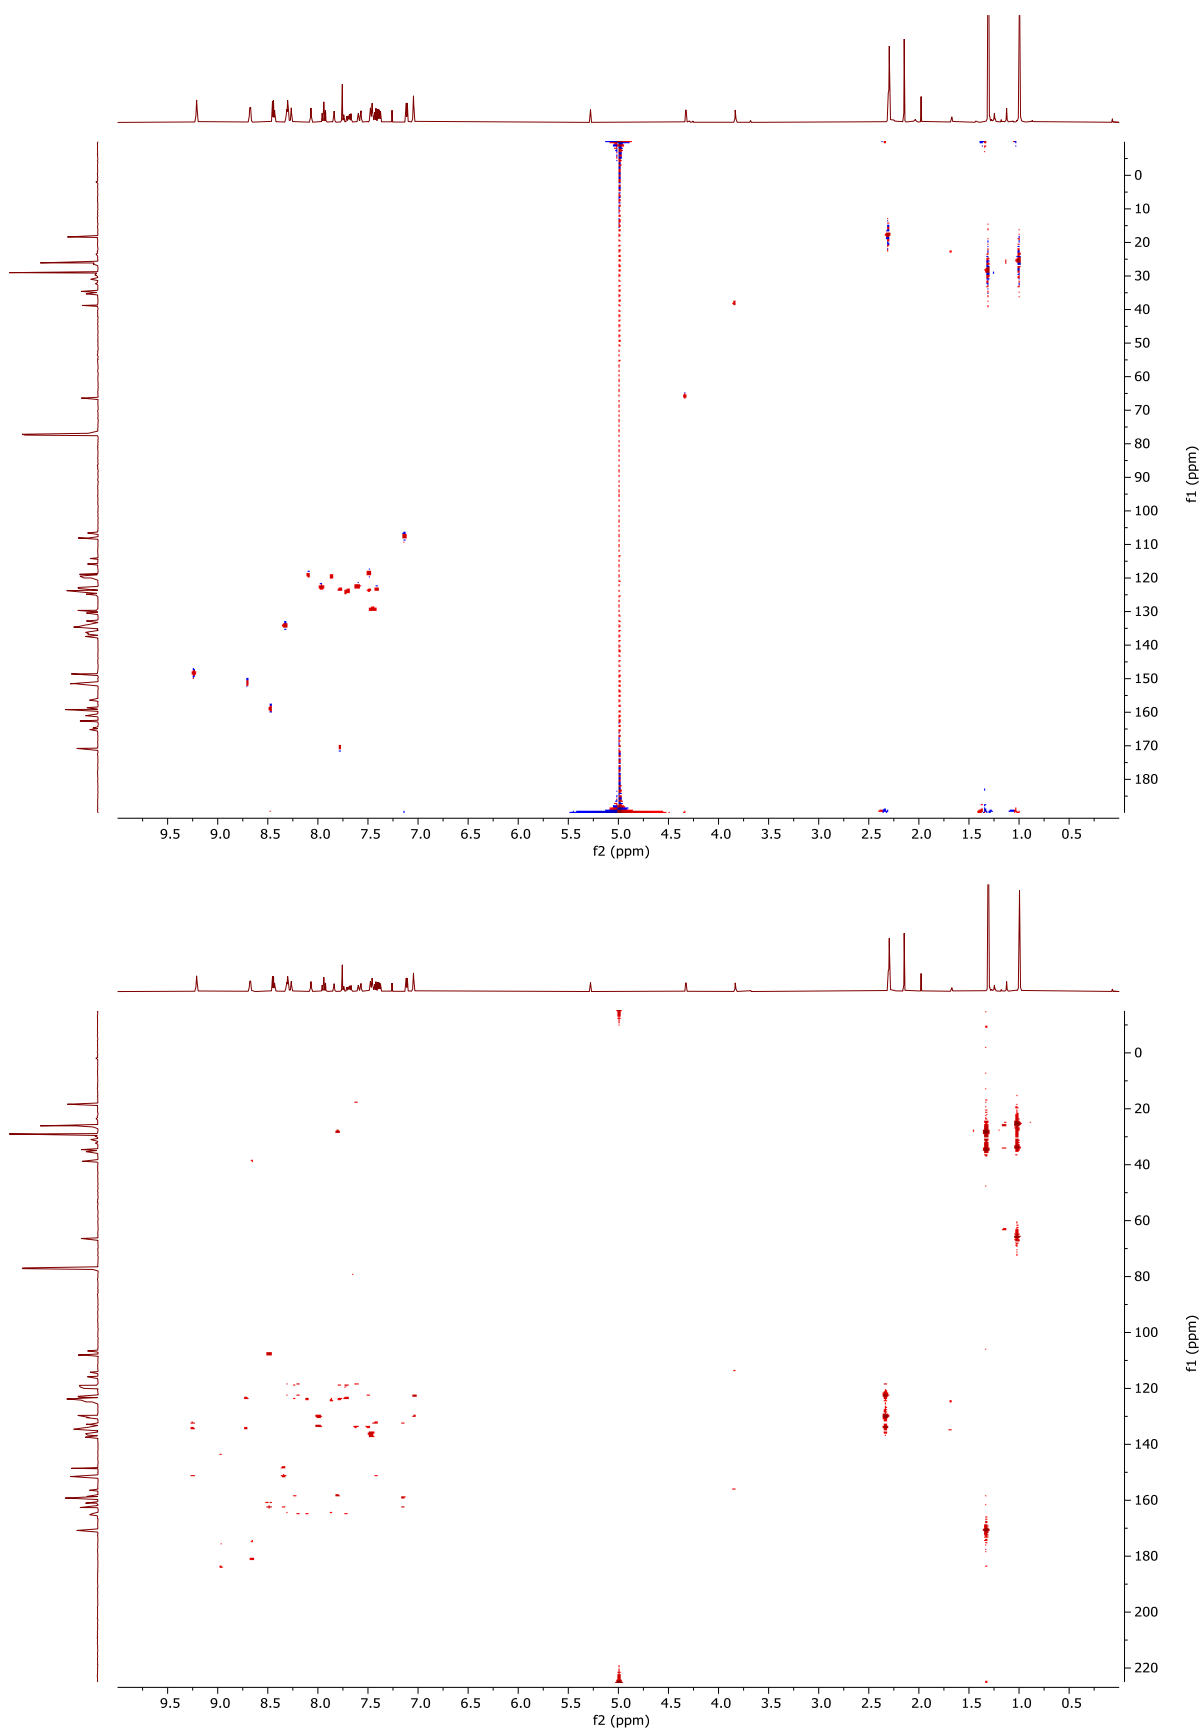

**Supplementary Fig. 67.** The HSQC and HMBC spectra of compound **CA-IN-8** in  $\text{CDCl}_3$

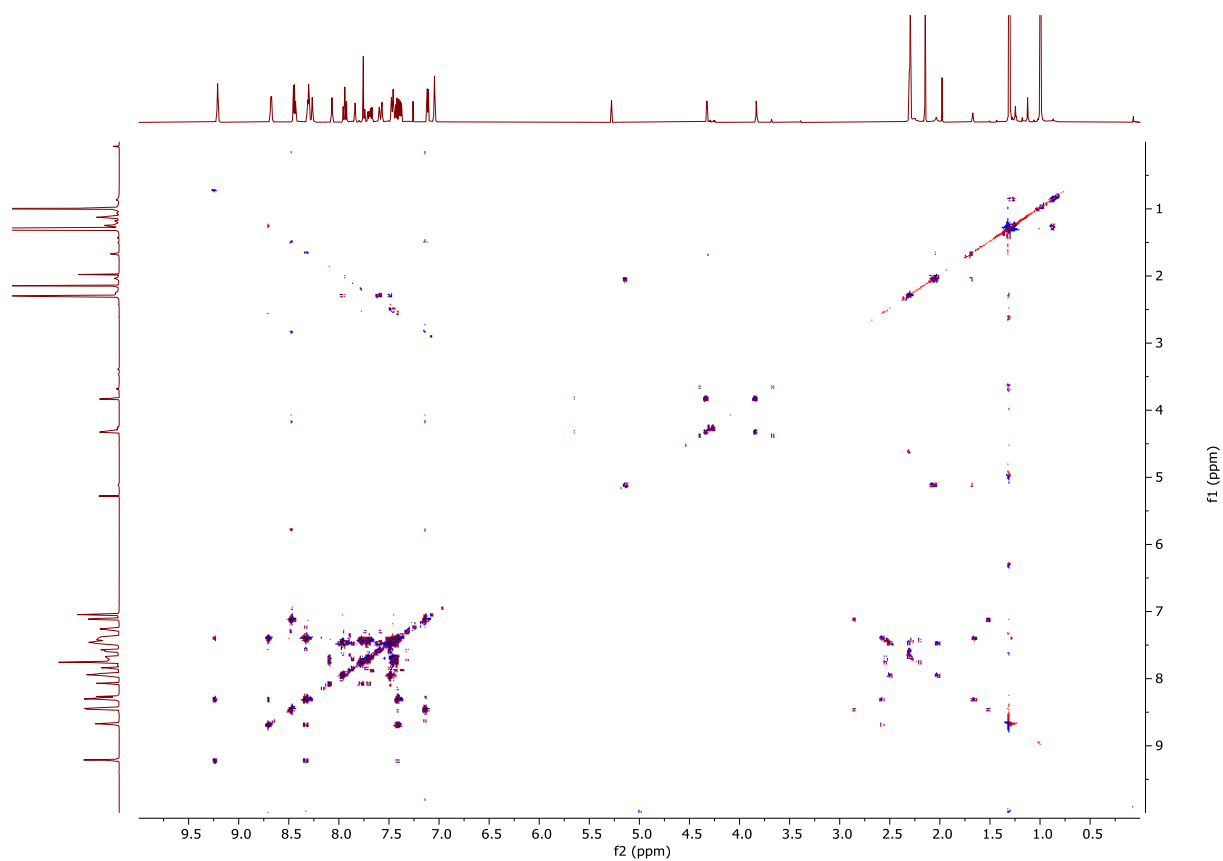

**Supplementary Fig. 68.** The COSY spectrum of compound **CA-IN-8** in  $\text{CDCl}_3$

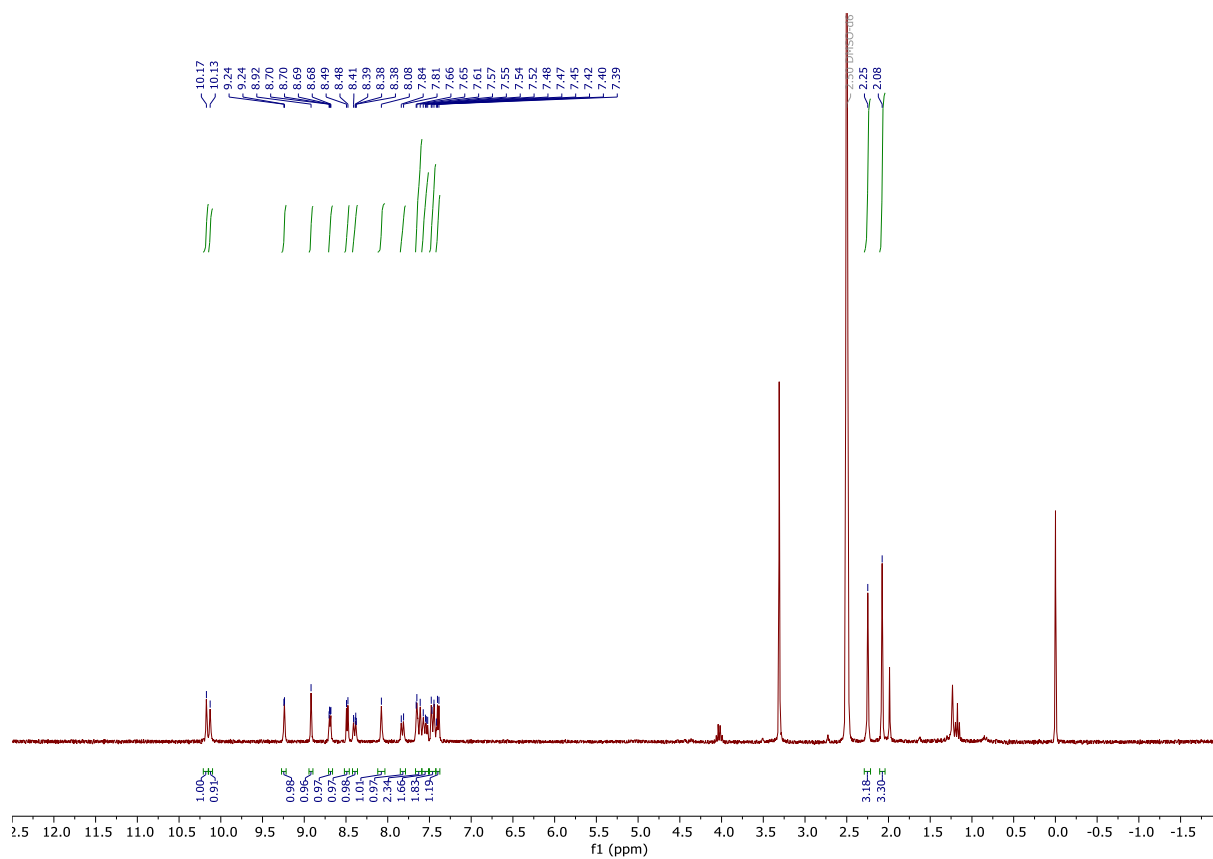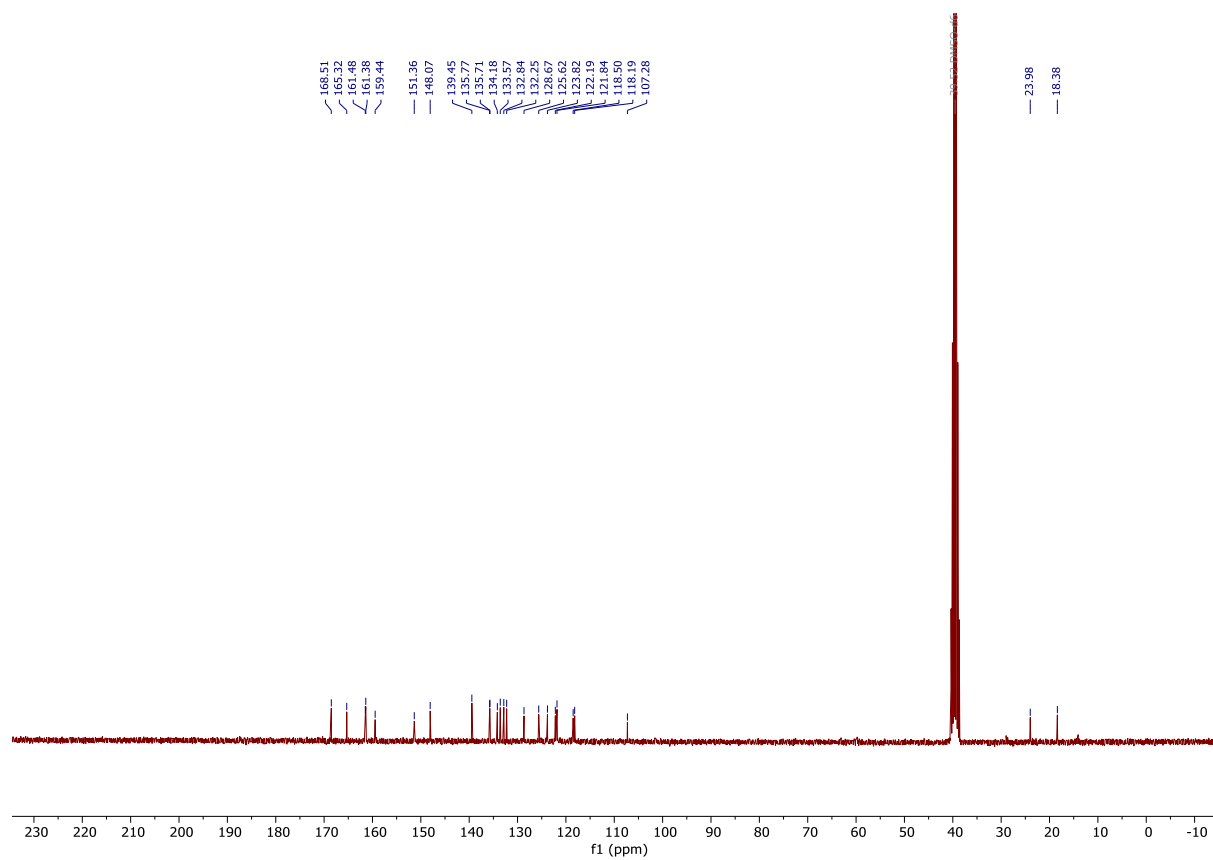

**Supplementary Fig. 69.** The  $^1\text{H}$ -NMR (500 MHz) and  $^{13}\text{C}$ -NMR (125 MHz) spectra of compound **IN-8a** in  $\text{CDCl}_3$

## High-performance liquid chromatography chromatograms

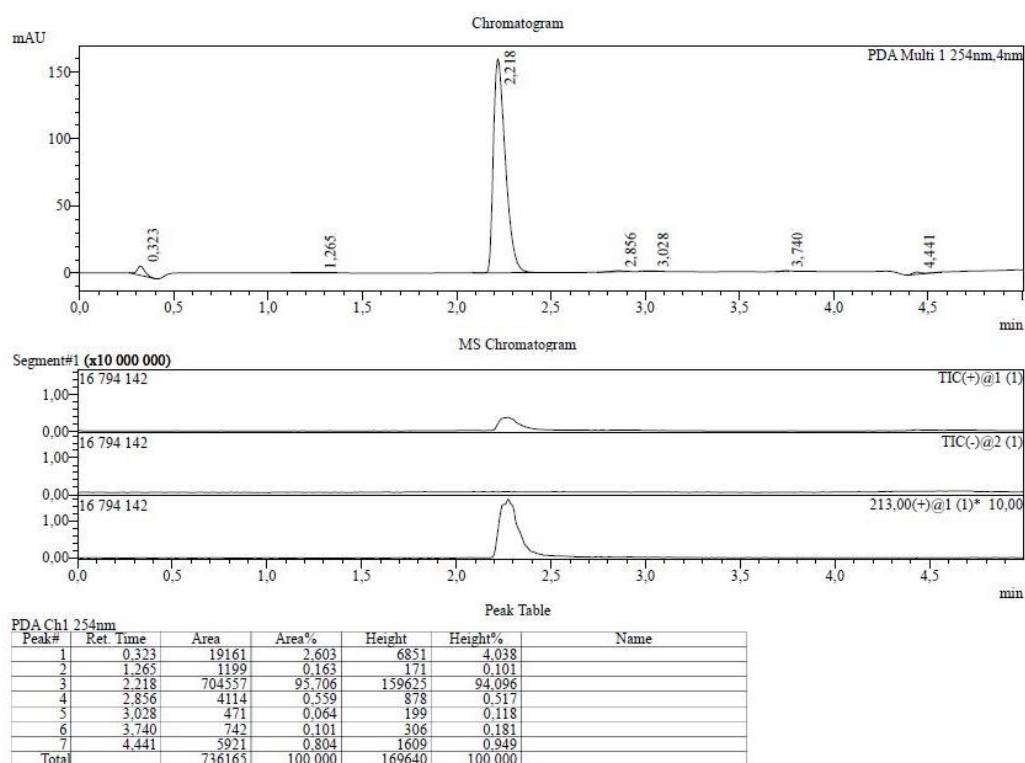

**Supplementary Fig. 70.** The high-performance liquid chromatography chromatogram of compound S4/S4R/S4S

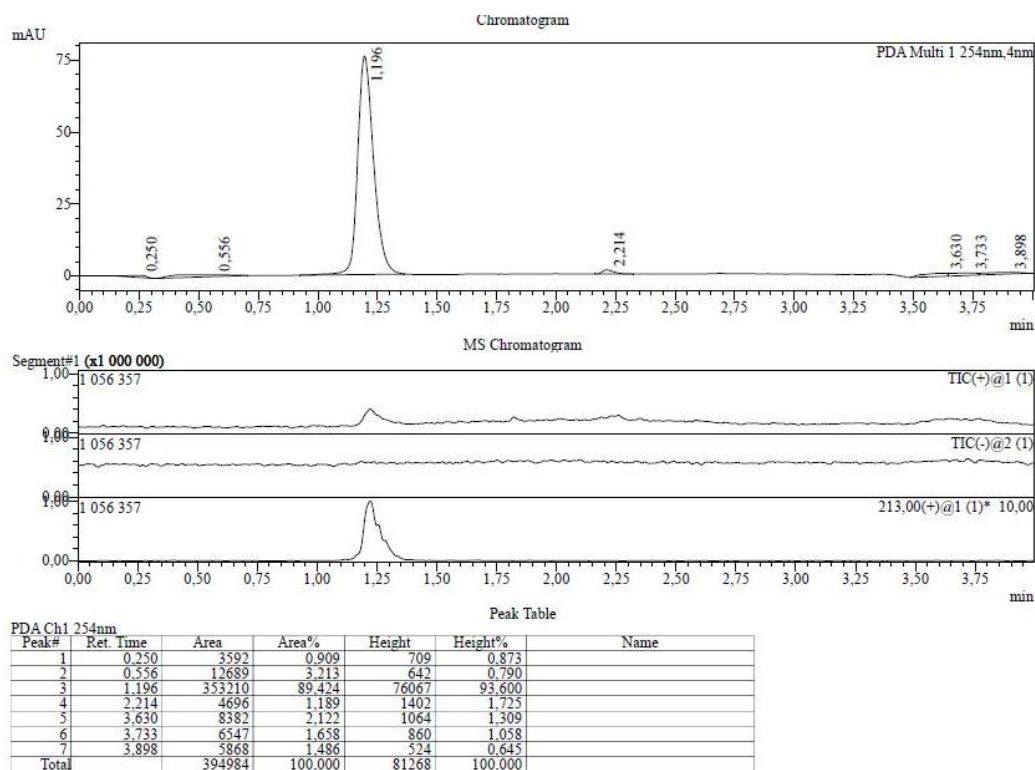

**Supplementary Fig. 71.** The high-performance liquid chromatography chromatogram of compound S5/S5R/S5S

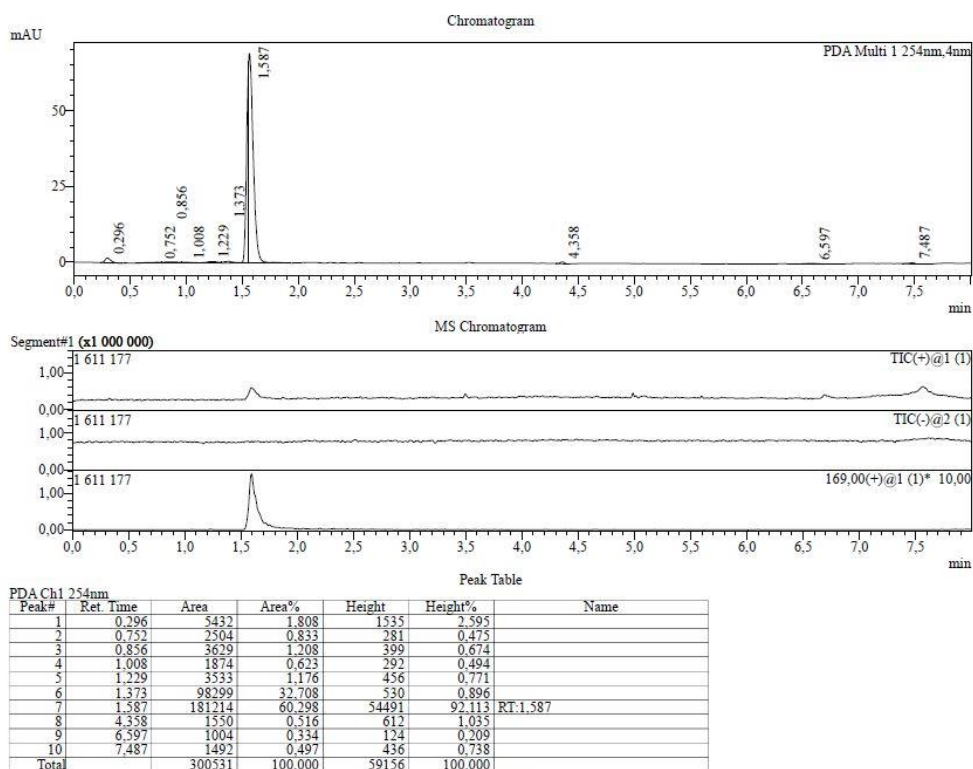

**Supplementary Fig. 72.** The high-performance liquid chromatography chromatogram of compound **S8**

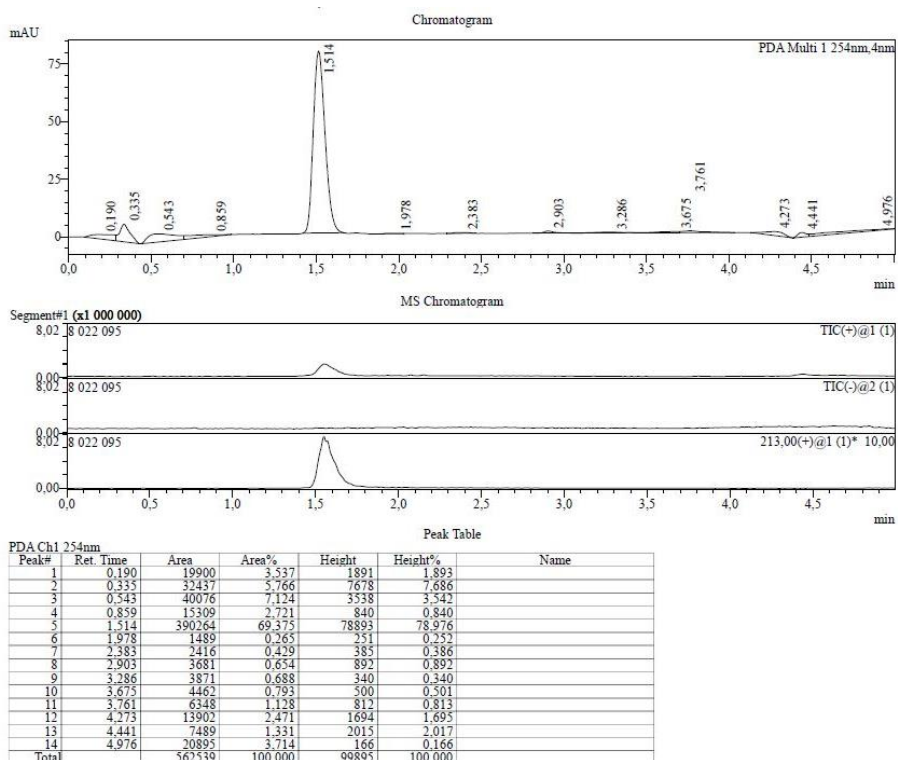

**Supplementary Fig. 73.** The high-performance liquid chromatography chromatogram of compound **S9**

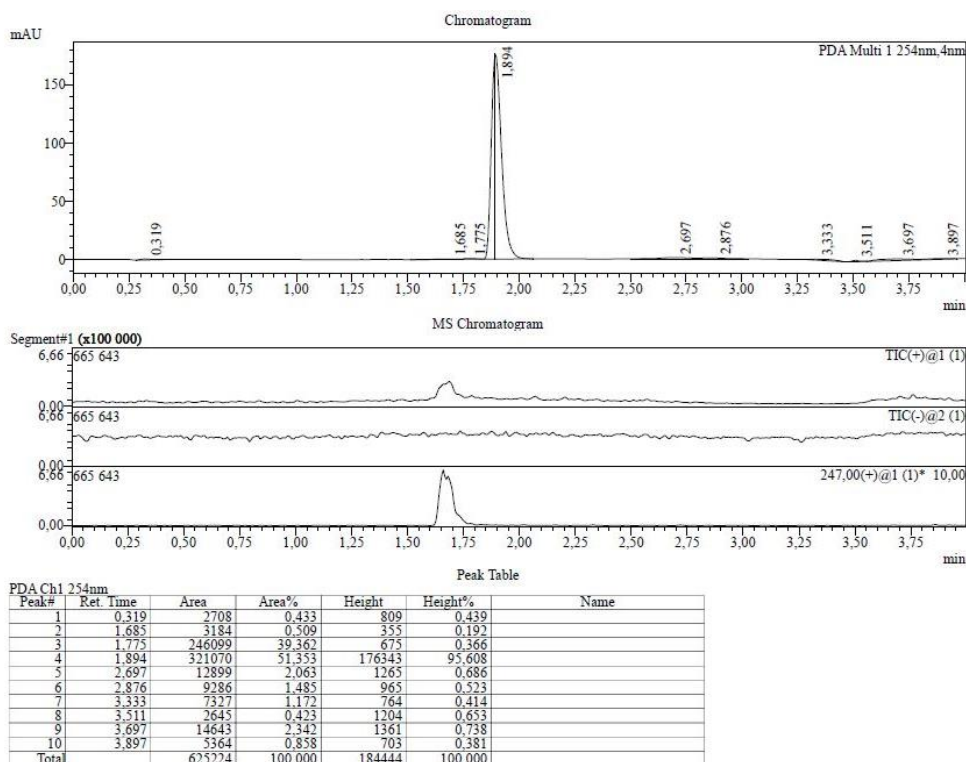

**Supplementary Fig. 74.** The high-performance liquid chromatography chromatogram of compound S11

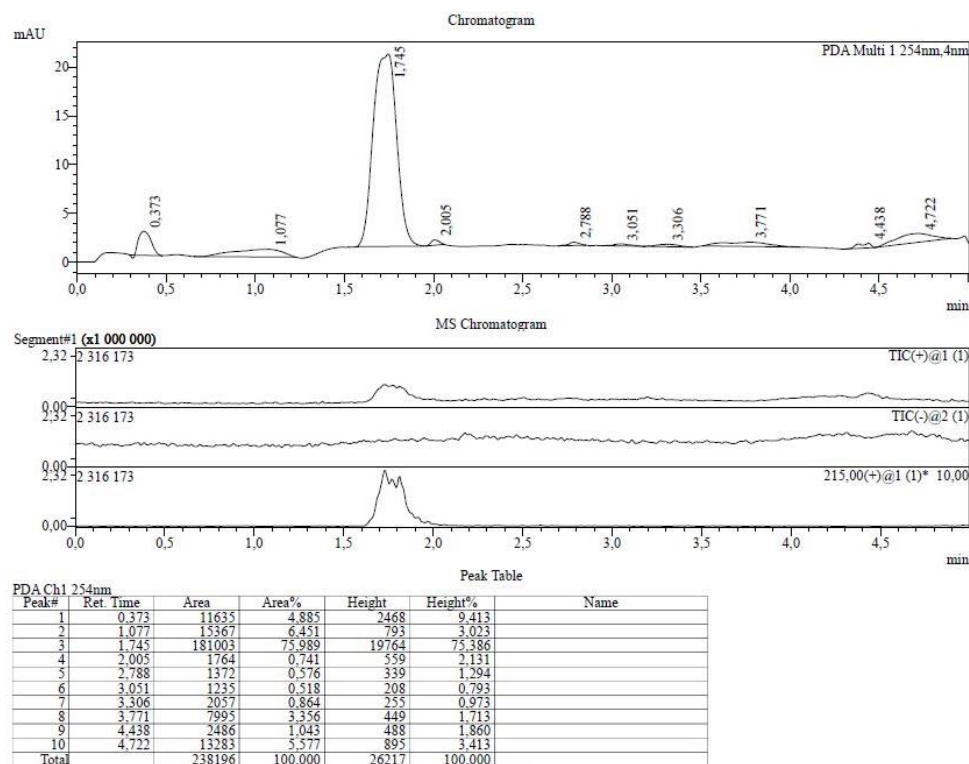

**Supplementary Fig. 75.** The high-performance liquid chromatography chromatogram of compound S12



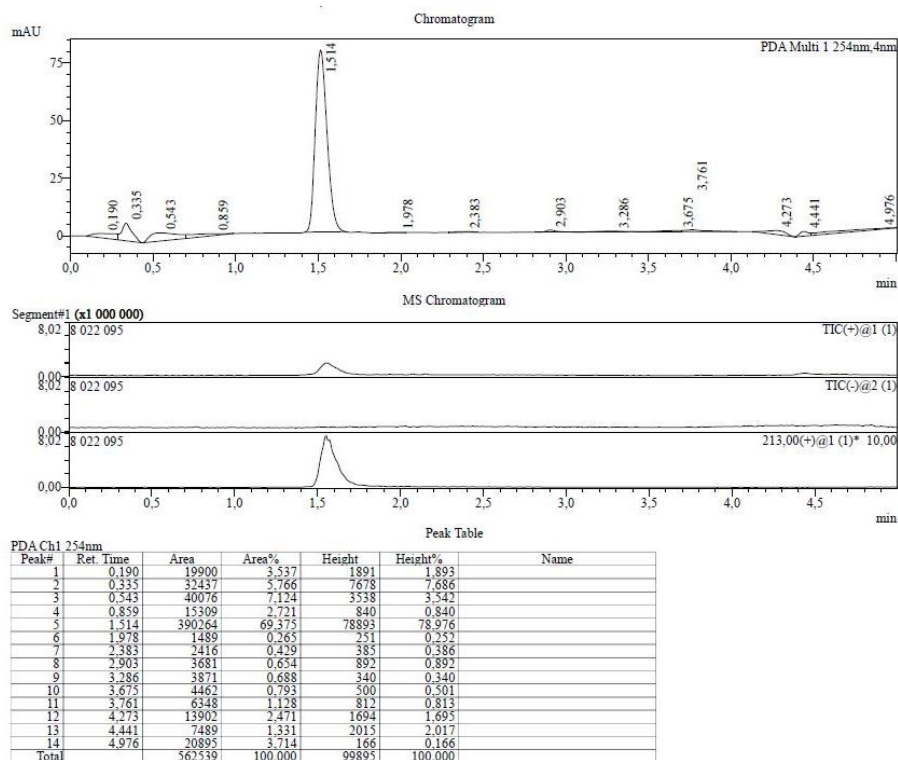

**Supplementary Fig. 76.** The high-performance liquid chromatography chromatogram of compound S14

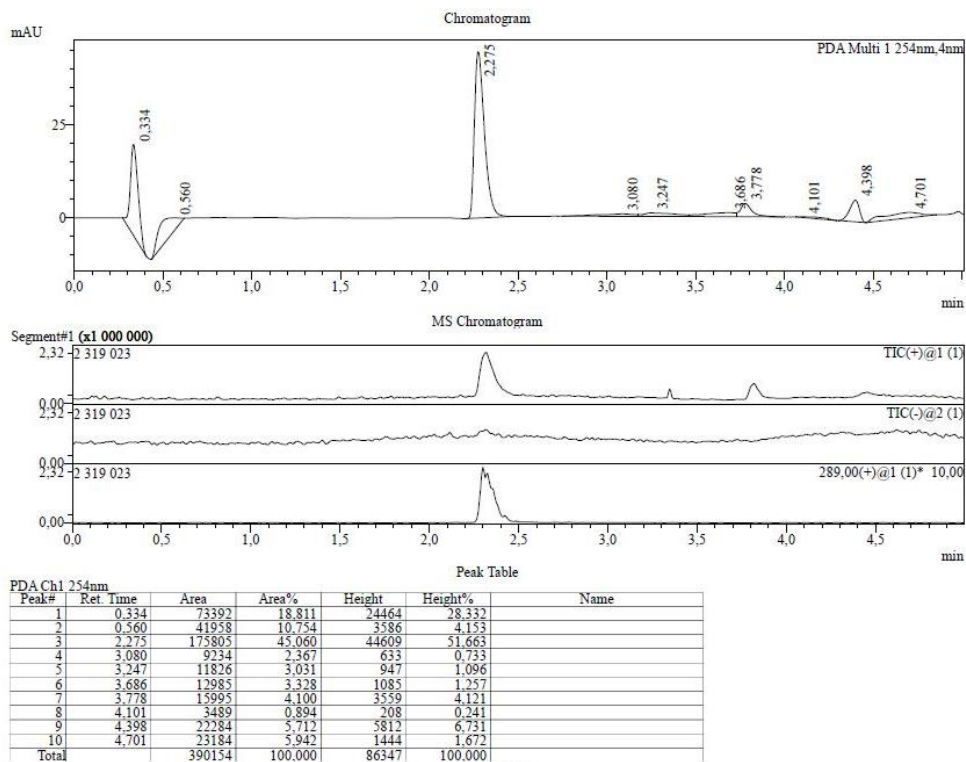

**Supplementary Fig. 77.** The high-performance liquid chromatography chromatogram of compound S15

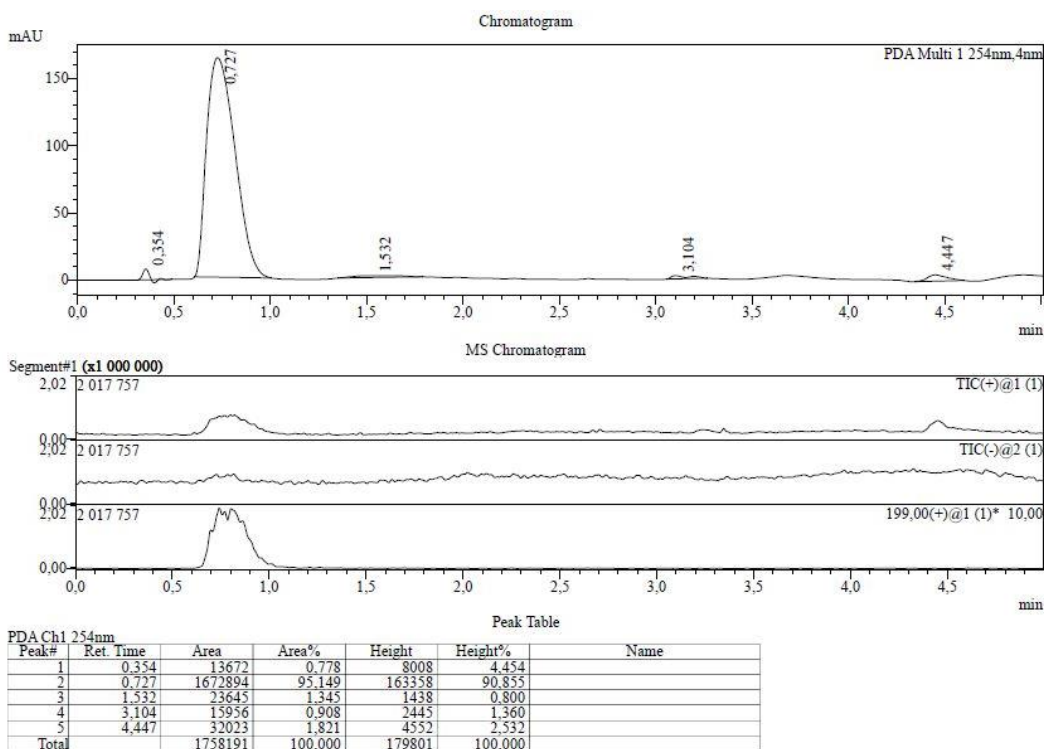

**Supplementary Fig. 78.** The high-performance liquid chromatography chromatogram of compound **S16**

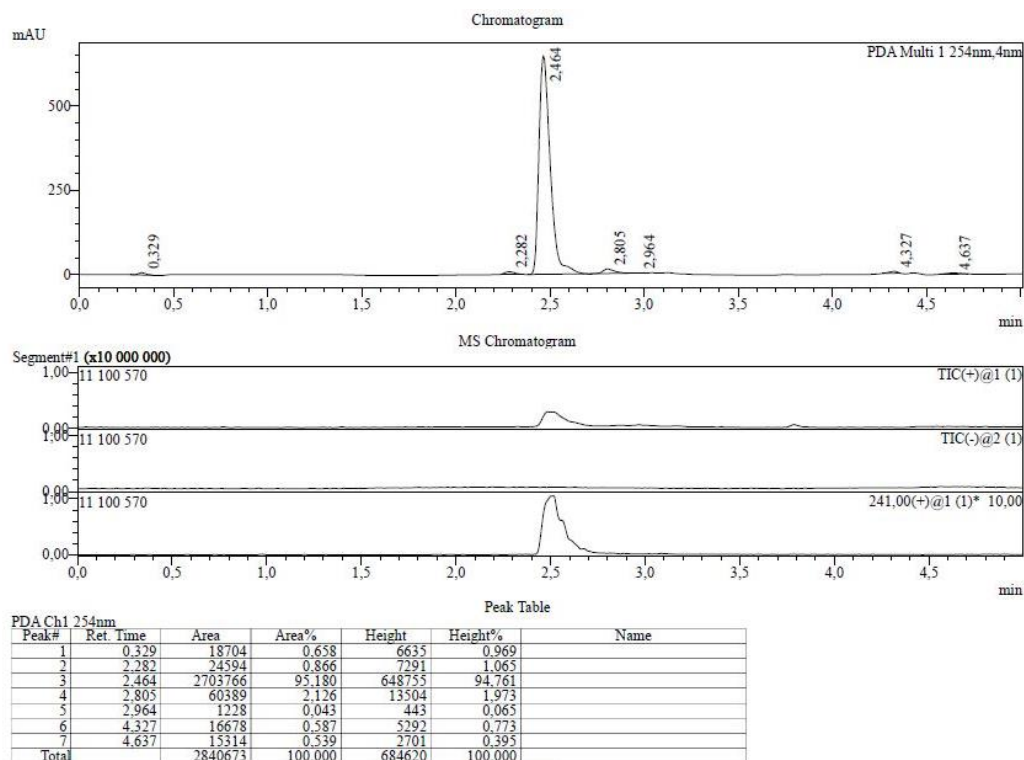

**Supplementary Fig. 79.** The high-performance liquid chromatography chromatogram of compound **S17R/S17S**

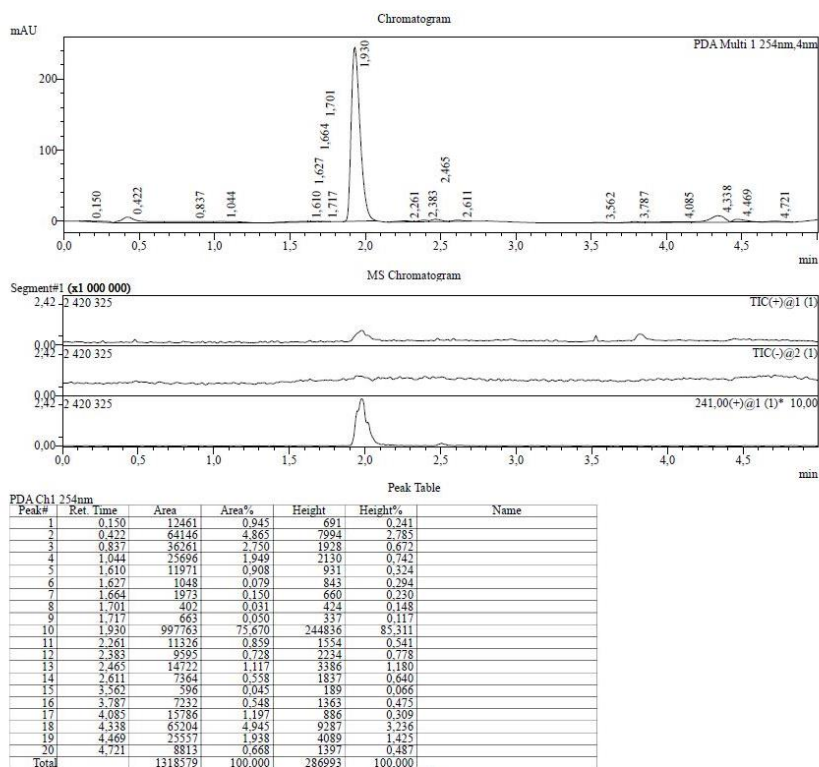

**Supplementary Fig. 80.** The high-performance liquid chromatography chromatogram of compound **S18R/S18S**

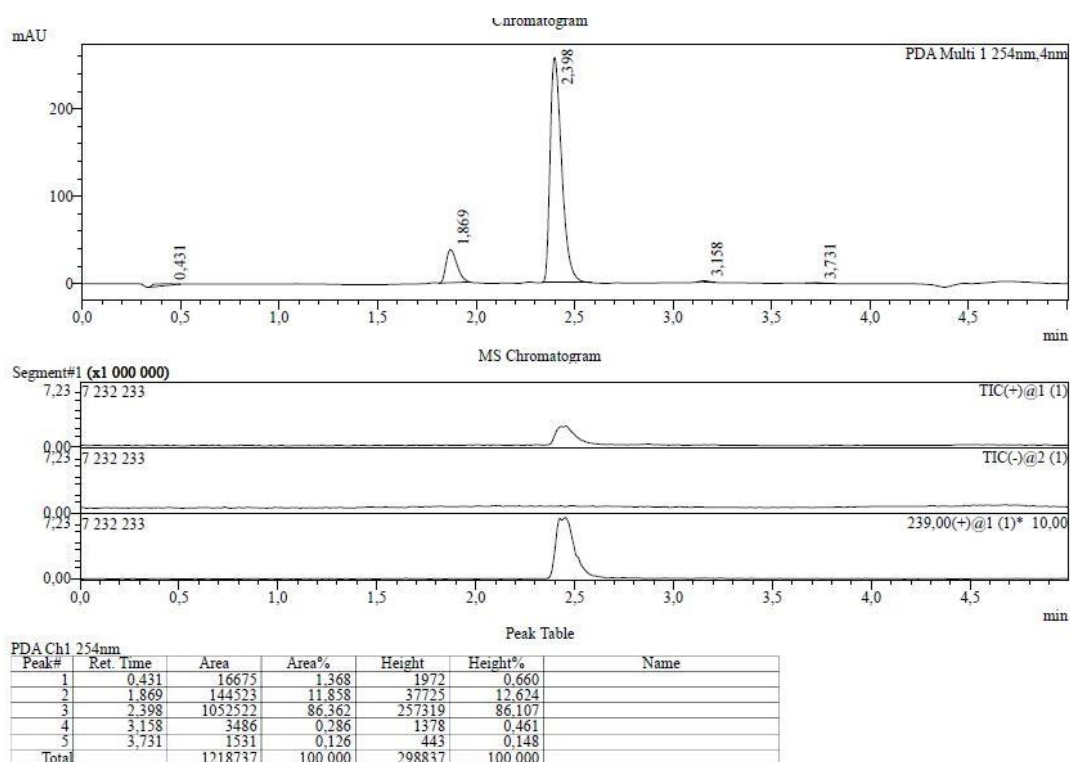

**Supplementary Fig. 81.** The high-performance liquid chromatography chromatogram of compound **S19R/S19S**

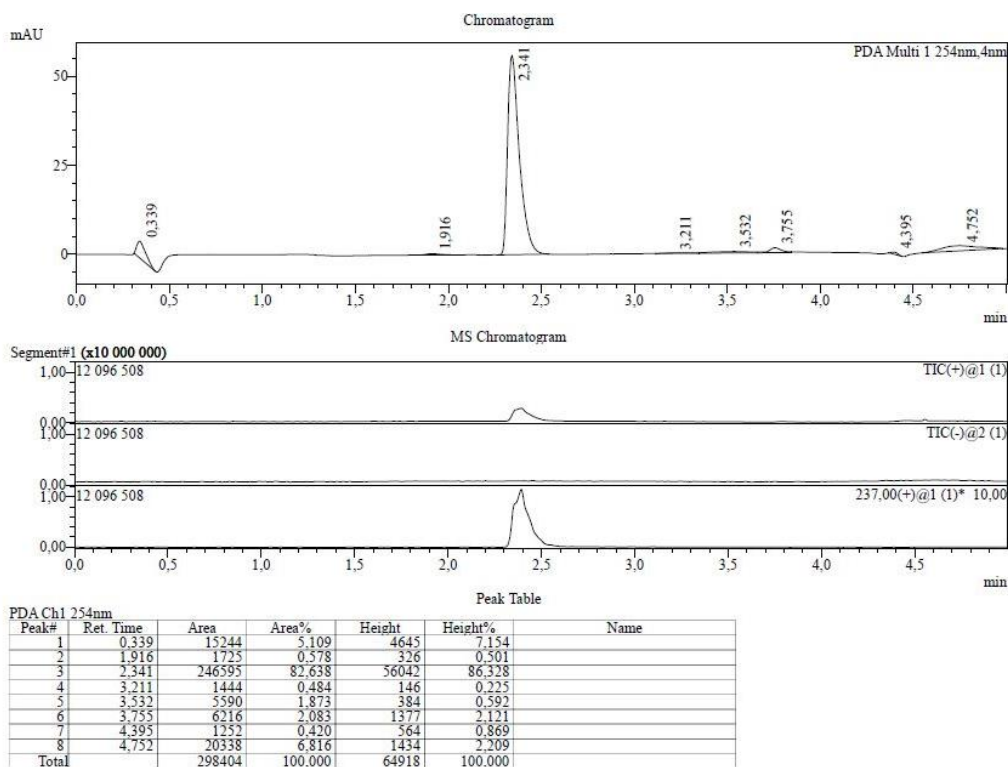

**Supplementary Fig. 82.** The high-performance liquid chromatography chromatogram of compound **S20R,R/S20S,S**

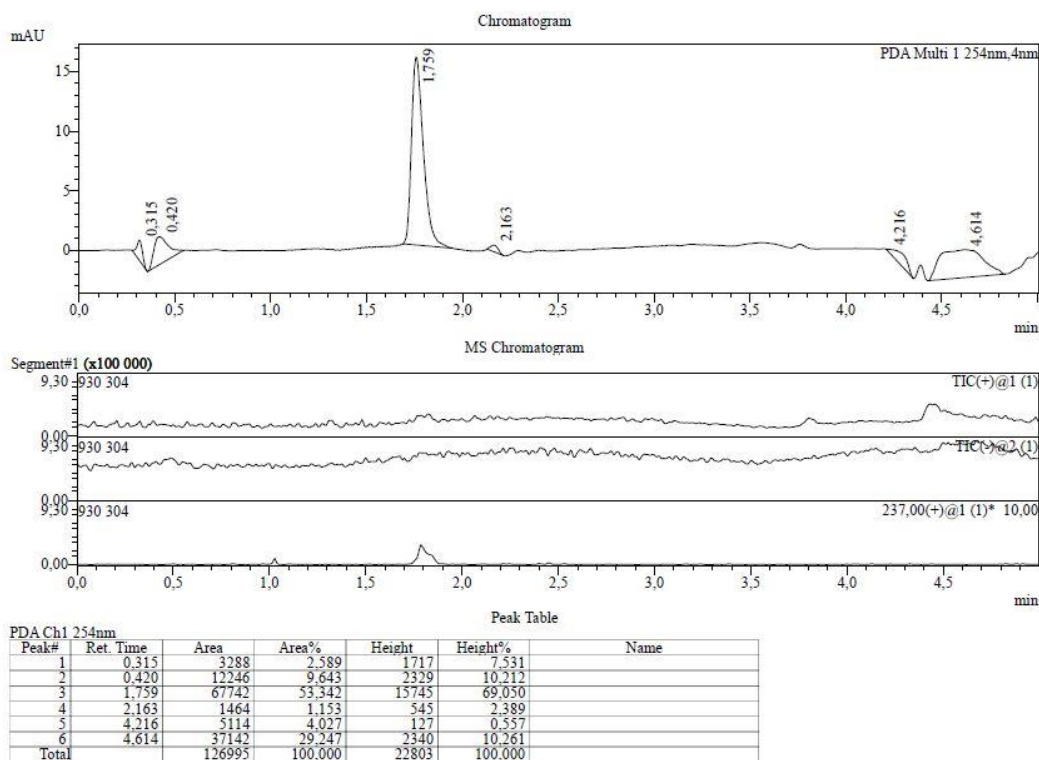

**Supplementary Fig. 83.** The high-performance liquid chromatography chromatogram of compound **S21S,S/S21R,R**

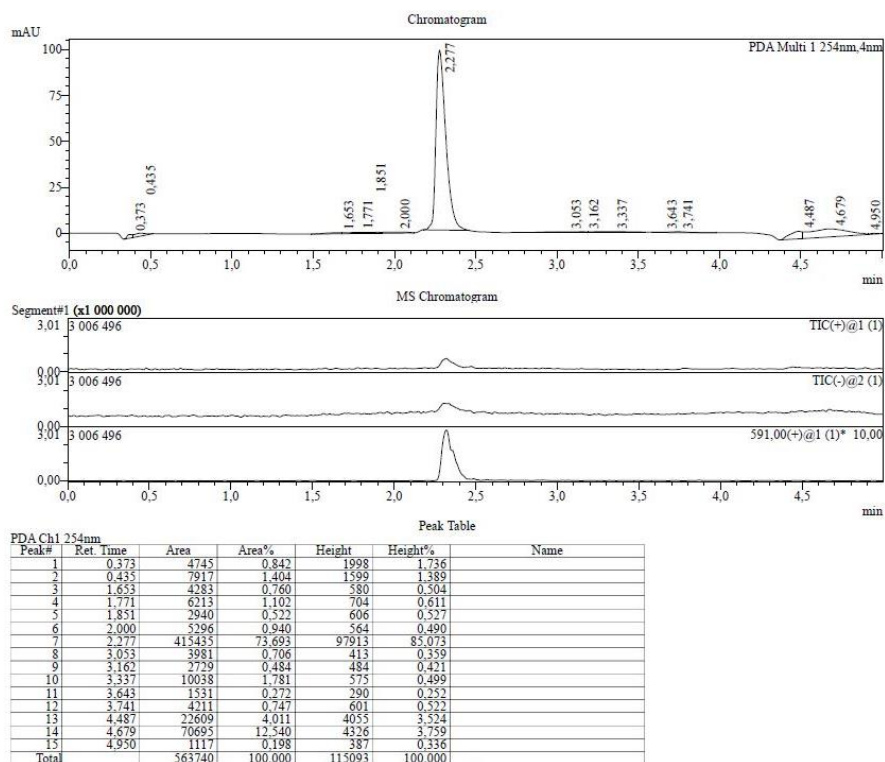

**Supplementary Fig. 84.** The high-performance liquid chromatography chromatogram of compound **1aR-IN-8**

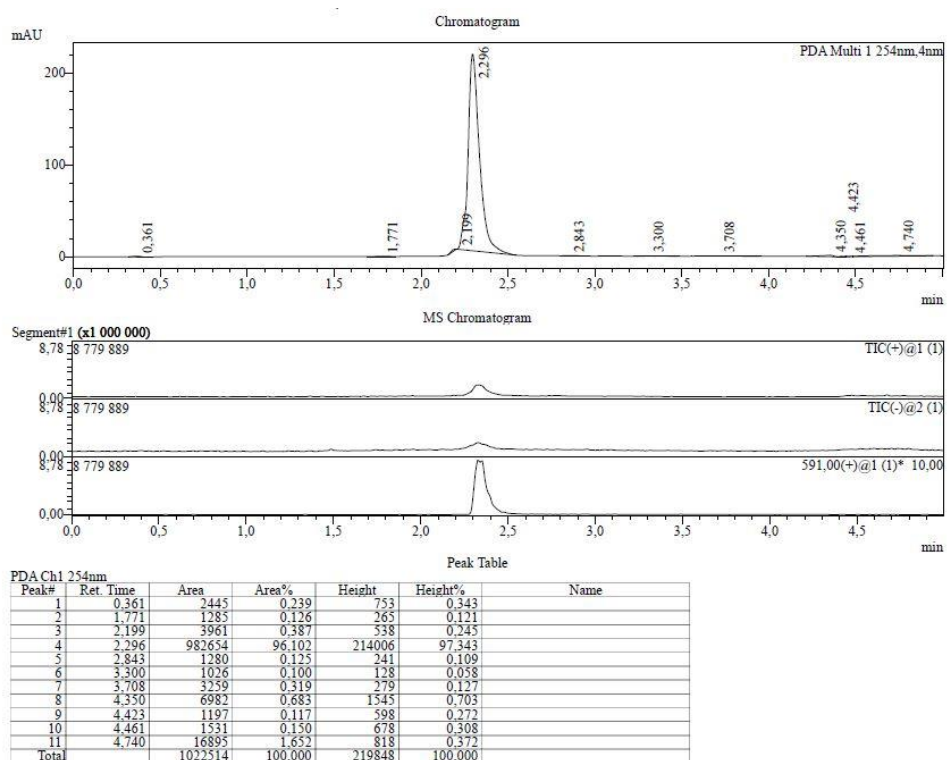

**Supplementary Fig. 85.** The high-performance liquid chromatography chromatogram of compound **1aS-IN-8**

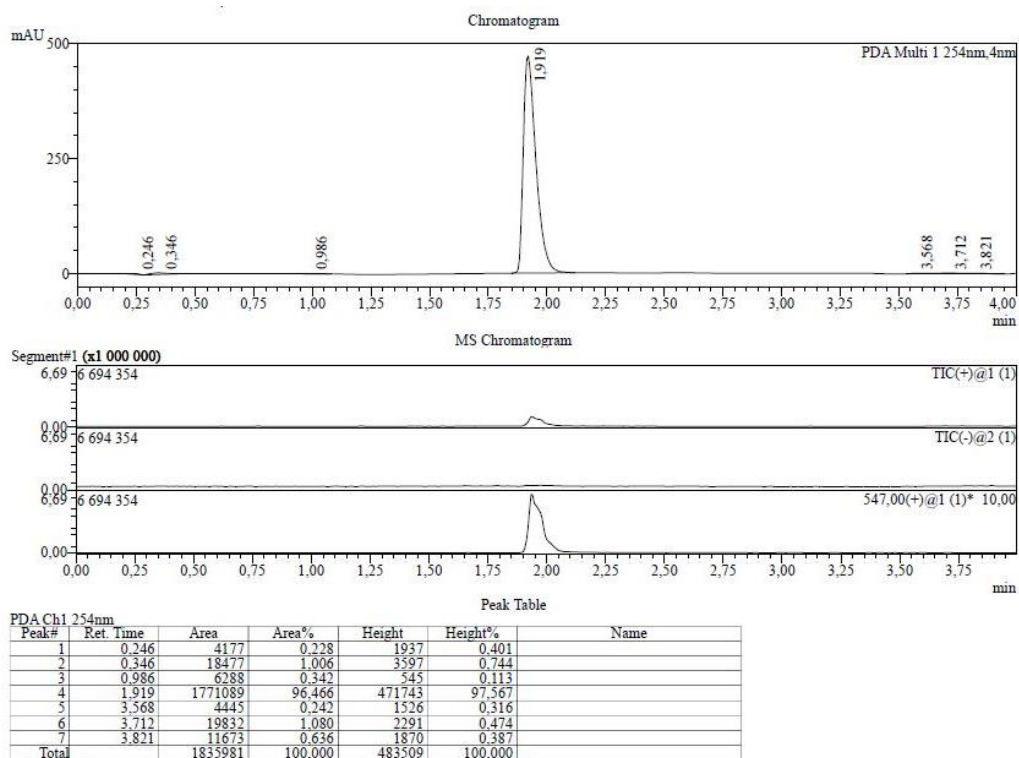

**Supplementary Fig. 86.** The high-performance liquid chromatography chromatogram of compound 2-IN-8

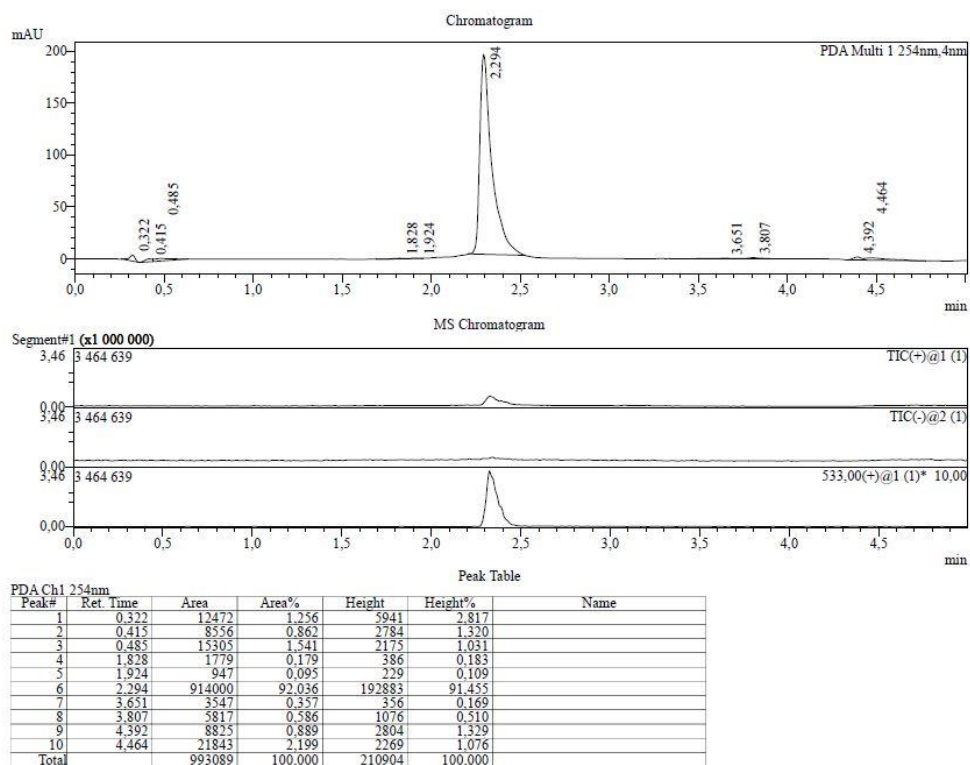

**Supplementary Fig. 87.** The high-performance liquid chromatography chromatogram of compound 3-IN-8

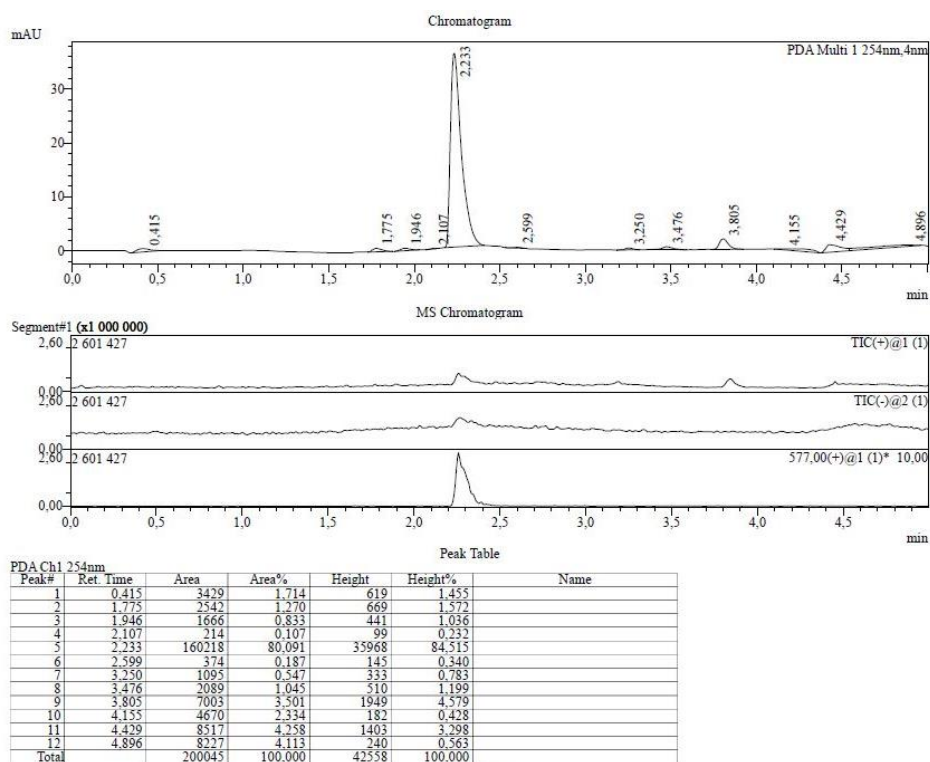

**Supplementary Fig. 88.** The high-performance liquid chromatography chromatogram of compound **4-IN-8**

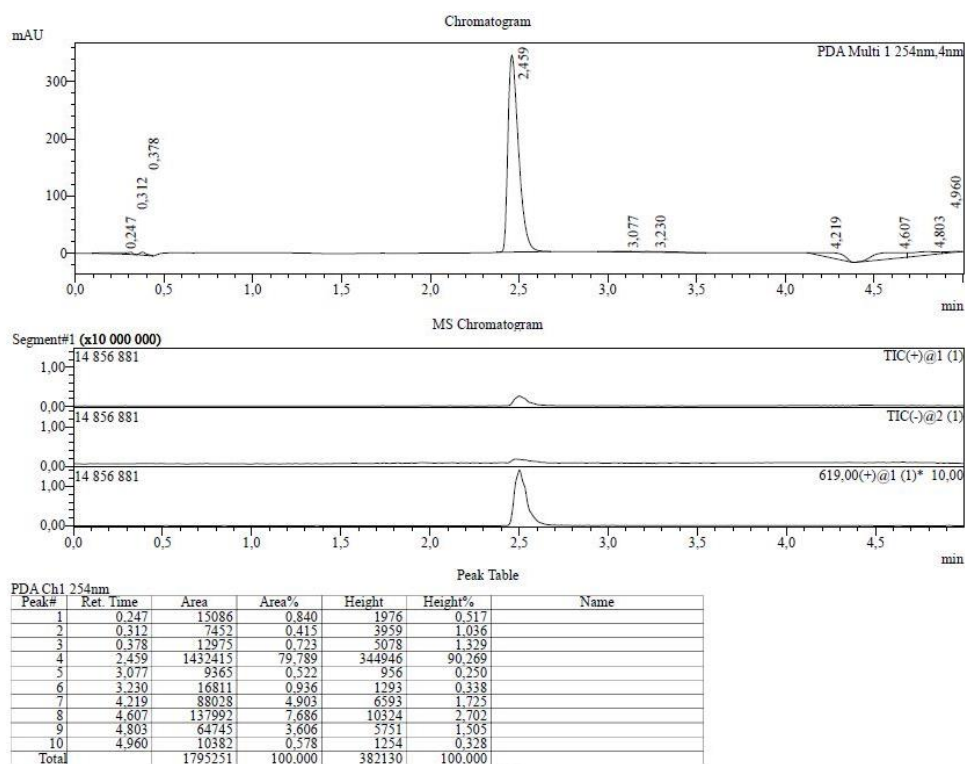

**Supplementary Fig. 89.** The high-performance liquid chromatography chromatogram of compound **5R-IN-8**

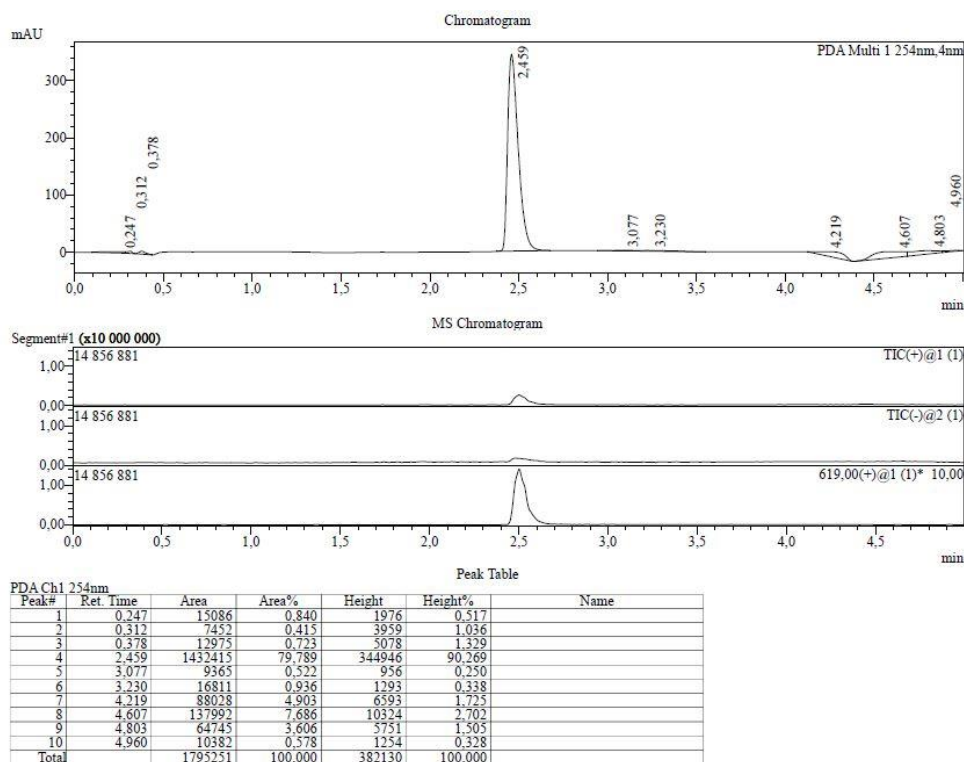

**Supplementary Fig. 90.** The high-performance liquid chromatography chromatogram of compound **5S-IN-8**

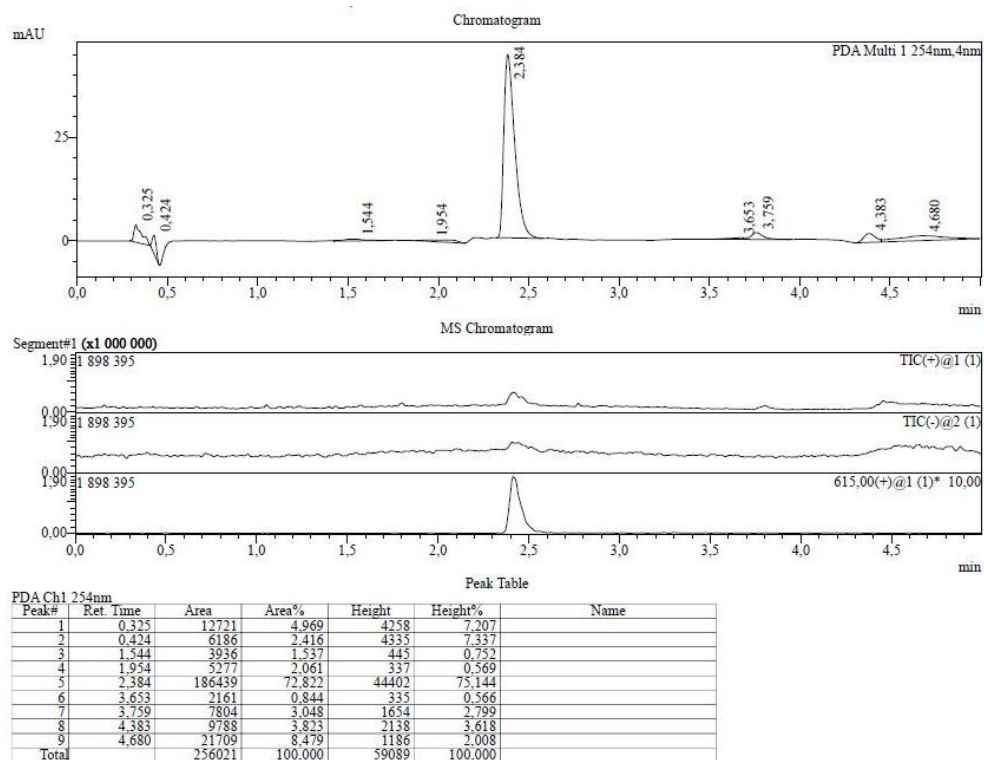

**Supplementary Fig. 91.** The high-performance liquid chromatography chromatogram of compound **6R,R-IN-8**



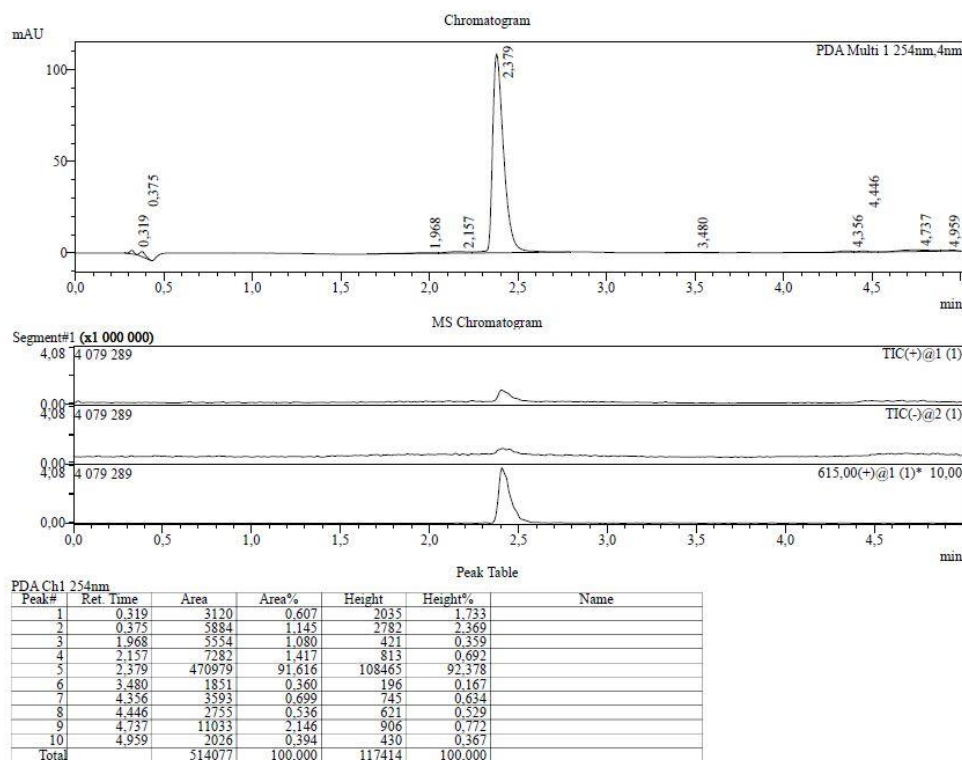

**Supplementary Fig. 92.** The high-performance liquid chromatography chromatogram of compound **6S,S-IN-8**

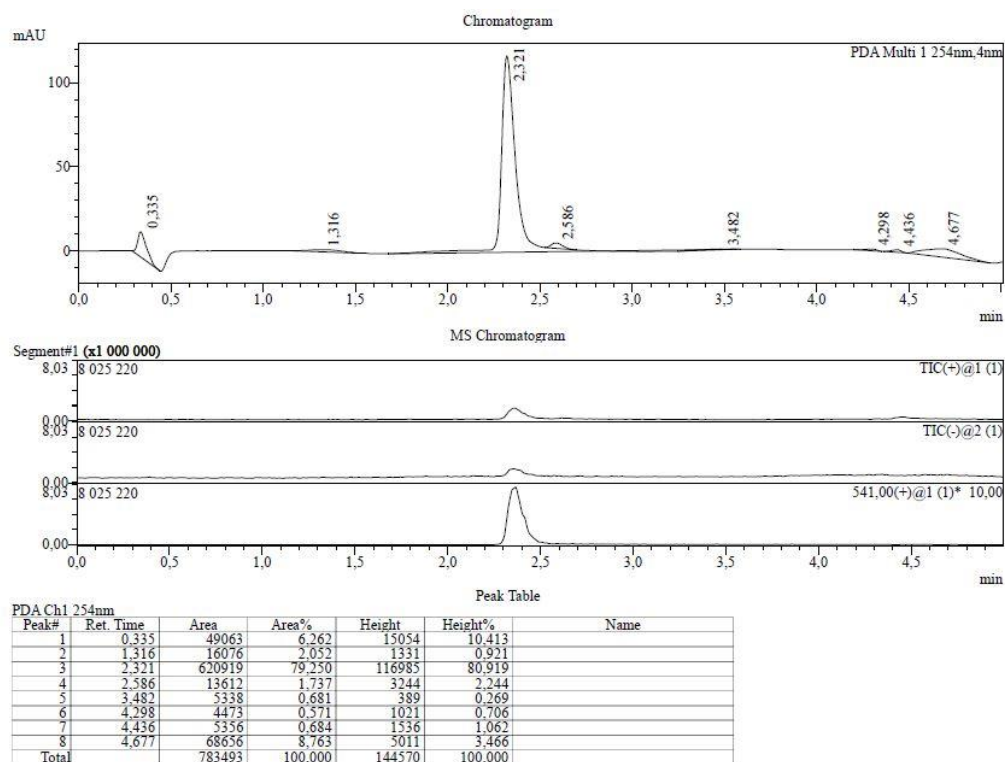

**Supplementary Fig. 93.** The high-performance liquid chromatography chromatogram of compound **S26**

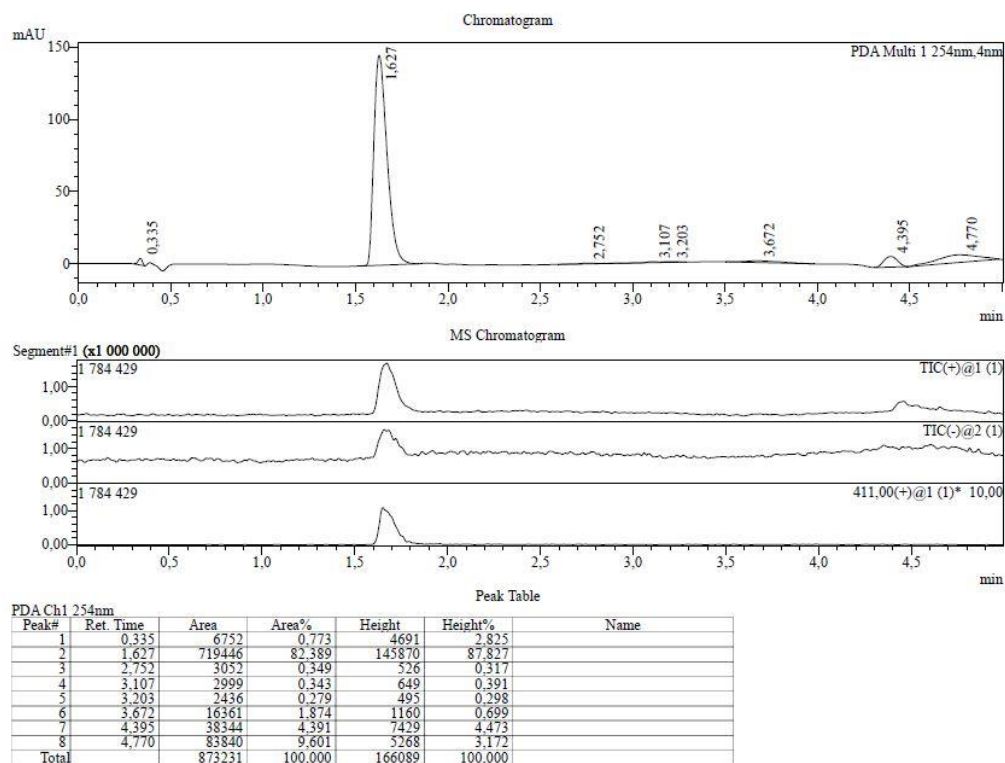

**Supplementary Fig. 94.** The high-performance liquid chromatography chromatogram of compound **S27**

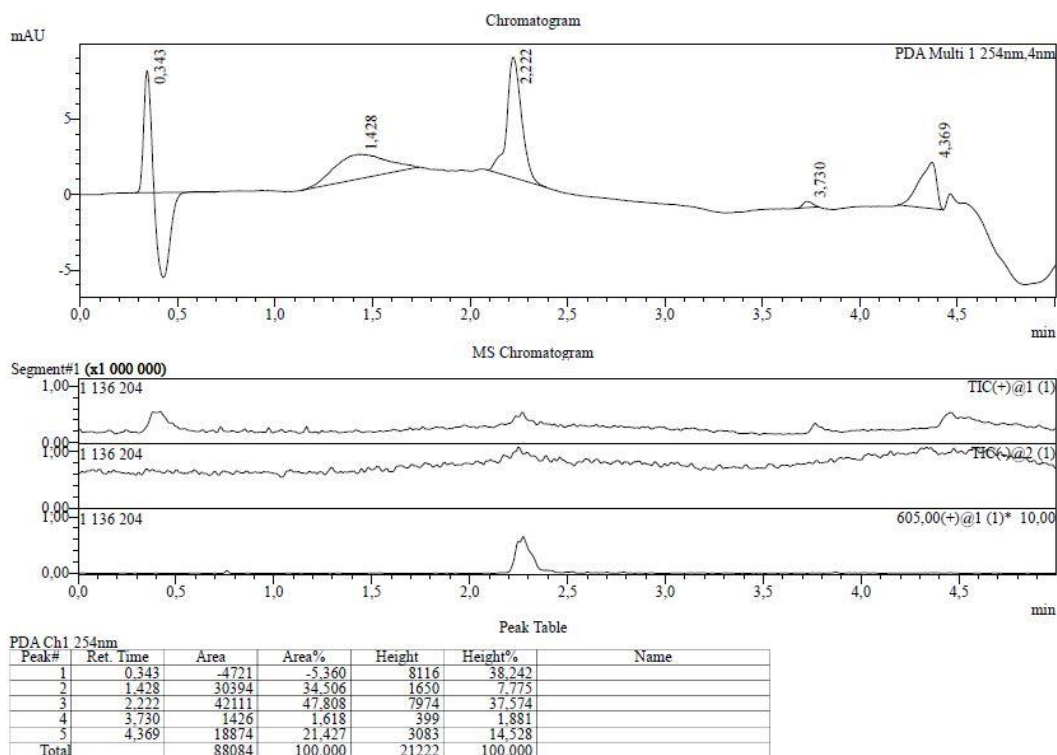

**Supplementary Fig. 95.** The high-performance liquid chromatography chromatogram of compound **1a'R-IN-8**

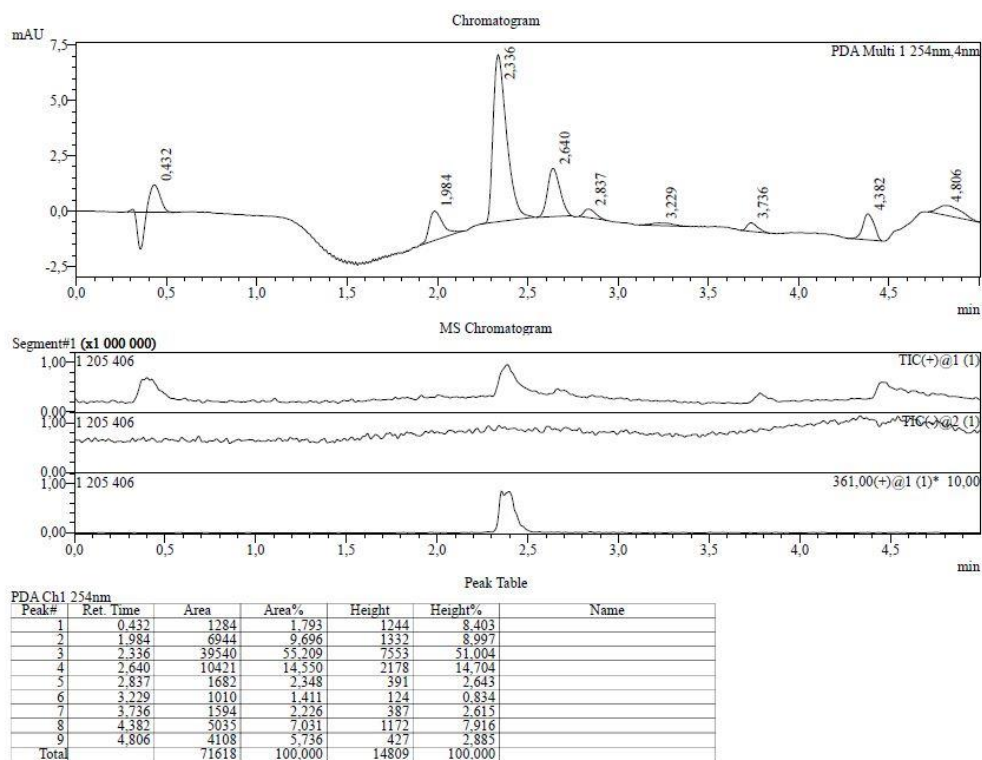

**Supplementary Fig. 96.** The high-performance liquid chromatography chromatogram of compound S29

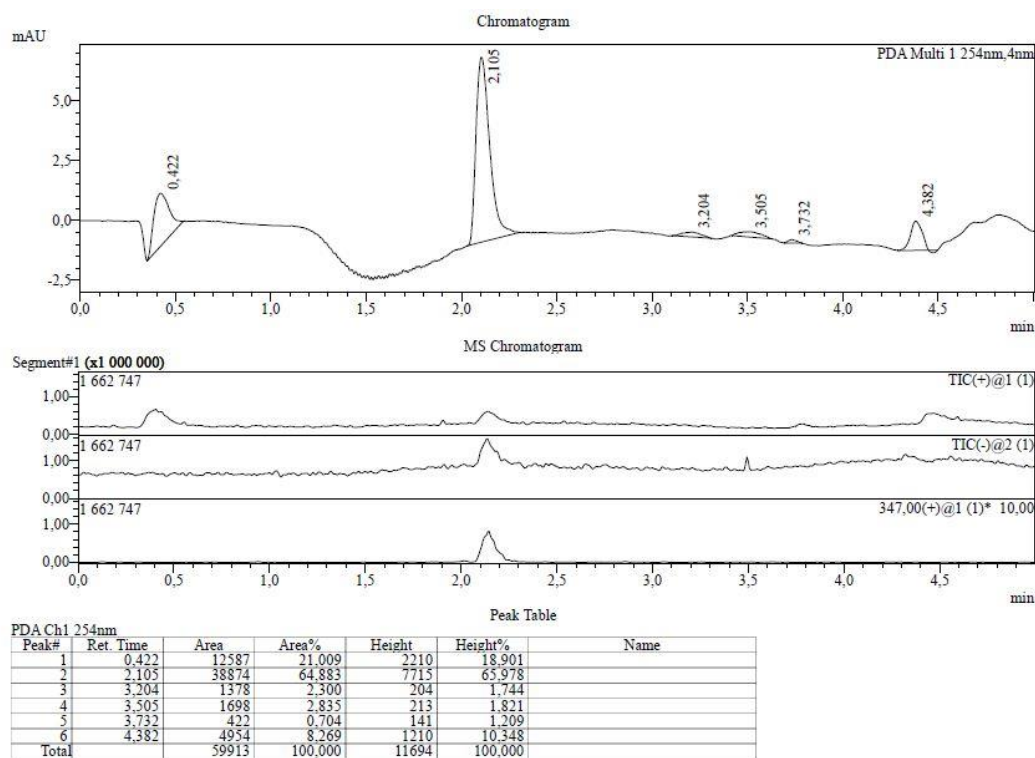

**Supplementary Fig. 97.** The high-performance liquid chromatography chromatogram of compound S30

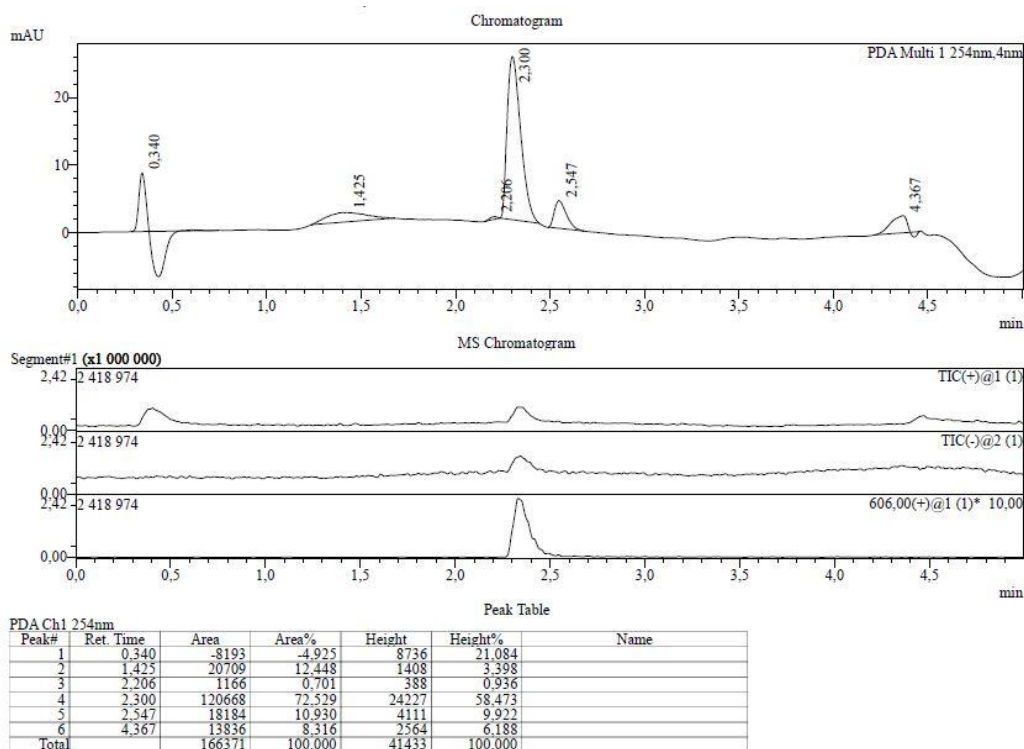

**Supplementary Fig. 98.** The high-performance liquid chromatography chromatogram of compound **1a**<sup>R</sup>-IN-8

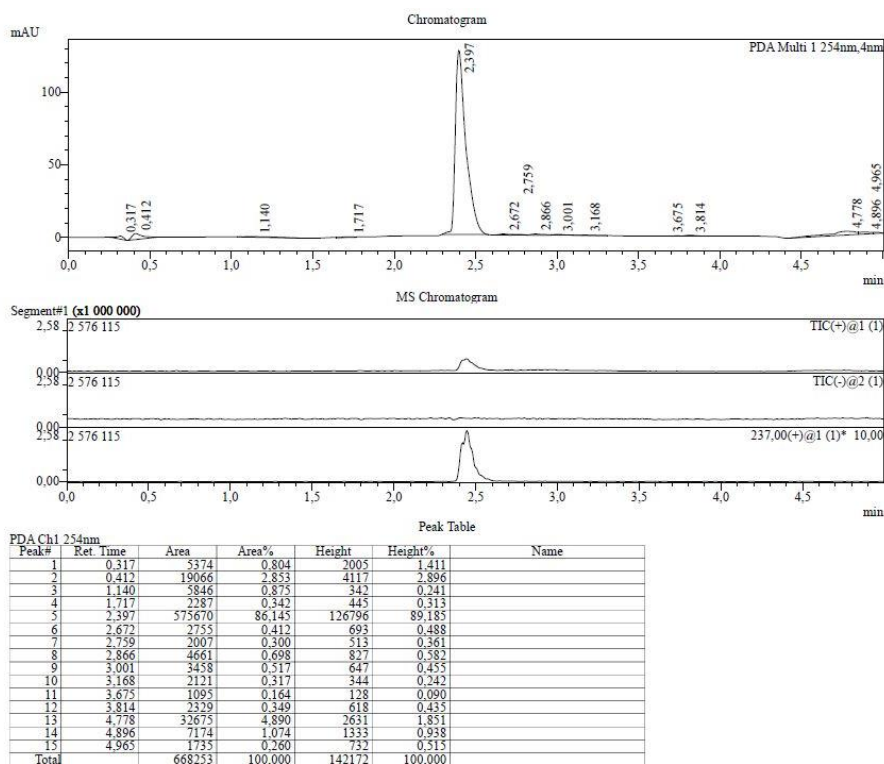

**Supplementary Fig. 99.** The high-performance liquid chromatography chromatogram of compound **S32R/S32S**

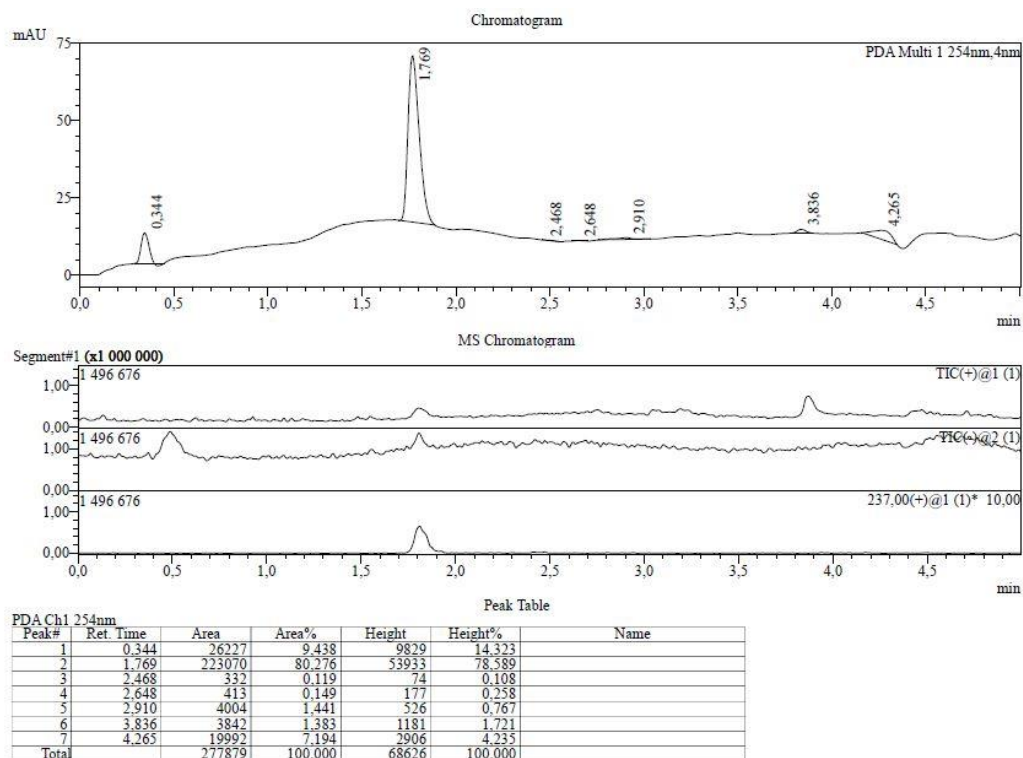

**Supplementary Fig. 100.** The high-performance liquid chromatography chromatogram of compound **S33R/S33S**

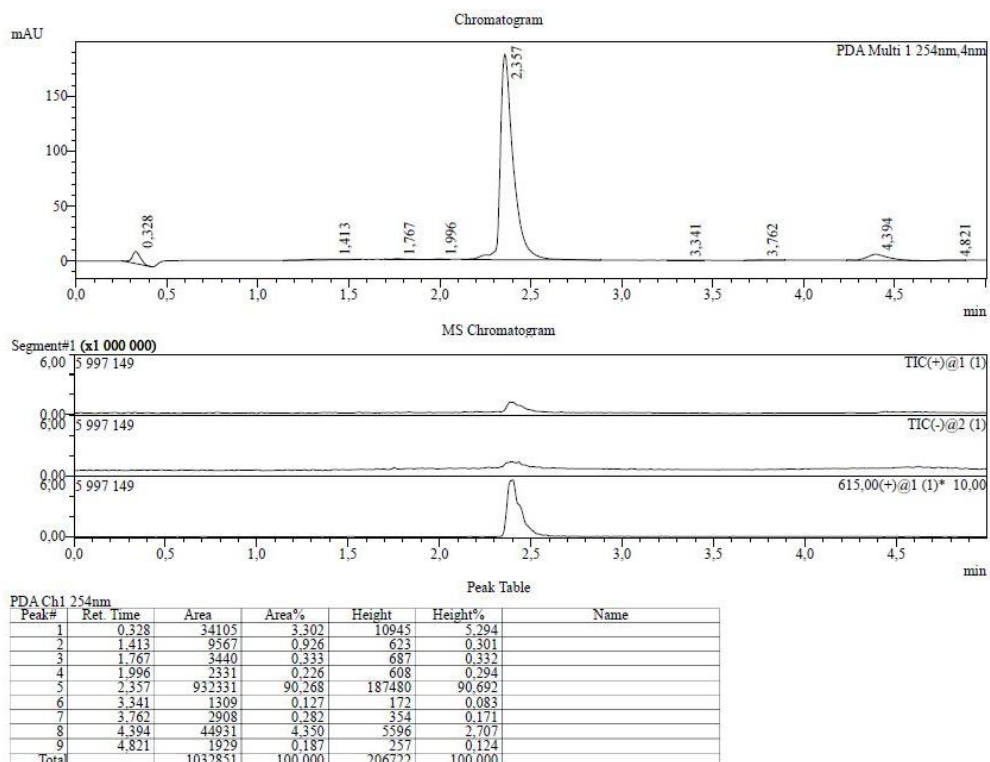

**Supplementary Fig. 101.** The high-performance liquid chromatography chromatogram of compound **1bR-IN-8**

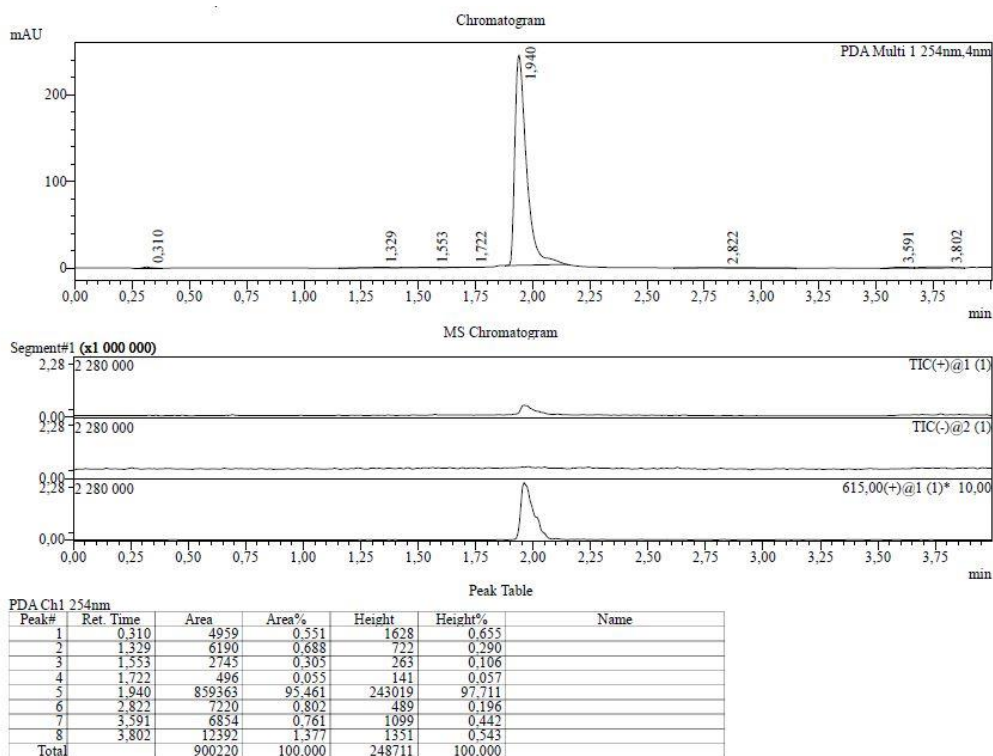

**Supplementary Fig. 102.** The high-performance liquid chromatography chromatogram of compound **1bS-IN-8**

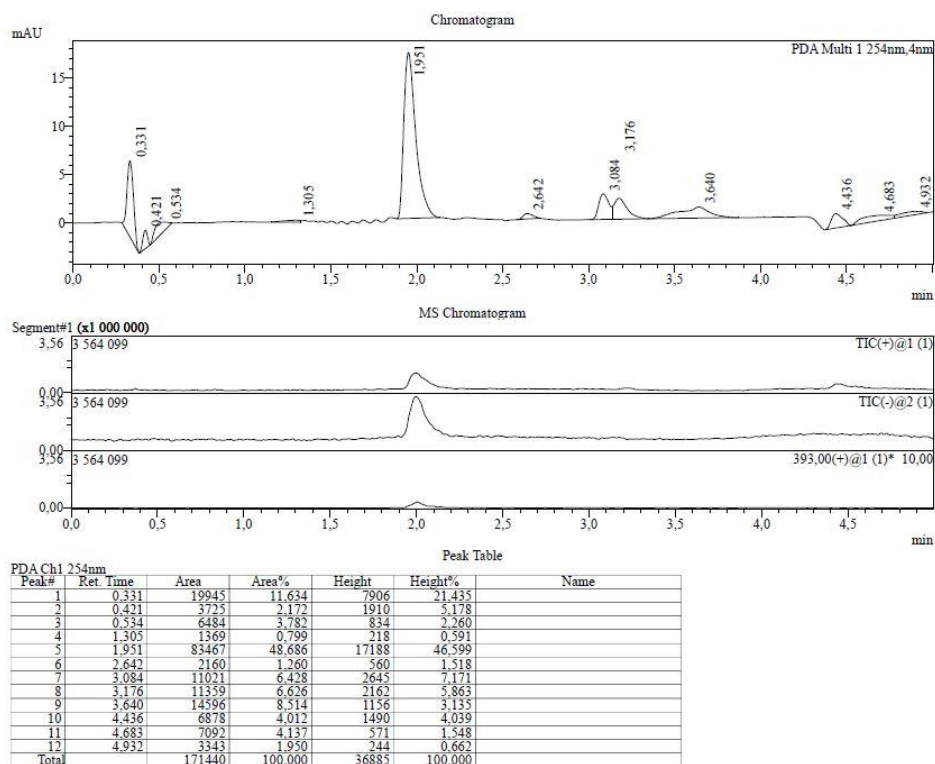

**Supplementary Fig. 103.** The high-performance liquid chromatography chromatogram of compound **S34R/S34S**

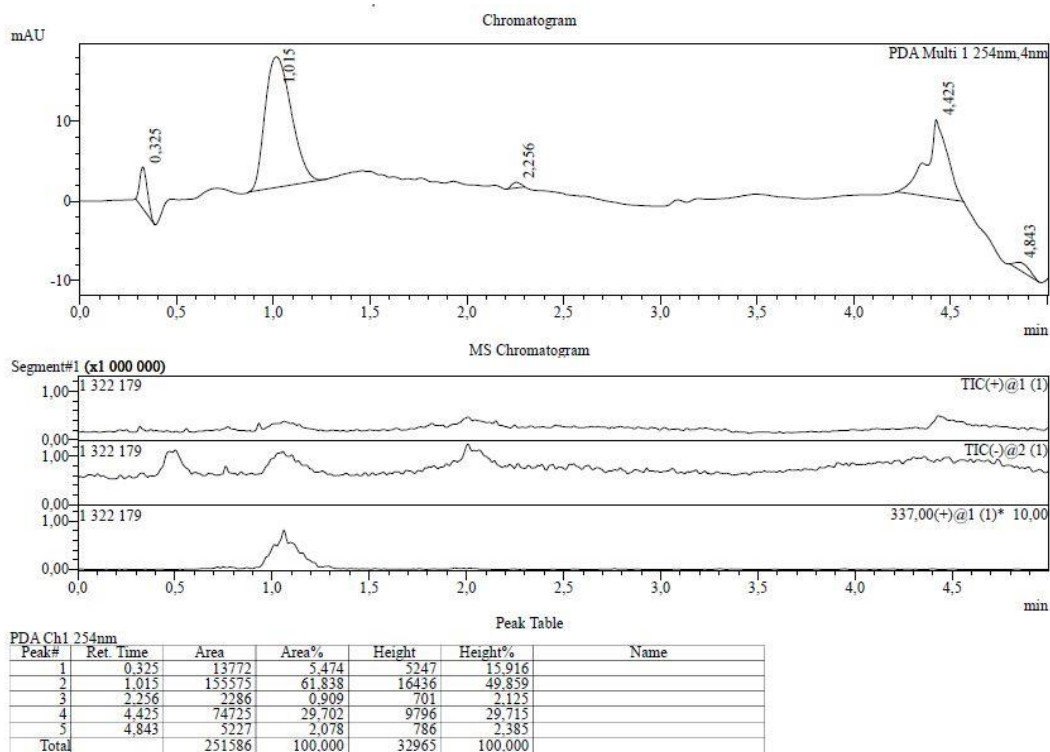

**Supplementary Fig. 104.** The high-performance liquid chromatography chromatogram of compound **S35R/S35S**

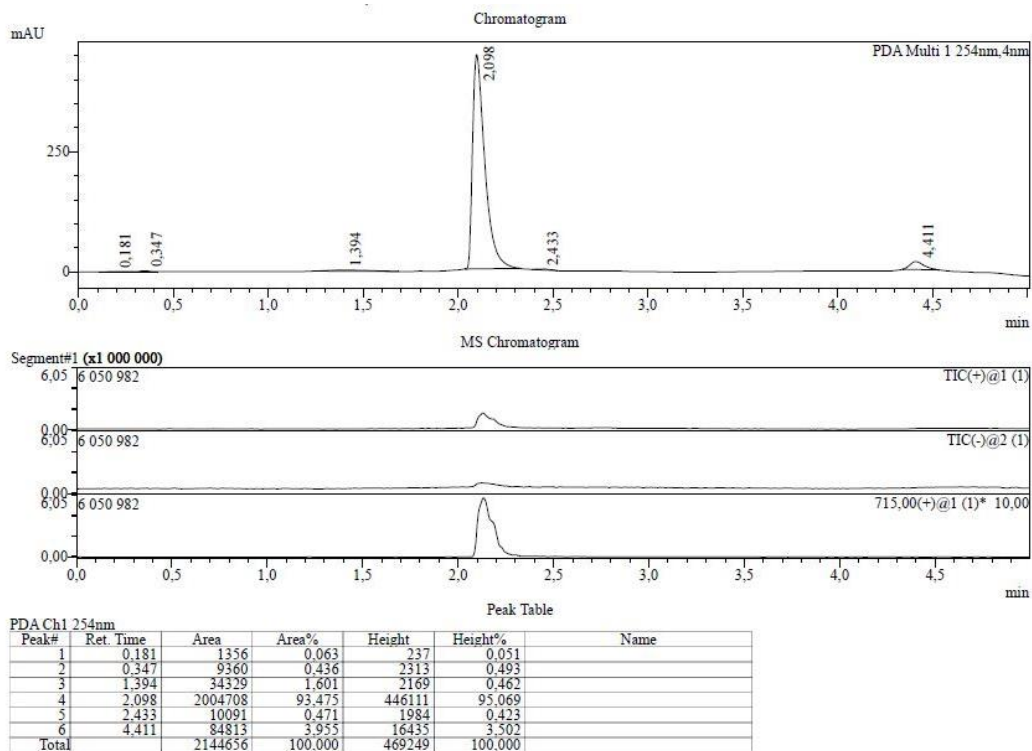

**Supplementary Fig. 105.** The high-performance liquid chromatography chromatogram of compound **1cR-IN-8**

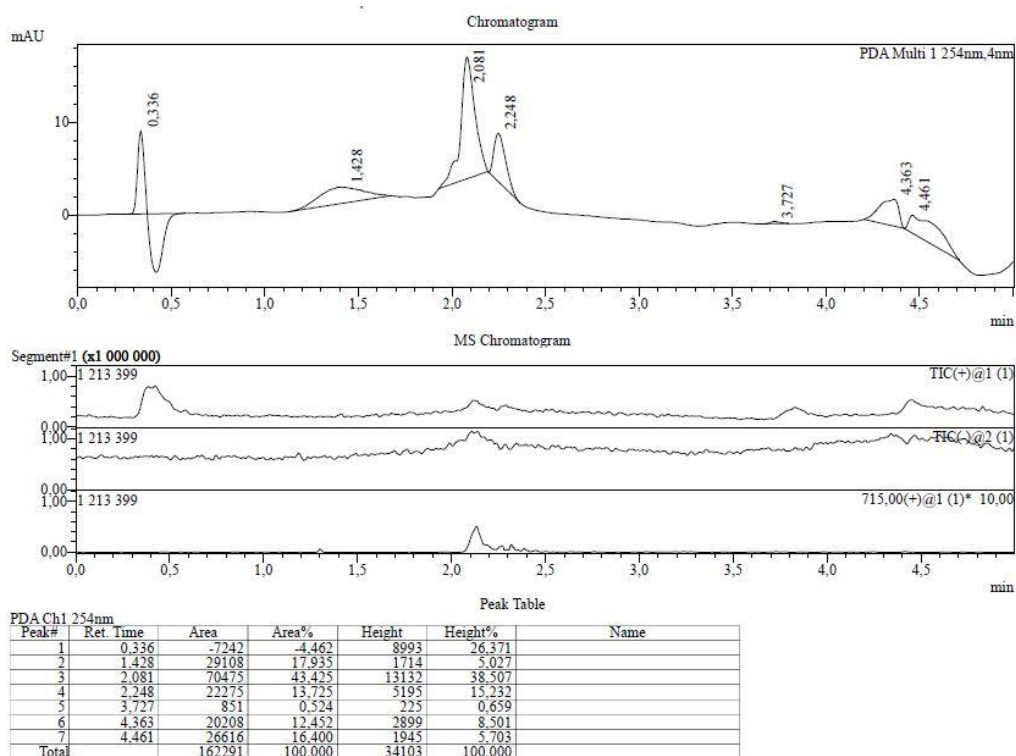

**Supplementary Fig. 106.** The high-performance liquid chromatography chromatogram of compound **1cS-IN-8**

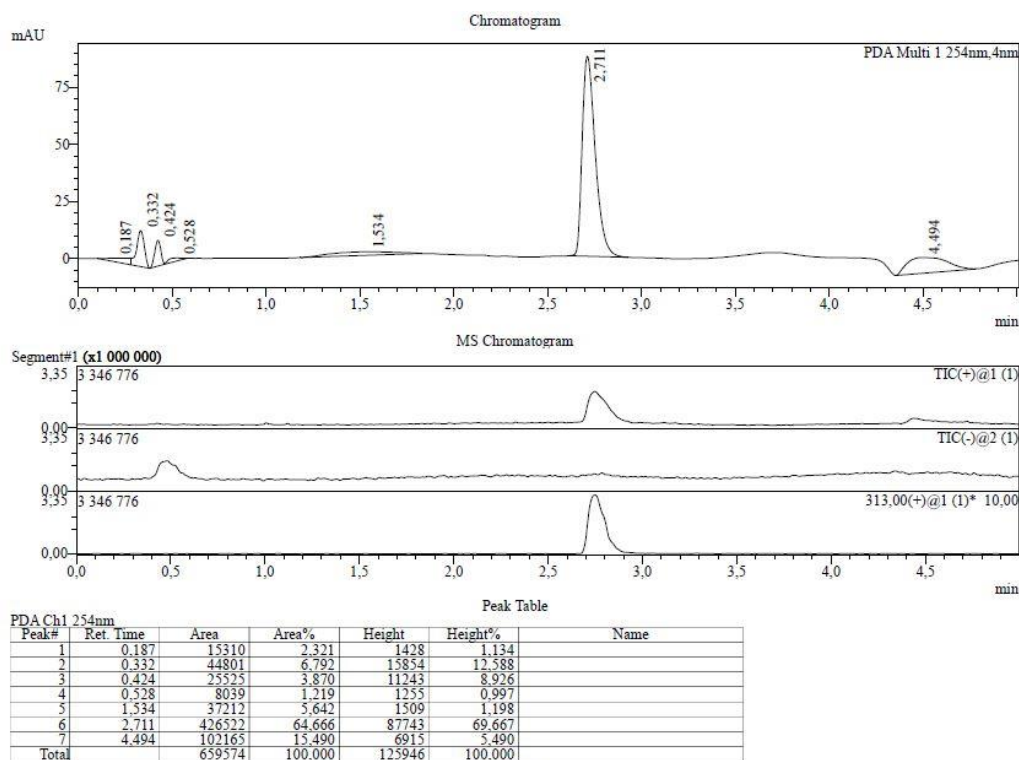

**Supplementary Fig. 107.** The high-performance liquid chromatography chromatogram of compound **S36R**



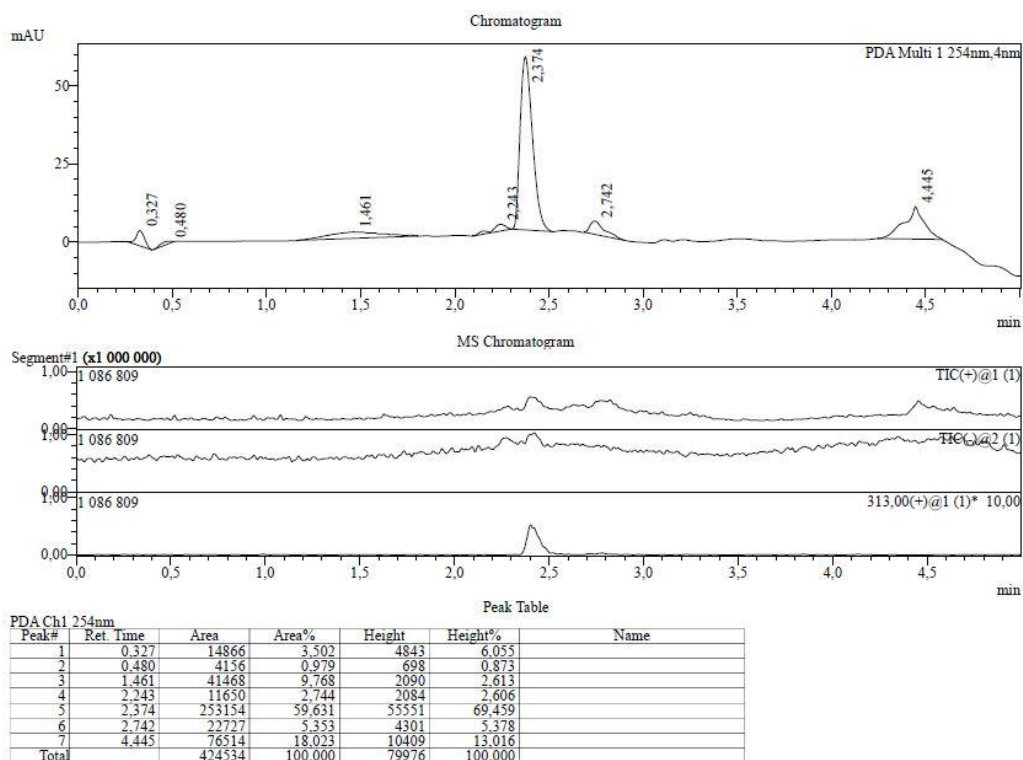

**Supplementary Fig. 108.** The high-performance liquid chromatography chromatogram of compound **S37R**

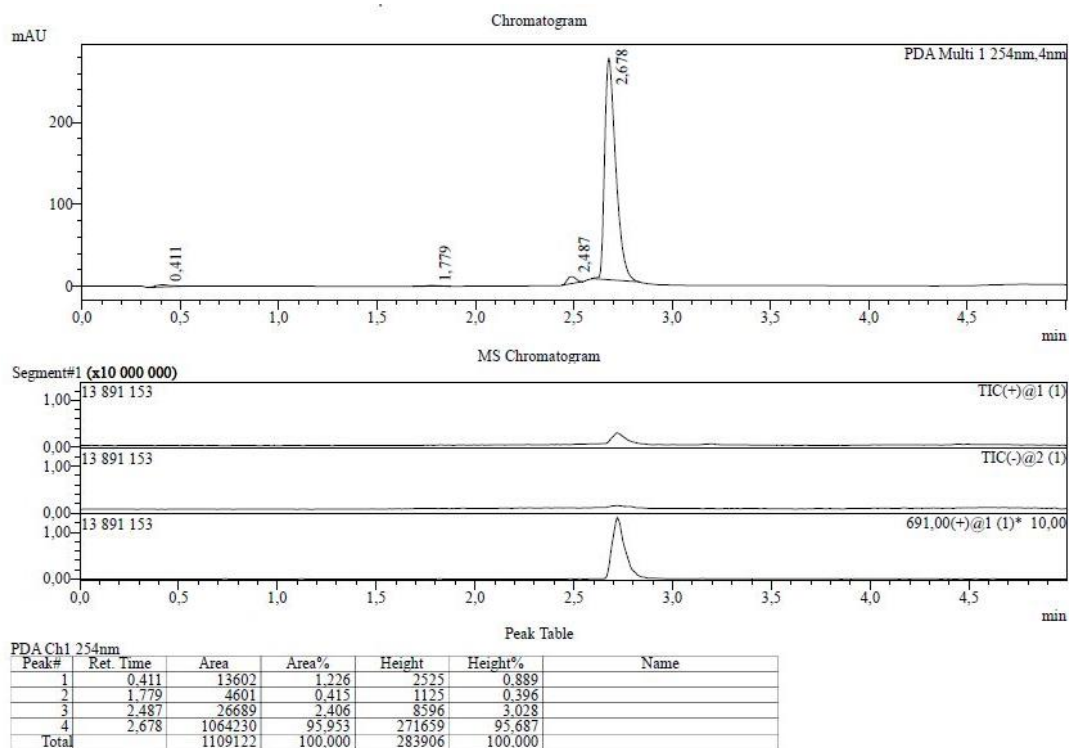

**Supplementary Fig. 109.** The high-performance liquid chromatography chromatogram of compound **1dR-IN-8**

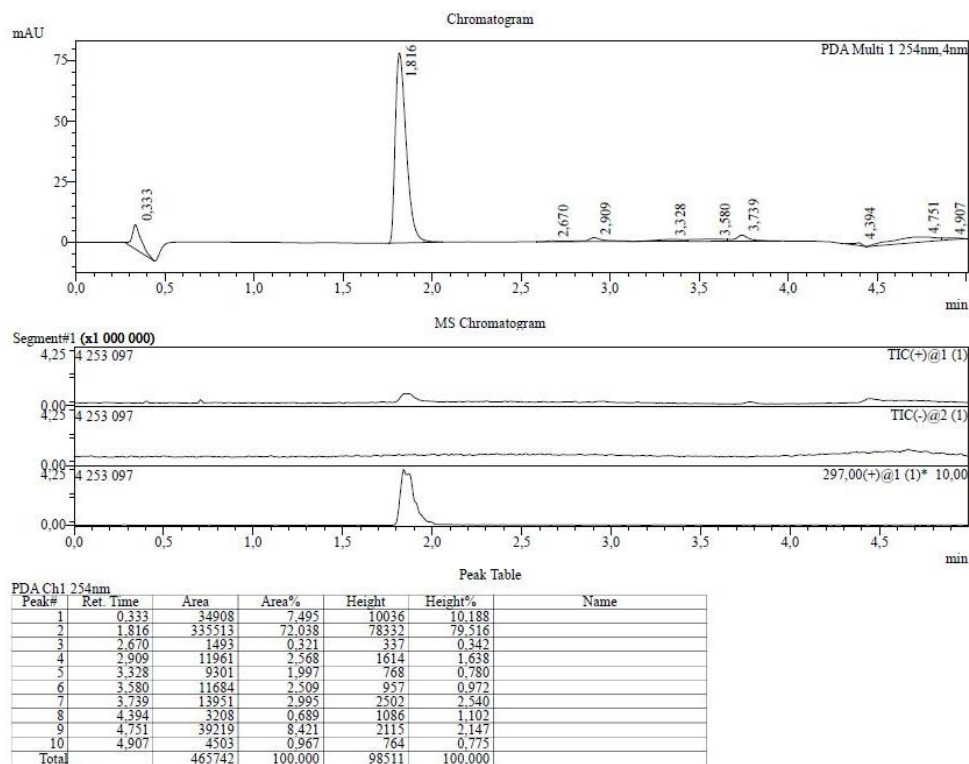

**Supplementary Fig. 110.** The high-performance liquid chromatography chromatogram of compound **S39**

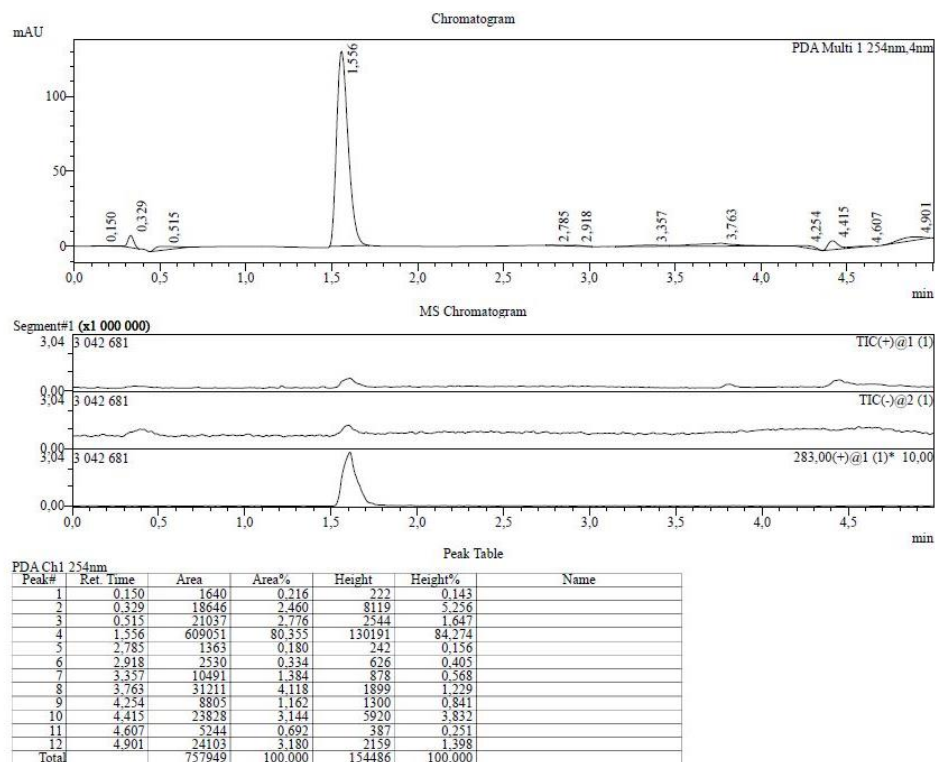

**Supplementary Fig. 111.** The high-performance liquid chromatography chromatogram of compound **S40**

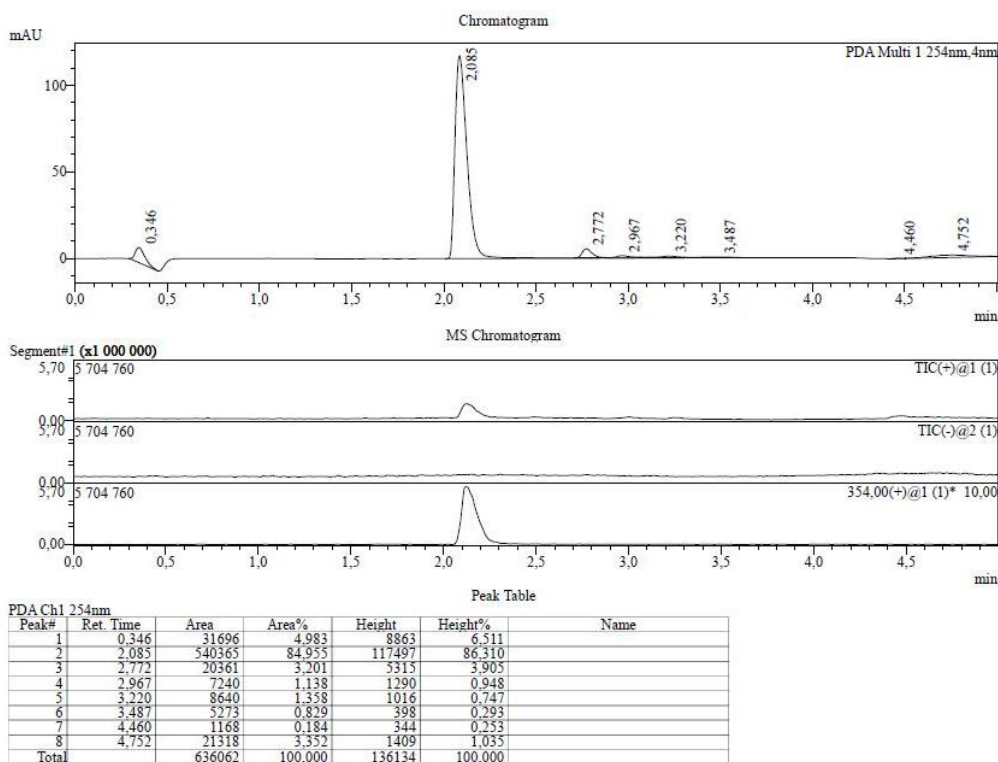

**Supplementary Fig. 112.** The high-performance liquid chromatography chromatogram of compound S41

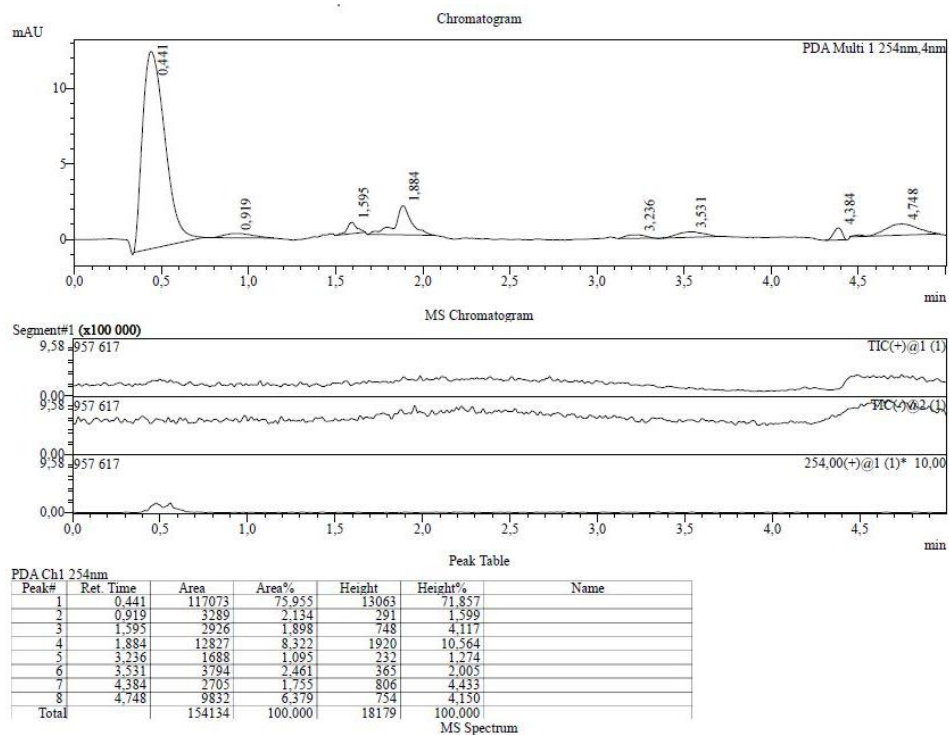

**Supplementary Fig. 113.** The high-performance liquid chromatography chromatogram of compound S42

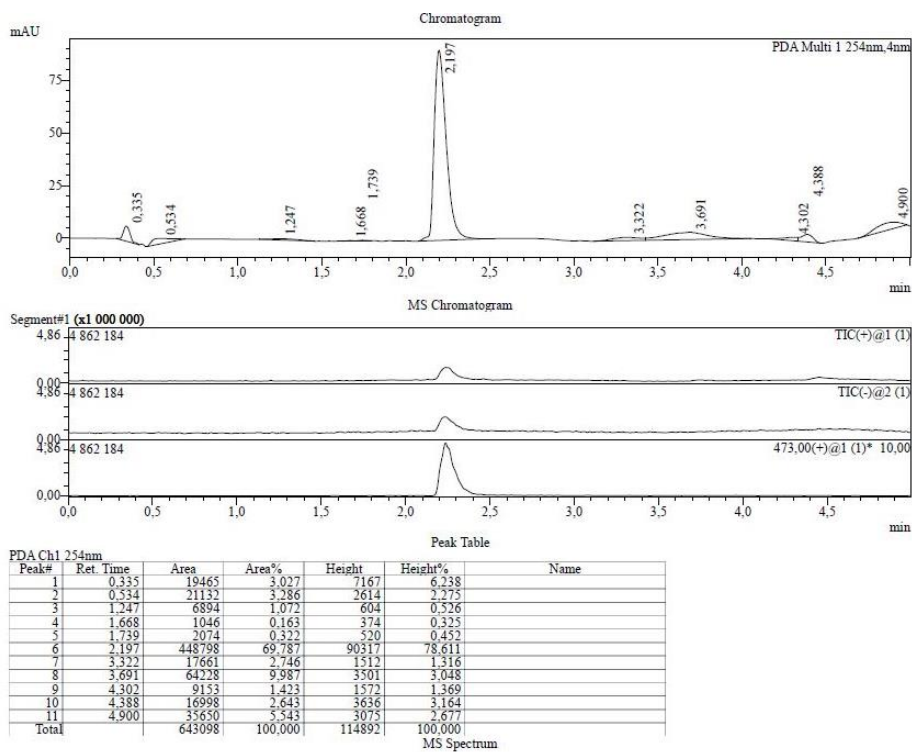

**Supplementary Fig. 114.** The high-performance liquid chromatography chromatogram of compound S44

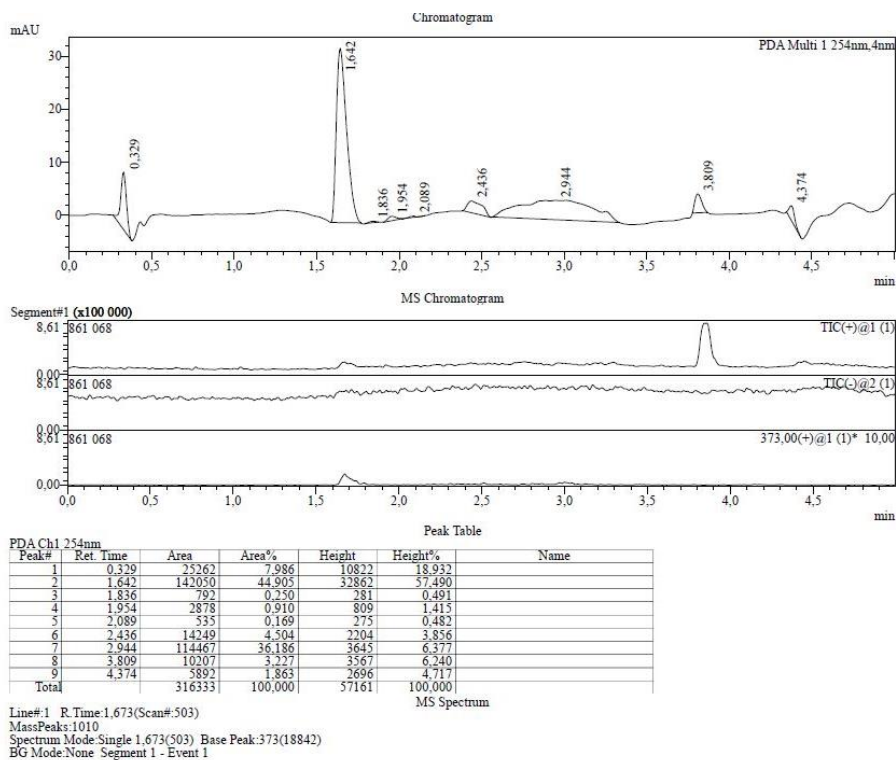

**Supplementary Fig. 115.** The high-performance liquid chromatography chromatogram of compound S45

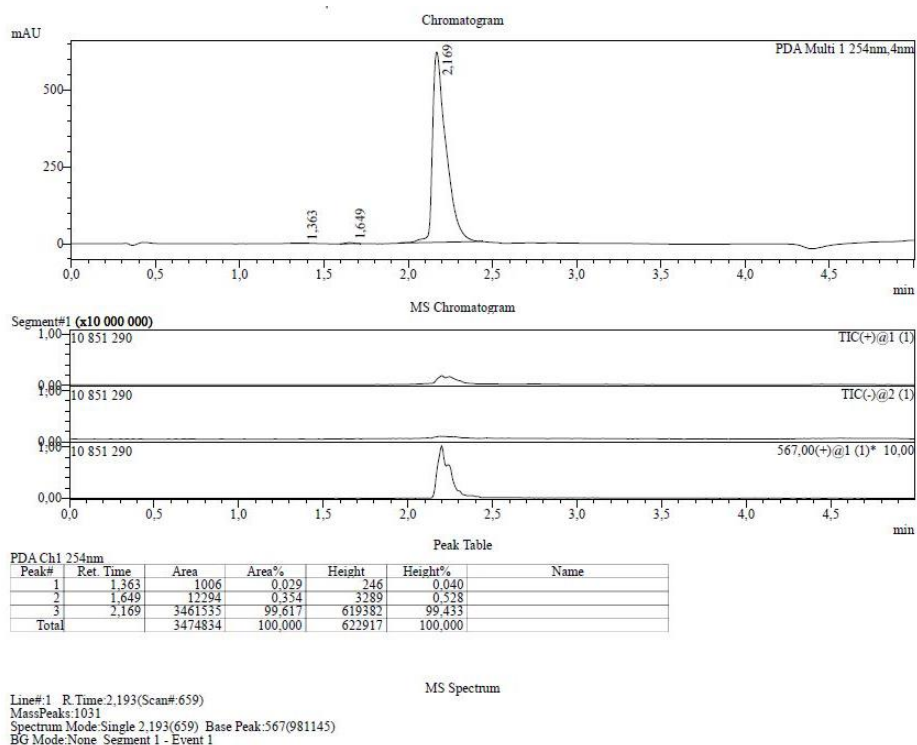

**Supplementary Fig. 116.** The high-performance liquid chromatography chromatogram of compound **1aR-isoPHEN**

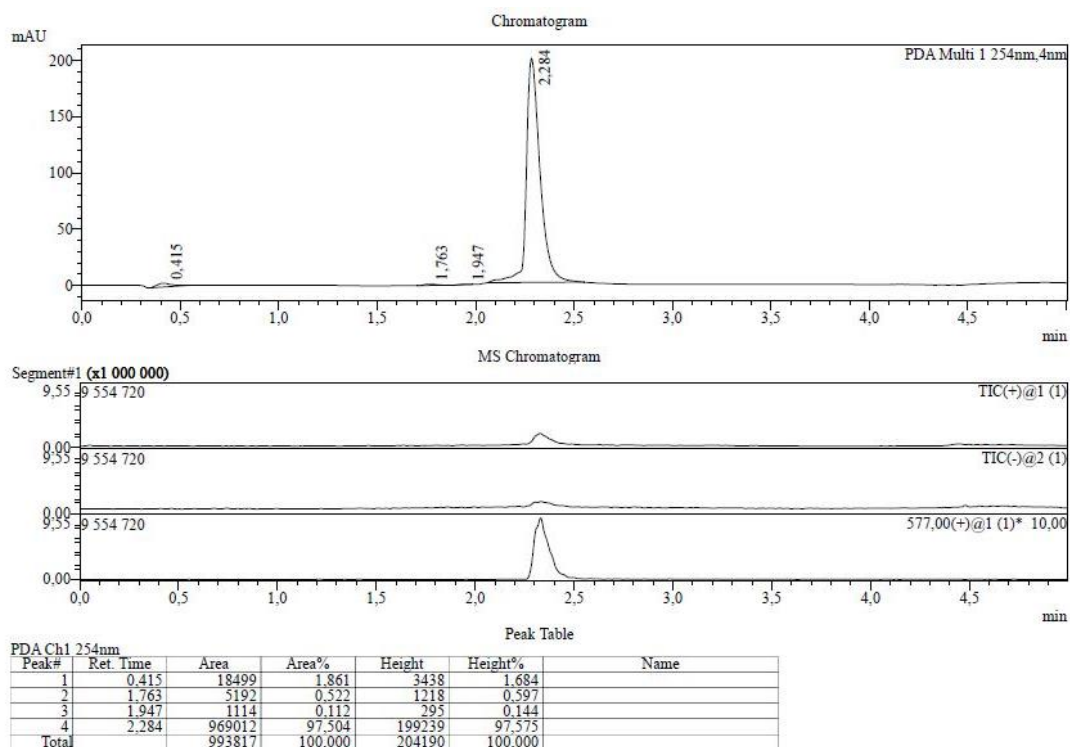

**Supplementary Fig. 117.** The high-performance liquid chromatography chromatogram of compound **1aR-IN-7**

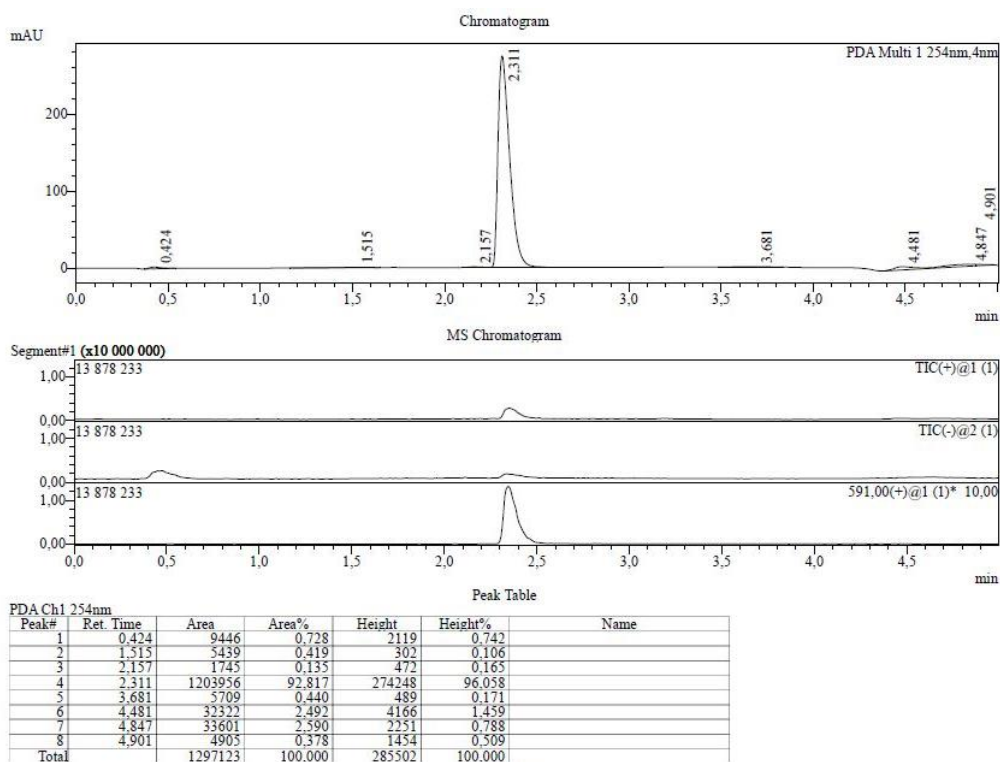

**Supplementary Fig. 118.** The high-performance liquid chromatography chromatogram of compound **1aR-IN-9**

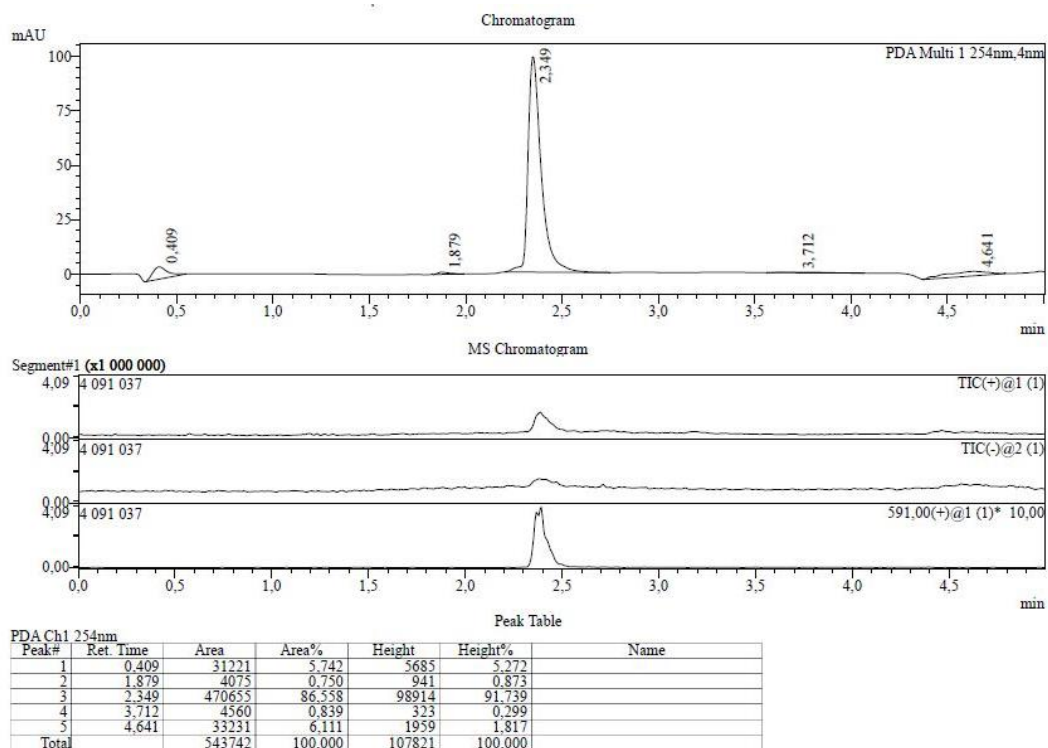

**Supplementary Fig. 119.** The high-performance liquid chromatography chromatogram of compound **1aR-IN-10**

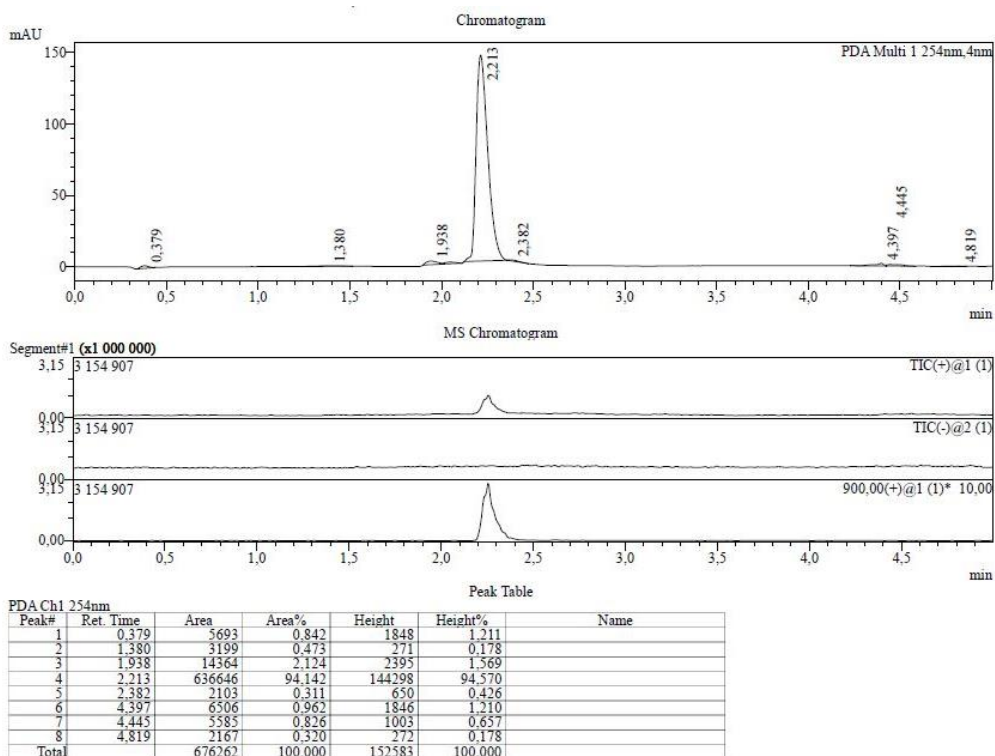

**Supplementary Fig. 120.** The high-performance liquid chromatography chromatogram of compound **Photocaged 1aR-IN-8**

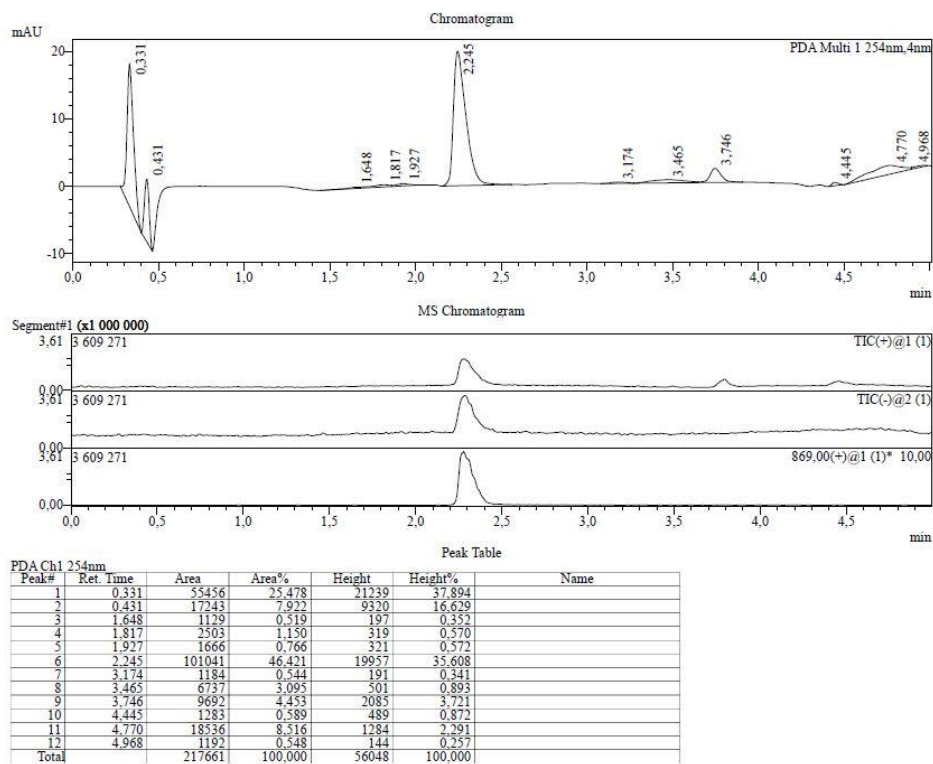

**Supplementary Fig. 121.** The high-performance liquid chromatography chromatogram of compound **PRT\_1**

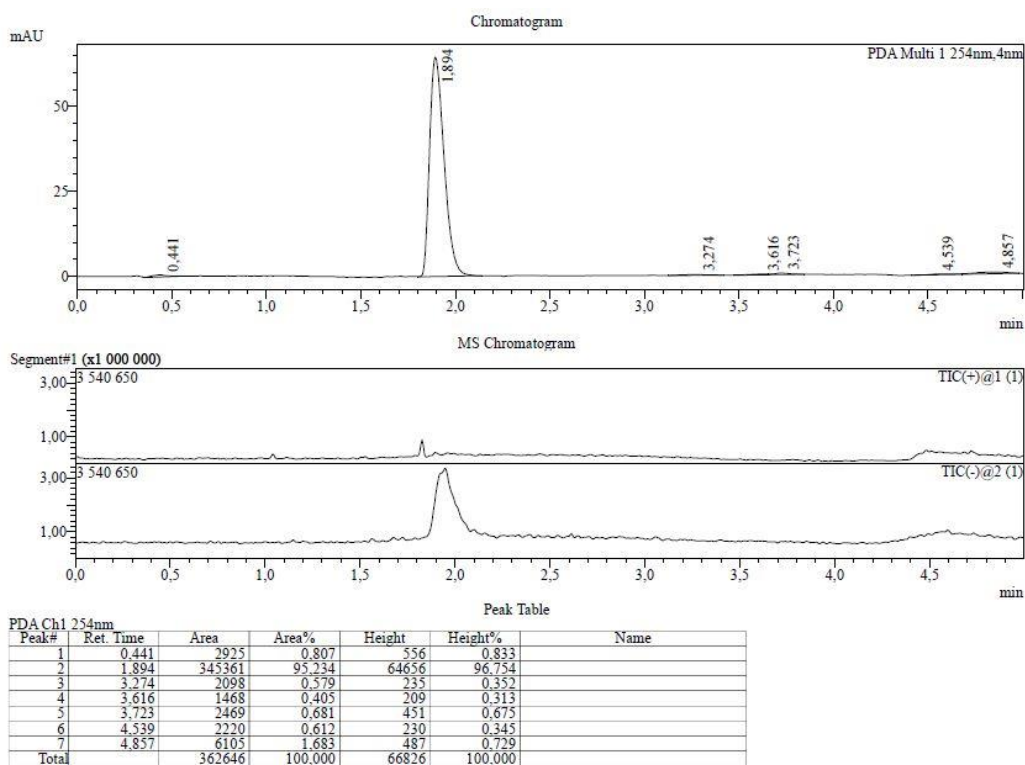

**Supplementary Fig. 122.** The high-performance liquid chromatography chromatogram of compound **S48**

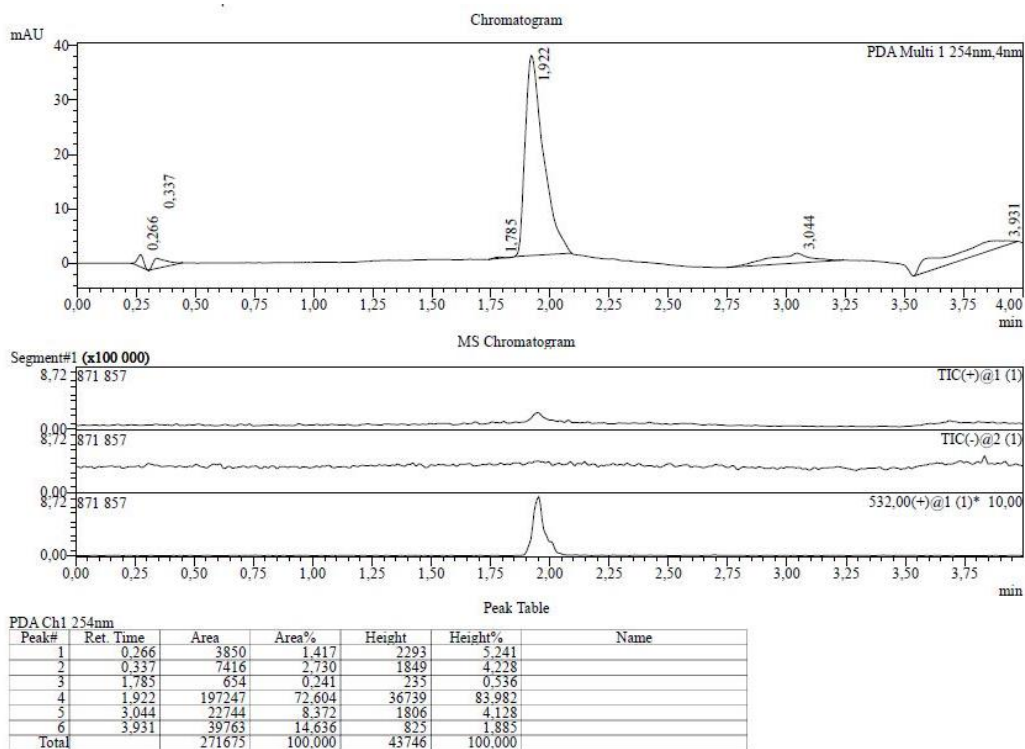

**Supplementary Fig. 123.** The high-performance liquid chromatography chromatogram of compound **CA-IN-8**



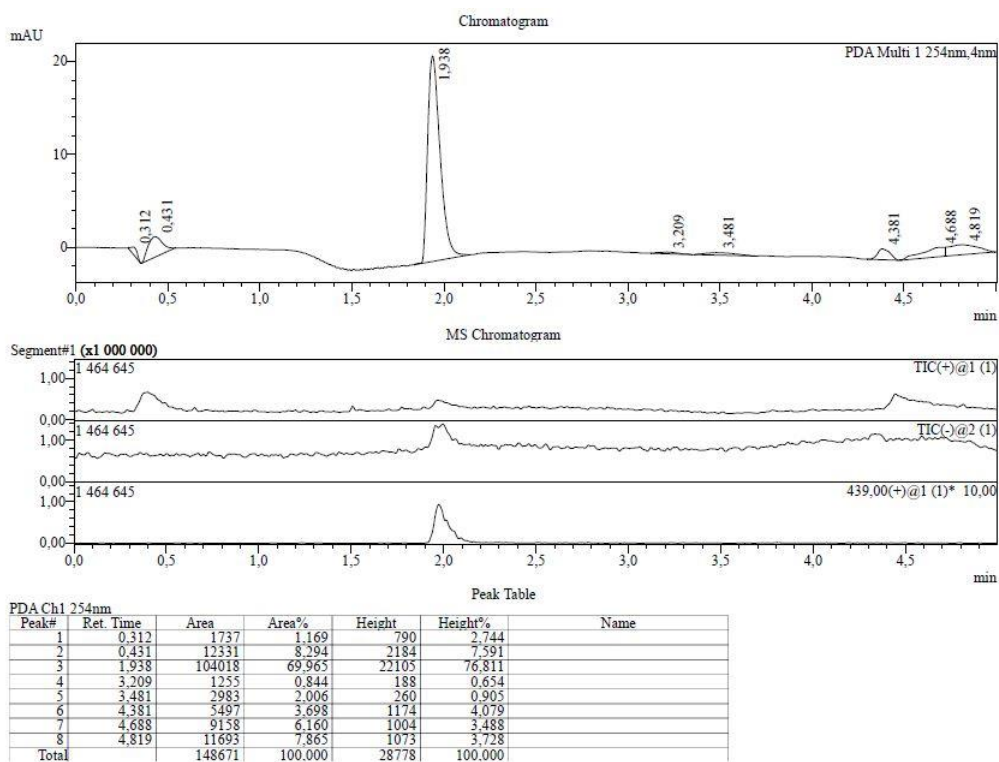

**Supplementary Fig. 124.** The high-performance liquid chromatography chromatogram of compound IN-8a

## SUPPLEMENTARY REFERENCES

1. Zhang, T. *et al.* Discovery of Potent and Selective Covalent Inhibitors of JNK. *Chem Biol* **19**, 140–154 (2012).
2. Gaussian 16, Revision A.03, Frisch, M. J. *et al.* Gaussian, Inc., Wallingford CT, 2016.
3. Chai, J. Da & Head-Gordon, M. Long-range corrected hybrid density functionals with damped atom–atom dispersion corrections. *Physical Chemistry Chemical Physics* **10**, 6615–6620 (2008).
4. Chai, J. Da & Head-Gordon, M. Systematic optimization of long-range corrected hybrid density functionals. *Journal of Chemical Physics* **128**, 84106 (2008).
5. Marenich, A. V., Cramer, C. J. & Truhlar, D. G. Universal solvation model based on solute electron density and on a continuum model of the solvent defined by the bulk dielectric constant and atomic surface tensions. *Journal of Physical Chemistry B* **113**, 6378–6396 (2009).
6. Weigend, F. & Ahlrichs, R. Balanced basis sets of split valence, triple zeta valence and quadruple zeta valence quality for H to Rn: Design and assessment of accuracy. *Physical Chemistry Chemical Physics* **7**, 3297–3305 (2005).
7. Falivene, L. *et al.* Towards the online computer-aided design of catalytic pockets. *Nature Chemistry* 2019 11:10 **11**, 872–879 (2019).
8. Berkes, B. *et al.* Expedient and Diastereodivergent Assembly of Terpenoid Decalin Subunits having Quaternary Stereocenters through Organocatalytic Robinson Annulation of Nazarov Reagent. *Chemistry – A European Journal* **22**, 18101–18106 (2016).
9. Varga, S. *et al.* Total Syntheses of (–)-Minovincine and (–)-Aspidofractinine through a Sequence of Cascade Reactions. *Angewandte Chemie International Edition* **59**, 13547–13551 (2020).
10. McIver, E. G. *et al.* Synthesis and structure–activity relationships of a novel series of pyrimidines as potent inhibitors of TBK1/IKKε kinases. *Bioorg Med Chem Lett* **22**, 7169–7173 (2012).
11. Flaugh, M. E., Crowell, T. A. & Farlow, D. S. Acid-catalyzed annelation of .alpha.-alkylaldehydes and .alpha.,.beta.-unsaturated ketones. A one-pot synthesis of 4,4-dimethyl-2-cyclohexen-1-one. *J Org Chem* **45**, 5399–5400 (1980).
12. Deny, L. J. *et al.* Bis-Michael Acceptors as Novel Probes to Study the Keap1/Nrf2/ARE Pathway. *J Med Chem* **59**, 9431–9442 (2016).
13. Schultz, A. G. & Sundararaman, P. Stereochemical control in cyclofunctionalization of olefinic alcohols and olefinic phenols with benzeneselenenyl chloride. *J Org Chem* **49**, 2455–2462 (1984).

14. Peelen, T. J., Chi, Y., English, E. P. & Gellman, S. H. Synthesis of 4,4-Disubstituted 2-Aminocyclopentanecarboxylic Acid Derivatives and Their Incorporation into 12-Helical  $\beta$ -Peptides. *Org Lett* **6**, 4411–4414 (2004).
15. Meyer, C., Piva, O. & Pete, J. P. [2+2] Photocycloadditions and Photorearrangements of 2-Alkenylcarboxamido-2-cycloalken-1-ones. *Tetrahedron* **56**, 4479–4489 (2000).
16. Schierle, S. *et al.* Dual Farnesoid X Receptor/Soluble Epoxide Hydrolase Modulators Derived from Zafirlukast. *ChemMedChem* **15**, 50–67 (2020).
17. El-Mansy, M. F., Kang, J. Y., Lingampally, R. & Carter, R. G. Proline Sulfonamide-Catalyzed, Domino Process for Asymmetric Synthesis of Amino- and Hydroxy-Substituted Bicyclo[2.2.2]octanes. *European J Org Chem* **2016**, 150–157 (2016).
18. Kokhan, S. O., Valter, Y. B., Tymtsunik, A. V., Komarov, I. V. & Grygorenko, O. O. Bicyclo[1.1.1]pentane-Derived Building Blocks for Click Chemistry. *European J Org Chem* **2017**, 6450–6456 (2017).
19. Mu, F. *et al.* Design, Synthesis, and Biological Evaluation of a Series of Lavendustin A Analogues That Inhibit EGFR and Syk Tyrosine Kinases, as Well as Tubulin Polymerization. *J Med Chem* **44**, 441–452 (2001).
20. Tang, X. J. *et al.* Photorelease of Pyridines Using a Metal-Free Photoremovable Protecting Group. *Angewandte Chemie International Edition* **59**, 18386–18389 (2020).
