# Supplementary material for: Reversible covalent c-Jun N-terminal kinase inhibitors targeting a specific cysteine by precision-guided Michael-acceptor warheads
Source: PubMed Central journal article supplement — Nat Commun. 2024 Oct 4;15:8606. doi: 10.1038/s41467-024-52573-2 (PMC11452492; doi:10.1038/s41467-024-52573-2), 2024-10-04
Supplement: 41467_2024_52573_MOESM3_ESM.pdf [file 41467_2024_52573_MOESM3_ESM.pdf]

## Reporting Summary

Nature Portfolio wishes to improve the reproducibility of the work that we publish. This form provides structure for consistency and transparency in reporting. For further information on Nature Portfolio policies, see our [Editorial Policies](#) and the [Editorial Policy Checklist](#).

### Statistics

For all statistical analyses, confirm that the following items are present in the figure legend, table legend, main text, or Methods section.

- | n/a                                 | Confirmed                                                                                                                                                                                                                                                                                      |
|-------------------------------------|------------------------------------------------------------------------------------------------------------------------------------------------------------------------------------------------------------------------------------------------------------------------------------------------|
| <input type="checkbox"/>            | <input checked="" type="checkbox"/> The exact sample size ( $n$ ) for each experimental group/condition, given as a discrete number and unit of measurement                                                                                                                                    |
| <input type="checkbox"/>            | <input checked="" type="checkbox"/> A statement on whether measurements were taken from distinct samples or whether the same sample was measured repeatedly                                                                                                                                    |
| <input type="checkbox"/>            | <input checked="" type="checkbox"/> The statistical test(s) used AND whether they are one- or two-sided<br><i>Only common tests should be described solely by name; describe more complex techniques in the Methods section.</i>                                                               |
| <input checked="" type="checkbox"/> | <input type="checkbox"/> A description of all covariates tested                                                                                                                                                                                                                                |
| <input checked="" type="checkbox"/> | <input type="checkbox"/> A description of any assumptions or corrections, such as tests of normality and adjustment for multiple comparisons                                                                                                                                                   |
| <input type="checkbox"/>            | <input checked="" type="checkbox"/> A full description of the statistical parameters including central tendency (e.g. means) or other basic estimates (e.g. regression coefficient) AND variation (e.g. standard deviation) or associated estimates of uncertainty (e.g. confidence intervals) |
| <input type="checkbox"/>            | <input checked="" type="checkbox"/> For null hypothesis testing, the test statistic (e.g. $F$ , $t$ , $r$ ) with confidence intervals, effect sizes, degrees of freedom and $P$ value noted<br><i>Give <math>P</math> values as exact values whenever suitable.</i>                            |
| <input checked="" type="checkbox"/> | <input type="checkbox"/> For Bayesian analysis, information on the choice of priors and Markov chain Monte Carlo settings                                                                                                                                                                      |
| <input checked="" type="checkbox"/> | <input type="checkbox"/> For hierarchical and complex designs, identification of the appropriate level for tests and full reporting of outcomes                                                                                                                                                |
| <input type="checkbox"/>            | <input checked="" type="checkbox"/> Estimates of effect sizes (e.g. Cohen's $d$ , Pearson's $r$ ), indicating how they were calculated                                                                                                                                                         |

*Our web collection on [statistics for biologists](#) contains articles on many of the points above.*

### Software and code

Policy information about [availability of computer code](#)

Data collection

Data analysis

For manuscripts utilizing custom algorithms or software that are central to the research but not yet described in published literature, software must be made available to editors and reviewers. We strongly encourage code deposition in a community repository (e.g. GitHub). See the Nature Portfolio [guidelines for submitting code & software](#) for further information.

## Data

Policy information about [availability of data](#)

All manuscripts must include a [data availability statement](#). This statement should provide the following information, where applicable:

- Accession codes, unique identifiers, or web links for publicly available datasets
- A description of any restrictions on data availability
- For clinical datasets or third party data, please ensure that the statement adheres to our [policy](#)

Crystal structures of JNK1-1aR-IN-8, -1aS-IN-8, and -1a'R-IN-8 are deposited in the Protein Data Bank with accession codes 8PTA [<http://doi.org/10.2210/pdb8pta/pdb>], 8PT9 [<http://doi.org/10.2210/pdb8pt9/pdb>], and 8PT8 [<http://doi.org/10.2210/pdb8pt8/pdb>]. The following X-ray structures are available from the PDB: 3V6S [<http://doi.org/10.2210/pdb3v6s/pdb>], 2ERK [<http://doi.org/10.2210/pdb2erk/pdb>] and 3S95 [<http://doi.org/10.2210/pdb3s95/pdb>]. Source data are provided with this paper.

## Research involving human participants, their data, or biological material

Policy information about studies with [human participants or human data](#). See also policy information about [sex, gender \(identity/presentation\), and sexual orientation](#) and [race, ethnicity and racism](#).

|                                                                    |                      |
|--------------------------------------------------------------------|----------------------|
| Reporting on sex and gender                                        | Not applicable (N/A) |
| Reporting on race, ethnicity, or other socially relevant groupings | N/A                  |
| Population characteristics                                         | N/A                  |
| Recruitment                                                        | N/A                  |
| Ethics oversight                                                   | N/A                  |

Note that full information on the approval of the study protocol must also be provided in the manuscript.

## Field-specific reporting

Please select the one below that is the best fit for your research. If you are not sure, read the appropriate sections before making your selection.

- Life sciences       Behavioural & social sciences       Ecological, evolutionary & environmental sciences

For a reference copy of the document with all sections, see [nature.com/documents/nr-reporting-summary-flat.pdf](https://www.nature.com/documents/nr-reporting-summary-flat.pdf)

## Life sciences study design

All studies must disclose on these points even when the disclosure is negative.

|                 |                                                                                                                                                                                                                                                                                                     |
|-----------------|-----------------------------------------------------------------------------------------------------------------------------------------------------------------------------------------------------------------------------------------------------------------------------------------------------|
| Sample size     | No sample size was applied in this study to predetermine sample sizes for experiments using cell lines. A sample size of three was used to evaluate the spread of the data and was determined based upon other studies with similar methodologies (PMID: 26538579, PMID: 33188182, PMID: 38078976). |
| Data exclusions | No data were excluded from the analyses.                                                                                                                                                                                                                                                            |
| Replication     | All experiments were replicated as stated in the figure legends.                                                                                                                                                                                                                                    |
| Randomization   | There was no need for the randomization of our samples.                                                                                                                                                                                                                                             |
| Blinding        | There was no blinding, as the same investigator performed most experiments and analyzed the data.                                                                                                                                                                                                   |

## Reporting for specific materials, systems and methods

We require information from authors about some types of materials, experimental systems and methods used in many studies. Here, indicate whether each material, system or method listed is relevant to your study. If you are not sure if a list item applies to your research, read the appropriate section before selecting a response.

## Materials &amp; experimental systems

| n/a                                 | Involvement                                                     |
|-------------------------------------|-----------------------------------------------------------------|
| <input type="checkbox"/>            | <input checked="" type="checkbox"/> Antibodies                  |
| <input type="checkbox"/>            | <input checked="" type="checkbox"/> Eukaryotic cell lines       |
| <input checked="" type="checkbox"/> | <input type="checkbox"/> Palaeontology and archaeology          |
| <input type="checkbox"/>            | <input checked="" type="checkbox"/> Animals and other organisms |
| <input checked="" type="checkbox"/> | <input type="checkbox"/> Clinical data                          |
| <input checked="" type="checkbox"/> | <input type="checkbox"/> Dual use research of concern           |
| <input checked="" type="checkbox"/> | <input type="checkbox"/> Plants                                 |

## Methods

| n/a                                 | Involvement                                     |
|-------------------------------------|-------------------------------------------------|
| <input checked="" type="checkbox"/> | <input type="checkbox"/> ChIP-seq               |
| <input checked="" type="checkbox"/> | <input type="checkbox"/> Flow cytometry         |
| <input checked="" type="checkbox"/> | <input type="checkbox"/> MRI-based neuroimaging |

## Antibodies

|                 |                                                                                                                                                                                                                                                                                                                                                                                                                                                                                                                                                   |
|-----------------|---------------------------------------------------------------------------------------------------------------------------------------------------------------------------------------------------------------------------------------------------------------------------------------------------------------------------------------------------------------------------------------------------------------------------------------------------------------------------------------------------------------------------------------------------|
| Antibodies used | <p>The primary antibodies were the following: anti-phospho JNK (Cell Signaling #9251; 1:1000), anti-phospho-c-Jun(Ser73) (Cell Signaling #9164; 1:1000), anti-phospho p38 (Cell Signaling #9215, 1:3000), anti-phospho MK2 (Cell Signaling #3007, 1:1000), anti-<math>\alpha</math>-tubulin (Sigma #T6199; 1:10000), or anti-FLAG (Sigma #F1804; 1:10000).</p> <p>The secondary antibodies were the following: IRDye 680RD (Goat anti-mouse IgG; Li-cor #926-68070; 1:0000) or IRDye 800CW (Goat anti-rabbit IgG, Li-Cor #926-32211; 1:5000).</p> |
| Validation      | <p>The primary antibodies used in this study were all validated by the manufacturers and can be checked using their respective catalog number on the following websites:<br/>           Cell Signaling: <a href="https://www.cellsignal.com">https://www.cellsignal.com</a><br/>           Sigma: <a href="http://www.sigma.com">http://www.sigma.com</a></p>                                                                                                                                                                                     |

## Eukaryotic cell lines

Policy information about [cell lines and Sex and Gender in Research](#)

|                                                                   |                                                                                                                                                                                             |
|-------------------------------------------------------------------|---------------------------------------------------------------------------------------------------------------------------------------------------------------------------------------------|
| Cell line source(s)                                               | HEK293T (ATCC, CRL-3216), AP-1 Reporter - HEK293 (BPS Bioscience, #60405), HEK293T MKK6EE (created from HEK293T see PMID: 32649858), SH-SY5Y MKK7ACT (Created from SH-SY5Y, ATCC CRL-2266), |
| Authentication                                                    | The cell lines were not authenticated.                                                                                                                                                      |
| Mycoplasma contamination                                          | The cell lines were not tested for mycoplasma contamination, apart from .SH-SY5Y MKK7ACT, which was tested negative by MycoAlert PLUS Mycoplasma Detection Kit (Lonza #LT07-710).           |
| Commonly misidentified lines (See <a href="#">ICLAC</a> register) | Commonly misidentified cell line was not used in this study.                                                                                                                                |
